# Supplementary material
Source: PubMed Central journal article supplement (PMC5890438)
Supplement: NIHMS953485-supplement-Supporting_Information.pdf [file NIHMS953485-supplement-Supporting_Information.pdf]

## Supporting Information

### Metabolomic “Dark Matter” Dependent on Peroxisomal $\beta$ -Oxidation in *Caenorhabditis elegans*

Alexander B. Artyukhin<sup>\*,†</sup>, Ying K. Zhang<sup>†</sup>, Allison E. Akagi<sup>‡</sup>, Oishika Panda<sup>†</sup>, Paul W. Sternberg<sup>‡</sup>,  
and Frank C. Schroeder<sup>\*,†</sup>

<sup>†</sup>Boyce Thompson Institute and Department of Chemistry and Chemical Biology, Cornell University, Ithaca, NY

<sup>‡</sup>Division of Biology and Biological Engineering, California Institute of Technology, Pasadena, CA

## Table of Contents

|                                                                                                                                                                             |    |
|-----------------------------------------------------------------------------------------------------------------------------------------------------------------------------|----|
| Supporting Methods                                                                                                                                                          | 3  |
| Supporting Figures                                                                                                                                                          | 16 |
| Supporting Tables                                                                                                                                                           | 24 |
| Table S1. Comparison of feature extraction methods for the <i>C. elegans</i> data set.                                                                                      | 24 |
| Table S2. Differential metabolites from <i>C. elegans</i> L1 medium, ES- mode, that are decreased or absent in <i>daf-22</i> medium compared to N2.                         | 25 |
| Table S3. Differential metabolites from <i>C. elegans</i> growth medium, ES- mode, that are decreased or absent in <i>daf-22</i> medium compared to N2.                     | 31 |
| Table S4. Differential metabolites from <i>C. elegans</i> L1 medium, ES+ mode, that are decreased or absent in <i>daf-22</i> medium compared to N2.                         | 39 |
| Table S5. Differential metabolites from <i>C. elegans</i> growth medium, ES+ mode, that are decreased or absent in <i>daf-22</i> medium compared to N2.                     | 42 |
| Table S6. Differential metabolites from <i>C. elegans</i> L1 medium, ES- mode, that are decreased or absent in N2 medium compared to <i>daf-22</i> .                        | 45 |
| Table S7. Differential metabolites from <i>C. elegans</i> growth medium, ES- mode, that are decreased or absent in N2 medium compared to <i>daf-22</i> .                    | 47 |
| Table S8. Differential metabolites from <i>C. elegans</i> L1 medium, ES+ mode, that are decreased or absent in N2 medium compared to <i>daf-22</i> .                        | 54 |
| Table S9. Differential metabolites from <i>C. elegans</i> growth medium, ES+ mode, that are decreased or absent in N2 medium compared to <i>daf-22</i> .                    | 59 |
| Table S10. Differential metabolites from <i>P. pacificus</i> J2 medium, ES- mode, that are decreased or absent in RS2770 Ppa- <i>daf-22</i> medium compared to RS2333.      | 64 |
| Table S11. Differential metabolites from <i>P. pacificus</i> growth medium, ES- mode, that are decreased or absent in RS2770 Ppa- <i>daf-22</i> medium compared to RS2333.  | 67 |
| Table S12. Differential metabolites from <i>P. pacificus</i> J2 medium, ES+ mode, that are decreased or absent in RS2770 Ppa- <i>daf-22</i> medium compared to RS2333.      | 72 |
| Table S13. Differential metabolites from <i>P. pacificus</i> growth medium, ES+ mode, that are decreased or absent in RS2770 Ppa- <i>daf-22</i> medium compared to RS2333.  | 74 |
| Table S14. Differential metabolites from <i>P. pacificus</i> J2 medium, ES- mode, that are decreased or absent in RS2333 medium compared to RS2770 Ppa- <i>daf-22</i> .     | 81 |
| Table S15. Differential metabolites from <i>P. pacificus</i> growth medium, ES- mode, that are decreased or absent in RS2333 medium compared to RS2770 Ppa- <i>daf-22</i> . | 83 |
| Table S16. Differential metabolites from <i>P. pacificus</i> J2 medium, ES+ mode, which are decreased or absent in RS2333 medium compared to RS2770 Ppa- <i>daf-22</i> .    | 91 |
| Table S17. Differential metabolites from <i>P. pacificus</i> growth medium, ES+ mode, that are decreased or absent in RS2333 medium compared to RS2770 Ppa- <i>daf-22</i> . | 93 |
| Table S18. SMID-DB identifiers, retention times, and m/z of known ascarosides detected in the analyzed <i>C. elegans</i> N2 cultures.                                       | 96 |
| Supporting References                                                                                                                                                       | 97 |

## SUPPORTING METHODS

Synthesis of (4-((*R,E*)-6-(((2*R*,3*R*,5*R*,6*S*)-3,5-dihydroxy-6-methyltetrahydro-2*H*-pyran-2-yl)oxy)-hept-2-enamido)benzoyl)glutamic acid (**ascr#81**)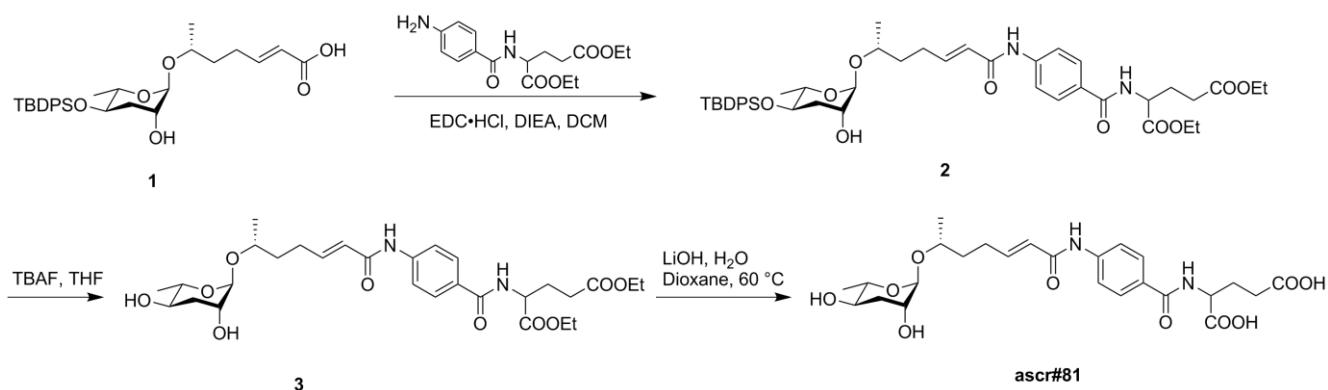

**1** was prepared following a previously published procedure<sup>1</sup>. To a stirred solution of **1** (32 mg, 0.062 mmol) in dry dichloromethane (1 mL), *N*-(4-aminobenzoyl)-L-glutamic acid diethyl ester (72 mg, 0.223 mmol) and 1-(3-dimethylaminopropyl)-3-ethylcarbodiimide hydrochloride (EDC·HCl) (46 mg, 0.240 mmol) were added at room temperature. The resulting mixture was stirred for 30 min, and *N,N*-diisopropylethylamine (42  $\mu$ L, 0.241 mmol) was added. After 20 hours, the reaction was concentrated *in vacuo*. Flash column chromatography on silica using a gradient of 50-100% ethyl acetate in hexanes afforded **2** and some *N*-(4-aminobenzoyl)-L-glutamic acid diethyl ester (67.9 mg) as an off-white powder. The obtained mixture (10 mg) was dissolved in tetrahydrofuran (2 mL), and tetrabutylammonium fluoride solution (1 M in THF, 50  $\mu$ L, 50  $\mu$ mol) was added. After stirring overnight, the reaction was concentrated *in vacuo*. Flash column chromatography on silica using a gradient of 60-100% ethyl acetate in hexanes afforded **3** (3.1 mg, 5.3  $\mu$ mol).

To a solution of **3** (3.1 mg, 5.3  $\mu$ mol) in 1,4-dioxane (0.5 mL), lithium hydroxide monohydrate (1.4 mg, 0.032 mmol) in H<sub>2</sub>O (0.2 mL) was added, and the resulting mixture was stirred at 60 °C for 12 hours. Glacial acetic acid (0.5 mL) was added, and the reaction was concentrated *in vacuo*. HPLC provided a pure sample of **ascr#81** (1.4 mg, 2.7  $\mu$ mol 54%).

**NMR Spectroscopic Data for ascr#81.** <sup>1</sup>H (600 MHz), <sup>13</sup>C (151 MHz), HSQC and HMBC NMR spectroscopic data for **ascr#81** in methanol-*d*<sub>4</sub>. Chemical shifts were referenced to (CD<sub>2</sub>HOD) = 3.31 ppm and (CD<sub>2</sub>HOD) = 49.00 ppm.

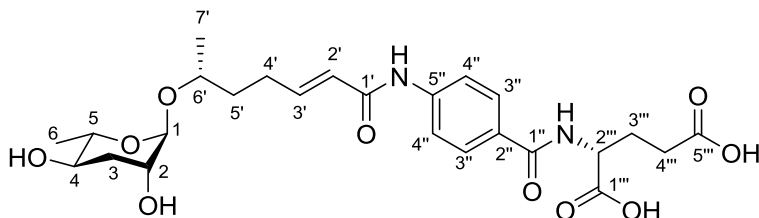

| Position | $\delta^{13}\text{C}$ [ppm] | $\delta^1\text{H}$ [ppm]     | $^1\text{H}, ^1\text{H}$ -coupling constants [Hz] | HMBC correlations               |
|----------|-----------------------------|------------------------------|---------------------------------------------------|---------------------------------|
| 1        | 166.6                       |                              |                                                   |                                 |
| 2        | 125.0                       | 6.16                         | $J_{2,3} = 15.3$                                  | C-1, C-3, C-4, C-5              |
| 3        | 147.3                       | 6.99                         | $J_{3,4} = 6.9$                                   | C-1, C-2, C-4, C-5              |
| 4        | 29.2                        | 2.39 (4a)<br>2.44 (4b)       |                                                   | C-2, C-3, C-5, C-6              |
| 5        | 36.7                        | 1.72                         |                                                   | C-3, C-4, C-6, C-7              |
| 6        | 71.4                        | 3.86                         |                                                   | C-1', C-4, C-5                  |
| 7        | 18.9                        | 1.18                         | $J_{6,7} = 6.1$                                   | C-5, C-6                        |
| 1'       | 97.1                        | 4.68                         | $J_{1',2'} \approx 1.5$                           | C-2', C-3', C-5'                |
| 2'       | 69.7                        | 3.74                         | $J_{2',3'ax} = 3.1, J_{2',3'eq} = 3.6,$           | C-1', C-3', C-4'                |
| 3'       | 35.8                        | 1.79 (ax)                    | $J_{3'ax,4'} = 11.6, J_{3'ax,3'eq} = 13.3$        | C-1', C-2', C-4', C-5'          |
|          |                             | 1.97 (eq)                    | $J_{3'eq,4'} = 4.6$                               | C-1', C-2', C-4', C-5',<br>C-6' |
| 4'       | 68.1                        | 3.53                         | $J_{4',5'} = 9.3$                                 | C-2', C-3', C-5', C-6'          |
| 5'       | 71.1                        | 3.63                         | $J_{5',6'} = 6.1$                                 | C-1', C-3', C-4', C-6'          |
| 6'       | 17.9                        | 1.22                         |                                                   | C-1', C-4', C-5'                |
| 1''      | 168.7                       |                              |                                                   |                                 |
| 2''      | 143.0                       |                              |                                                   |                                 |
| 3''      | 129.1                       | 7.85                         | $J_{3'',4''} = 8.6$                               | C-1'', C-2'', C-4''             |
| 4''      | 120.2                       | 7.73                         |                                                   | C-1'', C-2'', C-3'', C-5''      |
| 5''      | 130.6                       |                              |                                                   |                                 |
| 1'''     | 177.5                       |                              |                                                   |                                 |
| 2'''     | 54.9                        | 4.50                         |                                                   | C-1'', C-1''', C-3''', C-4'''   |
| 3'''     | 28.4                        | 2.11 (3'''a)<br>2.28 (3'''b) |                                                   | C-1''', C-2''', C-4'''          |
| 4'''     | 31.8                        | 2.44                         |                                                   | C-2''', C-3''', C-5'''          |
| 5'''     | 178.0                       |                              |                                                   |                                 |

**Synthesis of (2*R*,3*R*,4*R*,5*R*)-2-(6-(dimethylamino)-9*H*-purin-9-yl)-4-hydroxy-5-(hydroxymethyl)-tetrahydrofuran-3-yl (*R,E*)-8-(((2*R*,3*R*,5*R*,6*S*)-3,5-dihydroxy-6-methyltetrahydro-2*H*-pyran-2-yl)oxy)non-2-enoate (nuclasc#2) and (2*R*,3*S*,4*R*,5*R*)-5-(6-(dimethylamino)-9*H*-purin-9-yl)-3-hydroxy-2-(hydroxymethyl)tetrahydrofuran-4-yl (*R,E*)-8-(((2*R*,3*R*,5*R*,6*S*)-3,5-dihydroxy-6-methyltetrahydro-2*H*-pyran-2-yl)oxy)non-2-enoate (nuclas#31)**

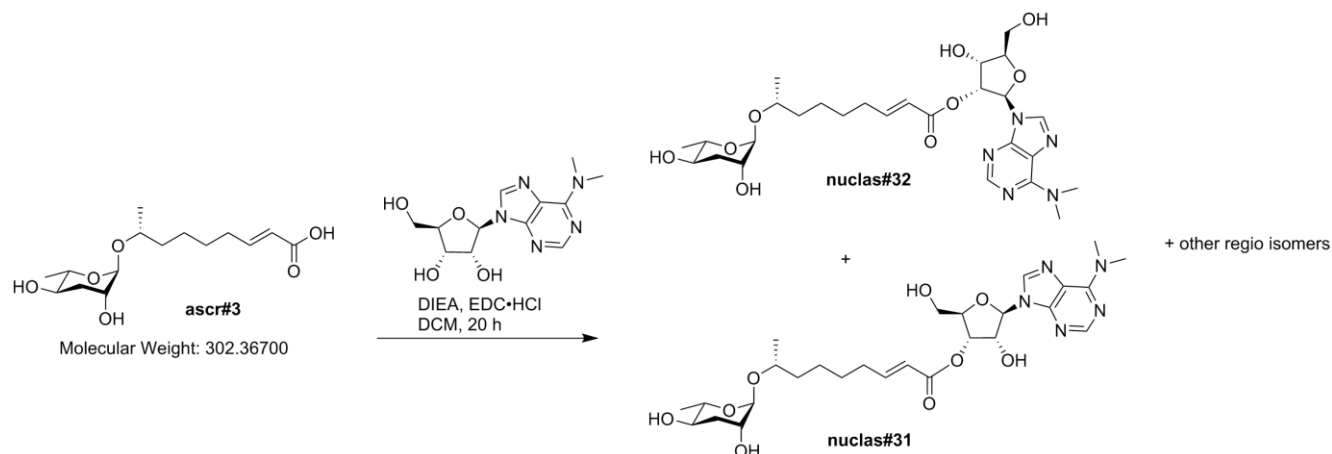

To a stirred solution of **ascr#3** (42 mg, 0.139 mmol) in dry dichloromethane (1 mL), 1-(3-dimethylaminopropyl)-3-ethylcarbodiimide hydrochloride (EDC·HCl) (80 mg, 0.417 mmol) and 6-dimethylaminopurine-9-ribose (205 mg, 0.695 mmol) were added at room temperature. The resulting mixture was stirred for 30 min, and *N,N*-diisopropylethylamine (72.6  $\mu$ L, 0.417 mmol) was added. After 20 hours, the reaction was concentrated *in vacuo*. Flash column chromatography on silica using a gradient of 0-20% methanol in dichloromethane afforded a crude mixture of **aduas#1** and byproducts (214 mg) as a clear oil. HPLC fractionation of a portion of this material provided a pure sample of **nuclas#32** (1.4 mg, 2.4  $\mu$ mol, 1.7%) and **nuclas#31** (3.1 mg, 5.3  $\mu$ mol, 3.8%) whose HPLC retention times and MS/MS fragmentation patterns were identical to those of the natural products.

**NMR Spectroscopic Data of nuclasc#32.**  $^1\text{H}$  (600 MHz), HSQC, and HMBC NMR spectroscopic data were acquired in methanol- $d_4$ . Chemical shifts were referenced to  $(\text{CD}_2\text{HOD}) = 3.31$  ppm and  $(\text{CD}_2\text{HOD}) = 49.00$  ppm.

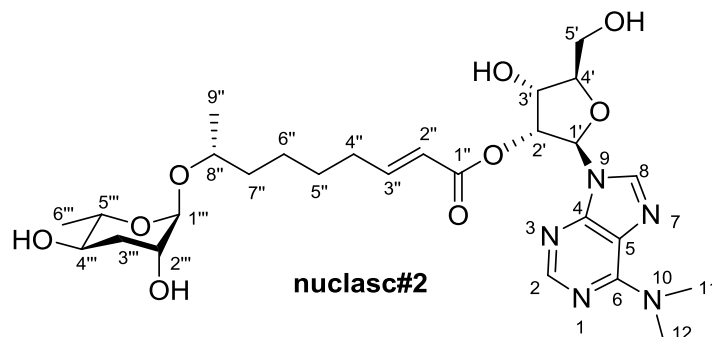

| Position | $\delta^{13}\text{C}$ [ppm] | $\delta^1\text{H}$ [ppm]   | $^1\text{H}, ^1\text{H}$ -coupling constants [Hz]     | HMBC correlations      |
|----------|-----------------------------|----------------------------|-------------------------------------------------------|------------------------|
| 1        |                             |                            |                                                       |                        |
| 2        | 152.7                       |                            |                                                       |                        |
| 3        |                             |                            |                                                       |                        |
| 4        | 150.1                       |                            |                                                       |                        |
| 5        | 121.4                       |                            |                                                       |                        |
| 6        | 155.7                       |                            |                                                       |                        |
| 7        |                             |                            |                                                       |                        |
| 8        | 139.7                       |                            |                                                       |                        |
| 9        |                             |                            |                                                       |                        |
| 1'       | 88.3                        | 6.22                       | $J_{1',2'} = 6.4$                                     | C-2', C-4, C-8         |
| 2'       | 76.5                        | 5.73                       | $J_{2',3'} = 5.3$                                     | C-1''                  |
| 3'       | 71.1                        | 4.63                       | $J_{3',4'} = 2.9$                                     | C-2',                  |
| 4'       | 88.3                        | 4.20                       | $J_{4',5'} = 2.9,$                                    |                        |
| 5'       | 63.2                        | 3.91 (5'a)<br>3.77 (5'b)   | $J_{4',5'} = 2.3, J_{5',5'} = 12.4$                   |                        |
| 1''      | 166.3                       |                            |                                                       |                        |
| 2''      | 120.7                       | 5.90                       | $J_{2'',3''} = 15.8$                                  | C-1''                  |
| 3''      | 152.2                       | 7.03                       | $J_{3'',4''} = 7.1$                                   | C-1''                  |
| 4''      | 33.1                        | 2.24                       |                                                       | C-2'', C-5''           |
| 5'', 6'' | 28.6, 26.3                  | 1.37-1.58                  |                                                       |                        |
| 7''      | 37.9                        | 1.59 (7''a)<br>1.53 (7''b) |                                                       |                        |
| 8''      | 72.3                        | 3.77                       |                                                       |                        |
| 9''      | 19.2                        | 1.11                       | $J_{8'',9''} = 6.2$                                   | C-7'', C-8''           |
| 1'''     | 97.4                        | 4.63                       | $J_{1''',2'''} \approx 1.5$                           | C-2''', C-3''', C-5''' |
| 2'''     | 69.8                        | 3.70                       | $J_{2''',3''',ax} = 3.0, J_{2''',3''',eq} = 3.7$      |                        |
| 3'''     | 35.8                        | 1.74 (ax)                  | $J_{3''',ax,4'''} = 11.3, J_{3''',ax,3''',eq} = 13.5$ |                        |

|      |      |           |                       |                |
|------|------|-----------|-----------------------|----------------|
|      |      | 1.93 (eq) | $J_{3''eq,4''} = 4.6$ |                |
| 4''' | 68.1 | 3.51      | $J_{4''',5''} = 9.5$  | C-5'''         |
| 5''' | 71.1 | 3.60      | $J_{5''',6''} = 6.3$  |                |
| 6''' | 17.9 | 1.19      |                       | C-4''', C-5''' |

**NMR Spectroscopic Data of nuclasc#31.**  $^1\text{H}$  (600 MHz), HSQC, and HMBC NMR spectroscopic data were acquired in methanol- $d_4$ . Chemical shifts were referenced to  $(\text{CD}_2\text{HOD}) = 3.31$  ppm and  $(\text{CD}_2\text{HOD}) = 49.00$  ppm.

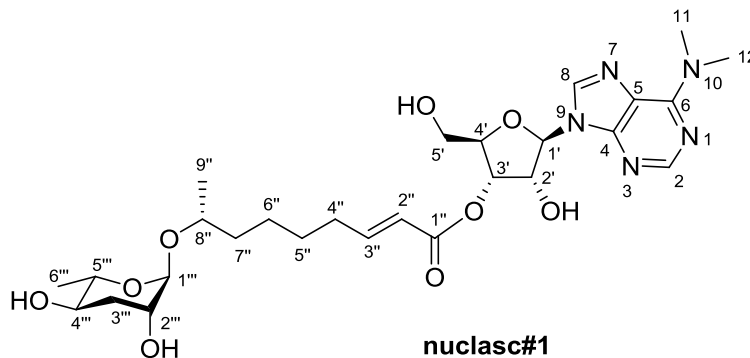

| Position | $\delta^{13}\text{C}$ [ppm] | $\delta^1\text{H}$ [ppm] | $^1\text{H}, ^1\text{H}$ -coupling constants [Hz]    | HMBC correlations       |
|----------|-----------------------------|--------------------------|------------------------------------------------------|-------------------------|
| 1        |                             |                          |                                                      |                         |
| 2        | 152.7                       |                          |                                                      |                         |
| 3        |                             |                          |                                                      |                         |
| 4        | 150.1                       |                          |                                                      |                         |
| 5        | 121.4                       |                          |                                                      |                         |
| 6        | 155.7                       |                          |                                                      |                         |
| 7        |                             |                          |                                                      |                         |
| 8        | 140.1                       |                          |                                                      |                         |
| 9        |                             |                          |                                                      |                         |
| 1'       | 90.6                        | 5.99                     | $J_{1',2'} = 7.4$                                    | C-2', C-4, C-8          |
| 2'       | 73.6                        | 5.01                     | $J_{2',3'} = 5.4$                                    | C-3'                    |
| 3'       | 74.9                        | 5.44                     | $J_{3',4'} = 1.7$                                    | C-1', C-4', C-5', C-1'' |
| 4'       | 85.9                        | 4.28                     |                                                      |                         |
| 5'       | 63.2                        | 3.88 (5'a)<br>3.80 (5'b) | $J_{4',5'} = 2.3, J_{4',5'} = 2.0, J_{5',5'} = 12.5$ |                         |
| 1''      | 166.8                       |                          |                                                      |                         |
| 2''      | 121.7                       | 6.00                     | $J_{2'',3''} = 15.5$                                 | C-1'', C-4''            |
| 3''      | 150.0                       | 7.13                     | $J_{3'',4''} = 6.9$                                  | C-1'', C-4'', C-5''     |
| 4''      | 33.1                        | 2.31                     |                                                      | C-5'', C-6''            |
| 5'', 6'' | 28.8, 26.5                  | 1.41-1.62                |                                                      |                         |

|      |      |                            |                                                    |                               |
|------|------|----------------------------|----------------------------------------------------|-------------------------------|
| 7''  | 37.9 | 1.58 (7''a)<br>1.52 (7''b) |                                                    |                               |
| 8''  | 72.3 | 3.80                       |                                                    |                               |
| 9''  | 19.2 | 1.13                       | $J_{8'',9''} = 6.1$                                | C-7'', C-8''                  |
| 1''' | 97.4 | 4.65                       | $J_{1''',2'''} \approx 1.5$                        | C-2''', C-3''', C-5''', C-8'' |
| 2''' | 69.8 | 3.72                       | $J_{2''',3'''ax} = 3.0, J_{2''',3'''eq} = 3.8$     | C-4'''                        |
| 3''' | 35.8 | 1.77 (ax)                  | $J_{3'''ax,4'''} = 11.6, J_{3'''ax,3'''eq} = 13.4$ |                               |
|      |      | 1.95 (eq)                  | $J_{3'''eq,4'''} = 4.5$                            |                               |
| 4''' | 68.1 | 3.52                       | $J_{4''',5'''} = 9.5$                              | C-5'''                        |
| 5''' | 71.1 | 3.63                       | $J_{5''',6'''} = 6.2$                              |                               |
| 6''' | 18.0 | 1.22                       |                                                    | C-4''', C-5'''                |

**(2*S*,3*R*,5*R*,6*R*)-5-hydroxy-6-(((*R*)-5-((2-hydroxyethyl)amino)-5-oxopentan-2-yl)oxy)-2-methyltetrahydro-2*H*-pyran-3-yl 4-(((*R*)-2-hydroxy-2-(4-hydroxyphenyl)ethyl)amino)-4-oxobutanoate (osas#91)**

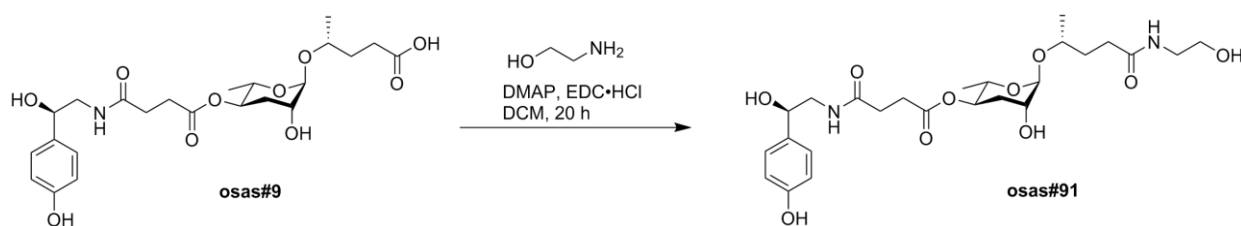

To a stirred solution of **osas#9** (2.6 mg, 5.4  $\mu$ mol) in dry dichloromethane (0.4 mL), 1-(3-dimethylaminopropyl)-3-ethylcarbodiimide hydrochloride (EDC•HCl) (3.1 mg, 16  $\mu$ mol) and ethanolamine (3.3  $\mu$ L, 54  $\mu$ mol) were added at room temperature. The resulting mixture was stirred for 30 min, and 4-dimethylaminopyridine (2.0 mg, 16  $\mu$ mol) was added. After 20 hours, the reaction was concentrated *in vacuo*. Flash column chromatography on silica using a gradient of 0-20% methanol in dichloromethane afforded a mixture of aduasc#1 isomers together with reagent not separated from product (4 mg) as a clear oil. HPLC provided a pure sample of **osas#91** (0.1 mg, 0.19  $\mu$ mol, 3.5%) identical to the natural product.



**NMR Spectroscopic Data of osas#91.**  $^1\text{H}$  (800 MHz), HSQC, and HMBC NMR spectroscopic data were acquired in methanol- $d_4$ . Chemical shifts were referenced to  $(\text{CD}_2\text{HOD}) = 3.31$  ppm and  $(\text{CD}_2\text{HOD}) = 49.00$  ppm.

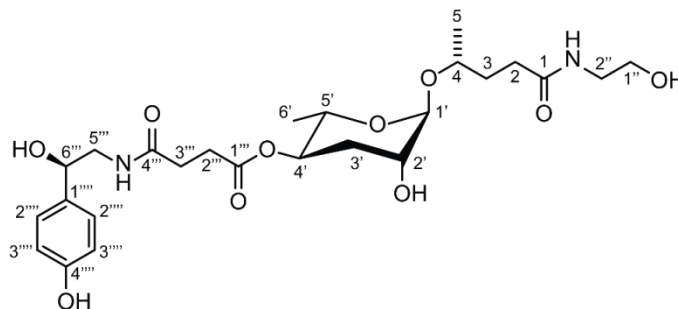

| Position | $^{13}\text{C}$ [ppm] | $^1\text{H}$ [ppm]           | $^1\text{H}$ - $^1\text{H}$ coupling constants (Hz)                            | HMBC correlations      |
|----------|-----------------------|------------------------------|--------------------------------------------------------------------------------|------------------------|
| 1''      | 61.3                  | 3.59                         | $J_{1'',2''} = 6.0$                                                            | C-2''                  |
| 2''      | 42.7                  | 3.29                         |                                                                                | C-1''                  |
| 1        | 175.8                 | ---                          |                                                                                |                        |
| 2        | 33.0                  | 2.30 (2a)<br>2.38 (2b)       |                                                                                | C-1                    |
| 3        | 33.8                  | 1.82                         |                                                                                |                        |
| 4        | 71.6                  | 3.82                         |                                                                                |                        |
| 5        | 18.7                  | 1.16                         |                                                                                | C-3, C-4               |
| 1'''     | 174.2                 | ---                          |                                                                                |                        |
| 2'''     | 31.0                  | 2.48                         | $J_{2''',3'''} = 6.6$                                                          | C-1''', C-3''', C-4''' |
| 3'''     | 30.3                  | 2.58                         |                                                                                | C-1''', C-2''', C-4''' |
| 4'''     | 173.1                 | ---                          |                                                                                |                        |
| 5'''     | 47.8                  | 3.32 (5'''a)<br>3.39 (5'''b) | $J_{5'''a,5'''b} = 13.8$ , $J_{5'''a,6'''} = 8.2$ ,<br>$J_{5'''b,6'''} = 4.9$  | C-4''', C-6'''         |
| 6'''     | 73.0                  | 4.64                         |                                                                                | C-2''''                |
| 1'       | 97.0                  | 4.69                         | $J_{1',2'} \approx 1.5$                                                        | C-4                    |
| 2'       | 69.1                  | 3.72                         | $J_{2',3'ax} = 3.0$ , $J_{2',3'eq} = 3.7$                                      |                        |
| 3'       | 32.6                  | 1.87 (ax)<br>2.04 (eq)       | $J_{3'(ax),3'(eq)} = 12.9$ , $J_{3'(ax),4'} = 11.3$ ,<br>$J_{3'(eq),4'} = 5.3$ |                        |
| 4'       | 71.3                  | 4.87                         | $J_{4',5'} = 9.5$                                                              |                        |
| 5'       | 68.2                  | 3.83                         | $J_{5',6'} = 6.2$                                                              |                        |
| 6'       | 17.8                  | 1.15                         |                                                                                | C-4', C-5'             |
| 1''''    | 134.4                 | ---                          |                                                                                |                        |
| 2''''    | 128.2                 | 7.21                         | $J_{2''',3''''} = 8.3$                                                         | C-4''''                |
| 3''''    | 115.8                 | 6.76                         |                                                                                | C-1''''                |
| 4''''    | 157.9                 | ---                          |                                                                                |                        |

**Synthesis of ((2*R*,3*S*,4*S*,5*R*,6*R*)-3,4,5-trihydroxy-6-(1*H*-indol-1-yl)tetrahydro-2*H*-pyran-2-yl)methyl (*R*)-6-(((2*R*,3*R*,5*R*,6*S*)-3,5-dihydroxy-6-methyltetrahydro-2*H*-pyran-2-yl)oxy)heptanoate (**iglas#1**)**

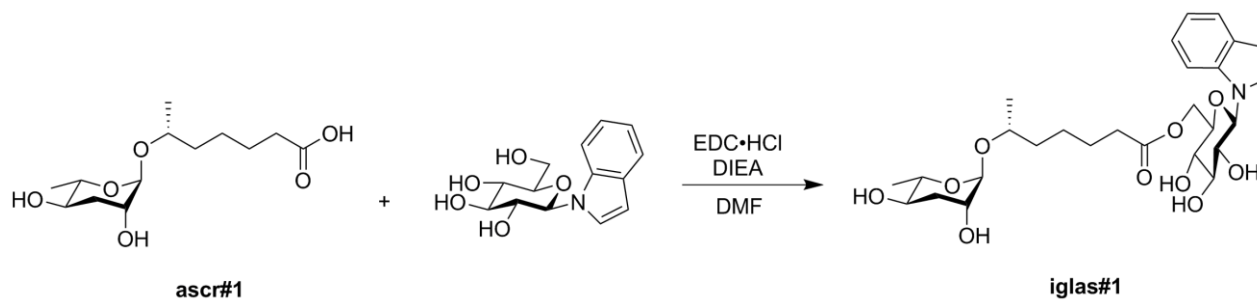

To a stirred solution of **ascr#1** (17 mg, 0.062 mmol) in dry dimethylformamide (0.5 mL), 1-(3-dimethylaminopropyl)-3-ethylcarbodiimide hydrochloride (EDC•HCl) (39 mg, 0.203 mmol) and (3*S*,4*S*,5*S*,6*R*)-2-(Hydroxymethyl)-6-(1*H*-indol-1-yl)-tetrahydro-2*H*-pyran-3,4,5-triol (86 mg, 0.31 mmol) were added at room temperature. The resulting mixture was stirred for 30 min, and *N,N*-diisopropylethylamine (33  $\mu\text{L}$ , 0.19 mmol) was added. After 20 hours, the reaction was concentrated *in vacuo*. Flash column chromatography on silica using a gradient of 0-20% methanol in dichloromethane afforded a crude mixture of **iglas#1** and byproducts as a clear oil. HPLC fractionation of a portion of this material provided a pure sample of **iglas#1** (5  $\mu\text{g}$ ) whose HPLC retention times and MS/MS fragmentation patterns were identical to those of the natural product.

**NMR Spectroscopic Data of iglas#1.**  $^1\text{H}$  (800 MHz) NMR spectroscopic data were acquired in methanol- $d_4$ . Chemical shifts were referenced to ( $\text{CD}_2\text{HOD}$ ) = 3.31 ppm and ( $\underline{\text{C}}\text{D}_2\text{HOD}$ ) = 49.00 ppm.

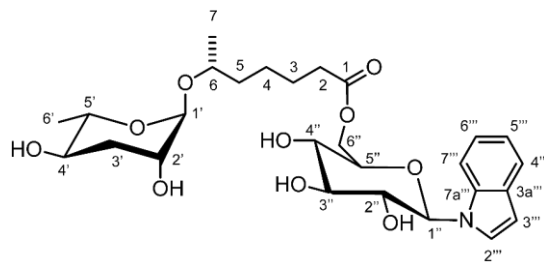

| Position | $^1\text{H}$ [ppm]         | $^1\text{H}$ , $^1\text{H}$ -coupling constants [Hz]                       |
|----------|----------------------------|----------------------------------------------------------------------------|
| 1        | ---                        |                                                                            |
| 2        | 2.34                       |                                                                            |
| 3        | 1.64                       |                                                                            |
| 4        |                            |                                                                            |
| 5        |                            |                                                                            |
| 6        |                            |                                                                            |
| 7        |                            |                                                                            |
| 1'       | 4.61                       | $J_{1',2'} \approx 1.5$                                                    |
| 2'       | 3.69                       | $J_{2',3'ax} = 3.0, J_{2',3'eq} = 3.6$                                     |
| 3'       | 1.75 (ax)<br>1.93 (eq)     | $J_{3'(ax),3'(eq)} = 12.9, J_{3'(ax),4'} = 11.3,$<br>$J_{3'(eq),4'} = 5.3$ |
| 4'       | 3.50                       | $J_{4',5'} = 9.2$                                                          |
| 5'       | 3.59                       | $J_{5',6'} = 6.1$                                                          |
| 6'       | 1.20                       |                                                                            |
| 1''      | 5.45                       | $J_{1'',2''} = 9.0$                                                        |
| 2''      | 3.94                       | $J_{2'',3''} = 9.5$                                                        |
| 3''      | 3.60                       | $J_{3'',4''} = 9$                                                          |
| 4''      | 3.50                       | $J_{4'',5''} = 9$                                                          |
| 5''      | 3.79                       | $J_{5'',6''b} = 6.6$                                                       |
| 6''      | 4.43 (6''a)<br>4.24 (6''b) | $J_{6''a,6''b} = 12$                                                       |
| 2'''     | 7.36                       | $J_{2''',3'''} = 3.6$                                                      |
| 3'''     | 6.50                       |                                                                            |
| 4'''     | 7.53                       | $J_{4''',5'''} = 7.8; J_{4''',6'''} \approx 2$                             |
| 5'''     | 7.06                       | $J_{5''',6'''} = 7.5; J_{5''',7'''} \approx 2$                             |
| 6'''     | 7.15                       | $J_{6''',7'''} = 8.0$                                                      |
| 7'''     | 7.51                       |                                                                            |

**NMR Spectroscopic Data of nuclac#35.**  $^1\text{H}$  (800 MHz), HSQC, and HMBC NMR spectroscopic data were acquired in methanol- $d_4$ . Chemical shifts were referenced to  $(\text{CD}_2\text{HOD}) = 3.31$  ppm and  $(\text{CD}_2\text{HOD}) = 49.00$  ppm. Absolute configuration of the aspartate moiety is proposed by analogy with the known tRNA nucleoside <sup>2</sup>.

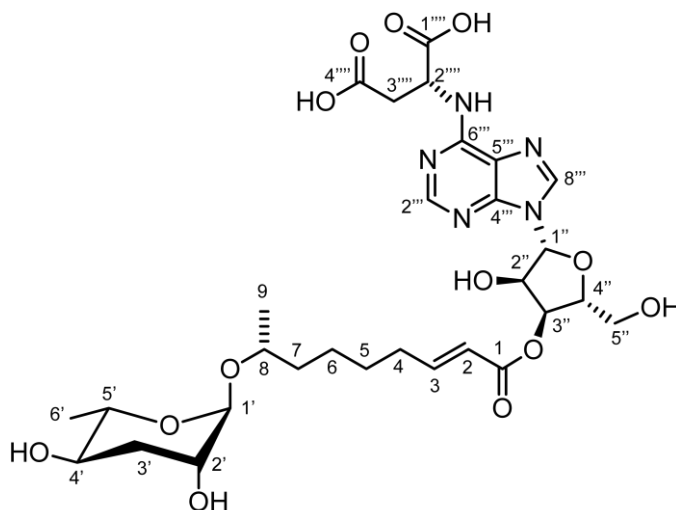

| Position | $^{13}\text{C}$ [ppm] | $^1\text{H}$ [ppm]     | $^1\text{H}, ^1\text{H}$ -coupling constants [Hz]                     | HMBC correlations      |
|----------|-----------------------|------------------------|-----------------------------------------------------------------------|------------------------|
| 1        | 167.2                 | ---                    |                                                                       |                        |
| 2        | 121.5                 | 5.99                   | $J_{2,3} = 15.9$                                                      | C-1, C-4               |
| 3        | 151.8                 | 7.13                   | $J_{3,4} = 7.0$                                                       | C-1, C-4, C-5          |
| 4        | 33.0                  | 2.30                   |                                                                       | C-2, C-3, C-5, C-6     |
| 5        | 28.8                  | 1.54                   |                                                                       |                        |
| 6        | 26.2                  | 1.54 (6a)<br>1.44 (6b) |                                                                       |                        |
| 7        | 37.8                  | 1.59 (7a)<br>1.50 (7b) |                                                                       |                        |
| 8        | 72.2                  | 3.80                   | $J_{8,9} = 6.1$                                                       |                        |
| 9        | 19.1                  | 1.13                   |                                                                       | C-7, C-8               |
| 1'       | 97.3                  | 4.64                   |                                                                       | C-8, C-2', C-3', C-5'  |
| 2'       | 69.7                  | 3.71                   | $J_{2',3'eq} = 2.9$<br>$J_{2',3'ax} = 3.5$                            |                        |
| 3'       | 35.7                  | 1.77 (ax)<br>1.95 (eq) | $J_{3'ax,3'eq} = 13.2$<br>$J_{3'ax,4'} = 11.1$<br>$J_{3'eq,4'} = 5.5$ | C-1', C-2', C-4', C-5' |
| 4'       | 68.0                  | 3.52                   | $J_{4',5'} = 9.8$                                                     | C-6'                   |
| 5'       | 71.0                  | 3.62                   | $J_{5',6'} = 6.2$                                                     |                        |
| 6'       | 17.9                  | 1.21                   |                                                                       | C-4', C-5'             |
| 1''      | 90.6                  | 5.99                   | $J_{1'',2''} = 7.5$                                                   | C-2'', C-4''', C-8'''  |
| 2''      | 73.7                  | 5.00                   | $J_{2'',3''} = 5.3$                                                   |                        |
| 3''      | 74.9                  | 5.44                   | $J_{3'',4''} = 2.5$                                                   | C-1, C-1'', C-5'''     |
| 4''      | 86.0                  | 4.28                   | $J_{4'',5''a} = 3.0$<br>$J_{4'',5''b} = 3.0$                          | C-3''                  |

|             |              |                            |                        |                            |
|-------------|--------------|----------------------------|------------------------|----------------------------|
| 5''         | 63.1         | 3.88 (5''a)<br>3.79 (5''b) | $J_{5''a,5''b} = 13.1$ | C-3'', C-4''               |
| 2'''        | 153.3        | 8.25                       |                        |                            |
| 4'''        | 149.0        | ---                        |                        |                            |
| 5'''        |              | ---                        |                        |                            |
| 6'''        |              | ---                        |                        |                            |
| 8'''        | 141.1        | 8.24                       |                        | C-4'''                     |
| 1''', 4'''' | 176.5, 177.2 | ---                        |                        |                            |
| 2''''       | 52.6         | 4.98                       | $J_{2''',3''''} = 6.2$ |                            |
| 3''''       | 39.7         | 2.94                       |                        | C-1''', C-2''',<br>C-4'''' |

**NMR Spectroscopic Data of nuclas#33.**  $^1\text{H}$  (800 MHz), HSQC, and HMBC NMR spectroscopic data were acquired in methanol- $d_4$ . Chemical shifts were referenced to  $(\text{CD}_2\text{HOD}) = 3.31$  ppm and  $(\text{CD}_2\text{HOD}) = 49.00$  ppm. Absolute configuration of the threonine moiety is proposed by analogy with the known tRNA nucleoside  $t^6\text{A}^3$ .

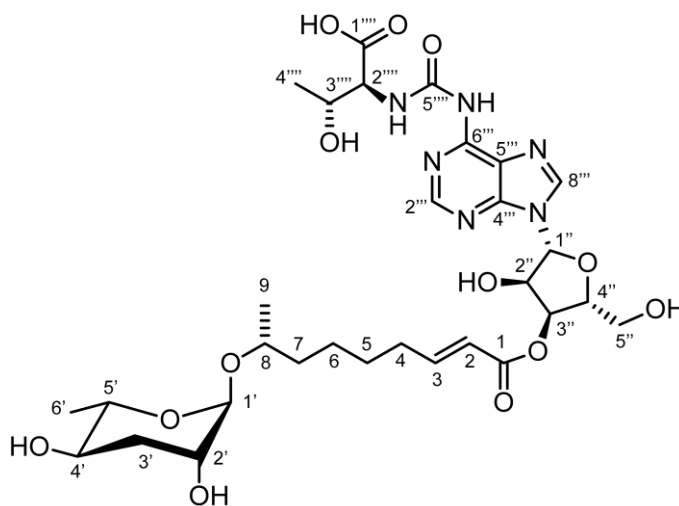

| Position | $^{13}\text{C}$ [ppm] | $^1\text{H}$ [ppm]     | $^1\text{H}, ^1\text{H}$ -coupling constants [Hz] | HMBC correlations  |
|----------|-----------------------|------------------------|---------------------------------------------------|--------------------|
| 1        | 167.1                 | ---                    |                                                   |                    |
| 2        | 121.5                 | 6.01                   | $J_{2,3} = 15.7$                                  | C-1, C-4           |
| 3        | 151.9                 | 7.13                   | $J_{3,4} = 6.8$                                   | C-1, C-4, C-5      |
| 4        | 33.0                  | 2.31                   |                                                   | C-2, C-3, C-5, C-6 |
| 5        | 28.8                  | 1.54                   |                                                   | C-4, C-6, C-7      |
| 6        | 26.2                  | 1.54 (6a)<br>1.45 (6b) |                                                   |                    |
| 7        | 37.9                  | 1.58 (7a)<br>1.50 (7b) |                                                   |                    |

|       |       |                            |                                                                        |                                           |
|-------|-------|----------------------------|------------------------------------------------------------------------|-------------------------------------------|
| 8     | 72.1  | 3.79                       | $J_{8,9} = 6.2$                                                        | C-6, C-7, C-1'                            |
| 9     | 19.0  | 1.13                       |                                                                        | C-7, C-8                                  |
| 1'    | 97.3  | 4.64                       |                                                                        | C-8, C-2', C-3', C-5'                     |
| 2'    | 69.7  | 3.72                       | $J_{2',3'eq} = 2.9$<br>$J_{2',3'ax} = 3.1$                             | C-4'                                      |
| 3'    | 35.7  | 1.77 (ax)<br>1.94 (eq)     | $J_{3'ax,3'eq'} = 13.2$<br>$J_{3'ax,4'} = 11.2$<br>$J_{3'eq,4'} = 5.2$ | C-1', C-2', C-4', C-5'                    |
| 4'    | 68.0  | 3.52                       | $J_{4',5'} = 9.5$                                                      | C-5', C-6'                                |
| 5'    | 71.0  | 3.62                       | $J_{5',6'} = 6.2$                                                      | C-3', C-4'                                |
| 6'    | 17.9  | 1.21                       |                                                                        | C-4', C-5'                                |
| 1''   | 90.3  | 6.10                       | $J_{1'',2''} = 7.0$                                                    | C-2'', C-4''', C-8'''                     |
| 2''   | 74.0  | 5.03                       | $J_{2'',3''} = 5.3$                                                    | C-1''                                     |
| 3''   | 74.5  | 5.45                       | $J_{3'',4''} = 2.7$                                                    | C-1, C-1''                                |
| 4''   | 85.8  | 4.30                       | $J_{4'',5''a} = 3.0$<br>$J_{4'',5''b} = 3.0$                           |                                           |
| 5''   | 62.4  | 3.89 (5''a)<br>3.82 (5''b) | $J_{5''a,5''b} = 12.8$                                                 | C-3'', C-4''                              |
| 2'''  | 152.1 | 8.62                       |                                                                        | C-4''', C-6'''                            |
| 4'''  | 151.1 | ---                        |                                                                        |                                           |
| 5'''  | 121.8 | ---                        |                                                                        |                                           |
| 6'''  | 151.8 | ---                        |                                                                        |                                           |
| 8'''  | 143.3 | 8.51                       |                                                                        | C-4''', C-5'''                            |
| 1'''' | 176.6 | ---                        |                                                                        |                                           |
| 2'''' | 61.3  | 4.37                       | $J_{2''',3'''} = 3.5$                                                  | C-1''''', C-3''''',<br>C-4''''', C-5''''' |
| 3'''' | 68.9  | 4.34                       | $J_{3''',4'''} = 6.5$                                                  |                                           |
| 4'''' | 20.0  | 1.25                       |                                                                        | C-2''''', C-3'''''                        |
| 5'''' | 155.7 | ---                        |                                                                        |                                           |

**NMR Spectroscopic Data of pugl#1.**  $^1\text{H}$  (800 MHz), HSQC, and HMBC NMR spectroscopic data were acquired in methanol- $d_4$ . Chemical shifts were referenced to  $(\text{CD}_2\text{HOD}) = 3.31$  ppm and  $(\text{CD}_2\text{HOD}) = 49.00$  ppm.

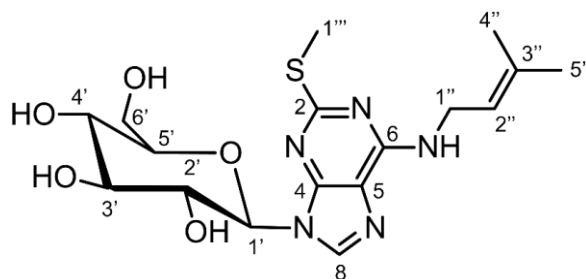

| Position | $^{13}\text{C}$ [ppm] | $^1\text{H}$ [ppm]       | $^1\text{H}, ^1\text{H}$ -coupling constants [Hz]                      | HMBC correlations          |
|----------|-----------------------|--------------------------|------------------------------------------------------------------------|----------------------------|
| 2        | 167.2                 | ---                      |                                                                        |                            |
| 4        | 151.0                 | ---                      |                                                                        |                            |
| 5        | 117.4                 | ---                      |                                                                        |                            |
| 6        | 154.7                 | ---                      |                                                                        |                            |
| 8        | 139.3                 | 8.10                     | $J_{8,1'} \approx 1$                                                   | C-4, C-5, C-6, C-8, C-1'   |
| 1'       | 84.4                  | 5.50                     | $J_{1',2'} = 9.0$                                                      | C-4, C-8, C-2', C-3', C-5' |
| 2'       | 73.0                  | 4.09                     | $J_{2',3'} = 9.6$                                                      | C-1', C-3', C-4,           |
| 3'       | 78.6                  | 3.55                     |                                                                        | C-2', C-4', C-5'           |
| 4'       | 70.8                  | 3.52                     | $J_{4',5'} = 10.0$                                                     | C-3', C-5', C-6'           |
| 5'       | 80.8                  | 3.56                     | $J_{5',6'a} = 6.0$<br>$J_{5',6'b} = 3.0$                               | C-1', C-3', C-4', C-6'     |
| 6'       | 62.2                  | 3.72 (6'a)<br>3.87 (6'b) | $J_{6'a,6'b} = 13.4$                                                   | C-1', C-4', C-5'           |
| 1''      | 39.1                  | 4.17                     | $J_{1'',2''} = 7.0$ $J_{1'',4''} \approx 2$<br>$J_{1'',5''} \approx 2$ |                            |
| 2''      | 121.7                 | 5.37                     | $J_{2'',4''} \approx 2$<br>$J_{2'',5''} \approx 2$                     | C-1'', C-4'', C-5''        |
| 3''      | 136.5                 | ---                      |                                                                        |                            |
| 4''      | 17.9                  | 1.77                     |                                                                        | C-1'', C-2'', C-3'', C-5'' |
| 5''      | 25.7                  | 1.76                     |                                                                        | C-4''                      |
| 1'''     | 14.3                  | 2.56                     |                                                                        | C-2                        |

SUPPORTING FIGURES

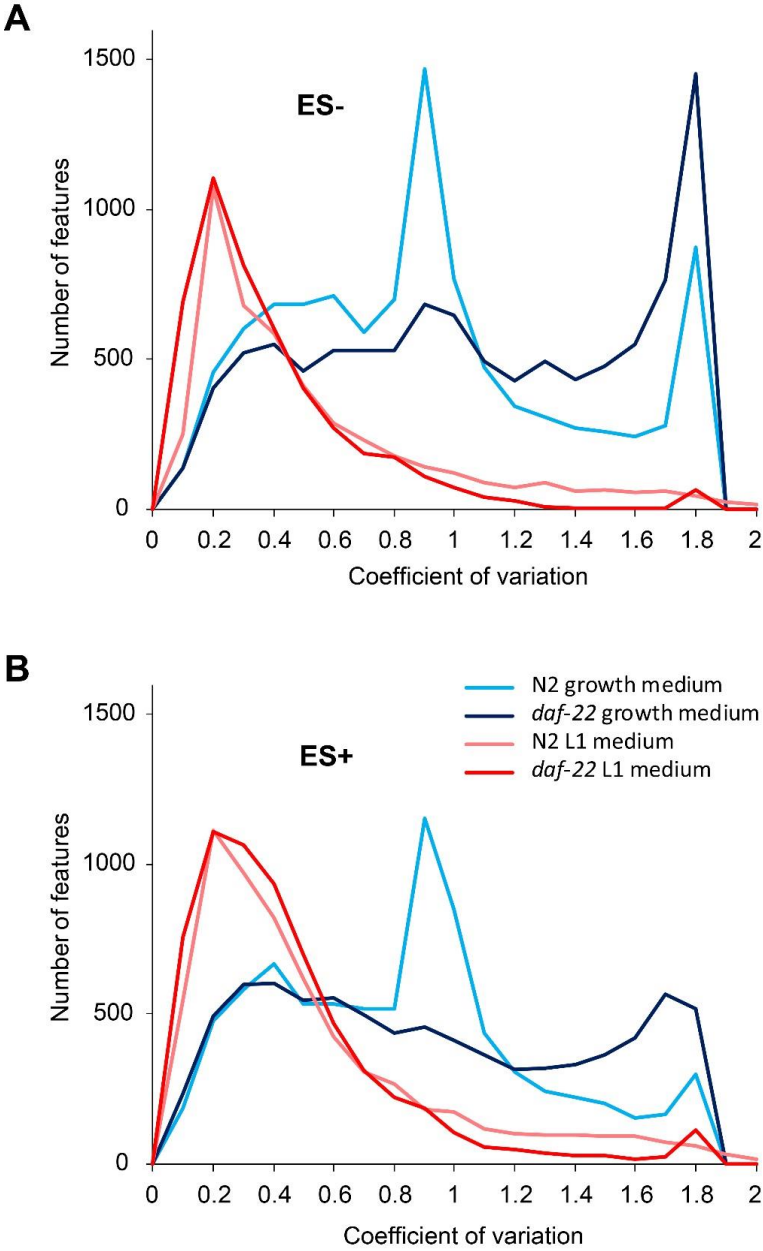

**Figure S1.** *C. elegans* growth medium is more variable than L1 medium. Coefficients of variation (CV) for peak areas were computed for all detected features in negative (A) and positive (B) ionization modes across replicates. Here we plot distributions of CV across all features for N2 and *daf-22* samples, number of bins equals 20. Growth medium samples (blue lines) have higher number of features with larger CV.



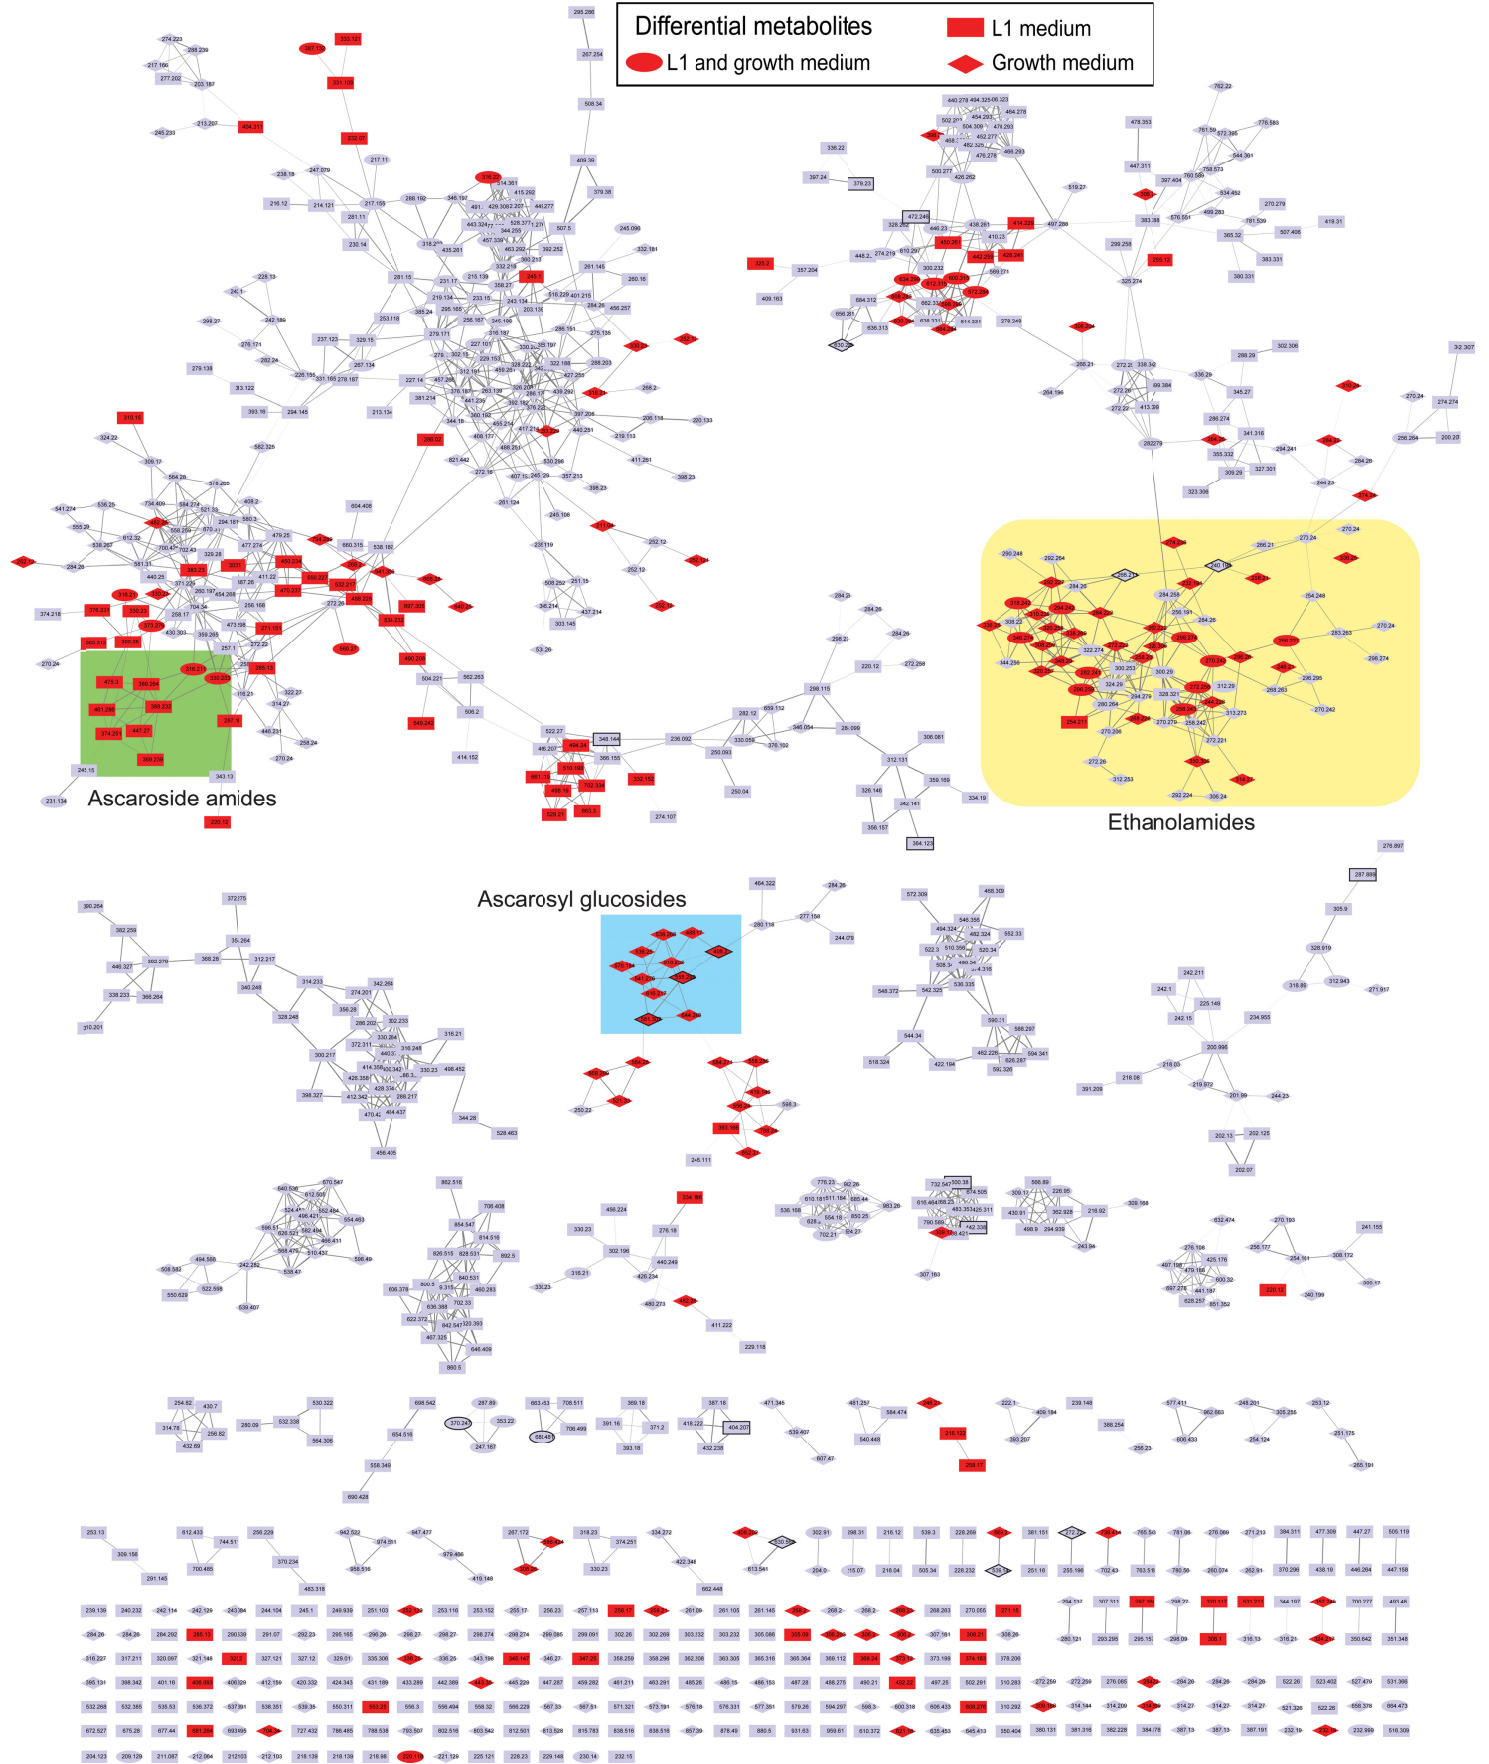

**Figure S2.** Molecular network of *C. elegans daf-22*-dependent features, positive ionization mode. Nodes representing redundant features are marked with black frames. For MS/MS data of *daf-22* dependent features, please refer to Tables S2-S17.

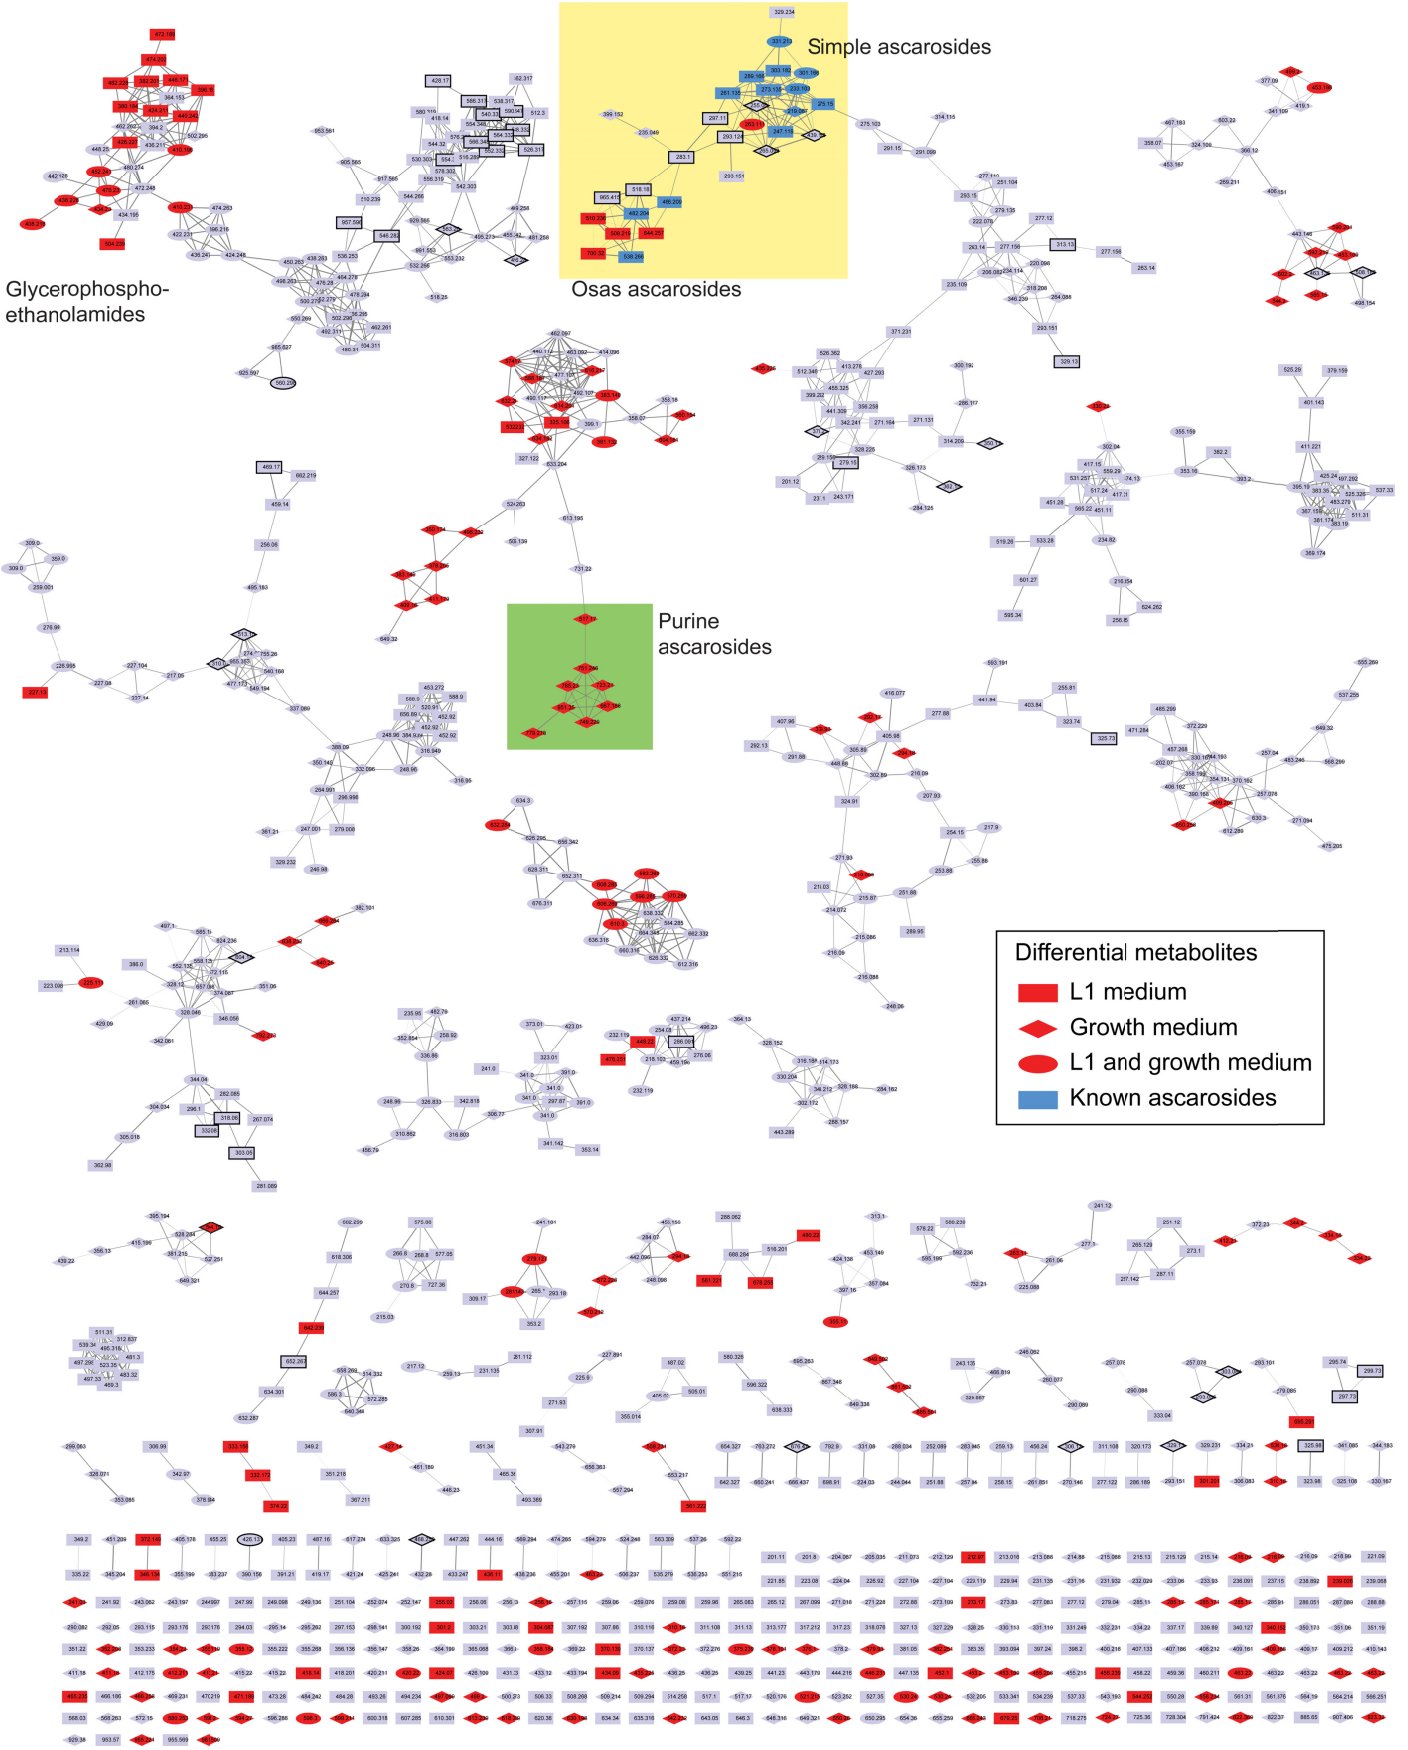

**Figure S3.** Molecular network of *C. elegans daf-22*-dependent features, negative ionization mode. Nodes representing redundant features are marked with black frames. For MS/MS data of *daf-22* dependent features, please refer to Tables S2-S17.

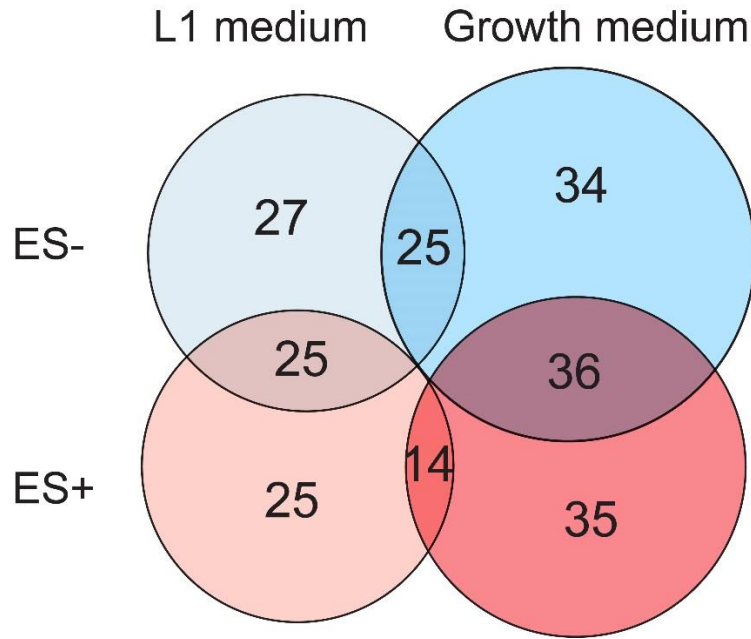

**Figure S4.** Venn diagram highlighting developmental stage specificity of *C. elegans daf-22* dependent metabolites.

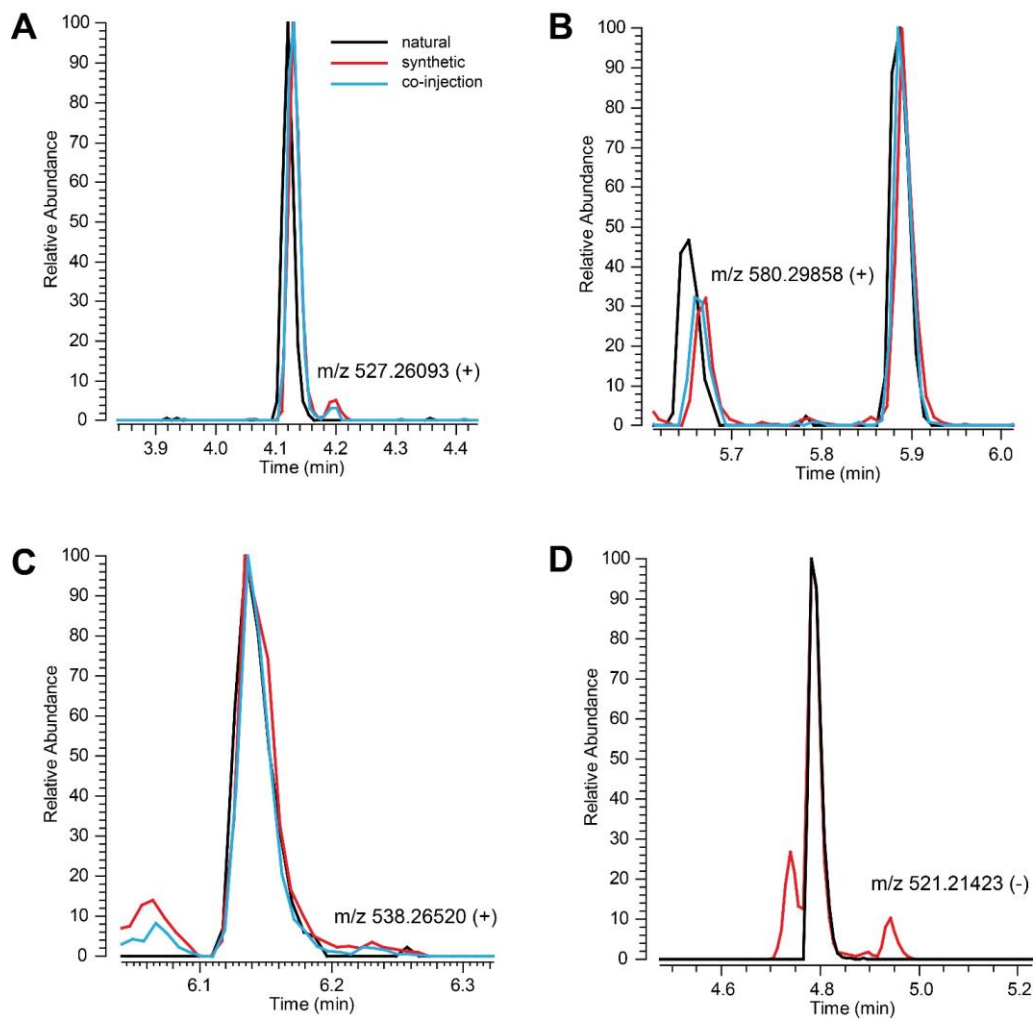

**Figure S5.** EICs of co-injection experiments of synthetic compounds with natural samples. (A) osas#91, (B) nuclas#3, (C) iglas#1, (D) ascr#81.

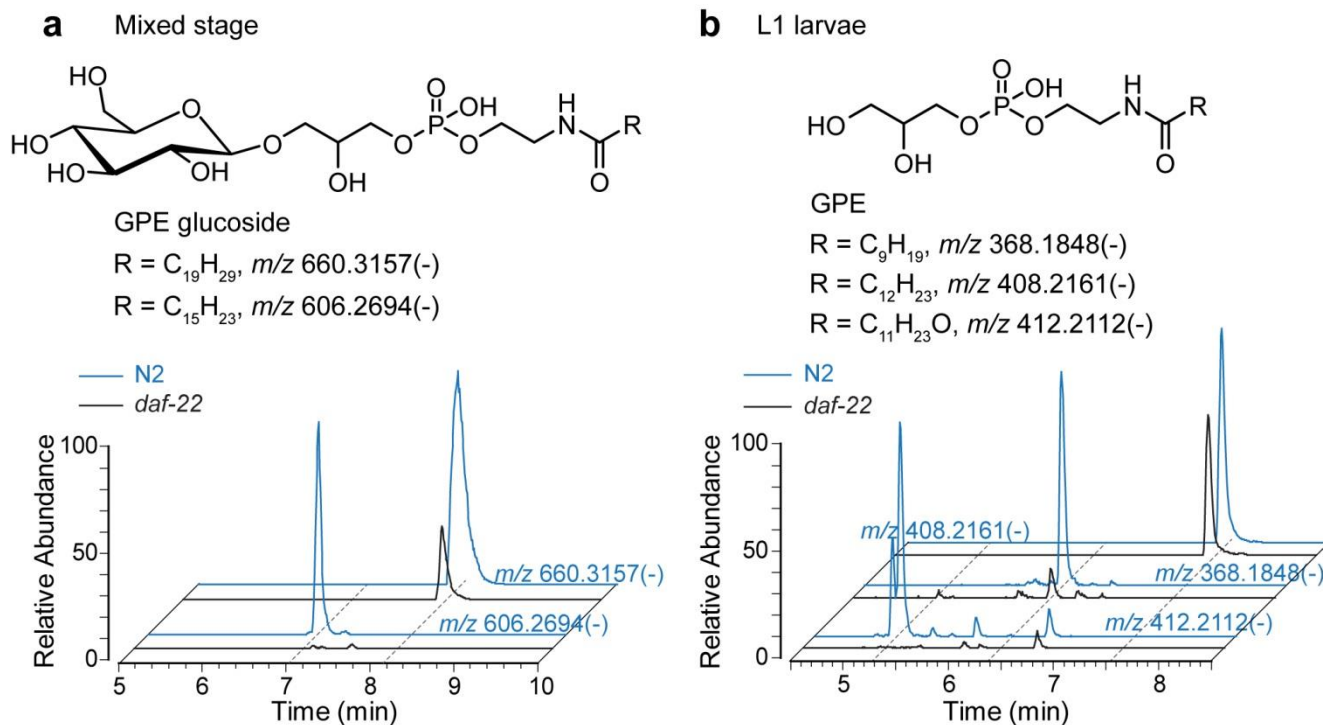

**Figure S6.** a) Levels of different GPE glucosides in growth medium are differently affected by *daf-22* mutation. b) *daf-22* has different effects on various GPEs in L1 medium. The double peak with  $m/z$  412.2112 at 5.3 min is undetectable in *daf-22*,  $m/z$  368.1848 at 6.4 min is significantly reduced compared to wildtype but still present in *daf-22*,  $m/z$  408.2161 at 7.5 min is unchanged in *daf-22*.

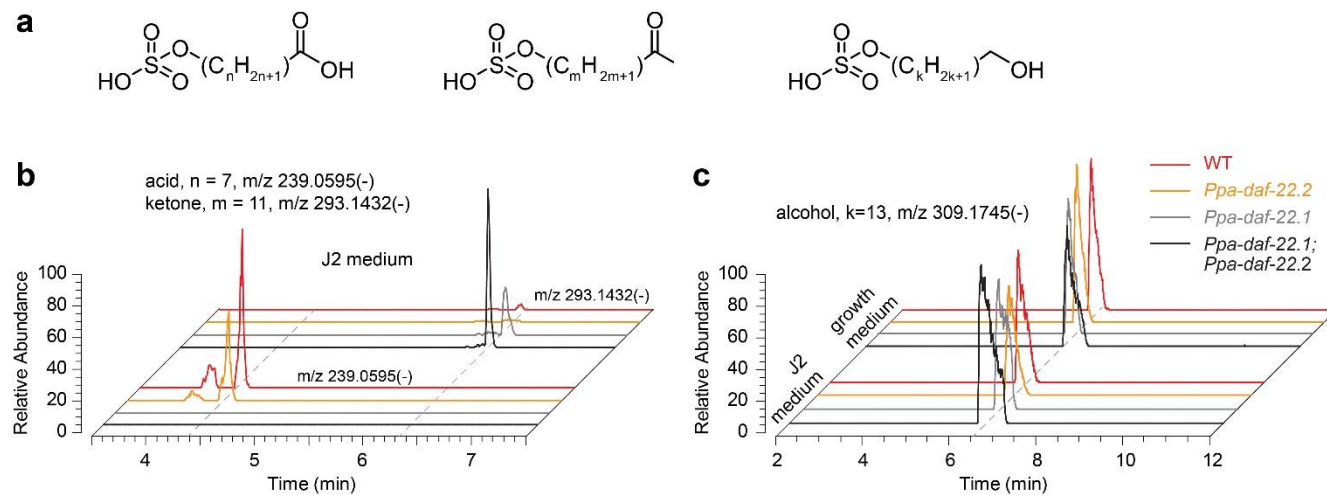

**Figure S7.** a) Generic structures of *daf-22* dependent sulfates in *P. pacificus*. b) EICs (ES-) of two sulfates from *P. pacificus* J2 medium. A medium chain acid ( $m/z$  239.0595) is present in wildtype and *Ppa-daf-22.2* but absent in *Ppa-daf-22.1* and the double mutant. A longer chain putative methylketone ( $m/z$  293.1432) accumulates in the double mutant and *Ppa-daf-22.1*. c) Production of some sulfates is not dependent on *Ppa-daf-22*.

Growth medium, ES-

Growth medium, ES+

L1 medium, ES-

L1 medium, ES+

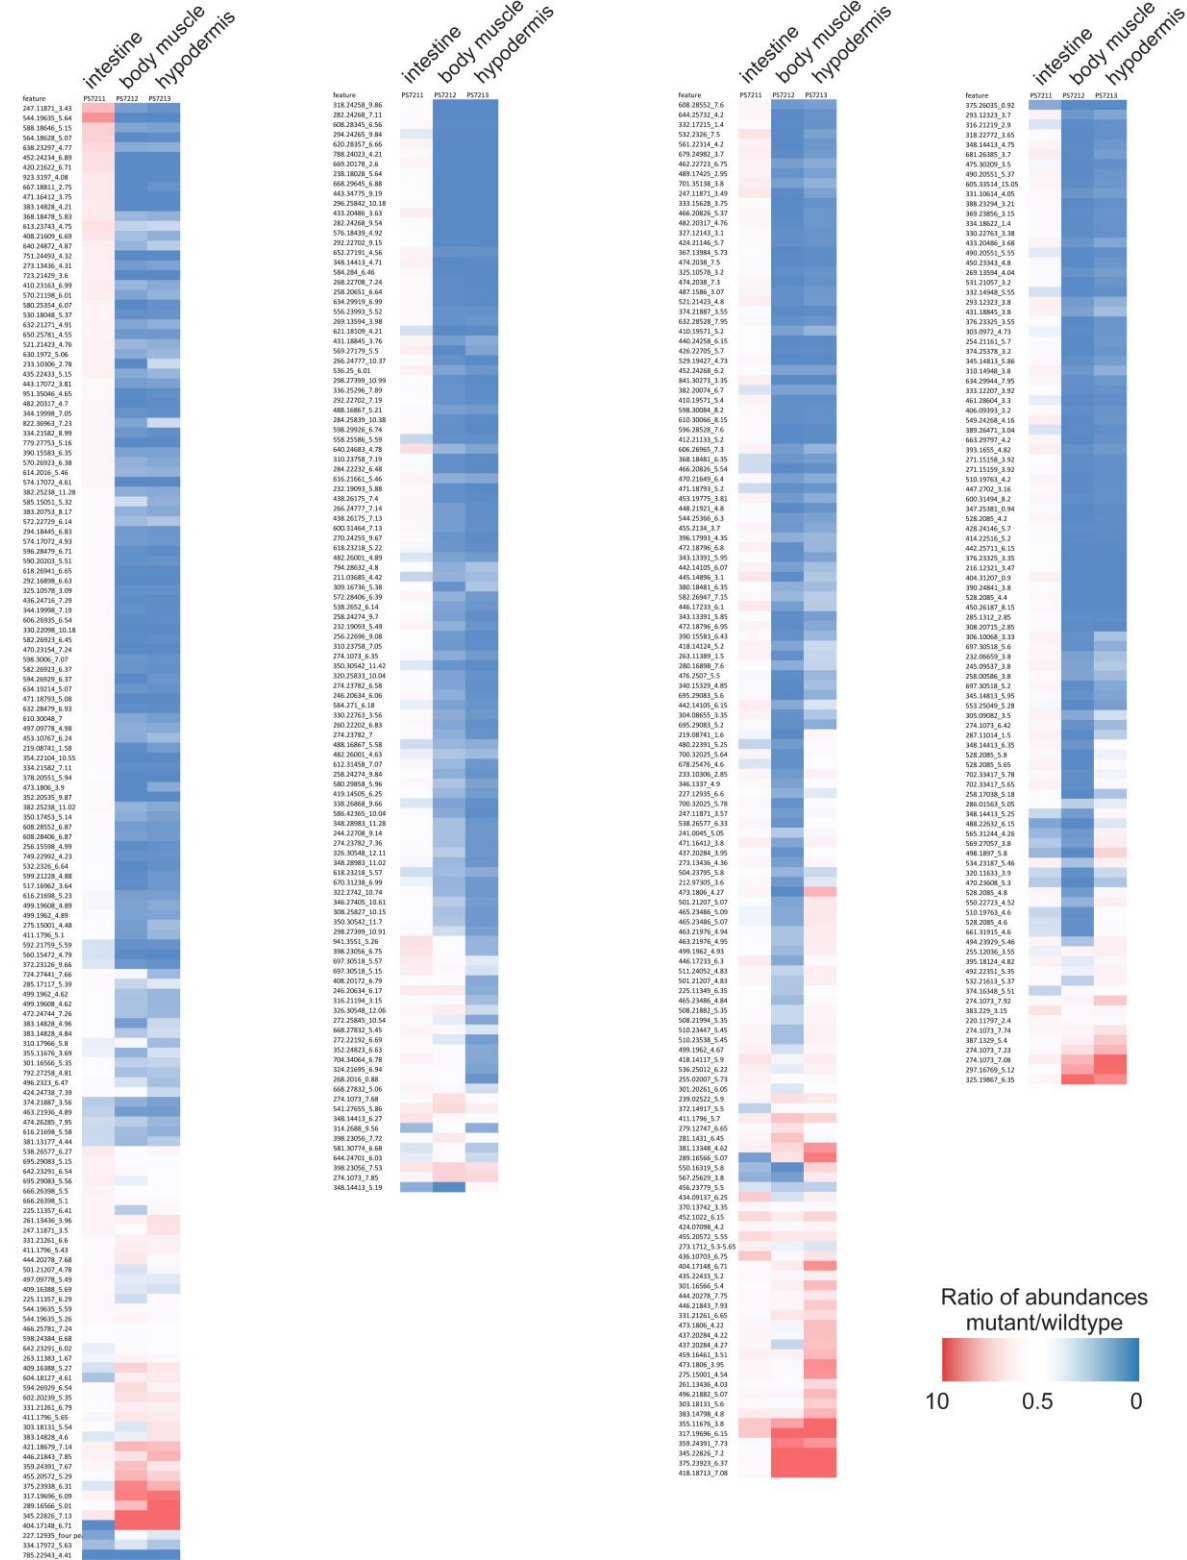

**Figure S8.** Tissue specific *daf-22* rescue in *C. elegans*. Heat maps showing expression of *daf-22*-dependent metabolites in tissue specific rescue lines relative to N2 in growth medium and L1 metabolomes.

## SUPPORTING TABLES

**Table S1. Comparison of feature extraction methods for the *C. elegans* data set.** The data set consisted of 6 MS data files obtained for growth medium samples (3 independent replicates each for wildtype (N2) and *daf-22*), run in the negative ionization mode.

|                                                                                                                                                                            | <b>XCMS profile</b> | <b>XCMS centroid</b> | <b>MS-DIAL</b> |
|----------------------------------------------------------------------------------------------------------------------------------------------------------------------------|---------------------|----------------------|----------------|
| Total number of features.                                                                                                                                                  | 10,350              | 114,675              | 33,956         |
| Number of differential features (down in <i>daf-22</i> ).                                                                                                                  | 759                 | 3,465                | 1,676          |
| Number of verified differential features (down in <i>daf-22</i> ). Isotope and adduct peaks were removed as much as possible at this step. Known ascarosides are included. | 245                 | 325                  | 368            |
| Number of differential features that were analyzed by MS/MS (after manual QC to more carefully remove redundant features). Known ascarosides are excluded.                 | 156                 |                      |                |
| Number of new metabolites (after MS/MS)                                                                                                                                    | 96                  |                      |                |
| Number of detected known ascarosides (out of 19 found by manual analysis).                                                                                                 | 9                   | 16                   | 13             |



**Table S2. Differential metabolites from *C. elegans* L1 medium, ES- mode, that are decreased or absent in *daf-22* medium compared to N2. Peaks that are present but not differential in growth medium are shown in blue. Peaks that are also differential in growth medium are shown in red. Peaks that are also in growth medium table (ES-) are shown in bold red. Manually added entries are shaded pink. Entries that have a corresponding peak in the ES+ table are shaded grey.**

| class     | smid-db | rt (min) | m/z (ES-)        | MS/MS (ES-)                                                                                                                                                                                                             | m/z (ES+)            | MS/MS (ES+)                                                                                                                                                                                                                |
|-----------|---------|----------|------------------|-------------------------------------------------------------------------------------------------------------------------------------------------------------------------------------------------------------------------|----------------------|----------------------------------------------------------------------------------------------------------------------------------------------------------------------------------------------------------------------------|
| ascr      |         | 1.57     | 332.17215        | 73.02831 (C3H5O2-), 86.02363 (C3H4NO2-), 315.14468 (C15H23O7-)                                                                                                                                                          | 334.18622            | 88.03985 (C3H6NO2+), 99.08088 (C6H11O+), 186.11247 (C9H16NO3+), 204.12335 (C9H18NO4+), 218.10239 (C9H16NO5+)                                                                                                               |
| ascr      | bhas#9  | 1.62     | <b>263.11389</b> | 59.01257 (C2H3O2-), 73.02821 (C3H5O2-), 115.03921 (C5H7O3-), 245.10316 (C11H17O6-)                                                                                                                                      | 287.11014            | 157.04724 (C5H10NaO4+)                                                                                                                                                                                                     |
|           |         | 2.19     | <b>249.09825</b> |                                                                                                                                                                                                                         |                      |                                                                                                                                                                                                                            |
| S         |         | 3.43     | 304.08655        | 63.96117 (SO2-), 74.00575 (C2H4NS-), 84.04430 (C4H6NO-), 113.04218 (C6H9S-), 116.01672 (C4H6NSO-), 128.03465 (C5H6NO3-), 175.04337 (C7H11SO3-), 178.01790 (C5H8NSO4-)                                                   | 306.10068            | 84.04497 (C4H6NO+), 88.03983 (C3H6NO2+), 130.04997 (C5H8NO3+)                                                                                                                                                              |
|           |         | 3.44     | <b>291.14526</b> |                                                                                                                                                                                                                         |                      |                                                                                                                                                                                                                            |
| ascr/osas | osas#13 | 3.46     | 841.30273        | 78.95785 (PO3-), 96.96857 (H2PO4-), 152.99545 (C3H6PO5-), 171.00627 (C3H8PO6-), 444.16269 (C16H31NPO11-)                                                                                                                | 843.31723            | 126.09169 (C7H12NO+), 144.10194 (C7H14NO2+)                                                                                                                                                                                |
|           |         | 3.63     | 212.97305        | 69.03333 (C4H5O-), 97.02843 (C5H5O2-), 113.02338 (C5H5O3-), 133.00554 (C5H6ClO2-), 141.01881 (C6H5O4-), 176.99593 (C6H6ClO4-)                                                                                           |                      |                                                                                                                                                                                                                            |
| ascr      |         | 3.66     | <b>374.21887</b> | 73.02828 (C3H5O2-), 128.07094 (C6H10NO2-), 357.19171 (C18H29O7-)                                                                                                                                                        | 376.23325            | 99.08086 (C6H11O+), 130.08635 (C6H12NO2+), 246.16989 (C12H24NO4+)                                                                                                                                                          |
| ascr/osas | osas#92 | 3.83     | 679.24982        | 78.95792 (PO3-), 96.96864 (H2PO4-), 152.99548 (C3H6PO5-), 171.00626 (C3H8PO6-), 214.04912 (C5H13NPO6-), 234.07750 (C12H12NO4-), 370.12827 (C13H25NPO9-), 444.16376 (C16H31NPO11-), 661.23810 (C28H42N2PO14-)            | 681.26385            | 83.04975 (C5H7O+), 126.09148 (C7H12NO+), 136.07576 (C8H10NO+), 144.10199 (C7H14NO2+), 236.09113 (C12H14NO4+), 316.11551 (C10H23NPO8+)                                                                                      |
| ascr      |         | 3.83     | 333.15628        | 73.02825 (C3H5O2-), 87.00761 (C3H3O3-), 315.14514 (C15H23O7-)                                                                                                                                                           |                      |                                                                                                                                                                                                                            |
| ascr/osas | osas#15 | 3.94     | 567.25629        | 73.02833 (C3H5O2-), 86.02363 (C3H4NO2-), 159.06607 (C7H11O4-), 315.14529 (C15H23O7-), 332.17200 (C15H26NO7-)                                                                                                            | 569.27057            | 95.04970 (C6H7O+), 99.08087 (C6H11O+), 119.04942 (C8H7O+), 136.07573 (C8H10NO2+), 218.08138 (C12H12NO3+), 236.09196 (C12H14NO4+), 348.14420 (C18H22NO6+)                                                                   |
| ascr/osas | osas#91 | 4.29     | 561.22314        | 73.02827 (C3H5O2-), 98.02370 (C4H4NO2-), 99.00785 (C4H3O3-), 107.04919 (C7H7O-), 119.04951 (C8H7O-), 135.04468 (C8H7O2-), 160.09793 (C7H14NO3-), 216.06636 (C12H10NO3-), 234.07727 (C12H12NO4-), 290.16089 (C13H24NO6-) | 549.24268            | 62.06076 (C2H8NO+), 144.10199 (C7H14NO2+), 166.08386 (C7H13NaNO2+), 176.06816 (C8H11NaNO2+), 184.09436 (C7H15NaNO3+), 212.08916 (C8H15NaNO4+), 226.10486 (C9H17NaNO4+), 276.08420 (C12H15NaNO5+), 296.14679 (C13H23NaNO5+) |
| GPE       |         | 4.32     | 424.07098        | 78.95785 (PO3-), 96.96861 (H2PO4-), 152.99554 (C3H6PO5-), 171.00618 (C3H8PO6-), 278.08017 (C10H17NPO6-), 314.05753 (C10H18CINPO6-), 352.11713 (C13H23NPO8-), 388.09390 (C13H24CINPO8-)                                  |                      |                                                                                                                                                                                                                            |
| ascr/osas |         | 4.32     | 644.25732        | 73.02825 (C3H5O2-), 93.03352 (C6H5O-), 98.02369 (C4H4NO2-), 99.04407 (C5H7O2-), 107.04926 (C7H7O-), 119.04942 (C8H7O-), 135.04453 (C8H7O2-), 190.08771 (C11H12NO2-),                                                    | 528.20850, 510.19763 | 101.02370 (C4H5O3+), 119.04937 (C8H7O+), 136.07573 (C8H10NO+), 172.07581 (C11H10NO+), 190.12263 (C12H16NO+),                                                                                                               |

|           |           |      |           |                                                                                                                                                                                                                                                                                   |           |                                                                                                                                                                                                         |
|-----------|-----------|------|-----------|-----------------------------------------------------------------------------------------------------------------------------------------------------------------------------------------------------------------------------------------------------------------------------------|-----------|---------------------------------------------------------------------------------------------------------------------------------------------------------------------------------------------------------|
|           |           |      |           | 216.06660 (C12H10NO3-), 234.07715 (C12H12NO4-), 247.11862 (ascr#9), 482.20258 (C23H32NO10-, osas#9)                                                                                                                                                                               |           | 200.07111 (C12H10NO2+), 218.08116 (C12H12NO3+), 236.09163 (C12H14NO4+), 290.13840 (C16H20NO4+), 348.14407 (C18H22NO6+)                                                                                  |
| ascr/osas | glosas#91 | 4.50 | 644.25732 | 73.02825 (C3H5O2-), 93.03352 (C6H5O-), 98.02369 (C4H4NO2-), 99.04407 (C5H7O2-), 107.04926 (C7H7O-), 119.04942 (C8H7O-), 133.02867 (C8H5O2-) 190.08771 (C11H12NO2-), 216.06660 (C12H10NO3-), 247.11862 (ascr#9), 464.19177 (C23H30NO9-)                                            | 528.20850 |                                                                                                                                                                                                         |
| GPE       |           | 4.44 | 396.17993 | 78.95783 (PO3-), 96.96854 (H2PO4-), 152.99551 (C3H6PO5-), 171.00624 (C3H8PO6-), 322.14288 (C13H25NPO6-)                                                                                                                                                                           | 398.19443 | 208.16960 (C13H22NO+), 226.18005 (C13H24NO2+)                                                                                                                                                           |
| ascr/osas | glosas#2  | 4.67 | 678.25476 | 98.02370 (C4H4NO2-), 119.04943 (C8H7O-), 135.04457 (C8H7O2-), 216.06665 (C12H10NO3-), 234.07722 (C12H12NO4-)                                                                                                                                                                      | 661.31915 | 136.07571 (C8H10NO+), 218.08122 (C12H12NO3+), 236.09161 (C12H14NO4+), 348.14410 (C18H22NO6+), 510.19757 (C24H32NO11+)                                                                                   |
| ascr/osas | glosas#21 | 4.87 | 678.25476 | 216.06665 (C12H10NO3-), 234.07722 (C12H12NO4-)                                                                                                                                                                                                                                    |           |                                                                                                                                                                                                         |
| ascr      | hbas#13   | 4.73 | 529.19427 | 73.02820 (C3H5O2-), 93.03349 (C6H5O-), 137.02362 (C7H5O3-), 367.13962 (C18H23O8-)                                                                                                                                                                                                 |           |                                                                                                                                                                                                         |
|           |           | 4.58 | 319.17623 |                                                                                                                                                                                                                                                                                   |           |                                                                                                                                                                                                         |
| ascr      |           | 4.88 | 383.14798 | 78.95792 (PO3-)                                                                                                                                                                                                                                                                   |           |                                                                                                                                                                                                         |
|           |           | 4.90 | 448.21921 | 71.01270 (C3H3O2-), 73.02835 (C3H5O2-), 85.02843 (C4H5O2-), 88.03938 (C3H6NO2-), 99.04420 (C5H7O2-), 127.03946 (C6H7O3-), 146.08189 (C6H12NO3-), 301.12952 (C14H21O7-)                                                                                                            | 450.23343 |                                                                                                                                                                                                         |
| GPE       |           | 4.92 | 340.15329 | 78.95784 (PO3-), 96.96854 (H2PO4-), 152.99551 (C3H6PO5-), 171.00624 (C3H8PO6-), 266.11627 (C10H21NPO5-)                                                                                                                                                                           |           |                                                                                                                                                                                                         |
| ascr      | ascr#81   | 4.94 | 521.21423 | 73.02827 (C3H5O2-), 92.04945 (C6H6N-), 128.03458 (C5H6NO3-), 135.05571 (C7H7N2O-), 136.03976 (C7H6NO2-), 161.07162 (C9H9N2O-), 177.10316 (C10H13N2O-), 203.08263 (C11H11N2O2-), 221.09315 (C11H13N2O3-), 392.17169 (C20H26NO7-), 477.22397 (C24H33N2O8-), 503.20401 (C25H31N2O9-) | 393.16550 | 109.06512 (C7H9O+), 120.04458 (C7H6NO+), 246.11237 (C14H16NO3+)                                                                                                                                         |
| S         |           | 5.00 | 346.13370 | 63.96117 (SO2-), 73.98494 (C2H2SO-), 84.04433 (C4H6NO-), 99.98527 (C3H2NSO-), 115.00900 (C4H5NSO-), 160.00723 (C5H6NSO3-), 177.01007 (C5H7NSO4-), 185.11824 (C10H17O3-)                                                                                                           | 348.14753 | 74.00657 (C2H4NS+), 92.01695 (C2H6NSO+), 120.01160 (C3H6NSO2+), 120.99564 (C3H5SO3+), 138.02191 (C3H8NSO3+), 151.11176 (C10H15O+), 162.02190 (C5H8NSO3+), 169.12224 (C10H17O2+), 180.03244 (C5H10NSO4+) |
| ascr      |           | 5.07 | 463.21976 | 59.01261 (C2H3O2-), 71.01261 (C3H3O2-), 73.02829 (C3H5O2-), 85.02836 (C4H5O2-), 101.02341 (C4H5O3-), 113.02342 (C5H5O3-)                                                                                                                                                          |           |                                                                                                                                                                                                         |
|           |           | 5.11 | 241.00450 | 125.06013 (C7H9O2-), 137.00140 (C4H6ClO3-), 157.00751 (C7H6ClO2-), 161.03720 (C7H10ClO2-), 169.05045 (C8H9O4-), 205.02727 (C8H10ClO4-)                                                                                                                                            |           |                                                                                                                                                                                                         |
| ascr      |           | 5.22 | 465.23486 | 59.01256 (C2H3O2-), 71.01261 (C3H3O2-), 73.02828 (C3H5O2-), 85.02850 (C4H5O2-), 89.02345 (C3H5O3-), 101.02354 (C4H5O3-), 113.02370 (C5H5O3-), 155.10762 (C9H15O2-), 173.11816 (C9H17O3-), 303.18134 (C15H27O6-, ascr#10)                                                          |           |                                                                                                                                                                                                         |
| GPE       |           | 5.25 | 418.14124 | 78.95785 (PO3-), 96.96861 (H2PO4-), 152.99548 (C3H6PO5-), 171.00623 (C3H8PO6-), 214.04825 (C5H13NPO6-),                                                                                                                                                                           |           |                                                                                                                                                                                                         |

|           |               |      |           |                                                                                                                                                                                                                                                                         |                      |                                                                                                                                      |
|-----------|---------------|------|-----------|-------------------------------------------------------------------------------------------------------------------------------------------------------------------------------------------------------------------------------------------------------------------------|----------------------|--------------------------------------------------------------------------------------------------------------------------------------|
|           |               |      |           | 308.12650 (C12H23NPO6-), 382.16367 (C15H29NPO8-)                                                                                                                                                                                                                        |                      |                                                                                                                                      |
|           |               | 5.26 | 471.18793 |                                                                                                                                                                                                                                                                         | 490.22928            | 197.08083 (C10H13O4+), 293.13824 (C16H21O5+)                                                                                         |
| GPE       |               | 5.33 | 412.21133 | 78.95782 (PO3-), 96.96856 (H2PO4-), 152.99547 (C3H6PO5-), 171.00623 (C3H8PO6-), 338.17395 (C14H29NPO6-)                                                                                                                                                                 | 414.22583            | 98.06045 (C5H8NO+), 224.20087 (C14H26NO+), 242.21132 (C14H28NO2+)                                                                    |
| GPE       |               | 5.49 | 410.19571 | 78.95782 (PO3-), 96.96856 (H2PO4-), 152.99547 (C3H6PO5-), 171.00623 (C3H8PO6-)                                                                                                                                                                                          |                      |                                                                                                                                      |
| ascr/osas | osas#7        | 5.49 | 508.21994 | 73.02835 (C3H5O2-), 98.02373 (C4H4NO2-), 119.04948 (C8H7O-), 135.04462 (C8H7O2-), 216.06659 (C12H10NO3-), 234.07704 (C12H12NO4-), 273.13449 (C13H21O6-, ascr#7)                                                                                                         | 532.21613            | 176.06828 (C8H11NaNO2+), 276.08411 (C12H15NaNO5+), 388.13699 (C18H23NaNO7+)                                                          |
|           |               | 5.56 | 273.17120 | 59.01261 (C2H3O2-), 115.03916 (C5H7O3-), 139.11215 (C9H15O-)                                                                                                                                                                                                            |                      |                                                                                                                                      |
| ascr/osas | osas#1        | 5.57 | 510.23538 | 73.02824 (C3H5O2-), 82.02866 (C4H4NO-), 98.02371 (C4H4NO2-), 99.00780 (C4H3O3-), 119.04945 (C8H7O-), 121.02873 (C7H5O2-), 123.04453 (C7H7O2-), 127.07574 (C7H11O2-), 133.02895 (C8H5O2-), 216.06650 (C12H10NO3-), 234.07719 (C12H12NO4-), 275.14993 (C13H23O6-, ascr#1) | 534.23187            | 176.06828 (C8H11NaNO2+), 276.08411 (C12H15NaNO5+), 388.13699 (C18H23NaNO7+)                                                          |
| GPE       |               | 5.59 | 456.23779 | 78.95782 (PO3-), 96.96854 (H2PO4-), 152.99553 (C3H6PO5-), 171.00627 (C3H8PO6-), 214.04861 (C5H13NPO6-)                                                                                                                                                                  | 458.25229            | 86.06060 (C4H8NO+), 268.22699 (C16H30NO2+), 286.23755 (C16H32NO3+)                                                                   |
|           |               | 5.61 | 476.25070 | 71.01267 (C3H3O2-), 99.04410 (C5H7O2-), 127.07557 (C7H11O2-), 146.08179 (C6H12NO3-), 275.15018 (C13H23O6-), 329.16028 (C16H25O7-)                                                                                                                                       | 478.26520            | 90.05545 (C3H8NO2+), 184.09676 (C9H14NO3+), 202.10744 (C9H16NO4+), 220.11797 (C9H18NO5+), 332.17029 (C15H26NO7+)                     |
| S         |               | 5.64 | 372.14917 | 63.96117 (SO2-), 73.98197 (C2H2SO-), 84.04438 (C4H6NO-), 99.98528 (C3H2NSO-), 115.00896 (C4H5NSO-), 160.00719 (C5H6NSO3-), 177.01004 (C5H7NSO4-), 211.13400 (C12H19O3-)                                                                                                 | 374.16348            | 74.00655 (C2H4NS+), 120.01163 (C3H6NSO2+), 138.02196 (C3H8NSO3+), 162.02196 (C5H8NSO3+), 180.03249 (C5H10NSO4+)                      |
| ascr      | nuclas#33, 34 | 5.75 | 695.29083 | 72.00783 (C2H2NO2-), 74.02348 (C2H4NO2-), 100.00296 (C3H2NO3-), 118.05013 (C4H8NO3-), 160.02628 (C6H2N5O-)                                                                                                                                                              | 697.30518            | 136.06183 (C5H6NS+), 162.04111 (C6H4NSO+), 281.09924 (C10H13N6O4+), 287.14908 (C14H23O6+)                                            |
| GPE       |               | 5.78 | 424.21146 | 78.95782 (PO3-), 96.96854 (H2PO4-), 152.99553 (C3H6PO5-), 171.00633 (C3H8PO6-), 350.17386 (C15H29NPO6-)                                                                                                                                                                 | 426.22596            | 254.21124 (C15H28NO2+)                                                                                                               |
|           |               | 5.79 | 255.02007 | 139.07593 (C8H11O2-), 151.01729 (C5H8ClO3-), 175.05299 (C8H12ClO2-), 219.04298 (C9H12ClO4-)                                                                                                                                                                             |                      |                                                                                                                                      |
| GPE       |               | 5.80 | 426.22705 | 78.95780 (PO3-), 96.96851 (H2PO4-), 152.99542 (C3H6PO5-), 171.00615 (C3H8PO6-), 352.18945 (C15H31NPO6-)                                                                                                                                                                 | 428.24146            | 256.22733 (C15H30NO2+)                                                                                                               |
| ascr/osas | glosas#10     | 5.78 | 700.32025 | 73.02825 (C3H5O2-), 82.02863 (C4H4NO2-), 123.04437 (C7H7O2-), 133.02884 (C8H5O2-), 155.10735 (C9H15O2-), 173.11801 (C9H17O3-), 216.06662 (C12H10NO3-), 303.18134 (C15H27O6-, ascr#10), 520.25446 (C27H38NO9-)                                                           | 528.20850, 510.19763 | 72.08144 (C4H10N+), 119.04937 (C8H7O+), 136.07570 (C8H10NO+), 218.08116 (C12H12NO3+), 236.09167 (C12H14NO4+), 348.14368 (C18H22NO6+) |
| ascr/osas | glosas#101    | 5.92 | 700.32025 | 73.02825 (C3H5O2-), 82.02863 (C4H4NO2-), 123.04437 (C7H7O2-), 133.02884 (C8H5O2-), 155.10735 (C9H15O2-), 173.11801 (C9H17O3-), 216.06662 (C12H10NO3-), 303.18134 (C15H27O6-, ascr#10), 520.25446 (C27H38NO9-)                                                           | 528.20850            |                                                                                                                                      |
| GPE       |               | 5.87 | 504.23795 | 78.95781 (PO3-), 96.96851 (H2PO4-), 140.01126 (C2H7NPO4-), 152.99548 (C3H6PO5-), 171.00618 (C3H8PO6-), 214.04874 (C5H13NPO6-)                                                                                                                                           | 506.25245            | 334.23740 (C20H32NO3+)                                                                                                               |
| ascr/osas | osas#22       | 5.89 | 550.16319 | 98.02370 (C4H4NO2-), 99.00771 (C4H3O3-), 119.04945 (C8H7O-),                                                                                                                                                                                                            | 498.18970            | 136.07576 (C8H10NO+), 218.08125 (C12H12NO3+),                                                                                        |

|         |  |      |           |                                                                                                                                                                                                                                 |           |                                                                                                                                                                                                                                         |
|---------|--|------|-----------|---------------------------------------------------------------------------------------------------------------------------------------------------------------------------------------------------------------------------------|-----------|-----------------------------------------------------------------------------------------------------------------------------------------------------------------------------------------------------------------------------------------|
|         |  |      |           | 121.02872 (C7H5O2-); 135.04451 (C8H7O2-), 190.08725 (C11H12NO2-); 216.06657 (C12H10NO3-), 234.07710 (C12H12NO4-)                                                                                                                |           | 236.09166 (C12H14NO4+), 348.14420 (C18H22NO6+),                                                                                                                                                                                         |
|         |  | 5.93 | 239.02522 |                                                                                                                                                                                                                                 |           |                                                                                                                                                                                                                                         |
| S       |  | 6.06 | 343.13391 |                                                                                                                                                                                                                                 | 345.14813 | 58.99575 (C2H3S+), 104.01679 (C3H6NSO+), 116.01688 (C4H6NSO+), 140.05286 (C7H10NS+), 168.04774 (C8H10NSO+), 172.07903 (C8H14NSO+), 196.04274 (C9H10NSO2+), 281.13171 (C14H21N2SO2+), 299.14227 (C14H23N2SO3+), 327.13712 (C15H23N2SO4+) |
| GPE     |  | 6.11 | 442.14105 | 78.95782 (PO3-), 96.96853 (H2PO4-), 140.01122 (C2H7NPO4-), 152.99548 (C3H6PO5-), 171.00616 (C3H8PO6-), 214.04875 (C5H13NPO6-), 388.15372 (C17H27NPO7-), 406.16357 (C17H29NPO8-)                                                 | 444.15555 | 272.14105 (C14H23O2NCI+)                                                                                                                                                                                                                |
|         |  | 6.18 | 301.20261 | 99.08054 (C6H11O-), 139.11227 (C9H15O-), 143.07088 (C7H11O3-), 183.10243 (C10H15O3-), 201.11340 (C10H17O4-)                                                                                                                     |           |                                                                                                                                                                                                                                         |
| GPE     |  | 6.20 | 452.10220 | 78.95783 (PO3-), 96.96857 (H2PO4-), 140.01120 (C2H7NPO4-), 152.99547 (C3H6PO5-), 171.00627 (C3H8PO6-), 214.04877 (C5H13NPO6-), 380.14795 (C15H27NPO8-), 416.12509 (C15H28CINPO8-)                                               |           |                                                                                                                                                                                                                                         |
| GPE     |  | 6.21 | 452.24268 | 78.95781 (PO3-), 96.96851 (H2PO4-), 152.99544 (C3H6PO5-), 171.00615 (C3H8PO6-)                                                                                                                                                  | 454.25718 | 282.24265 (C17H32NO2+)                                                                                                                                                                                                                  |
| GPE     |  | 6.22 | 440.24258 | 78.95781 (PO3-), 96.96853 (H2PO4-), 152.99544 (C3H6PO5-), 171.00618 (C3H8PO6-), 366.20477 (C16H33NPO6-)                                                                                                                         | 442.25708 | 98.06040 (C5H8NO+), 252.23201 (C16H30NO+), 270.24255 (C16H32NO2+)                                                                                                                                                                       |
| GPE     |  | 6.23 | 446.17233 | 78.95784 (PO3-), 96.96852 (H2PO4-), 152.99541 (C3H6PO5-), 171.00616 (C3H8PO6-), 336.15781 (C14H27NPO6-), 410.19498 (C17H33NPO8-)                                                                                                |           |                                                                                                                                                                                                                                         |
| GPE     |  | 6.28 | 434.09137 | 78.95788 (PO3-), 152.99577 (C3H6PO5-), 171.00594 (C3H8PO6-), 362.13797 (C15H25NPO7-), 398.11340 (C15H26CINPO7-)                                                                                                                 |           |                                                                                                                                                                                                                                         |
| GPE     |  | 6.35 | 544.25366 | 59.01267 (C2H3O2-), 71.01264 (C3H3O2-), 78.95789 (PO3-), 85.02838 (C4H5O2-), 89.02330 (C3H5O3-), 96.96855 (H2PO4-), 101.02345 (C4H5O3-), 113.02343 (C5H5O3-), 119.03423 (C4H7O4-), 152.99577 (C3H6PO5-), 333.05933 (C9H18PO11-) | 546.26816 | 212.20088 (C13H26NO+)                                                                                                                                                                                                                   |
| GPE     |  | 6.41 | 368.18481 | 78.95782 (PO3-), 96.96851 (H2PO4-), 152.99545 (C3H6PO5-), 171.00621 (C3H8PO6-), 294.14777 (C12H25NPO5-)                                                                                                                         | 370.19931 | 198.18527 (C12H24NO+)                                                                                                                                                                                                                   |
| sulfate |  | 6.42 | 281.14310 | 96.95911 (HSO4-)                                                                                                                                                                                                                |           |                                                                                                                                                                                                                                         |
| GPE     |  | 6.43 | 380.18481 | 78.95786 (PO3-), 96.96860 (H2PO4-), 152.99556 (C3H6PO5-), 171.00627 (C3H8PO6-), 306.14774 (C13H25NPO5-)                                                                                                                         | 382.19931 | 210.18518 (C13H24NO+)                                                                                                                                                                                                                   |
|         |  | 6.45 | 225.11349 | 163.11259 (C11H15O-), 181.12340 (C11H17O2-)                                                                                                                                                                                     |           |                                                                                                                                                                                                                                         |
|         |  | 6.46 | 470.21649 | 78.95783 (PO3-), 96.96856 (H2PO4-), 259.02261 (C6H12PO9-), 308.16348 (C13H27NPO5-)                                                                                                                                              |           |                                                                                                                                                                                                                                         |
| sulfate |  | 6.59 | 279.12747 | 96.95911 (HSO4-)                                                                                                                                                                                                                |           |                                                                                                                                                                                                                                         |
|         |  | 6.70 | 227.12935 | 97.06491 (C6H9O-), 165.12825 (C11H17O-), 183.13882 (C11H19O2-), 209.11833 (C12H17O3-)                                                                                                                                           |           |                                                                                                                                                                                                                                         |
| GPE     |  | 6.72 | 382.20074 | 78.95795 (PO3-), 96.96865 (H2PO4-), 152.99550 (C3H6PO5-), 171.00623 (C3H8PO6-), 308.16330 (C13H27NPO5-)                                                                                                                         | 384.21524 | 212.20082 (C13H26NO+)                                                                                                                                                                                                                   |

|     |  |      |           |                                                                                                                                                                                                                                                                                                                                    |           |                                                                         |
|-----|--|------|-----------|------------------------------------------------------------------------------------------------------------------------------------------------------------------------------------------------------------------------------------------------------------------------------------------------------------------------------------|-----------|-------------------------------------------------------------------------|
| GPE |  | 6.75 | 436.10703 | 78.95782 (PO3-), 96.96848 (H2PO4-), 152.99545 (C3H6PO5-), 171.00623 (C3H8PO6-), 290.11664 (C12H21NPO5-), 364.15302 (C15H27NPO7-), 400.12967 (C15H28CINPO7-)                                                                                                                                                                        | 438.12153 | 194.15393 (C12H20NO+), 266.10703 (C12H22ONCl2+)                         |
| GPE |  | 6.76 | 462.22723 | 78.95785 (PO3-), 96.96857 (H2PO4-), 152.99561 (C3H6PO5-), 171.00629 (C3H8PO6-)                                                                                                                                                                                                                                                     | 464.24173 | 274.21619 (C18H28NO+), 292.22681 (C18H30NO2+)                           |
| GPE |  | 6.94 | 472.18796 | 78.95782 (PO3-), 96.96861 (H2PO4-), 152.99547 (C3H6PO5-), 171.00626 (C3H8PO6-), 436.21048 (C19H35NPO8-)                                                                                                                                                                                                                            | 474.20246 | 248.20082 (C16H26NO+), 266.21118 (C16H28NO2+), 302.18796 (C16H29CINO2+) |
| GPE |  | 7.14 | 582.26947 | 59.01256 (C2H3O2-), 71.01260 (C3H3O2-), 78.95783 (PO3-), 89.02332 (C3H5O3-), 96.96854 (H2PO4-), 101.02341 (C4H5O3-), 113.02357 (C5H5O3-), 119.03416 (C4H7O4-), 152.99548 (C3H6PO5-), 171.00616 (C3H8PO6-), 333.05972 (C9H18PO11-)                                                                                                  | 584.28397 | 250.21646 (C16H28NO+)                                                   |
| GPE |  | 7.28 | 606.26965 | 59.01256 (C2H3O2-), 71.01258 (C3H3O2-), 78.95782 (PO3-), 89.02328 (C3H5O3-), 96.96855 (H2PO4-), 101.02338 (C4H5O3-), 113.02349 (C5H5O3-), 119.03416 (C4H7O4-), 152.99548 (C3H6PO5-), 171.00626 (C3H8PO6-), 333.05948 (C9H18PO11-)                                                                                                  | 608.28415 | 274.21637 (C18H28NO+)                                                   |
|     |  | 7.42 | 532.23260 | 78.95787 (PO3-), 96.96854 (H2PO4-), 370.17862 (C18H29NPO5-)                                                                                                                                                                                                                                                                        |           |                                                                         |
| GPE |  | 7.44 | 474.20380 | 78.95783 (PO3-), 96.96849 (H2PO4-), 152.99550 (C3H6PO5-), 171.00621 (C3H8PO6-), 438.22610 (C19H37NPO8-)                                                                                                                                                                                                                            |           |                                                                         |
| GPE |  | 7.52 | 608.28552 | 59.01255 (C2H3O2-), 71.01257 (C3H3O2-), 78.95782 (PO3-), 85.02837 (C4H5O2-), 89.02325 (C3H5O3-), 96.96856 (H2PO4-), 101.02342 (C4H5O3-), 113.02359 (C5H5O3-), 119.03427 (C4H7O4-), 152.99542 (C3H6PO5-), 171.00644 (C3H8PO6-), 333.05966 (C9H18PO11-)                                                                              |           |                                                                         |
| GPE |  | 7.53 | 596.28528 | 59.01256 (C2H3O2-), 71.01261 (C3H3O2-), 78.95783 (PO3-), 89.02332 (C3H5O3-), 96.96854 (H2PO4-), 101.02345 (C4H5O3-), 152.99550 (C3H6PO5-), 333.06049 (C9H18PO11-)                                                                                                                                                                  | 598.29978 | 264.23196 (C17H30NO+)                                                   |
| EA  |  | 7.67 | 280.16898 |                                                                                                                                                                                                                                                                                                                                    | 246.20680 |                                                                         |
| GPE |  | 7.86 | 632.28528 | 59.01255 (C2H3O2-), 71.01259 (C3H3O2-), 78.95781 (PO3-), 89.02328 (C3H5O3-), 96.96852 (H2PO4-), 101.02338 (C4H5O3-), 113.02361 (C5H5O3-), 119.03419 (C4H7O4-), 140.01123 (C2H7NPO4-), 152.99545 (C3H6PO5-), 171.00592 (C3H8PO6-), 196.03804 (C5H11NPO5-), 214.04857 (C5H13NPO6-), 333.05920 (C9H18PO11-), 376.10150 (C11H23NPO11-) | 634.29950 | 300.23224 (C20H30NO+)                                                   |
| GPE |  | 8.04 | 610.30066 | 59.01258 (C2H3O2-), 71.01263 (C3H3O2-), 78.95790 (PO3-), 89.02340 (C3H5O3-), 96.96866 (H2PO4-), 101.02349 (C4H5O3-), 113.02362 (C5H5O3-), 119.03426 (C4H7O4-), 152.99551 (C3H6PO5-), 171.00633 (C3H8PO6-), 333.05917 (C9H18PO11-)                                                                                                  | 612.31439 | 278.24771 (C18H32NO+)                                                   |
| GPE |  | 8.10 | 598.30084 | 59.01257 (C2H3O2-), 71.01258 (C3H3O2-), 78.95782 (PO3-), 89.02328 (C3H5O3-), 96.96854 (H2PO4-), 101.02338 (C4H5O3-), 113.02354 (C5H5O3-), 119.03410 (C4H7O4-), 152.99547 (C3H6PO5-), 171.00618 (C3H8PO6-), 333.05948 (C9H18PO11-)                                                                                                  | 600.31488 | 98.06043 (C5H8NO+), 266.24771 (C17H32NO+)                               |

**Table S3. Differential metabolites from *C. elegans* growth medium, ES- mode, that are decreased or absent in *daf-22* medium compared to N2. Peaks that are present but not differential in L1 medium are shown in blue. Peaks that are also differential in L1 medium are shown in red. Peaks that are also in L1 medium table (ES-) are shown in bold red. Manually added entries are shaded pink. Entries that have a corresponding peak in the ES+ table are shaded grey.**

| class | smid-db  | rt (min) | m/z (ES-)        | MS/MS (ES-)                                                                                                                                                                                                                                                                                                                                                                                        | m/z (ES+)            | MS/MS (ES+)                                                                                                                                                                                                                                                                                                                                                                         |
|-------|----------|----------|------------------|----------------------------------------------------------------------------------------------------------------------------------------------------------------------------------------------------------------------------------------------------------------------------------------------------------------------------------------------------------------------------------------------------|----------------------|-------------------------------------------------------------------------------------------------------------------------------------------------------------------------------------------------------------------------------------------------------------------------------------------------------------------------------------------------------------------------------------|
| ascr  | bhas#9   | 1.79     | <b>263.11383</b> | 59.01257 (C2H3O2-), 73.02821 (C3H5O2-), 115.03921 (C5H7O3-), 245.10316 (C11H17O6-)                                                                                                                                                                                                                                                                                                                 | 287.11014            | 157.04724 (C5H10NaO4+)                                                                                                                                                                                                                                                                                                                                                              |
| ascr  | uglas#11 | 2.92     | 667.18811        | 78.95777 (PO3-), 96.96848 (H2PO4-), 124.01446 (C4H2N3O2-), 167.02077 (C5H3N4O3-), 178.02559 (C7H4N3O3-), 223.00130 (C6H8PO7-), 241.01166 (C6H10PO8-), 275.14966 (C13H23O6-, ascr#1), 293.05246 (C11H9N4O6-), 311.06277 (C11H11N4O7-), 391.02945 (C11H12N4PO10-), 409.03973 (C11H14N4PO11), 499.15857 (C19H32PO13-), 537.12195 (C18H26N4PO13-), 569.21106 (C24H33N4O12-), 624.17889 (C23H35N3PO15-) | 669.20190, 539.13904 | 98.98456 (H4PO4+), 97.02879 (C5H5O2+), 127.03919 (C6H7O3+), 129.09111 (C7H13O2+), 169.03543 (C5H5N4O3+), 243.02618 (C6H12PO8+)                                                                                                                                                                                                                                                      |
| ascr  | uglas#1  | 3.70     | 587.22061        |                                                                                                                                                                                                                                                                                                                                                                                                    |                      |                                                                                                                                                                                                                                                                                                                                                                                     |
|       |          | 3.74     | 427.13766        |                                                                                                                                                                                                                                                                                                                                                                                                    |                      |                                                                                                                                                                                                                                                                                                                                                                                     |
| ascr  |          | 3.83     | 517.16962        | 78.95777 (PO3-), 96.96849 (H2PO4-), 241.01221 (C6H10PO8-)                                                                                                                                                                                                                                                                                                                                          |                      |                                                                                                                                                                                                                                                                                                                                                                                     |
|       |          | 3.84     | 723.21429        | 78.95778 (PO3-), 96.96848 (H2PO4-), 114.05506, 128.03453, 167.02094 (C5H3N4O3-), 178.02570 (C7H4N3O3-)                                                                                                                                                                                                                                                                                             |                      |                                                                                                                                                                                                                                                                                                                                                                                     |
| ascr  |          | 3.87     | <b>355.11676</b> | 78.95777 (PO3-)                                                                                                                                                                                                                                                                                                                                                                                    |                      |                                                                                                                                                                                                                                                                                                                                                                                     |
|       |          | 3.89     | 241.02739        |                                                                                                                                                                                                                                                                                                                                                                                                    | 243.04189            |                                                                                                                                                                                                                                                                                                                                                                                     |
|       |          | 4.31     | 923.31970        | 78.95778 (PO3-), 167.02072 (C5H3N4O3-),                                                                                                                                                                                                                                                                                                                                                            |                      |                                                                                                                                                                                                                                                                                                                                                                                     |
| ascr  |          | 4.46     | 749.22992        | 78.95776 (PO3-), 96.96847 (H2PO4-), 102.05496 (C4H8NO2-), 124.01448 (C4H2N3O2-), 128.03450 (C5H6NO3-), 167.02075 (C5H3N4O3-), 178.02559 (C7H4N3O3-), 186.12457 (C8H16N3O2-), 208.10902 (C10H14N3O2-), 227.10361 (C10H15N2O4-), 393.10526 (C16H17N4O8-), 470.29791, 491.08157, 581.20013                                                                                                            | 621.18109            | 97.02879 (C5H5O2+), 98.98442 (H4PO4+), 127.03907 (C6H7O3+), 129.09117 (C7H13O2+), 167.08168 (C8H11N2O2+), 169.03531 (C5H5N4O3+), 209.0808 (C11H13O4+), 219.14922 (C13H19N2O+), 227.09126 (C11H15O5+), 229.15456 (C11H21N2O3+), 300.15515 (C13H22N3O5+), 307.05759 (C11H16PO8+), 337.16360 (C12H26N4PO5+), 341.18253 (C15H25N4O5+), 342.23871 (C17H32N3O4+), 362.17044 (C18H24N3O5+) |
|       |          | 4.55     | 751.24493        | 78.95777 (PO3-), 96.96848 (H2PO4-), 124.01422 (C4H2N3O2-), 127.05039 (C5H7N2O2-), 128.03445 (C5H6NO3-), 167.02060 (C5H3N4O3-), 178.02544 (C7H4N3O3-), 493.09698, 583.21722 (?)                                                                                                                                                                                                                     |                      |                                                                                                                                                                                                                                                                                                                                                                                     |
|       |          | 4.64     | 785.22943        | 78.95777 (PO3-), 124.01422 (C4H2N3O2-), 167.02060 (C5H3N4O3-)                                                                                                                                                                                                                                                                                                                                      |                      |                                                                                                                                                                                                                                                                                                                                                                                     |
| ascr  |          | 4.64     | <b>381.13177</b> | 78.95776 (PO3-)                                                                                                                                                                                                                                                                                                                                                                                    | 211.03685            |                                                                                                                                                                                                                                                                                                                                                                                     |
| ascr  | ascr#82  | 4.76     | 650.25781        | 73.02825 (C3H5O2-), 92.04943 (C6H6N-), 102.05498 (C4H8NO2-), 128.03450 (C5H6NO3-), 146.04530 (C5H8NO4-), 203.08250 (C11H11N2O2-), 221.09302 (C11H13N2O3-), 392.17139                                                                                                                                                                                                                               | 652.27191            | 120.04460 (C7H6NO+), 246.11238 (C14H16NO3+)                                                                                                                                                                                                                                                                                                                                         |

|      |         |      |                  |                                                                                                                                                                                                              |           |                                                                                                                                                                                                                                                                                                                                        |
|------|---------|------|------------------|--------------------------------------------------------------------------------------------------------------------------------------------------------------------------------------------------------------|-----------|----------------------------------------------------------------------------------------------------------------------------------------------------------------------------------------------------------------------------------------------------------------------------------------------------------------------------------------|
|      |         |      |                  | (C20H26NO7-, ascr#8), 503.20291<br>(C25H31N2O9-), 521.21362<br>(C25H33N2O10-), 632.24597<br>(C30H38N3O12-)                                                                                                   |           |                                                                                                                                                                                                                                                                                                                                        |
|      |         | 4.80 | 599.21228        | 78.95778 (PO3-), 96.96848<br>(H2PO4-)                                                                                                                                                                        |           |                                                                                                                                                                                                                                                                                                                                        |
| ascr |         | 4.81 | <b>383.14828</b> | 78.95792 (PO3-)                                                                                                                                                                                              |           |                                                                                                                                                                                                                                                                                                                                        |
|      |         | 4.82 | 604.18127        | 78.95778 (PO3-), 96.96849<br>(H2PO4-), 114.05508 (C5H8NO2-),<br>127.05049 (C5H7N2O2- ?),<br>129.10262 (C6H13N2O- ?),<br>131.04538 (C4H7N2O3- ?),<br>240.13531 (C11H18N3O3- ?),<br>258.14575 (C11H20N3O4- ?)  | 606.19577 |                                                                                                                                                                                                                                                                                                                                        |
| ascr |         | 4.85 | 574.17072        | 78.95778 (PO3-), 96.96848<br>(H2PO4-), 358.07004<br>(C14H17NPO8-)                                                                                                                                            | 576.18439 | 87.04459 (C4H7O2+), 95.04962<br>(C6H7O+), 98.98460 (H4PO4+),<br>118.06536 (C8H8N+), 127.03914<br>(C6H7O3+), 158.06021 (C10H8NO+),<br>172.07562 (C11H10NO+), 226.08620<br>(C14H12NO2+), 243.02664 (C6H12PO8+),<br>244.09686 (C14H14NO3+), 458.12155<br>(C19H25NPO10+)                                                                   |
|      |         | 4.88 | 951.35046        | 78.95779 (PO3-), 96.96850<br>(H2PO4-), 124.01435 (C4H2N3O2-<br>), 167.02072 (C5H3N4O3-),<br>178.02536 (C7H4N3O3-),<br>675.19305, 693.20465, 783.32550                                                        | 953.36496 | 127.03922 (C6H7O3+), 137.09625<br>(C9H13O+), 281.13837 (C15H21O5+),<br>675.22778                                                                                                                                                                                                                                                       |
| ascr | uglas#3 | 4.92 | 613.23743        | 84.00776 (C3H2NO2-), 99.01884<br>(C3H3N2O2-), 124.01435<br>(C4H2N3O2-), 141.02994<br>(C5H5N2O3-), 167.02077<br>(C5H3N4O3-), 180.04128<br>(C7H6N3O3-), 268.05731<br>(C10H10N3O6-), 311.06326<br>(C11H11N4O7-) | 615.25193 | 127.03912 (C6H7O3+), 137.09621<br>(C9H13O+), 155.10675 (C9H15O2+),<br>169.03560 (C5H5N4O3+), 173.11771<br>(C9H17O3+), 187.10759 (C8H15N2O3+),<br>215.10280 (C9H15N2O4+), 281.13821<br>(C15H21O5+), 299.14908 (C15H23O6+),<br>317.16000 (C15H25O7+), 328.18646<br>(C15H26N3O5+), 441.27097<br>(C21H37N4O6+), 467.17691<br>(C20H27N4O9+) |
| ascr |         | 4.95 | 638.23297        | 71.01260 (C3H3O2-), 107.03544<br>(C4H3N4-), 115.00285 (C4H3O4-),<br>134.04654 (C5H4N5-), 162.07819<br>(C7H8N5-), 188.05774 (C8H6N5O-<br>), 206.06824 (C8H8N5O2-)                                             | 640.24683 | 129.10226 (C6H13N2O+), 136.06172<br>(C5H6N5+), 162.07738 (C7H8N5+),<br>188.05649 (C8H6N5O+), 192.05151<br>(C7H6N5O2+), 206.06705 (C8H8N5O2+),<br>234.06195 (C9H8N5O3+), 252.07259<br>(C9H10N5O4+), 259.11755 (C12H19O6+),<br>510.18301 (C21H28N5O10+)                                                                                  |
| ascr |         | 5.03 | 792.27258        | 78.95776 (PO3-), 96.96846<br>(H2PO4-)                                                                                                                                                                        | 794.28632 | 136.06175 (C5H6N5+), 148.06194<br>(C6H6N5+), 262.09311 (C11H12N5O3+),<br>287.14896 (C14H23O6+), 378.08072<br>(C11H17N5PO8+)                                                                                                                                                                                                            |
| ascr |         | 5.05 | 640.24872        |                                                                                                                                                                                                              | 642.26322 | 136.06180 (C5H6N5+), 162.07738<br>(C7H8N5+), 252.07251 (C9H10N5O4+),<br>359.17099 (C18H23N4O4+), 428.25092<br>(C19H34N5O6+), 512.19836<br>(C21H30N5O10+)                                                                                                                                                                               |
| ascr |         | 5.06 | <b>463.21936</b> | 59.01253 (C2H3O2-), 71.01257<br>(C3H3O2-), 73.02823 (C3H5O2-),<br>85.02837 (C4H5O2-), 101.02341<br>(C4H5O3-), 113.02359 (C5H5O3-)                                                                            | 482.26001 |                                                                                                                                                                                                                                                                                                                                        |
| ascr |         | 5.06 | 560.15472        | 78.95789 (PO3-), 96.96860<br>(H2PO4-), 412.08038<br>(C17H19NPO9-)                                                                                                                                            | 562.16922 | 127.03913 (C6H7O3+), 130.06519<br>(C9H8N+), 444.10501 (C18H23NPO10+)                                                                                                                                                                                                                                                                   |
| EA   |         | 5.15 | <b>256.15598</b> |                                                                                                                                                                                                              | 258.17048 | 152.10698 (C9H14NO+), 194.11757<br>(C11H16NO2+), 212.12811<br>(C11H18NO3+), 222.11237<br>(C12H16NO3+), 240.15915<br>(C13H22NO3+)                                                                                                                                                                                                       |
|      |         | 5.16 | 632.21271        | 78.95776 (PO3-), 96.96848<br>(H2PO4-)                                                                                                                                                                        | 634.22721 |                                                                                                                                                                                                                                                                                                                                        |
|      |         | 5.21 | 497.09778        | 78.95779 (PO3-), 96.96851<br>(H2PO4-)                                                                                                                                                                        | 499.11228 |                                                                                                                                                                                                                                                                                                                                        |
|      |         | 5.22 | 564.18628        |                                                                                                                                                                                                              |           |                                                                                                                                                                                                                                                                                                                                        |
| ascr |         | 5.28 | <b>435.22433</b> | 59.01256 (C2H3O2-), 73.02819                                                                                                                                                                                 |           |                                                                                                                                                                                                                                                                                                                                        |

|      |                     |      |           |                                                                                                                                                                                                                                |                      |                                                                                                                                                                                                                                                                                                                                                                                                                                                                                           |
|------|---------------------|------|-----------|--------------------------------------------------------------------------------------------------------------------------------------------------------------------------------------------------------------------------------|----------------------|-------------------------------------------------------------------------------------------------------------------------------------------------------------------------------------------------------------------------------------------------------------------------------------------------------------------------------------------------------------------------------------------------------------------------------------------------------------------------------------------|
|      |                     |      |           | (C3H5O2-), 85.02831 (C4H5O2-), 111.04420 (C6H7O2-), 113.02335 (C5H5O3-), 155.10727 (C9H15O2-), 173.11801 (C9H17O3-), 287.15033 (C14H23O6-), 305.16031 (C14H25O7-)                                                              |                      |                                                                                                                                                                                                                                                                                                                                                                                                                                                                                           |
|      |                     | 5.31 | 634.19214 | 78.95776 (PO3-), 96.96851 (H2PO4-), 223.00159 (C6H8PO7-), 497.14322 (C19H30PO13-)                                                                                                                                              | 636.20664            | 109.06512 (C7H9O+), 120.04447 (C7H6NO+), 127.07549 (C7H11O2+)                                                                                                                                                                                                                                                                                                                                                                                                                             |
|      |                     | 5.34 | 630.19720 | 78.95778 (PO3-), 96.96852 (H2PO4-)                                                                                                                                                                                             | 632.21170            |                                                                                                                                                                                                                                                                                                                                                                                                                                                                                           |
|      |                     | 5.37 | 350.17453 | 78.95783 (PO3-), 96.96857 (H2PO4-), 140.01125 (C2H7NPO4-)                                                                                                                                                                      | 352.18903            | 98.06043 (C5H8NO+), 236.20067 (C15H26NO+), 254.21118 (C15H28NO2+)                                                                                                                                                                                                                                                                                                                                                                                                                         |
| ascr | iglas#91            | 5.37 | 588.18646 | 78.95776 (PO3-), 96.96845 (H2PO4-)                                                                                                                                                                                             | 590.20096            | 98.98453 (H4PO4+), 101.06011 (C5H9O2+), 118.06529 (C8H8N+), 127.03906 (C6H7O3+), 130.06509 (C9H8N+), 158.06007 (C10H8NO+), 226.08649 (C14H12NO2+), 244.09703 (C14H14NO3+), 256.22672 (C15H30NO2+), 362.15912 (C19H24NO6+), 472.13617 (C10H27NPO10+)                                                                                                                                                                                                                                       |
|      |                     | 5.42 | 779.27753 | 78.95778 (PO3-), 96.96849 (H2PO4-), 167.02077 (C5H3N4O3-)                                                                                                                                                                      |                      |                                                                                                                                                                                                                                                                                                                                                                                                                                                                                           |
| ascr | iglas#11 (2nd peak) | 5.44 | 616.21698 | 78.95778 (PO3-), 96.96849 (H2PO4-), 2nd peak also has 340.05902 (C14H15NPO6-), 358.06961 (C14H17NPO8-)                                                                                                                         | 488.16867, 618.23224 | 98.98457 (H4PO4+), 109.02872 (C6H5O2+), 118.06540 (C8H8N+), 127.03906 (C6H7O3+), 129.09109 (C7H13O2+), 154.06520 (C11H8N+), 158.05997 (C10H8NO+), 180.08072 (C13H10N+), 184.07574 (C12H10NO+), 198.09140 (C13H12NO+), 202.08638 (C12H12NO2+), 210.09100 (C14H12NO+), 226.08617 (C14H12NO2+), 237.11197 (C13H17O4+), 244.09689 (C14H14NO3+), 255.12274 (C13H19O5+), 262.10727 (C14H16NO4+), 335.08871 (C13H20PO8+), 354.16925 (C21H24NO4+), 372.18027 (C21H26NO5+), 390.19098 (C21H28NO6+) |
|      |                     | 5.48 | 585.15051 | 92.04934 (C6H6N-), 116.04958 (C8H6N-), 136.03961 (C7H6NO2-), 160.03989 (C9H6NO2-), 172.04019 (C10H6NO2-), 178.05067 (C9H8NO3-), 190.05072 (C10H8NO3-), 250.07254 (C12H12NO5-), 268.08231 (C12H14NO6-), 412.12393 (C18H22NO10-) | 551.18833            | 73.02906 (C3H5O2+), 85.02896 (C4H5O2+), 92.04992 (C6H6N+), 97.02882 (C5H5O2+), 120.04457 (C7H6NO+), 132.04445 (C8H6NO+), 134.06006 (C8H8NO+), 162.05481 (C9H8NO2+), 170.06010 (C11H8NO+), 180.06534 (C9H10NO3+), 198.05493 (C12H8NO2+), 216.06552 (C12H10NO3+), 234.07622 (C12H12NO4+), 252.08681 (C12H14NO5+), 270.09680 (C12H16NO6+), 282.09695 (C13H16NO6+), 378.11761 (C18H20NO8+), 396.12863 (C18H22NO9+)                                                                            |
| ascr |                     | 5.50 | 455.20572 | 78.95777 (PO3-), 96.96849 (H2PO4-), 209.02197 (C6H10PO6-)                                                                                                                                                                      | 457.22022            |                                                                                                                                                                                                                                                                                                                                                                                                                                                                                           |
|      |                     | 5.52 | 285.17117 | 87.04401 (C4H7O2-), 115.07559 (C6H11O2-), 125.09640 (C8H13O-), 143.06897 (C7H11O3-), 155.10735 (C9H15O2-), 169.12308 (C19H17O2-), 241.18080 (C14H25O3-)                                                                        | 309.16757            | 291.15640 (C15H24NaO4+)                                                                                                                                                                                                                                                                                                                                                                                                                                                                   |
|      |                     | 5.52 | 530.18048 |                                                                                                                                                                                                                                |                      |                                                                                                                                                                                                                                                                                                                                                                                                                                                                                           |
|      |                     | 5.58 | 602.20239 |                                                                                                                                                                                                                                | 604.21689            |                                                                                                                                                                                                                                                                                                                                                                                                                                                                                           |
| ascr | nuclas#35, 36       | 5.65 | 666.26398 | 71.01255 (C3H3O2-), 107.03518 (C4H3N4-), 115.00274 (C4H3O4-), 134.04639 (C5H4N5-), 162.07800 (C7H8N5-), 188.05809 (C8H6N5O-), 206.06813 (C8H8N5O2-), 250.05795 (C9H8N5O4-), 338.11041 (C13H16N5O6-),                           | 668.27832            | 113.05988 (C6H9O2+), 136.06180 (C5H6N5+), 148.06177 (C6H6N5+), 155.10663 (C9H15O2+), 162.07733 (C7H8N5+), 173.11732 (C9H17O3+), 188.05664 (C8H6N5O+), 192.05151 (C7H6N5O2+), 206.06723 (C8H8N5O2+), 234.06197 (C9H8N5O3+), 252.07254                                                                                                                                                                                                                                                      |



|      |          |      |           |                                                                                                         |           |                                                                                                                                                                                                                                                                                                                                                                                                                                                                                                                   |
|------|----------|------|-----------|---------------------------------------------------------------------------------------------------------|-----------|-------------------------------------------------------------------------------------------------------------------------------------------------------------------------------------------------------------------------------------------------------------------------------------------------------------------------------------------------------------------------------------------------------------------------------------------------------------------------------------------------------------------|
|      |          |      |           | 382.10068 (C14H16N5O8-)                                                                                 |           | (C9H10N5O4+), 287.14871 (C14H23O6+), 382.13580 (C15H20N5O7+), 417.21103 (C20H33O9), 538.21429 (C23H32N5O10+)                                                                                                                                                                                                                                                                                                                                                                                                      |
| ascr |          | 5.67 | 411.17960 | 78.95777 (PO3-), 96.96845 (H2PO4-)                                                                      | 413.19410 | 83.04971 (C5H7O+), 95.04955 (C6H7O+), 113.05999 (C6H9O2+), 149.13264 (C11H17+), 167.14304 (C11H19O2+), 185.15347 (C11H21O2+), 211.03659 (C6H12PO6+)                                                                                                                                                                                                                                                                                                                                                               |
| ascr | anglas#7 | 5.70 | 590.20203 | 92.04940 (C6H6N-), 136.03970 (C7H6NO2-), 453.15356 (C19H30ClO10-)                                       | 556.23993 | 95.04960 (C6H7O+), 109.06513 (C7H9O+), 113.05999 (C6H9O2+), 120.04459 (C7H6NO+), 127.07548 (C7H11O2+), 138.05496 (C7H8NO2+), 146.02361 (C8H4NO2+), 162.05519 (C9H8NO2+), 172.07555 (C11H10NO+), 180.06519 (C9H10NO3+), 186.05501 (C11H8NO2+), 210.05490 (C13H8NO2+), 228.06540 (C13H10NO3+), 246.07628 (C13H12NO4+), 250.10721 (C13H16NO4+), 268.11755 (C13H18NO5+), 271.11731 (C13H19O6+), 289.12814 (C13H21O7+), 372.14462 (C20H22NO6+), 390.15500 (C20H24NO7+), 408.16544 (C20H26NO8+), 426.17566 (C20H28NO9+) |
| ascr | iglas#71 | 5.70 | 614.20160 | 78.95777 (PO3-), 96.96847 (H2PO4-), 358.06989 (C14H17NPO8-)                                             | 616.21661 | 109.06519 (C7H9O+), 118.06535 (C8H8N+), 127.03898 (C6H7O3+), 127.07549 (C7H11O2+), 130.06525 (C9H8N+), 144.08086 (C10H10N+), 172.07538 (C11H10NO+), 226.08644 (C14H12NO2+), 235.09691 (C13H15O4+), 243.02646 (C6H12PO8+), 244.09651 (C14H14NO3+), 262.10687 (C14H16NO4+), 370.16519 (C21H24NO5+), 388.17554 (C21H26NO6+)                                                                                                                                                                                          |
|      |          | 5.76 | 334.17972 |                                                                                                         | 300.21729 |                                                                                                                                                                                                                                                                                                                                                                                                                                                                                                                   |
| ascr |          | 5.78 | 544.19635 | 73.02822 (C3H5O2-), 116.04964 (C8H6N-), 247.11865 (C11H19O6-, ascr#9), 278.10324 (C14H16NO5-)           |           |                                                                                                                                                                                                                                                                                                                                                                                                                                                                                                                   |
| ascr | anglas#1 | 5.79 | 592.21759 | 92.04939 (C6H6N-), 136.03969 (C7H6NO2-), 455.16901 (C19H32ClO10-)                                       | 558.25586 | 95.04960 (C6H7O+), 111.08076 (C7H11O+), 113.06001 (C6H9O2+), 120.04460 (C7H6NO+), 129.09111 (C7H13O2+), 138.05499 (C7H8NO2+), 146.02357 (C8H4NO2+), 162.05463 (C9H8NO2+), 172.07555 (C11H10NO+), 180.06555 (C9H10NO3+), 228.06544 (C13H10NO3+), 237.11195 (C13H17O4+), 250.10730 (C13H16NO4+), 255.12253 (C13H19O5+), 268.11777 (C13H18NO5+), 273.13324 (C13H21O6+), 374.15930 (C20H24NO6+), 392.17081 (C20H26NO7+), 410.181184 (C20H28NO8+), 428.19128 (C20H30NO9+)                                              |
| GPE  |          | 5.80 | 412.21088 | 78.95777 (PO3-), 96.96841 (H2PO4-), 152.99530 (C3H6PO5-), 171.00607 (C3H8PO6-)                          | 414.22538 | 98.06047 (C5H8NO+), 224.20096 (C14H26NO+), 242.21140 (C14H28NO2+)                                                                                                                                                                                                                                                                                                                                                                                                                                                 |
| ascr |          | 5.88 | 409.16388 | 78.95780 (PO3-), 96.96854 (H2PO4-)                                                                      | 411.17838 | 83.04975 (C5H7O+), 95.04975 (C6H7O+), 113.06001 (C6H9O2+), 137.09607 (C9H13O+), 183.13815 (C11H19O2+), 201.14886 (C11H21O3+), 211.03673 (C6H12PO6+)                                                                                                                                                                                                                                                                                                                                                               |
| EA   |          | 5.98 | 310.17966 |                                                                                                         | 276.21748 | 62.06081 (C2H8NO+), 240.19566 (C14H26NO2+), 258.20624 (C14H28NO3+)                                                                                                                                                                                                                                                                                                                                                                                                                                                |
| GPE  |          | 6.03 | 438.22690 | 78.95776 (PO3-), 96.96840 (H2PO4-), 152.99524 (C3H6PO5-), 171.00600 (C3H8PO6-), 364.18936 (C16H31NPO6-) | 440.24140 | 250.21649 (C16H28NO+), 268.22696 (C16H30NO2+)                                                                                                                                                                                                                                                                                                                                                                                                                                                                     |
| GPE  |          | 6.10 | 368.18478 | 78.95783 (PO3-), 96.96849                                                                               | 370.19928 | 198.18520 (C12H24NO+)                                                                                                                                                                                                                                                                                                                                                                                                                                                                                             |

|      |          |      |           |                                                                                                                                                                                                                                   |           |                                                                                                                                                                                                                                                                                                                      |
|------|----------|------|-----------|-----------------------------------------------------------------------------------------------------------------------------------------------------------------------------------------------------------------------------------|-----------|----------------------------------------------------------------------------------------------------------------------------------------------------------------------------------------------------------------------------------------------------------------------------------------------------------------------|
|      |          |      |           | (H2PO4-), 152.99535 (C3H6PO5-), 171.00609 (C3H8PO6-), 294.14722 (C12H25NPO5-)                                                                                                                                                     |           |                                                                                                                                                                                                                                                                                                                      |
| ascr | iglas#7  | 6.17 | 570.21198 | 73.02822 (C3H5O2-), 83.04903 (C5H7O-), 101.02339 (C4H5O3-), 111.04424 (C6H7O2-), 116.04966 (C8H6N-), 125.06000 (C7H9O2-), 273.13434 (C13H21O6-, ascr#7), 278.10318 (C14H16NO5-)                                                   | 536.24980 | 127.07551 (C7H11O2+), 130.06526 (C9H8N+), 230.11761 (C14H16NO2+), 254.11775 (C16H16NO2+), 289.12820 (C13H21O7+)                                                                                                                                                                                                      |
|      |          | 6.17 | 378.20551 | 78.95777 (PO3-), 96.96846 (H2PO4-), 140.01117 (C2H7NPO4-)                                                                                                                                                                         | 380.22001 | 98.06042 (C5H8NO+), 264.23199 (C17H30NO+), 282.24255 (C17H32NO2+)                                                                                                                                                                                                                                                    |
| ascr | iglas#31 | 6.26 | 642.23291 | 78.95786 (PO3-), 96.96859 (H2PO4-), 358.06979 (C14H17NPO8-)                                                                                                                                                                       | 644.24701 | 118.06532 (C8H8N+), 127.03913 (C6H7O3+), 130.06526 (C9H8N+), 137.09615 (C9H13O+), 226.08643 (C14H12NO2+), 281.13889 (C15H21O5+), 398.19626 (C23H28NO5+), 416.20734 (C23H30NO6+)                                                                                                                                      |
| ascr | iglas#1  | 6.30 | 572.22729 | 73.02820 (C3H5O2-), 116.04965 (C8H6N-), 127.07566 (C7H11O2-), 275.14975 (C13H23O6-, ascr#1), 278.10309 (C14H16NO5-)                                                                                                               | 538.26520 | 95.04958 (C6H7O+), 111.08086 (C7H11O+), 118.06535 (C8H8N+), 130.06519 (C9H8N+), 144.08075 (C10H0N+), 158.06001 (C10H8NO+), 172.07564 (C11H10NO+), 184.07570 (C12H10NO+), 184.11212 (C13H14N+), 212.10701 (C14H14NO+), 230.11742 (C14H16NO2+), 254.11760 (C16H16NO2+), 272.12784 (C16H18NO3+), 484.23303 (C27H34NO7+) |
| GPE  |          | 6.34 | 580.25354 | 59.01253 (C2H3O2-), 71.01254 (C3H3O2-), 78.95779 (PO3-), 89.02324 (C3H5O3-), 96.96848 (H2PO4-), 101.02332 (C4H5O3-), 113.02347 (C5H5O3-), 119.03403 (C4H7O4-), 152.99541 (C3H6PO5-), 171.00626 (C3H8PO6-), 333.05923 (C9H18PO11-) | 582.26804 | 248.20082 (C16H26NO+)                                                                                                                                                                                                                                                                                                |
|      |          | 6.38 | 453.10767 | 92.04941 (C6H6N-), 116.04967 (C8H6N-), 136.03972 (C7H6NO2-), 178.05064 (C9H8NO3-)                                                                                                                                                 | 419.14514 | 95.04994 (C6H6N+), 120.04459 (C7H6NO+), 97.02884 (C5H5O2+), 138.05496 (C7H8NO2+), 228.06548 (C13H10NO3+), 264.08649 (C14H14NO5+), 282.09708 (C13H16NO6+)                                                                                                                                                             |
|      |          | 6.39 | 225.11357 | 59.01254 (C2H3O2-), 163.11240 (C11H15O-), 181.12320 (C11H17O2-)                                                                                                                                                                   |           |                                                                                                                                                                                                                                                                                                                      |
| GPE  |          | 6.66 | 570.26923 | 59.01252 (C2H3O2-), 71.01255 (C3H3O2-), 78.95779 (PO3-), 89.02321 (C3H5O3-), 96.96848 (H2PO4-), 101.02333 (C4H5O3-), 113.02354 (C5H5O3-), 119.03412 (C4H7O4-), 152.99535 (C3H6PO5-), 171.00612 (C3H8PO6-), 333.05914 (C9H18PO11-) | 572.28406 | 98.06041 (C5H8NO+), 112.07590 (C6H10NO+), 126.09136 (C7H12NO), 140.10696 (C8H14NO+), 238.21637 (C15H28NO+), 256.22693 (C15H30NO2+), 410.22925 (C18H37NPO7+)                                                                                                                                                          |
| GPE  |          | 6.68 | 582.26923 | 59.01254 (C2H3O2-), 71.01256 (C3H3O2-), 78.95779 (PO3-), 89.02323 (C3H5O3-), 96.96850 (H2PO4-), 101.02335 (C4H5O3-), 113.02353 (C5H5O3-), 119.03412 (C4H7O4-), 152.99547 (C3H6PO5-), 171.00610 (C3H8PO6-), 333.05923 (C9H18PO11-) | 584.28400 | 250.21646 (C16H28NO+)                                                                                                                                                                                                                                                                                                |
| GPE  |          | 6.73 | 594.26929 | 59.01254 (C2H3O2-), 71.01251 (C3H3O2-), 78.95778 (PO3-), 89.02315 (C3H5O3-), 96.96845 (H2PO4-), 101.02335 (C4H5O3-), 152.99541 (C3H6PO5-)                                                                                         | 596.28379 | 262.21640 (C17H28NO+)                                                                                                                                                                                                                                                                                                |
|      |          | 6.76 | 496.23230 | 78.95782 (PO3-), 96.96849 (H2PO4-), 138.97931 (C2H4PO5-), 140.01134 (C2H7NPO4-), 259.02188 (C6H12PO9-), 316.16827 (C15H27NPO4-), 334.17877 (C15H29NPO5-),                                                                         |           |                                                                                                                                                                                                                                                                                                                      |

|      |  |      |           |                                                                                                                                                                                                                                                                                   |           |                                                                                                                                                                                                                                                                                                  |
|------|--|------|-----------|-----------------------------------------------------------------------------------------------------------------------------------------------------------------------------------------------------------------------------------------------------------------------------------|-----------|--------------------------------------------------------------------------------------------------------------------------------------------------------------------------------------------------------------------------------------------------------------------------------------------------|
|      |  |      |           | 376.18976 (C17H31NPO6-)                                                                                                                                                                                                                                                           |           |                                                                                                                                                                                                                                                                                                  |
| EA   |  | 6.78 | 292.16898 | 86.02374 (C3H4NO2-), 142.08717 (C7H12NO2-), 256.19217 (C14H26NO3-)                                                                                                                                                                                                                | 258.20651 | 62.06083 (C2H8NO+), 70.02945 (C3H4NO+), 88.03984 (C3H6NO2+), 128.07065 (C6H10NO2+), 179.14307 (C12H19O+), 198.18536 (C12H24NO+), 222.18533 (C14H24NO+), 240.19576 (C14H26NO2+)                                                                                                                   |
| ascr |  | 6.83 | 598.24384 | 301.16507 (C15H25O6-, ascr#3)                                                                                                                                                                                                                                                     | 581.30774 | 118.06526 (C8H8N+), 130.06512 (C9H8N+), 137.09599 (C9H13O+), 144.08081 (C10H10N+), 155.10666 (C9H15O2+), 160.07570 (C10H10NO+), 170.09636 (C12H12N+), 172.07545 (C11H10NO+), 198.09128 (C13H12NO+), 212.10680 (C14H14NO+), 226.08607 (C14H12NO2+), 317.15897 (C15H25O7+), 398.19669 (C23H28NO5+) |
| GPE  |  | 6.83 | 606.26935 | 59.01252 (C2H3O2-), 71.01254 (C3H3O2-), 78.95778 (PO3-), 89.02322 (C3H5O3-), 96.96848 (H2PO4-), 101.02332 (C4H5O3-), 113.02352 (C5H5O3-), 119.03402 (C4H7O4-), 152.99533 (C3H6PO5-), 171.00616 (C3H8PO6-), 333.05927 (C9H18PO11-)                                                 | 608.28345 | 274.21634 (C18H28NO+)                                                                                                                                                                                                                                                                            |
| EA   |  | 6.86 | 294.18445 |                                                                                                                                                                                                                                                                                   | 260.22202 | 62.06082 (C2H8NO+)                                                                                                                                                                                                                                                                               |
| GPE  |  | 6.93 | 618.26941 | 59.01254 (C2H3O2-), 71.01257 (C3H3O2-), 78.95786 (PO3-), 89.02338 (C3H5O3-), 96.96867 (H2PO4-), 101.02345 (C4H5O3-), 113.02363 (C5H5O3-), 119.03423 (C4H7O4-), 140.01122 (C2H7NPO4-), 152.99542 (C3H6PO5-), 376.10193 (C11H23NPO11-)                                              | 620.28357 | 286.21637 (C19H28NO+)                                                                                                                                                                                                                                                                            |
| GPE  |  | 7.00 | 408.21609 | 78.95779 (PO3-), 96.96850 (H2PO4-), 152.99539 (C3H6PO5-), 171.00613 (C3H8PO6-), 334.17902 (C15H29NPO5-)                                                                                                                                                                           | 410.23059 | 98.06040 (C5H8NO+), 238.21635 (C15H28NO+)                                                                                                                                                                                                                                                        |
| GPE  |  | 7.01 | 420.21622 | 78.95781 (PO3-), 96.96849 (H2PO4-), 152.99533 (C3H6PO5-), 171.00604 (C3H8PO6-)                                                                                                                                                                                                    | 422.23072 | 250.21634 (C16H28NO+)                                                                                                                                                                                                                                                                            |
| GPE  |  | 7.04 | 596.28479 | 59.01261 (C2H3O2-), 71.01265 (C3H3O2-), 78.95787 (PO3-), 89.02328 (C3H5O3-), 96.96852 (H2PO4-), 101.02336 (C4H5O3-), 113.02349 (C5H5O3-), 119.03413 (C4H7O4-), 152.99536 (C3H6PO5-), 333.05899 (C9H18PO11-)                                                                       | 598.29926 | 98.06040 (C5H8NO+), 264.23203 (C17H30NO+)                                                                                                                                                                                                                                                        |
| GPE  |  | 7.21 | 608.28406 | 59.01253 (C2H3O2-), 71.01255 (C3H3O2-), 78.95778 (PO3-), 89.02322 (C3H5O3-), 96.96848 (H2PO4-), 101.02331 (C4H5O3-), 113.02353 (C5H5O3-), 119.03403 (C4H7O4-), 152.99538 (C3H6PO5-), 333.05933 (C9H18PO11-)                                                                       | 610.29856 | 276.23196 (C18H30NO+)                                                                                                                                                                                                                                                                            |
| EA   |  | 7.21 | 344.19998 |                                                                                                                                                                                                                                                                                   | 310.23758 | 62.06079 (C2H8NO+), 292.22681 (C18H30NO2+)                                                                                                                                                                                                                                                       |
| GPE  |  | 7.22 | 452.24234 | 78.95779 (PO3-), 96.96850 (H2PO4-), 140.01120 (C2H7NPO4-), 152.99541 (C3H6PO5-), 171.00610 (C3H8PO6-), 214.04858 (C5H13NPO6-)                                                                                                                                                     | 454.25684 | 86.06058 (C4H8NO+), 264.23193 (C17H30NO+), 282.24258 (C17H32NO2+)                                                                                                                                                                                                                                |
| GPE  |  | 7.24 | 632.28479 | 59.01255 (C2H3O2-), 71.01254 (C3H3O2-), 78.95777 (PO3-), 89.02318 (C3H5O3-), 96.96841 (H2PO4-), 101.02326 (C4H5O3-), 113.02338 (C5H5O3-), 119.03394 (C4H7O4-), 140.01123 (C2H7NPO4-), 152.99524 (C3H6PO5-), 171.00607 (C3H8PO6-), 196.03780 (C5H11NPO5-), 214.04849 (C5H13NPO6-), | 634.29929 | 98.06040 (C5H8NO+), 124.07578 (C7H10NO+), 300.23190 (C20H30NO+)                                                                                                                                                                                                                                  |

|     |  |      |           |                                                                                                                                                                                                                                                                                             |           |                                                                                             |
|-----|--|------|-----------|---------------------------------------------------------------------------------------------------------------------------------------------------------------------------------------------------------------------------------------------------------------------------------------------|-----------|---------------------------------------------------------------------------------------------|
|     |  |      |           | 333.05911 (C9H18PO11-),<br>376.10114 (C11H23NPO11-)                                                                                                                                                                                                                                         |           |                                                                                             |
| EA  |  | 7.29 | 334.21582 |                                                                                                                                                                                                                                                                                             | 300.25333 | 62.06079 (C2H8NO+), 282.24252<br>(C17H32NO2+)                                               |
| GPE |  | 7.35 | 434.23141 | 78.95783 (PO3-), 96.96848<br>(H2PO4-), 152.99535 (C3H6PO5-),<br>171.00610 (C3H8PO6-), 2nd peak<br>also has 140.01114 (C2H7NPO4-),<br>214.04854 (C5H13NPO6-)                                                                                                                                 | 436.24591 | 264.23203 (C17H30NO+)                                                                       |
| GPE |  | 7.37 | 410.23163 | 78.95777 (PO3-), 96.96846<br>(H2PO4-), 152.99533 (C3H6PO5-),<br>171.00606 (C3H8PO6-), 336.19443<br>(C15H31NPO5-)                                                                                                                                                                            | 412.24613 | 240.23204 (C15H30NO+)                                                                       |
| GPE |  | 7.38 | 610.30048 | 59.01254 (C2H3O2-), 71.01257<br>(C3H3O2-), 78.95781 (PO3-),<br>89.02328 (C3H5O3-), 96.96856<br>(H2PO4-), 101.02338 (C4H5O3-),<br>113.02358 (C5H5O3-), 119.03423<br>(C4H7O4-), 152.99541 (C3H6PO5-),<br>171.00616 (C3H8PO6-), 333.05923<br>(C9H18PO11-)                                      | 612.31458 | 278.24765 (C18H32ON+)                                                                       |
| GPE |  | 7.44 | 598.30060 | 59.01252 (C2H3O2-), 71.01255<br>(C3H3O2-), 78.95778 (PO3-),<br>89.02322 (C3H5O3-), 96.96844<br>(H2PO4-), 101.02332 (C4H5O3-),<br>113.02357 (C5H5O3-), 119.03406<br>(C4H7O4-), 152.99536 (C3H6PO5-),<br>171.00580 (C3H8PO6-), 333.05917<br>(C9H18PO11-)                                      | 600.31464 | 266.24762 (C17H32ON+)                                                                       |
| GPE |  | 7.57 | 446.23187 | 78.95776 (PO3-), 96.96846<br>(H2PO4-), 152.99536 (C3H6PO5-),<br>171.00606 (C3H8PO6-), 372.19406<br>(C18H31NPO5-)                                                                                                                                                                            | 448.24637 | 276.23199 (C18H30NO+)                                                                       |
| GPE |  | 7.59 | 822.36963 | 59.01249 (C2H3O2-), 71.01252<br>(C3H3O2-), 78.95777 (PO3-),<br>85.02821 (C4H5O2-), 89.02330<br>(C3H5O3-), 96.96840 (H2PO4-),<br>101.02325 (C4H5O3-), 113.02351<br>(C5H5O3-), 152.99548 (C3H6PO5-)                                                                                           | 824.38413 | 184.07336 (C5H15NPO4+), 328.26343<br>(C22H34NO+)                                            |
|     |  | 7.62 | 466.25781 | 1st peak has 59.01250 (C2H3O2-),<br>78.95769 (PO3-), 140.01103<br>(C2H7PO4-), 214.04845<br>(C5H13NPO6-), 269.21201<br>(C16H29O3-); 2nd peak has<br>78.95779 (PO3-), 96.96850<br>(H2PO4-), 140.01118 (C2H7PO4-),<br>152.99538 (C3H6PO5-), 171.00612<br>(C3H8PO6-), 214.04860<br>(C5H13NPO6-) |           |                                                                                             |
| GPE |  | 7.63 | 470.23154 | 78.95778 (PO3-), 96.96850<br>(H2PO4-), 140.01118 (C2H7PO4-),<br>152.99538 (C3H6PO5-), 171.00612<br>(C3H8PO6-), 214.04858<br>(C5H13NPO6-)                                                                                                                                                    | 472.24604 | 124.07578 (C7H10NO+), 300.23193<br>(C20H30NO+)                                              |
| GPE |  | 7.66 | 472.24744 | 78.95784 (PO3-), 96.96852<br>(H2PO4-), 152.99535 (C3H6PO5-),<br>171.00609 (C3H8PO6-), 2nd peak<br>additionally has 140.01122<br>(C2H7PO4-), 214.04860<br>(C5H13NPO6-)                                                                                                                       | 474.26194 | 302.24777 (C20H32NO+)                                                                       |
| GPE |  | 7.68 | 436.24716 | 78.95781 (PO3-), 96.96855<br>(H2PO4-), 152.99542 (C3H6PO5-),<br>171.00615 (C3H8PO6-), 362.20999<br>(C17H33NPO5-)                                                                                                                                                                            | 438.26175 | 266.24762 (C17H32ON+)                                                                       |
|     |  | 7.79 | 424.24738 |                                                                                                                                                                                                                                                                                             | 426.26188 | 254.24762 (C16H32NO+)                                                                       |
|     |  | 7.88 | 724.27441 |                                                                                                                                                                                                                                                                                             |           |                                                                                             |
| GPE |  | 8.25 | 474.26285 | 78.95782 (PO3-), 96.96849<br>(H2PO4-), 152.99532 (C3H6PO5-),<br>171.00606 (C3H8PO6-)                                                                                                                                                                                                        | 476.27735 | 304.26334 (C20H34NO+)                                                                       |
| EA  |  | 9.75 | 372.23126 |                                                                                                                                                                                                                                                                                             | 338.26868 | 62.06081 (C2H8NO+), 217.19504<br>(C16H25+), 259.20547 (C18H27O+),<br>320.25839 (C20H34NO2+) |

|    |  |       |           |  |           |                                                                                                                                                                                                                  |
|----|--|-------|-----------|--|-----------|------------------------------------------------------------------------------------------------------------------------------------------------------------------------------------------------------------------|
| EA |  | 9.96  | 352.20535 |  | 318.24258 | 62.06080 (C <sub>2</sub> H <sub>8</sub> NO <sup>+</sup> ), 300.23163 (C <sub>2</sub> O <sub>3</sub> NO <sup>+</sup> )                                                                                            |
| EA |  | 10.25 | 330.22098 |  | 296.25842 | 62.06083 (C <sub>2</sub> H <sub>8</sub> NO <sup>+</sup> ), 278.24796 (C <sub>18</sub> H <sub>32</sub> NO <sup>+</sup> ), 279.23199 (C <sub>18</sub> H <sub>31</sub> O <sub>2</sub> <sup>+</sup> )                |
| EA |  | 10.63 | 354.22104 |  | 320.25833 | 62.06079 (C <sub>2</sub> H <sub>8</sub> NO <sup>+</sup> ), 302.24847 (C <sub>2</sub> O <sub>3</sub> NO <sup>+</sup> )                                                                                            |
| EA |  | 11.12 | 382.25238 |  | 348.28983 | 62.06082 (C <sub>2</sub> H <sub>8</sub> NO <sup>+</sup> ), 330.27908 (C <sub>22</sub> H <sub>36</sub> NO <sup>+</sup> ), 331.26379 (C <sub>22</sub> H <sub>35</sub> O <sub>2</sub> <sup>+</sup> , only 1st peak) |

**Table S4. Differential metabolites from *C. elegans* L1 medium, ES+ mode, that are decreased or absent in *daf-22* medium compared to N2. Peaks that are present but not differential in growth medium are shown in blue. Peaks that are also differential in growth medium are shown in red. Peaks that are also in growth medium table (ES+) are shown in bold red. Entries that have a corresponding peak in the ES- table are shaded grey.**

| class | smid-db | rt (min) | m/z (ES+)        | MS/MS (ES+)                                                                                                                                                                                  | m/z (ES-) | MS/MS (ES-)                                |
|-------|---------|----------|------------------|----------------------------------------------------------------------------------------------------------------------------------------------------------------------------------------------|-----------|--------------------------------------------|
| ascr  |         | 0.94     | 347.25381        | 72.08144 (C4H10N+), 84.08134 (C5H10N+), 101.10774 (C5H13N2+), 217.19107 (C11H25N2O2+)                                                                                                        |           |                                            |
|       |         | 0.95     | 375.26035        | 70.06583 (C4H8N+), 112.08727 (C5H10N3+), 118.08649 (C5H12NO2+), 210.16002 (C11H20N3O+), 228.17076 (C11H22N3O2+), 358.23364 (C17H32N3O5+)                                                     |           |                                            |
|       |         | 0.96     | 404.31207        | 70.06592 (C4H8N+), 72.08149 (C4H10N+), 84.08131 (C5H10N+), 112.11236 (C7H14N+), 129.13867 (C7H17N2+)                                                                                         |           |                                            |
| ascr  |         | 1.11     | 373.26987        | 84.08133 (C5H10N+), 127.12309 (C7H15N2+), 355.25900 (C19H35N2O4+)                                                                                                                            |           |                                            |
| ascr  |         | 1.42     | 334.18622        | see L1s, ES- table                                                                                                                                                                           |           |                                            |
| ascr  | bhas#9  | 1.47     | 287.11014        | see L1s, ES- table                                                                                                                                                                           |           |                                            |
| ascr  |         | 2.89     | 285.13120        |                                                                                                                                                                                              |           |                                            |
|       |         | 2.89     | 308.20715        | 115.07573 (C6H11O2+)                                                                                                                                                                         |           |                                            |
| ascr  |         | 3.00     | <b>316.21219</b> | 55.05509 (C4H7+), 70.06583 (C4H8N+), 99.08086 (C6H11O+), 126.09148 (C7H12NO+), 186.14891 (C10H20NO2+), 200.12817 (C10H18NO3+)                                                                |           |                                            |
| ascr  |         | 3.16     | <b>389.26471</b> | 84.08133 (C5H10N+), 114.09160 (C6H12NO+), 143.11794 (C7H15N2O+), 241.19069 (C13H25N2O2+), 259.20148 (C13H27N2O3+), 273.18069 (C13H25N2O4+)                                                   |           |                                            |
| ascr  |         | 3.25     | 447.27020        | 72.08138 (C4H10N+), 86.09697 (C5H12N+), 98.09681 (C6H12N+), 100.07607 (C5H10NO+), 114.09164 (C6H12NO+), 157.13361 (C8H17N2O+), 201.12344 (C9H17N2O3+), 317.20676 (C15H29N2O5+)               |           |                                            |
|       |         | 3.27     | 383.22900        |                                                                                                                                                                                              |           |                                            |
| ascr  |         | 3.27     | 369.23856        | 123.09186 (C7H11N2+), 239.17532 (C13H23N2O2+)                                                                                                                                                |           |                                            |
| ascr  |         | 3.29     | 374.25378        | 84.08135 (C5H10N+), 128.10713 (C7H14NO+)                                                                                                                                                     |           |                                            |
| ascr  |         | 3.34     | 388.23294        | 100.07612 (C5H10NO+), 142.08636 (C7H12NO2+), 258.16998 (C13H24NO4+)                                                                                                                          |           |                                            |
| S     |         | 3.39     | 306.10068        | see L1s, ES- table                                                                                                                                                                           |           |                                            |
| ascr  |         | 3.39     | 461.28604        | 114.09165 (C6H12NO+), 138.09137 (C8H12NO+), 155.11789 (C8H15N2O+), 169.13345 (C9H17N2O+), 197.12852 (C10H17N2O2+), 215.13913 (C10H19N2O3+), 231.17030 (C11H23N2O3+), 331.22275 (C16H31N2O5+) |           |                                            |
| ascr  |         | 3.49     | <b>330.22763</b> | 84.08132 (C5H10N+), 200.16452 (C11H22NO2+), 214.14372 (C11H20NO3+)                                                                                                                           |           |                                            |
| EA    |         | 3.56     | <b>216.12321</b> | 62.06084 (C2H8NO+), 81.07048 (C6H9+), 109.06518 (C7H9O+), 127.07554 (C7H11O2+), 137.05978 (C8H9O2+), 170.11757 (C9H16NO2+), 180.10194 (C10H14NO2+), 198.11259 (C10H16NO3+)                   | 214.10848 | 86.02355 (C3H4NO2-), 170.11836 (C9H16NO2-) |
| ascr  |         | 3.60     | <b>255.12036</b> |                                                                                                                                                                                              |           |                                            |
| ascr  |         | 3.62     | 475.30209        | 114.09162 (C6H12NO+), 152.10703 (C9H14NO+), 169.13338 (C9H17N2O+), 213.12335 (C10H17N2O3+), 229.15469 (C11H21N2O3+), 345.23862 (C17H33N2O5+)                                                 |           |                                            |
| ascr  |         | 3.78     | 318.22772        | 72.08147 (C4H10N+), 99.08088 (C6H11O+), 170.15393 (C10H20NO+), 184.13326 (C10H18NO2+), 188.16463 (C10H22NO2+), 202.14383 (C10H20NO3+)                                                        |           |                                            |
| ascr  | osas#14 | 3.80     | 681.26385        | see L1s, ES- table                                                                                                                                                                           |           |                                            |
|       |         | 3.89     | <b>293.12323</b> |                                                                                                                                                                                              |           |                                            |
| ascr  |         | 3.89     | 390.24841        | 99.08088 (C6H11O+), 116.10731                                                                                                                                                                |           |                                            |

|      |               |      |           |                                                                                                                                                                                                                      |           |                                                                                                                                                                                                     |
|------|---------------|------|-----------|----------------------------------------------------------------------------------------------------------------------------------------------------------------------------------------------------------------------|-----------|-----------------------------------------------------------------------------------------------------------------------------------------------------------------------------------------------------|
|      |               |      |           | (C6H14NO+), 144.10197 (C7H14NO2+)                                                                                                                                                                                    |           |                                                                                                                                                                                                     |
| ascr | osas#15       | 3.92 | 569.27057 | see L1s, ES- table                                                                                                                                                                                                   |           |                                                                                                                                                                                                     |
| S    |               | 3.99 | 320.11633 | 84.04494 (C4H6NO+), 102.05531 (C4H8NO2+), 144.06554 (C6H10NO3+)                                                                                                                                                      | 318.10168 | 66.03363 (C4H4N-), 110.02380 (C5H4NO2-), 142.05031 (C6H8NO3-), 175.04321 (C7H11SO3-)                                                                                                                |
| ascr |               | 3.99 | 333.12207 | 173.04849 (C6H13CaO3+), 191.05907 (C6H15CaO4+), 203.05910 (C7H15CaO4+), 217.07474 (C8H17CaO4+)                                                                                                                       |           |                                                                                                                                                                                                     |
| ascr |               | 4.09 | 331.10614 | 56.96560 (CaOH+), 173.4852 (C6H13CaO3+), 191.05902 (C6H15CaO4+), 201.04338 (C7H13CaO4+), 215.05904 (C8H15CaO4+)                                                                                                      |           |                                                                                                                                                                                                     |
| ascr | osas#16       | 4.26 | 549.24268 | see L1s, ES- table                                                                                                                                                                                                   |           |                                                                                                                                                                                                     |
| ascr | glosas#9      | 4.31 | 510.19763 | see 528.20850, 510.19763 in L1s, ES- table                                                                                                                                                                           |           |                                                                                                                                                                                                     |
| ascr | osas#23       | 4.41 | 565.31244 | 136.07578 (C8H10NO+), 200.16461 (C11H22NO2+), 218.08139 (C12H12NO3+), 236.09175 (C12H14NO4+), 348.14426 (C18H22NO6+)                                                                                                 |           |                                                                                                                                                                                                     |
| ascr |               | 4.43 | 376.23325 | see L1s, ES- table                                                                                                                                                                                                   |           |                                                                                                                                                                                                     |
| ascr | osas#24       | 4.63 | 550.22723 | 276.08438 (C12H15NO5Na+), 388.13629 (C18H23NO7Na+)                                                                                                                                                                   | 526.23096 | 59.01253 (C2H3O2-), 73.02815 (C3H5O3-), 82.02860 (C4H4NO-), 98.02366 (C4H4NO2-), 119.04939 (C8H7O-), 121.02865 (C7H5O2-), 133.0878 (C8H5O2-), 216.06671 (C12H10NO3-), 291.14514 (C13H23O7-, bhas#1) |
| ascr | glosas#2      | 4.69 | 661.31915 | see L1s, ES- table                                                                                                                                                                                                   |           |                                                                                                                                                                                                     |
| ascr |               | 4.78 | 303.09720 | 55.05509 (C4H7+), 76.97947 (C2H2OCl+), 83.04971 (C5H7O+), 85.06534 (C5H9O+), 113.06000 (C6H9O2+), 130.08633 (C6H12NO2+), 131.07037 (C6H11O3+), 133.04152 (C6H10OCl+), 148.09677 (C6H14NO3+), 151.05205 (C6H12O2Cl+), |           |                                                                                                                                                                                                     |
|      |               | 4.88 | 450.23343 | see L1s, ES- table                                                                                                                                                                                                   |           |                                                                                                                                                                                                     |
| ascr | ascr#81       | 4.93 | 393.16550 | see L1s, ES- table                                                                                                                                                                                                   |           |                                                                                                                                                                                                     |
|      |               | 5.10 | 286.01563 |                                                                                                                                                                                                                      |           |                                                                                                                                                                                                     |
|      |               | 5.20 | 297.16769 | 55.05507 (C4H7+), 109.10149 (C8H13+), 113.05997 (C6H9O2+), 127.11182 (C8H15O+), 130.08629 (C6H12NO2+), 131.07030 (C6H11O3+), 145.12228 (C8H17O2+), 148.09677 (C6H14NO3+)                                             |           |                                                                                                                                                                                                     |
| EA   |               | 5.29 | 258.17038 | 62.06081 (C2H8NO+), 107.08591 (C8H11+), 133.10126 (C10H13+), 151.11179 (C10H15O+), 179.10666 (C11H15O2+), 222.14883 (C13H20NO2+), 240.15942 (C13H22NO3+)                                                             |           |                                                                                                                                                                                                     |
|      |               | 5.31 | 414.22516 |                                                                                                                                                                                                                      |           |                                                                                                                                                                                                     |
| ascr |               | 5.38 | 470.23608 | 104.10743 (C5H14NO+), 184.07335 (C10H11NONa+), 242.09966 (C9H17NO5Na+), 251.12526 (C12H20O4Na+), 340.17209 (C15H27NO6Na+)                                                                                            |           |                                                                                                                                                                                                     |
|      |               | 5.40 | 553.25049 | 137.04582 (C5H5N4O+), 287.14923 (C14H23O6+)                                                                                                                                                                          | 551.23599 |                                                                                                                                                                                                     |
| ascr |               | 5.46 | 492.22351 |                                                                                                                                                                                                                      |           |                                                                                                                                                                                                     |
| ascr | osas#7        | 5.49 | 532.21613 | see L1s, ES- table                                                                                                                                                                                                   |           |                                                                                                                                                                                                     |
| ascr | osas#25       | 5.56 | 494.23929 | 136.07574 (C8H10NO+), 200.07071 (C12H10NO2+), 218.08127 (C12H12NO3+), 236.09171 (C12H14NO4+), 348.14423 (C18H22NO6+)                                                                                                 |           |                                                                                                                                                                                                     |
| ascr | osas#1        | 5.56 | 534.23187 | see L1s, ES- table                                                                                                                                                                                                   |           |                                                                                                                                                                                                     |
| S    |               | 5.62 | 374.16348 | see L1s, ES- table                                                                                                                                                                                                   |           |                                                                                                                                                                                                     |
| ascr | osas#26       | 5.64 | 332.14948 | 101.02374 (C4H5O3+), 103.05470 (C8H7+), 113.06013 (C6H9O2+), 174.09152 (C11H12NO+), 184.07465 (C12H10NO+), 202.08632 (C12H12NO2+), 220.09694 (C12H14NO3+)                                                            |           |                                                                                                                                                                                                     |
| ascr | nuclas#33, 34 | 5.73 | 697.30518 | see L1s, ES- table                                                                                                                                                                                                   |           |                                                                                                                                                                                                     |

|      |                          |       |           |                                                                                                                                                                                                                  |  |
|------|--------------------------|-------|-----------|------------------------------------------------------------------------------------------------------------------------------------------------------------------------------------------------------------------|--|
|      |                          | 5.75  | 254.21161 |                                                                                                                                                                                                                  |  |
| GPE  |                          | 5.79  | 428.24146 | see L1s, ES- table                                                                                                                                                                                               |  |
| ascr | osas#22                  | 5.87  | 498.18970 | see L1s, ES- table                                                                                                                                                                                               |  |
| ascr |                          | 5.91  | 528.20850 | see 528.20850, 510.19763 in L1s, ES- table                                                                                                                                                                       |  |
| ascr | glosas#10,<br>glosas#101 | 5.92  | 702.33417 | see 528.20850, 510.19763 in L1s, ES- table                                                                                                                                                                       |  |
| S    |                          | 6.04  | 345.14813 | see L1s, ES- table                                                                                                                                                                                               |  |
|      |                          | 6.21  | 442.25711 |                                                                                                                                                                                                                  |  |
|      |                          | 6.22  | 488.22632 | 160.07321 (C8H11NONa+), 167.06798 (C7H12O3Na+), 251.12563 (C12H20O4Na+), 260.08902 (C12H15NO4Na+)                                                                                                                |  |
| ascr |                          | 6.41  | 325.19867 | 55.05507 (C4H7+), 81.07046 (C6H9+), 95.08597 (C7H11+), 113.06001 (C6H9O2+), 130.08638 (C6H12NO2+), 131.07031 (C6H11O3+), 137.13248 (C10H17+), 148.09676 (C6H14NO3+), 155.14301 (C10H19O+), 173.15358 (C10H21O2+) |  |
| GPE  |                          | 7.86  | 634.29944 | see L1s, ES- table                                                                                                                                                                                               |  |
| GPE  |                          | 8.04  | 450.26187 | see L1s, ES- table                                                                                                                                                                                               |  |
| GPE  |                          | 8.09  | 600.31494 | see L1s, ES- table                                                                                                                                                                                               |  |
|      |                          | 14.77 | 605.33514 |                                                                                                                                                                                                                  |  |



**Table S5. Differential metabolites from *C. elegans* growth medium, ES+ mode, that are decreased or absent in *daf-22* medium compared to N2. Peaks that are present but not differential in L1 medium are shown in blue. Peaks that are also differential in L1 medium are shown in red. Peaks that are also in L1 medium table (ES+) are shown in bold red. Manually added entries are shaded pink. Entries that have a corresponding peak in the ES- table are shaded grey.**

| class | smid-db       | rt (min) | m/z (ES+)        | MS/MS (ES+)                                                                                                                           | m/z (ES-) | MS/MS (ES-)                                                                                                                                                             |
|-------|---------------|----------|------------------|---------------------------------------------------------------------------------------------------------------------------------------|-----------|-------------------------------------------------------------------------------------------------------------------------------------------------------------------------|
|       |               | 0.96     | 268.20160        |                                                                                                                                       |           |                                                                                                                                                                         |
| ascr  | uglas#11      | 2.87     | 669.20178        | see growth medium, ES- table                                                                                                          |           |                                                                                                                                                                         |
| ascr  |               | 3.02     | <b>316.21194</b> | see L1, ES+ table                                                                                                                     |           |                                                                                                                                                                         |
| ascr  |               | 3.58     | <b>330.22763</b> | see L1, ES+ table                                                                                                                     |           |                                                                                                                                                                         |
| ascr  |               | 4.42     | 788.24023        |                                                                                                                                       | 786.22573 | 78.95783 (PO3-), 92.04945 (C6H6N-), 96.96856 (H2PO4-), 124.01461 (C4H2N3O2-), 136.03973 (C7H6NO2-), 150.03056 (C6H4N3O2-), 167.02078 (C5H3N4O3-), 178.02574 (C7H4N3O3-) |
| ascr  |               | 4.45     | 621.18109        | see growth medium, ES- table                                                                                                          |           |                                                                                                                                                                         |
| ascr  |               | 4.64     | 211.03685        | see growth medium, ES- table                                                                                                          |           |                                                                                                                                                                         |
| ascr  | ascr#82       | 4.76     | 652.27191        | see growth medium, ES- table                                                                                                          |           |                                                                                                                                                                         |
| ascr  |               | 4.96     | 640.24683        | see growth medium, ES- table                                                                                                          |           |                                                                                                                                                                         |
| ascr  |               | 5.00     | <b>482.26001</b> | see growth medium, ES- table                                                                                                          |           |                                                                                                                                                                         |
| ascr  |               | 5.05     | 794.28632        | see growth medium, ES- table                                                                                                          |           |                                                                                                                                                                         |
|       |               | 5.13     | 373.12213        |                                                                                                                                       |           |                                                                                                                                                                         |
| ascr  |               | 5.17     | 576.18439        | see growth medium, ES- table                                                                                                          |           |                                                                                                                                                                         |
| ascr  | nuclas#35, 36 | 5.25     | <b>668.27832</b> | see growth medium, ES- table                                                                                                          |           |                                                                                                                                                                         |
|       |               | 5.46     | 941.35510        | 136.06175 (C5H6N5+), 292.11786 (C15H18NO5+), 422.20306 (C19H28N5O6+), 427.17346, 525.14929                                            | 939.34060 | 78.95783 (PO3-), 96.96856 (H2PO4-)                                                                                                                                      |
|       |               | 5.51     | 309.16736        |                                                                                                                                       | 285.17096 | 57.03328 (C3H5O-), 73.02824 (C3H5O2-), 87.04402 (C4H7O2-), 101.05977 (C5H9O2-), 115.07568 (C6H11O2-), 125.09643 (C8H13O-), 169.12325 (C10H17O2-), 241.18098 (C14H25O3-) |
| ascr  |               | 5.66     | 569.27179        | 109.06510 (C7H9O+), 127.07547 (C7H11O2+), 134.06007 (C8H8NO+), 213.12360 (C10H17N2O3+), 264.12317 (C14H18NO4+), 289.12857 (C13H31O7+) |           |                                                                                                                                                                         |
| EA    |               | 5.68     | 232.19093        | 62.06082 (C2H8NO+), 214.18016 (C12H24NO2+)                                                                                            | 266.15311 |                                                                                                                                                                         |
| ascr  | anglas#7      | 5.71     | 556.23993        | see growth medium, ES- table                                                                                                          |           |                                                                                                                                                                         |
| ascr  | iglas#71      | 5.74     | 616.21661        | see growth medium, ES- table                                                                                                          |           |                                                                                                                                                                         |
| EA    |               | 5.76     | 238.18028        | 62.06084 (C2H8NO+), 177.12737 (C12H17O+)                                                                                              |           |                                                                                                                                                                         |
| ascr  | iglas#9       | 5.78     | 527.26056        |                                                                                                                                       |           |                                                                                                                                                                         |
| ascr  | anglas#1      | 5.79     | 558.25586        | see growth medium, ES- table                                                                                                          |           |                                                                                                                                                                         |
| ascr  | iglas#11      | 5.81     | 618.23218        | see growth medium, ES- table                                                                                                          |           |                                                                                                                                                                         |
|       |               | 6.01     | 541.27655        | 115.07555 (C6H11O2+), 118.06532 (C8H8N+), 130.06516 (C9H8N+), 230.11736 (C14H16NO2+)                                                  |           |                                                                                                                                                                         |
| ascr  | nuclas#31, 32 | 6.11     | 580.29858        | 164.09306 (C7H10N5+), 450.23474 (C21H32N5O6+)                                                                                         |           |                                                                                                                                                                         |
| ascr  | iglas#7       | 6.20     | 536.25000        | see growth medium, ES- table                                                                                                          |           |                                                                                                                                                                         |
| EA    |               | 6.21     | 246.20634        | 62.06082 (C2H8NO+), 228.19574 (C13H26NO2+)                                                                                            | 280.16852 |                                                                                                                                                                         |
| ascr  |               | 6.32     | 644.24701        | see growth medium, ES- table                                                                                                          |           |                                                                                                                                                                         |
| ascr  | iglas#1       | 6.33     | 538.26520        | see growth medium, ES- table                                                                                                          |           |                                                                                                                                                                         |
|       |               | 6.37     | 419.14505        | see growth medium, ES- table                                                                                                          |           |                                                                                                                                                                         |
| ascr  | anglas#3      | 6.39     | 584.27100        | 95.04955 (C6H7O+), 109.10147 (C8H13+), 113.05993 (C6H9O2+), 120.04453 (C7H6NO+), 127.03904 (C6H7O3+), 138.05490 (C7H8NO2+),           | 618.23328 |                                                                                                                                                                         |

|      |          |      |           |                                                                                                                                                                                                                                                                                        |                         |                        |
|------|----------|------|-----------|----------------------------------------------------------------------------------------------------------------------------------------------------------------------------------------------------------------------------------------------------------------------------------------|-------------------------|------------------------|
|      |          |      |           | 155.10651 (C9H15O2+), 173.11714 (C9H17O3+), 228.06528 (C13H10NO3+), 250.10718 (C13H16NO4+), 263.12766 (C15H19O4+), 268.11780 (C13H18NO5+), 281.13806 (C15H21O5+), 299.14890 (C15H23O6+), 317.15912 (C15H25O7+), 400.17484 (C22H26NO6+), 418.18643 (C22H28NO7+), 436.19629 (C22H30NO8+) |                         |                        |
| EA   |          | 6.67 | 284.22232 | 62.06081 (C2H8NO+), 266.21130 (C16H28NO2+)                                                                                                                                                                                                                                             | 318.1845,<br>328.21347  | 210.14990 (C12H20NO2-) |
| GPE  |          | 6.70 | 572.28406 | see growth medium, ES- table                                                                                                                                                                                                                                                           |                         |                        |
| EA   |          | 6.75 | 352.24823 | 62.06080 (C2H8NO+), 316.22699 (C20H30NO2+), 334.23685 (C20H32NO3+)                                                                                                                                                                                                                     | 396.23938               | 262.18118 (C16H24NO2-) |
| GPE  |          | 6.78 | 584.28400 | see growth medium, ES- table                                                                                                                                                                                                                                                           |                         |                        |
|      |          | 6.81 | 704.34064 | 127.03909 (C6H7O3+), 136.07561 (C8H10NO+), 141.09120 (C8H13O2+), 159.10146 (C8H15O3+), 285.13284 (C14H21O6+), 295.19016 (C17H27O4+)                                                                                                                                                    | 702.32600               |                        |
| EA   |          | 6.81 | 274.23782 | 62.06080 (C2H8NO+), 256.22687 (C15H30NO2+)                                                                                                                                                                                                                                             | 308.20000,<br>318.22888 |                        |
| EA   |          | 6.82 | 258.20651 | see growth medium, ES- table                                                                                                                                                                                                                                                           |                         |                        |
| ascr | iglas#3  | 6.82 | 581.30725 |                                                                                                                                                                                                                                                                                        |                         |                        |
| EA   |          | 6.83 | 272.22192 | 62.06082 (C2H8NO+), 254.21123 (C15H28NO2+)                                                                                                                                                                                                                                             |                         |                        |
| ascr |          | 6.87 | 581.30774 | see growth medium, ES- table                                                                                                                                                                                                                                                           |                         |                        |
| GPE  |          | 6.87 | 608.28345 | see growth medium, ES- table                                                                                                                                                                                                                                                           |                         |                        |
|      |          | 6.97 | 408.20172 | 106.02904 (C6H4NO+), 113.05995 (C6H9O2+), 124.03940 (C6H6NO2+), 178.08611 (C10H12NO2+), 236.09152 (C12H14NO4+), 254.10194 (C12H16NO5+)                                                                                                                                                 | 406.18722               |                        |
| EA   |          | 7.03 | 260.22202 | see growth medium, ES- table                                                                                                                                                                                                                                                           |                         |                        |
| EA   |          | 7.06 | 324.21695 | 62.06083 (C2H8NO+), 288.19537 (C18H26NO2+), 306.20636 (C18H28NO3+)                                                                                                                                                                                                                     | 358.17913               |                        |
| EA   |          | 7.07 | 598.29926 | see growth medium, ES- table                                                                                                                                                                                                                                                           |                         |                        |
| ascr | puglas#7 | 7.08 | 668.29645 | 134.04620 (C5H4N5+), 165.02325 (C6H5N4S+), 182.04944 (C6H8N5S+), 194.04953 (C7H8N5S+), 250.11186 (C11H16N5S+), 538.23254 (C24H36N5SO7+)                                                                                                                                                |                         |                        |
| ascr | puglas#1 | 7.16 | 670.31238 | 134.04613 (C5H4N5+), 152.05659 (C5H6N5O+), 165.02287 (C6H5N4S+), 182.04953 (C6H8N5S+), 194.04953 (C7H8N5S+), 224.05968 (C8H10N5SO+), 250.11194 (C11H16N5S+), 380.17499 (C17H26N5SO3+), 472.18652 (C19H30N5SO7+), 540.24896 (C24H38N5SO7+)                                              |                         |                        |
| GPE  |          | 7.21 | 620.28357 | see growth medium, ES- table                                                                                                                                                                                                                                                           |                         |                        |
| GPE  |          | 7.29 | 634.29919 | see growth medium, ES- table                                                                                                                                                                                                                                                           |                         |                        |
| EA   |          | 7.33 | 310.23758 | see growth medium, ES- table                                                                                                                                                                                                                                                           |                         |                        |
| EA   |          | 7.39 | 292.22702 | 62.06083 (C2H8NO+)                                                                                                                                                                                                                                                                     |                         |                        |
| EA   |          | 7.41 | 268.22708 | 62.06083 (C2H8NO+)                                                                                                                                                                                                                                                                     |                         |                        |
| GPE  |          | 7.45 | 438.26175 | see growth medium, ES- table                                                                                                                                                                                                                                                           |                         |                        |
| GPE  |          | 7.45 | 600.31464 | see growth medium, ES- table                                                                                                                                                                                                                                                           |                         |                        |
|      | puglas#3 | 7.60 | 696.32758 |                                                                                                                                                                                                                                                                                        |                         |                        |
| GPE  |          | 7.90 | 612.31458 | see growth medium, ES- table                                                                                                                                                                                                                                                           |                         |                        |
| EA   |          | 8.26 | 336.25296 | 62.06081 (C2H8NO+)                                                                                                                                                                                                                                                                     | 370.21514,<br>380.24457 |                        |
|      |          | 8.26 | 266.24777 |                                                                                                                                                                                                                                                                                        |                         |                        |
| EA   |          | 9.21 | 256.22696 | 62.06081 (C2H8NO+), 238.21642 (C15H28NO+), 239.20039 (C15H27O2+)                                                                                                                                                                                                                       | 290.18914               |                        |
| EA   |          | 9.26 | 244.22708 | 62.06081 (C2H8NO+), 226.21649 (C14H28NO+), 227.20047 (C14H27O2+)                                                                                                                                                                                                                       | 278.18926               |                        |
|      |          | 9.35 | 443.34775 | 112.07600 (C6H10NO+), 130.08635 (C6H12NO2+), 140.07057 (C7H10NO2+), 158.08115 (C7H12NO3+), 250.25275 (C17H32N+), 346.27353 (C22H36NO2+), 425.33777 (C24H45N2O4+)                                                                                                                       | 477.30993               |                        |
| EA   |          | 9.64 | 282.24268 | 62.06081 (C2H8NO+), 264.23169 (C17H30NO+), 265.21585 (C17H29O2+)                                                                                                                                                                                                                       | 316.20486               |                        |
| EA   |          | 9.65 | 314.26880 | 62.06082 (C2H8NO+), 296.25833                                                                                                                                                                                                                                                          | 348.23098,              | 100.03935 (C4H6NO2-),  |

|    |  |       |                           |                                                                                                                                                                                                                                                                                              |                         |                                               |
|----|--|-------|---------------------------|----------------------------------------------------------------------------------------------------------------------------------------------------------------------------------------------------------------------------------------------------------------------------------------------|-------------------------|-----------------------------------------------|
|    |  |       |                           | (C18H34NO <sub>2</sub> <sup>+</sup> )                                                                                                                                                                                                                                                        | 358.26010               | 102.05502 (C4H8NO <sub>2</sub> <sup>-</sup> ) |
| EA |  | 9.73  | <a href="#">338.26868</a> | see growth medium, ES- table                                                                                                                                                                                                                                                                 |                         |                                               |
| EA |  | 9.77  | <a href="#">270.24255</a> | 62.06081 (C2H8NO <sup>+</sup> ), 252.23170 (C16H30NO <sup>+</sup> ), 253.21591 (C16H29O <sub>2</sub> <sup>+</sup> )                                                                                                                                                                          | 304.20473               |                                               |
| EA |  | 9.86  | <a href="#">258.24274</a> | 62.06079 (C2H8NO <sup>+</sup> ), 240.23184 (C15H30NO <sup>+</sup> ), 241.21596 (C15H29O <sub>2</sub> <sup>+</sup> )                                                                                                                                                                          | 292.20492,<br>302.23392 |                                               |
| EA |  | 9.90  | 294.24265                 | 62.06081 (C2H8NO <sup>+</sup> ), 276.23203 (C18H30NO <sup>+</sup> ), 277.21661 (C18H29O <sub>2</sub> <sup>+</sup> )                                                                                                                                                                          | 328.20483,<br>338.23401 |                                               |
| EA |  | 9.92  | <a href="#">318.24258</a> | see growth medium, ES- table                                                                                                                                                                                                                                                                 |                         |                                               |
|    |  | 10.07 | 586.42365                 | 98.98460 (H4PO <sub>4</sub> <sup>+</sup> ), 140.01082 (C2H7NPO <sub>4</sub> <sup>+</sup> ), 155.04677 (C4H12PO <sub>4</sub> <sup>+</sup> ), 211.10945 (C8H20PO <sub>4</sub> <sup>+</sup> ), 267.17200 (C12H28PO <sub>4</sub> <sup>+</sup> ), 320.25824 (C20H34NO <sub>2</sub> <sup>+</sup> ) |                         |                                               |
| EA |  | 10.11 | <a href="#">320.25833</a> | see growth medium, ES- table                                                                                                                                                                                                                                                                 |                         |                                               |
| EA |  | 10.18 | 308.25827                 | 62.06081 (C2H8NO <sup>+</sup> ), 290.24777 (C19H32NO <sup>+</sup> ), 291.23239 (C19H31O <sub>2</sub> <sup>+</sup> )                                                                                                                                                                          | 342.22045               |                                               |
| EA |  | 10.20 | <a href="#">296.25842</a> | see growth medium, ES- table                                                                                                                                                                                                                                                                 |                         |                                               |
| EA |  | 10.38 | <a href="#">284.25839</a> | 62.06083 (C2H8NO <sup>+</sup> ), 266.24774 (C17H32NO <sup>+</sup> ), 267.23151 (C17H31O <sub>2</sub> <sup>+</sup> )                                                                                                                                                                          | 318.22057,<br>328.24960 |                                               |
| EA |  | 10.61 | <a href="#">272.25845</a> | 62.06081 (C2H8NO <sup>+</sup> ), 254.24777 (C16H32NO <sup>+</sup> ), 255.23174 (C16H31O <sub>2</sub> <sup>+</sup> )                                                                                                                                                                          | 306.22063,<br>316.24966 |                                               |
| EA |  | 10.67 | <a href="#">346.27405</a> | 62.06081 (C2H8NO <sup>+</sup> ), 328.26282 (C22H34NO <sup>+</sup> )                                                                                                                                                                                                                          | 380.23623,<br>390.26520 |                                               |
| EA |  | 10.80 | <a href="#">322.27420</a> | 62.06079 (C2H8NO <sup>+</sup> ), 304.26352 (C20H34NO <sup>+</sup> )                                                                                                                                                                                                                          | 356.23638,<br>366.26501 |                                               |
| EA |  | 10.97 | <a href="#">298.27399</a> | 62.06082 (C2H8NO <sup>+</sup> ), 280.26331 (C18H34NO <sup>+</sup> ), 281.24756 (C18H33O <sub>2</sub> <sup>+</sup> )                                                                                                                                                                          | 332.23617,<br>342.26517 |                                               |
| EA |  | 11.08 | <a href="#">348.28983</a> | see growth medium, ES- table                                                                                                                                                                                                                                                                 |                         |                                               |
| EA |  | 11.75 | <a href="#">350.30542</a> | 62.06083 (C2H8NO <sup>+</sup> ), *332.29437 (C22H38NO <sup>+</sup> ), *333.27859 (C22H37O <sub>2</sub> <sup>+</sup> ); *only in the 2nd peak                                                                                                                                                 | 384.2676,<br>394.29666  |                                               |
| EA |  | 12.15 | <a href="#">326.30548</a> | 62.06079 (C2H8NO <sup>+</sup> ), 308.29468 (C20H38NO <sup>+</sup> ), 309.27850 (C20H37O <sub>2</sub> <sup>+</sup> )                                                                                                                                                                          | 360.26766               |                                               |

**Table S6. Differential metabolites from *C. elegans* L1 medium, ES- mode, that are decreased or absent in N2 medium compared to *daf-22*. Peaks that are also differential in growth medium are shown in red. Peaks that are also in growth medium table (ES-) are shown in bold red. Entries that have a corresponding peak in the ES+ table are shaded grey.**

| class | rt (min) | m/z (ES-)        | MS/MS (ES-)                                                                                                                                                                                                              | m/z (ES+)                       | MS/MS (ES+)                                                                                                                                                                      |
|-------|----------|------------------|--------------------------------------------------------------------------------------------------------------------------------------------------------------------------------------------------------------------------|---------------------------------|----------------------------------------------------------------------------------------------------------------------------------------------------------------------------------|
| GPE   | 1.13     | <b>486.03470</b> | 78.95782 (PO3-), 96.96855 (H2PO4-), 152.99547 (C3H6PO5-), 333.05939 (C9H18PO11-)                                                                                                                                         | 488.04901                       | 153.98210 (C4H6NOCI2+)                                                                                                                                                           |
| GPE   | 1.18     | 323.98166        | 78.95779 (PO3-), 96.96844 (H2PO4-), 152.99535 (C3H6PO5-), 171.00615 (C3H8PO6-)                                                                                                                                           | 325.99576                       | 82.94549 (CHCl2+), 153.98201 (C4H6NOCI2+)                                                                                                                                        |
|       | 4.40     | <b>245.10333</b> |                                                                                                                                                                                                                          |                                 |                                                                                                                                                                                  |
|       | 4.92     | 391.19809        | 59.01260 (C2H3O2-), 71.01263 (C3H3O2-), 73.02826 (C3H5O2-), 83.01274 (C4H3O2-), 85.02834 (C4H5O2-), 101.02338 (C4H5O3-), 113.02346 (C5H5O3-)                                                                             | 410.23889, 415.19431            |                                                                                                                                                                                  |
| GPE   | 5.07     | 498.24835        | 78.95783 (PO3-), 140.01138 (C2H7NPO4-), 152.99551 (C3H6PO5-), 171.00623 (C3H8PO6-), 214.04877 (C5H13NPO6-)                                                                                                               |                                 |                                                                                                                                                                                  |
| GPE   | 5.29     | <b>382.16431</b> | 78.95782 (PO3-), 140.01129 (C2H7NPO4-), 152.99548 (C3H6PO5-), 171.00624 (C3H8PO6-), 214.04874 (C5H13NPO6-)                                                                                                               | 384.17881                       |                                                                                                                                                                                  |
| GPE   | 5.39     | 512.22736        | first two peaks: 78.95784 (PO3-), 140.01129 (C2H7NPO4-), 152.99556 (C3H6PO5-), 171.00635 (C3H8PO6-), 214.04875 (C5H13NPO6-); 3rd peak: 78.95783 (PO3-), 96.96858 (H2PO4-), 152.99564 (C3H6PO5-), 350.17380 (C15H29NPO6-) |                                 |                                                                                                                                                                                  |
| GPE   | 5.61     | 538.24310        | 78.95785 (PO3-), 140.01137 (C2H7NPO4-), 152.99565 (C3H6PO5-), 171.00627 (C3H8PO6-), 214.04880 (C5H13NPO6-)                                                                                                               | 540.25760                       |                                                                                                                                                                                  |
| GPE   | 5.67     | 524.26355        | 78.95784 (PO3-), 140.01129 (C2H7NPO4-), 152.99547 (C3H6PO5-), 171.00612 (C3H8PO6-), 214.04872 (C5H13NPO6-)                                                                                                               | 526.27805                       |                                                                                                                                                                                  |
| GPE   | 5.68     | 512.26349        | 78.95783 (PO3-), 140.01129 (C2H7NPO4-), 152.99551 (C3H6PO5-), 171.00626 (C3H8PO6-), 214.04872 (C5H13NPO6-)                                                                                                               | 514.27799                       |                                                                                                                                                                                  |
|       | 5.72     | <b>395.18448</b> |                                                                                                                                                                                                                          | 378.24869                       | 181.15862 (C12H21O+), 199.16928 (C12H23O2+)                                                                                                                                      |
| GPE   | 5.82     | 470.25281        | 78.95786 (PO3-), 96.96865 (H2PO4-), 152.99556 (C3H6PO5-), 171.00627 (C3H8PO6-), 214.04848 (C5H13NPO6-)                                                                                                                   | 472.26731                       |                                                                                                                                                                                  |
| GPE   | 5.93     | 468.23712        | 78.95786 (PO3-), 140.01120 (C2H7NPO4-), 152.99544 (C3H6PO5-), 171.00616 (C3H8PO6-), 214.04865 (C5H13NPO6-)                                                                                                               | 452.24112, 470.25140, 492.23392 | 86.06057 (C4H8NO+), 280.22711 (C17H30NO2+)                                                                                                                                       |
| EA    | 6.06     | 374.25534        | 100.03941 (C4H6NO2-), 102.05493 (C4H8NO2-), 271.19156 (C15H27O4-)                                                                                                                                                        | 376.26947                       | 62.06083 (C2H8NO+), 304.22687 (C19H30NO2+), 322.23764 (C19H32NO3+), 340.24820 (C19H34NO4+), 358.25821 (C19H36NO5+)                                                               |
|       | 6.22     | <b>429.14563</b> |                                                                                                                                                                                                                          | 412.20975                       |                                                                                                                                                                                  |
| GPE   | 6.24     | 456.23746        | 78.95790 (PO3-), 96.96864 (H2PO4-), 140.01161 (C2H7NPO4-), 152.99562 (C3H6PO5-), 171.00627 (C3H8PO6-), 214.04898 (C5H13NPO6-)                                                                                            | 458.25196                       |                                                                                                                                                                                  |
| S     | 6.67     | 384.18564        | 63.96117 (SO2-), 73.98193 (C2H2SO-), 84.04429 (C4H6NO-), 99.98524 (C3H2NSO-), 115.00887 (C4H5NSO-), 177.01006 (C5H7NSO4-)                                                                                                | 386.19925                       | 74.00652 (C2H4NS+), 116.01665 (C4H6NSO+), 120.01156 (C3H6NSO2+), 120.99554 (C3H5SO3+), 138.02193 (C3H8NSO3+), 162.02185 (C5H8NSO3+), 180.03246 (C5H10NSO4+), 189.16370 (C14H21+) |
|       | 7.27     | <b>287.22308</b> |                                                                                                                                                                                                                          | 289.23758                       |                                                                                                                                                                                  |
| S     | 7.31     | 418.14670        | 63.96116 (SO2-), 99.98520 (C3H2NSO-), 115.00886 (C4H5NSO-), 177.01006 (C5H7NSO4-)                                                                                                                                        | 420.16120                       |                                                                                                                                                                                  |
|       | 7.33     | <b>405.24982</b> | see growth medium, ES- table                                                                                                                                                                                             |                                 |                                                                                                                                                                                  |
|       | 7.37     | <b>273.20749</b> | 59.01257 (C2H3O2-)                                                                                                                                                                                                       |                                 |                                                                                                                                                                                  |
|       | 7.63     | 295.19177        | 59.01252 (C2H3O2-), 87.04398 (C4H7O2-), 207.13919 (C13H19O2-)                                                                                                                                                            |                                 |                                                                                                                                                                                  |
|       | 7.67     | 489.34399        | 59.01259 (C2H3O2-), 73.02834 (C3H5O2-), 299.26010 (C18H35O3-)                                                                                                                                                            | 491.35849, 513.34003            |                                                                                                                                                                                  |

|      |       |           |                                                                                                                                                                                                                                                                                                                                       |                         |                                                                                                                                     |
|------|-------|-----------|---------------------------------------------------------------------------------------------------------------------------------------------------------------------------------------------------------------------------------------------------------------------------------------------------------------------------------------|-------------------------|-------------------------------------------------------------------------------------------------------------------------------------|
|      | 8.40  | 367.14517 |                                                                                                                                                                                                                                                                                                                                       | 369.15967               |                                                                                                                                     |
| GPE  | 8.49  | 642.32697 | 59.01258 (C2H3O2-), 71.01259 (C3H3O2-), 78.95784 (PO3-), 89.02328 (C3H5O3-), 96.96855 (H2PO4-), 101.02346 (C4H5O3-), 113.02355 (C5H5O3-), 119.03407 (C4H7O4-), 140.01123 (C2H7NPO4-), 152.99551 (C3H6PO5-), 171.00655 (C3H8PO6-), 333.05933 (C9H18PO11-), 376.10172 (C11H23NPO11-), 418.11206 (C13H25NPO12-), 480.27313 (C22H43NPO8-) | 644.34147               | 86.06055 (C4H8NO+), 98.06044 (C5H8NO+), 292.26324 (C19H34NO+), 310.27386 (C19H36NO2+)                                               |
|      | 8.51  | 517.37506 | 59.01260 (C2H3O2-)                                                                                                                                                                                                                                                                                                                    | 519.38956,<br>541.37170 |                                                                                                                                     |
|      | 8.61  | 550.27118 | 78.95782 (PO3-), 275.20157 (C18H27O2-), 500.27737 (C25H43NPO7-)                                                                                                                                                                                                                                                                       | 516.30872               | 60.08154 (C3H10N+), 86.09695 (C5H12N+), 104.10734 (C5H14NO+), 124.99994 (C2H6PO4+), 184.07330 (C5H15NPO4+), 498.29874 (C26H45NPO6+) |
|      | 8.93  | 401.10605 |                                                                                                                                                                                                                                                                                                                                       |                         |                                                                                                                                     |
|      | 8.94  | 323.22318 | 59.01258 (C2H3O2-)                                                                                                                                                                                                                                                                                                                    | 325.23768,<br>347.21927 |                                                                                                                                     |
|      | 9.75  | 521.32538 | 73.02821 (C3H5O2-), 485.34872 (C27H49O7-)                                                                                                                                                                                                                                                                                             | 509.34510               |                                                                                                                                     |
| GPE  | 10.37 | 770.24951 | 78.95789 (PO3-), 152.99547 (C3H6PO5-)                                                                                                                                                                                                                                                                                                 | 772.26401               |                                                                                                                                     |
|      | 11.26 | 454.35471 | 86.02370 (C3H4NO2-), 293.28476 (C20H37O-), 349.31137 (C23H41O2-), 367.32156 (C23H43O3-)                                                                                                                                                                                                                                               | 438.35837,<br>478.35092 | MS/MS of 438.35837:<br>100.07610 (C5H10NO+),<br>420.34717 (C26H46NO3+);<br>MS/MS of 478.35092:<br>337.27390 (C21H37O3+)             |
| GPE  | 11.42 | 594.37872 | 78.95782 (PO3-), 96.96856 (H2PO4-), 140.01126 (C2H7NPO4-), 152.99547 (C3H6PO5-), 171.00621 (C3H8PO6-), 214.04869 (C5H13NPO6-)                                                                                                                                                                                                         |                         |                                                                                                                                     |
|      | 11.68 | 515.39594 | 1st peak: 73.02826 (C3H5O2-), 367.32181 (C23H43O3-), 385.33298 (C23H45O4-); 2nd peak: 59.01257 (C2H3O2-), 73.02826 (C3H5O2-)                                                                                                                                                                                                          | 539.39234               |                                                                                                                                     |
| ascr | 12.35 | 634.44684 | 71.01260 (C3H3O2-), 73.02824 (C3H5O2-), 83.04907 (C5H7O-), 86.02361 (C3H4NO2-), 111.04430 (C6H7O2-), 381.37433 (C25H49O2-), 511.43698 (C31H59O5-), 598.46948 (C34H64NO7-)                                                                                                                                                             | 600.48389               | 62.06078 (C2H8NO+),<br>100.07603 (C5H10NO+),<br>434.39923 (C28H52NO2+),<br>452.40985 (C28H54NO3+)                                   |
| ascr | 12.69 | 543.42737 | 59.01258 (C2H3O2-), 73.02827 (C3H5O2-), 83.04922 (C5H7O-), 111.04433 (C6H7O2-)                                                                                                                                                                                                                                                        | 567.42358               |                                                                                                                                     |
| ascr | 13.18 | 533.36206 | 73.02825 (C3H5O2-), 83.04896 (C5H7O-), 111.04438 (C6H7O2-), 497.38492 (C29H53O6-)                                                                                                                                                                                                                                                     |                         |                                                                                                                                     |
|      | 13.28 | 668.40765 |                                                                                                                                                                                                                                                                                                                                       | 656.42676               |                                                                                                                                     |
| ascr | 15.96 | 581.44305 | 59.01266 (C2H3O2-), 73.02834 (C3H5O2-), 83.04920 (C5H7O-), 111.04437 (C6H7O2-), 409.36954 (C26H49O3-), 521.42023 (C32H57O5-), 539.43195 (C32H59O6-)                                                                                                                                                                                   | 605.43945               |                                                                                                                                     |

**Table S7. Differential metabolites from *C. elegans* growth medium, ES- mode, that are decreased or absent in N2 medium compared to *daf-22*. Peaks that are also differential in L1 medium are shown in red. Peaks that are also in L1 medium table (ES-) are shown in bold red.** Entries that have a corresponding peak in the ES+ table are shaded grey.

| class | rt (min) | m/z (ES-)        | MS/MS (ES-)                                                                                                                                                                                                                                                                                                                       | m/z (ES+) | MS/MS (ES+)                                                                                                                                |
|-------|----------|------------------|-----------------------------------------------------------------------------------------------------------------------------------------------------------------------------------------------------------------------------------------------------------------------------------------------------------------------------------|-----------|--------------------------------------------------------------------------------------------------------------------------------------------|
|       | 2.92     | 268.17816        | 111.01894 (C4H3N2O2-), 168.09033 (C6H10N5O-), 169.08533, 186.13303 (C7H16N5O-), 226.15607 (C11H20N3O2-), 251.15167 (C12H19N4O2-)                                                                                                                                                                                                  |           |                                                                                                                                            |
| GPE   | 4.84     | 370.16397        | 78.95776 (PO3-), 96.96848 (H2PO4-), 152.99533 (C3H6PO5-), 171.00607 (C3H8PO6-), 214.04854 (C5H13NPO6-)                                                                                                                                                                                                                            | 372.17847 |                                                                                                                                            |
|       | 4.93     | 296.12729        | 78.95776 (PO3-), 96.96847 (H2PO4-)                                                                                                                                                                                                                                                                                                | 298.14179 |                                                                                                                                            |
| GPE   | 5.00     | <b>382.16422</b> | see L1s, ES- table                                                                                                                                                                                                                                                                                                                |           |                                                                                                                                            |
|       | 5.03     | 294.11142        | 78.95778 (PO3-), 96.96848 (H2PO4-), 140.01118 (C2H7NPO4-)                                                                                                                                                                                                                                                                         | 296.12592 |                                                                                                                                            |
|       | 5.49     | 470.18018        | 78.95786 (PO3-), 96.96861 (H2PO4-), 140.01123 (C2H7NPO4-), 182.02219 (C4H9NPO5-), 259.02258 (C6H12PO9-), 302.06454 (C8H17NPO9-)                                                                                                                                                                                                   | 494.17658 |                                                                                                                                            |
| GPE   | 5.78     | 560.24799        | 59.01263 (C2H3O2-), 71.01256 (C3H3O2-), 78.95784 (PO3-), 89.02323 (C3H5O3-), 96.96851 (H2PO4-), 101.02345 (C4H5O3-), 113.02349 (C5H5O3-), 119.03407 (C4H7O4-), 140.01112 (C2H7NPO4-), 152.99536 (C3H6PO5-), 171.00615 (C3H8PO6-), 333.05908 (C9H18PO11-), 376.10165 (C11H23NPO11-)                                                | 562.26249 |                                                                                                                                            |
|       | 5.84     | 308.12741        | 78.95779 (PO3-), 96.96844 (H2PO4-), *140.01117 (C2H7NPO4-); (* only in 2nd peak)                                                                                                                                                                                                                                                  | 310.14191 |                                                                                                                                            |
|       | 5.94     | 214.14528        | 57.03327 (C3H5O-), 86.02356 (C3H4NO2-), 127.11205 (C8H15O-)                                                                                                                                                                                                                                                                       | 216.15970 | 62.06083 (C2H8NO+), 86.06059 (C4H8NO+), 95.08598 (C7H11+), 198.14888 (C11H20NO2+)                                                          |
| GPE   | 5.97     | 618.29047        | 59.01257 (C2H3O2-), 71.01257 (C3H3O2-), 78.95780 (PO3-), 89.02326 (C3H5O3-), 96.96847 (H2PO4-), 101.02330 (C4H5O3-), 113.02340 (C5H5O3-), 152.99530 (C3H6PO5-), 333.05865 (C9H18PO11-)                                                                                                                                            | 620.30497 |                                                                                                                                            |
|       | 6.03     | 346.22397        | 100.03944 (C4H6NO2-), 102.05499 (C4H8NO2-)                                                                                                                                                                                                                                                                                        | 302.23297 |                                                                                                                                            |
| GPE   | 6.16     | 616.27448        | 59.01264 (C2H3O2-), 71.01261 (C3H3O2-), 78.95786 (PO3-), 89.02328 (C3H5O3-), 101.02336 (C4H5O3-), 113.02328 (C5H5O3-), 119.03419 (C4H7O4-), 140.01122 (C2H7NPO4-), 152.99529 (C3H6PO5-), 196.03816 (C5H11NPO5-), 214.04877 (C5H13NPO6-), 376.10126 (C11H23NPO11-)                                                                 | 640.27088 |                                                                                                                                            |
|       | 6.17     | 303.21796        | 59.01253 (C2H3O2-), 243.19670 (C14H27O3-)                                                                                                                                                                                                                                                                                         | 305.23246 |                                                                                                                                            |
| GPE   | 6.28     | 548.26367        | 78.95772 (PO3-), 140.01096 (C2H7NPO4-), 152.99518 (C3H6PO5-), 214.04852 (C5H13NPO6-)                                                                                                                                                                                                                                              | 550.27817 |                                                                                                                                            |
|       | 6.36     | 231.16019        | 59.01253 (C2H3O2-), 171.13873 (C10H19O2-)                                                                                                                                                                                                                                                                                         |           |                                                                                                                                            |
|       | 6.40     | 433.19995        | 78.95779 (PO3-), 96.96851 (H2PO4-)                                                                                                                                                                                                                                                                                                | 435.21460 | 301.21588 (C20H29O2+), 319.22668 (C20H31O3+)                                                                                               |
| GPE   | 6.47     | 670.32196        | 59.01255 (C2H3O2-), 71.01257 (C3H3O2-), 78.95781 (PO3-), 89.02323 (C3H5O3-), 96.96853 (H2PO4-), 101.02341 (C4H5O3-), 113.02347 (C5H5O3-), 119.03407 (C4H7O4-), 140.01128 (C2H7NPO4-), 152.99541 (C3H6PO5-), 171.00607 (C3H8PO6-), *196.03784 (C5H11NPO5-), 333.05951 (C9H18PO11-), 376.10147 (C11H23NPO11-); (* only in 2nd peak) | 672.33612 | 86.06060 (C4H8NO+), *112.03963 (C5H6NO2+), 302.24774 (C20H32NO+), 320.25836 (C20H34NO2+), 338.26883 (C20H36NO3+); (* only in 7.2 min peak) |
|       | 6.50     | 315.21786        | 59.01255 (C2H3O2-), 255.19638 (C15H27O3-)                                                                                                                                                                                                                                                                                         | 317.23236 |                                                                                                                                            |
| GPE   | 6.50     | 658.32166        | 59.01254 (C2H3O2-), 71.01254 (C3H3O2-), 78.95776 (PO3-), 89.02318 (C3H5O3-), 101.02325 (C4H5O3-), 113.02338 (C5H5O3-), 119.03397 (C4H7O4-), 140.01102 (C2H7NPO4-), 152.99515 (C3H6PO5-), 196.03784 (C5H11NPO5-), 214.04881 (C5H13NPO6-), 333.05975 (C9H18PO11-), 376.10114 (C11H23NPO11-)                                         | 660.33594 | 86.06059 (C4H8NO+), 308.25827 (C19H34NO2+), 326.26880 (C19H36NO3+)                                                                         |
|       | 6.51     | 243.16025        | 59.01256 (C2H3O2-)                                                                                                                                                                                                                                                                                                                |           |                                                                                                                                            |
| EA    | 6.53     | 362.25516        | 100.03936 (C4H6NO2-), 102.05502 (C4H8NO2-)                                                                                                                                                                                                                                                                                        | 318.26416 | 62.06081 (C2H8NO+), 282.24252 (C17H32NO2+), 300.25311 (C17H34NO3+)                                                                         |
|       | 6.54     | 317.19717        | 59.01258 (C2H3O2-), 129.05504 (C6H9O3-),                                                                                                                                                                                                                                                                                          | 341.19357 |                                                                                                                                            |

|     |      |           |                                                                                                                                                                                                                                                                                    |           |                                                                                                                                                                                                                                                                                 |
|-----|------|-----------|------------------------------------------------------------------------------------------------------------------------------------------------------------------------------------------------------------------------------------------------------------------------------------|-----------|---------------------------------------------------------------------------------------------------------------------------------------------------------------------------------------------------------------------------------------------------------------------------------|
|     |      |           | 195.17531 (C13H23O-), 255.19687 (C15H27O3-), 257.17551 (C14H25O4-), 299.18658 (C16H27O5-)                                                                                                                                                                                          |           |                                                                                                                                                                                                                                                                                 |
| EA  | 6.57 | 348.23935 | 100.03934 (C4H6NO2-), 102.05499 (C4H8NO2-), 199.17055 (C12H23O2-)                                                                                                                                                                                                                  | 304.24826 | 62.06081 (C2H8NO+), 268.22687 (C16H30NO2+), 286.23743 (C16H32NO3+)                                                                                                                                                                                                              |
|     | 6.63 | 515.28632 | 59.01253 (C2H3O2-), 71.01254 (C3H3O2-), 89.02335 (C3H5O3-), 101.02341 (C4H5O3-), 113.02348 (C5H5O3-)                                                                                                                                                                               |           |                                                                                                                                                                                                                                                                                 |
| GPE | 6.65 | 646.32141 | 59.01253 (C2H3O2-), 71.01257 (C3H3O2-), 78.95777 (PO3-), 89.02323 (C3H5O3-), 96.96848 (H2PO4-), 101.02336 (C4H5O3-), 113.02354 (C5H5O3-), 119.03410 (C4H7O4-), 140.01131 (C2H7NPO4-), 152.99536 (C3H6PO5-), 171.00624 (C3H8PO6-), 333.05911 (C9H18PO11-), 376.10126 (C11H23NPO11-) | 648.33557 | 86.06059 (C4H8NO+), 278.24780 (C18H32NO+), 296.25845 (C18H34NO2+), 314.26892 (C18H36NO3+)                                                                                                                                                                                       |
| EA  | 6.70 | 526.27924 | 71.01247 (C3H3O2-), 101.02342 (C4H5O3-), 403.26962 (C21H39O7-)                                                                                                                                                                                                                     | 492.31706 | 62.06083 (C2H8NO+), 86.06059 (C4H8NO+), 294.24261 (C18H32NO2+), 312.25314 (C18H34NO3+)                                                                                                                                                                                          |
| EA  | 6.78 | 370.26010 |                                                                                                                                                                                                                                                                                    | 372.27460 | 6.3 and 6.75 min: 62.06082 (C2H8NO+), **251.20030 (C16H27O2+), *257.18979 (C18H25O+), 275.20044 (C18H27O2+), 293.21097 (C18H29O3+), **311.22168 (C18H31O4+), *318.24268 (C20H32NO2+), 336.25339 (C20H34NO3+), 354.26376 (C20H36NO4+); (* only in 1st peak, ** only in 2nd peak) |
|     | 6.78 | 314.23407 | 57.03325 (C3H5O-), 86.02354 (C3H4NO2-), 211.17027 (C13H23O2-), 227.20154 (C14H27O2-)                                                                                                                                                                                               | 316.24857 | 62.06082 (C2H8NO+), 86.06059 (C4H8NO+), 280.22693 (C17H30NO2+), 298.23746 (C17H32NO3+)                                                                                                                                                                                          |
|     | 6.82 | 228.16058 | 57.03328 (C3H5O-), 86.02355 (C3H4NO2-), 141.12796 (C9H17O-)                                                                                                                                                                                                                        | 230.17508 |                                                                                                                                                                                                                                                                                 |
| GPE | 6.85 | 672.33771 | 59.01252 (C2H3O2-), 71.01255 (C3H3O2-), 78.95777 (PO3-), 89.02321 (C3H5O3-), 96.96848 (H2PO4-), 101.02332 (C4H5O3-), 113.02347 (C5H5O3-), 119.03410 (C4H7O4-), 152.99535 (C3H6PO5-), 171.00618 (C3H8PO6-), 333.05930 (C9H18PO11-), 376.10138 (C11H23NPO11-)                        | 674.35205 | 86.06059 (C4H8NO+), 304.26318 (C20H34NO+), 322.27374 (C20H36NO2+), 340.28430 (C20H38NO3+)                                                                                                                                                                                       |
|     | 6.86 | 473.27591 | 59.01255 (C2H3O2-), 71.01258 (C3H3O2-), 89.02328 (C3H5O3-), 101.02336 (C4H5O3-), 113.02352 (C5H5O3-), 119.03411 (C4H7O4-), 455.26495 (C24H39O8-)                                                                                                                                   | 492.31696 | 217.19505 (C16H25+), 235.20549 (C16H27O+), 241.19482 (C18H25+), 259.20529 (C18H27O+), 277.21613 (C18H29O2+), 295.22665 (C18H31O3+)                                                                                                                                              |
| EA  | 6.90 | 442.28156 |                                                                                                                                                                                                                                                                                    | 398.29037 | 62.06081 (C2H8NO+), 84.08134 (C5H10N+), 344.25851 (C22H34NO2+), 362.26846 (C22H36NO3+), 380.27863 (C22H38NO4+)                                                                                                                                                                  |
|     | 6.93 | 245.17601 | 59.01255 (C2H3O2-), 185.15448 (C11H21O2-)                                                                                                                                                                                                                                          |           |                                                                                                                                                                                                                                                                                 |
|     | 6.94 | 461.27594 |                                                                                                                                                                                                                                                                                    |           |                                                                                                                                                                                                                                                                                 |
| GPE | 6.96 | 666.29034 | 59.01223 (C2H3O2-), 71.01229 (C3H3O2-), 78.95791 (PO3-), 89.02337 (C3H5O3-), 101.02343 (C4H5O3-), 113.02356 (C5H5O3-), 119.03415 (C4H7O4-), 140.01120 (C2H7NPO4-), 152.99541 (C3H6PO5-), 196.03781 (C5H11NPO5-), 333.05957 (C9H18PO11-), 376.10117 (C11H23NPO11-)                  | 690.28674 |                                                                                                                                                                                                                                                                                 |
|     | 7.03 | 619.33392 | 59.01261 (C2H3O2-), 71.01260 (C3H3O2-), 89.02325 (C3H5O3-), 101.02331 (C4H5O3-), 113.02349 (C5H5O3-), 119.03407 (C4H7O4-), 131.03424 (C5H7O4-), 161.04501 (C6H9O5-), 221.06644 (C8H13O7-), 277.21686 (C18H29O2-)                                                                   | 638.37524 | 85.02894 (C4H5O2+), 97.02877 (C5H5O2+), 127.03906 (C6H7O3+), 145.04956 (C6H9O4+), 261.22104 (C18H29O+), 279.23160 (C18H31O2+)                                                                                                                                                   |
|     | 7.10 | 391.18982 | 78.95779 (PO3-), 96.96850 (H2PO4-)                                                                                                                                                                                                                                                 | 393.20432 |                                                                                                                                                                                                                                                                                 |
| EA  | 7.11 | 394.26016 | 57.03328 (C3H5O-), 86.02367 (C3H4NO2-), 87.04408 (C4H7O2-), 219.17548 (C15H23O-), 254.17548 (C17H20NO-), 307.22791 (C19H31O3-)                                                                                                                                                     | 396.27466 | 62.06082 (C2H8NO+), 275.20020 (C18H27O2+), 299.19980 (C20H27O2+), 317.21088 (C20H29O3+), 342.24222 (C22H32O2N+), 360.25278                                                                                                                                                      |

|     |      |           |                                                                                                                                                                                                                                                                                                                                                                     |                                                  |                                                                                                                                                  |
|-----|------|-----------|---------------------------------------------------------------------------------------------------------------------------------------------------------------------------------------------------------------------------------------------------------------------------------------------------------------------------------------------------------------------|--------------------------------------------------|--------------------------------------------------------------------------------------------------------------------------------------------------|
|     |      |           |                                                                                                                                                                                                                                                                                                                                                                     |                                                  | (C22H34O3N+), 378.26349<br>(C22H36O4N+)                                                                                                          |
|     | 7.16 | 419.26566 | 59.01254 (C2H3O2-), 71.01256 (C3H3O2-),<br>101.02329 (C4H5O3-), 257.21219 (C15H29O3-)                                                                                                                                                                                                                                                                               |                                                  |                                                                                                                                                  |
| GPE | 7.19 | 510.28391 | 78.95777 (PO3-), 96.96841 (H2PO4-), 140.01109<br>(C2H7NPO4-), 152.99530 (C3H6PO5-), 171.00603<br>(C3H8PO6-), 214.04860 (C5H13NPO6-)                                                                                                                                                                                                                                 |                                                  |                                                                                                                                                  |
|     | 7.19 | 387.19470 | 78.95778 (PO3-), 96.96848 (H2PO4-)                                                                                                                                                                                                                                                                                                                                  | 389.20892                                        |                                                                                                                                                  |
| GPE | 7.22 | 754.42700 | 59.01253 (C2H3O2-), 71.01257 (C3H3O2-), 78.95778<br>(PO3-), 89.02324 (C3H5O3-), 101.02337 (C4H5O3-),<br>113.02341 (C5H5O3-), 119.03418 (C4H7O4-),<br>140.01117 (C2H7NPO4-), 152.99533 (C3H6PO5-),<br>196.03793 (C5H11NPO5-), 214.04855 (C5H13NPO6-<br>), 333.05994 (C9H18PO11-), 376.10132<br>(C11H23NPO11-), 640.31067 (C28H51O13NP-),<br>652.31146 (C29H51O13NP-) | 756.44116                                        | 84.08132 (C5H10N+), 86.06059<br>(C4H8NO+), 98.09686 (C6H12N+),<br>115.12326 (C6H15N2+), 308.25830<br>(C19H34NO2+)                                |
|     | 7.23 | 475.29160 | 1st peak: 59.01258 (C2H3O2-), 71.01263 (C3H3O2-),<br>89.02335 (C3H5O3-), 101.02338 (C4H5O3-),<br>113.02358 (C5H5O3-), 119.03407 (C4H7O4-)                                                                                                                                                                                                                           | 1st peak:<br>494.3321,<br>2nd peak:<br>448.32715 |                                                                                                                                                  |
|     | 7.25 | 269.17609 | 59.01257 (C2H3O2-), 181.15936 (C12H21O-)                                                                                                                                                                                                                                                                                                                            |                                                  |                                                                                                                                                  |
|     | 7.26 | 405.24966 | 59.01254 (C2H3O2-), 71.01256 (C3H3O2-), 85.02828<br>(C4H5O2-), 89.02320 (C3H5O3-), 101.02332<br>(C4H5O3-), 113.02348 (C5H5O3-), 119.03400<br>(C4H7O4-), 225.18605 (C14H25O2-), 243.19635<br>(C14H27O3-)                                                                                                                                                             |                                                  |                                                                                                                                                  |
|     | 7.28 | 259.19156 | 59.01254 (C2H3O2-), 199.17014 (C12H23O2-)                                                                                                                                                                                                                                                                                                                           |                                                  |                                                                                                                                                  |
|     | 7.31 | 273.20740 | 59.01263 (C2H3O2-)                                                                                                                                                                                                                                                                                                                                                  |                                                  |                                                                                                                                                  |
|     | 7.31 | 309.17117 | 59.01253 (C2H3O2-), 247.17043 (C16H23O2-),<br>249.14906 (C15H21O3-)                                                                                                                                                                                                                                                                                                 |                                                  |                                                                                                                                                  |
|     | 7.32 | 592.27716 | 193.15950 (C13H21O-), 237.14934 (C14H21O3-)                                                                                                                                                                                                                                                                                                                         | 548.28595                                        | 120.08095 (C8H10N+), 166.08618<br>(C9H12NO2+), 239.16400<br>(C14H23O3+), 292.11768<br>(C15H18NO5+), 310.12823<br>(C15H20NO6+), glucose fragments |
|     | 7.35 | 515.28656 | 59.01250 (C2H3O2-), 71.01253 (C3H3O2-), 85.02828<br>(C4H5O2-), 89.02324 (C3H5O3-), 101.02332<br>(C4H5O3-), 113.02367 (C5H5O3-), 119.03407<br>(C4H7O4-), 161.04514 (C6H9O5-)                                                                                                                                                                                         | 488.32214,<br>493.27744                          |                                                                                                                                                  |
|     | 7.36 | 242.17653 | 57.03332 (C3H5O-), 86.02360 (C3H4NO2-),<br>155.14365 (C10H19O-)                                                                                                                                                                                                                                                                                                     | 244.19103                                        |                                                                                                                                                  |
|     | 7.40 | 343.24927 | 59.01250 (C2H3O2-)                                                                                                                                                                                                                                                                                                                                                  | 345.26377,<br>367.24548                          |                                                                                                                                                  |
|     | 7.41 | 419.26553 | 59.01254 (C2H3O2-), 71.01256 (C3H3O2-),<br>101.02329 (C4H5O3-), 257.21219 (C15H29O3-)                                                                                                                                                                                                                                                                               |                                                  |                                                                                                                                                  |
| GPE | 7.42 | 668.30634 | 59.01256 (C2H3O2-), 71.01257 (C3H3O2-), 78.95779<br>(PO3-), 89.02322 (C3H5O3-), 101.02330 (C4H5O3-),<br>113.02344 (C5H5O3-), 119.03404 (C4H7O4-),<br>140.01111 (C2H7NPO4-), 152.99530 (C3H6PO5-),<br>196.03784 (C5H11NPO5-), 214.04851 (C5H13NPO6-<br>), 333.05917 (C9H18PO11-), 376.10123<br>(C11H23NPO11-)                                                        |                                                  |                                                                                                                                                  |
|     | 7.46 | 417.20520 | 78.95776 (PO3-), 96.96841 (H2PO4-)                                                                                                                                                                                                                                                                                                                                  | 419.21970                                        |                                                                                                                                                  |
|     | 7.47 | 297.20740 | 1st peak: 155.10735 (C9H15O2-); 2nd peak:<br>59.01251 (C2H3O2-)                                                                                                                                                                                                                                                                                                     | 299.2219,<br>321.20358                           |                                                                                                                                                  |
| GPE | 7.50 | 694.32153 | 59.01252 (C2H3O2-), 71.01254 (C3H3O2-), 78.95777<br>(PO3-), 89.02322 (C3H5O3-), 101.02332 (C4H5O3-),<br>113.02348 (C5H5O3-), 119.03411 (C4H7O4-),<br>140.01117 (C2H7NPO4-), 152.99538 (C3H6PO5-),<br>196.03781 (C5H11NPO5-), 214.04851 (C5H13NPO6-<br>), 333.05875 (C9H18PO11-), 376.10120<br>(C11H23NPO11-)                                                        | 696.33603                                        |                                                                                                                                                  |
| GPE | 7.54 | 600.27966 | 59.01254 (C2H3O2-), 71.01257 (C3H3O2-), 78.95781<br>(PO3-), 89.02324 (C3H5O3-), 101.02336 (C4H5O3-),<br>113.02357 (C5H5O3-), 119.03413 (C4H7O4-),<br>140.01123 (C2H7NPO4-), 152.99544 (C3H6PO5-),<br>196.03790 (C5H11NPO5-), 214.04868 (C5H13NPO6-<br>), 333.05988 (C9H18PO11-), 376.10153<br>(C11H23NPO11-)                                                        | 602.29416                                        |                                                                                                                                                  |
|     | 7.54 | 400.27063 | 100.03931 (C4H6NO2-), 102.05501 (C4H8NO2-),<br>251.20146 (C16H27O2-)                                                                                                                                                                                                                                                                                                | 356.27963                                        |                                                                                                                                                  |



|     |      |           |                                                                                                                                                                                                                                                                                                                                                                                                          |                                          |                                                                                                                                              |
|-----|------|-----------|----------------------------------------------------------------------------------------------------------------------------------------------------------------------------------------------------------------------------------------------------------------------------------------------------------------------------------------------------------------------------------------------------------|------------------------------------------|----------------------------------------------------------------------------------------------------------------------------------------------|
|     | 7.56 | 353.23358 | 59.01253 (C2H3O2-), 87.04396 (C4H7O2-), 335.22235 (C20H31O4-)                                                                                                                                                                                                                                                                                                                                            | 355.24808                                |                                                                                                                                              |
|     | 7.57 | 393.20572 | 78.95787 (PO3-), 96.96854 (H2PO4-)                                                                                                                                                                                                                                                                                                                                                                       | 395.22022                                |                                                                                                                                              |
| GPE | 7.60 | 674.35291 | 59.01252 (C2H3O2-), 71.01257 (C3H3O2-), 78.95777 (PO3-), 89.02325 (C3H5O3-), 96.96851 (H2PO4-), 101.02333 (C4H5O3-), 119.03416 (C4H7O4-), 140.01115 (C2H7NPO4-), 152.99536 (C3H6PO5-), 333.05978 (C9H18PO11-), 376.10102 (C11H23NPO11-)                                                                                                                                                                  | 676.36749                                | 86.06059 (C4H8NO+), 306.27896 (C20H36NO+), 324.28955 (C20H38NO2+), 342.30011 (C20H40NO3+)                                                    |
| GPE | 7.65 | 692.30615 | 59.01256 (C2H3O2-), 71.01264 (C3H3O2-), 78.95791 (PO3-), 89.02338 (C3H5O3-), 101.02345 (C4H5O3-), 113.02357 (C5H5O3-), 119.03415 (C4H7O4-), 140.01125 (C2H7NPO4-), 152.99554 (C3H6PO5-), 196.03778 (C5H11NPO5-), 214.04852 (C5H13NPO6-), 333.05911 (C9H18PO11-), 376.10123 (C11H23NPO11-)                                                                                                                | 694.32031                                | 86.06058 (C4H8NO+), 112.03960 (C5H6NO2+), 128.07072 (C6H10NO2+), 342.24258 (C22H32NO2+), 360.25305 (C22H34NO3+)                              |
|     | 7.67 | 323.18674 | 59.01253 (C2H3O2-), 261.18588 (C17H25O2-), 263.16544 (C16H23O3-), 305.17603 (C18H25O4-)                                                                                                                                                                                                                                                                                                                  |                                          |                                                                                                                                              |
|     | 7.67 | 491.19284 | 93.03342 (C6H5O-), 137.02379 (C7H5O3-), 141.12782 (C9H17O-), 165.12813 (C11H17O-), 167.10759 (C10H15O2-), 209.11823 (C12H17O3-), 281.06638 (C13H13O7-)                                                                                                                                                                                                                                                   | 493.20734                                |                                                                                                                                              |
|     | 7.70 | 271.19177 | 59.01253 (C2H3O2-), 209.19109 (C14H25O-)                                                                                                                                                                                                                                                                                                                                                                 | 273.20627                                |                                                                                                                                              |
|     | 7.73 | 283.19180 | 59.01254 (C2H3O2-)                                                                                                                                                                                                                                                                                                                                                                                       | 285.20630                                |                                                                                                                                              |
|     | 7.77 | 299.22296 | 1st peak: 209.15468 (C13H21O2-), 239.20151 (C15H27O2-), 253.14435 (C14H21O4-); 2nd peak: 59.01254 (C2H3O2-), 237.22261 (C16H29O-)                                                                                                                                                                                                                                                                        | 301.23746                                |                                                                                                                                              |
|     | 7.77 | 342.26526 | 57.03328 (C3H5O-), 86.02369 (C3H4NO2-), 239.20164 (C15H27O2-), 255.23297 (C16H31O2-)                                                                                                                                                                                                                                                                                                                     | 344.27976, 366.26144                     |                                                                                                                                              |
|     | 7.78 | 803.36066 | 59.01260 (C2H3O2-), 71.01263 (C3H3O2-), 78.95778 (PO3-), 89.02333 (C3H5O3-), 94.03996 (C4H4N3-), 96.96845 (H2PO4-), 101.02337 (C4H5O3-), 108.01938 (C4H2N3O-), 126.02992 (C4H4N3O2-), 133.01477 (C5HN4O), 150.04163 (C5H4N5O-), 152.99530 (C3H6PO5-), 171.00597 (C3H8PO6-), 333.05911 (C9H18PO11-), 358.25034 (C21H32N5O3-), 376.10226 (C11H23NPO11-), 426.25146 (C23H32N5O3-), 652.31055 (C29H51NPO13-) | 805.37469                                | 126.05506 (C6H8NO2+), 152.05669 (C5H6N5O+), 206.06717 (C8H8N5O2+), 320.25824 (C20H34NO2+), 471.30801 (C25H39N6O3+), 643.32178 (C28H48N6PO9+) |
|     | 7.79 | 461.27634 | 1st peak: 59.01257 (C2H3O2-), 71.01259 (C3H3O2-), 89.02322 (C3H5O3-), 101.02332 (C4H5O3-), 113.02344 (C5H5O3-)                                                                                                                                                                                                                                                                                           | 434.31122, 439.26660 (only for 2nd peak) |                                                                                                                                              |
| GPE | 7.80 | 669.33759 | 59.01253 (C2H3O2-), 71.01255 (C3H3O2-), 78.95778 (PO3-), 89.02323 (C3H5O3-), 101.02335 (C4H5O3-), 113.02350 (C5H5O3-), 119.03408 (C4H7O4-), 140.01118 (C2H7NPO4-), 152.99538 (C3H6PO5-), 171.00626 (C3H8PO6-), 196.03799 (C5H11NPO5-), 214.04878 (C5H13NPO6-), 333.05917 (C9H18PO11-), 376.10123 (C11H23NPO11-)                                                                                          | 671.35181                                | 86.06055 (C4H8NO+), 112.03957 (C5H6NO2+), 308.25815 (C19H34NO2+), 480.27286 (C22H43NPO8+)                                                    |
|     | 7.83 | 357.26489 | 59.01253 (C2H3O2-)                                                                                                                                                                                                                                                                                                                                                                                       | 359.27939, 381.26102                     |                                                                                                                                              |
| GPE | 7.83 | 787.36560 | 59.01265 (C2H3O2-), 71.01262 (C3H3O2-), 78.95787 (PO3-), 89.02326 (C3H5O3-), 96.96863 (H2PO4-), 101.02344 (C4H5O3-), 134.04654 (C5H4N5-), 152.99542 (C3H6PO5-), 333.05917 (C9H18PO11-), 652.31042 (C29H51NPO13-)                                                                                                                                                                                         | 789.38010                                |                                                                                                                                              |
|     | 7.84 | 457.28104 | 59.01253 (C2H3O2-), 71.01254 (C3H3O2-), 85.02827 (C4H5O2-), 89.02322 (C3H5O3-), 101.02334 (C4H5O3-), 113.02350 (C5H5O3-), 119.03418 (C4H7O4-), 277.21704 (C18H29O2-), 295.22778 (C18H31O3-)                                                                                                                                                                                                              | 459.29554, 476.32220                     |                                                                                                                                              |
|     | 7.87 | 313.20230 | 59.01255 (C2H3O2-), 251.20143 (C16H27O2-), 253.18069 (C15H25O3-), 295.19089 (C17H27O4-)                                                                                                                                                                                                                                                                                                                  |                                          |                                                                                                                                              |
|     | 7.90 | 352.24954 | 7.9 min: 57.03331 (C3H5O-), 86.02359 (C3H4NO2-), 111.08054 (C7H11O-), 153.12810 (C10H17O-); 8.2 min: 57.03329 (C3H5O-), 86.02367 (C3H4NO2-), 113.09635 (C7H13O-), 247.20657 (C17H27O-); 9.1 min: 86.02364 (C3H4NO2-), 115.07561 (C6H11O2-), 265.21722 (C17H29O2-)                                                                                                                                        | 354.26404                                |                                                                                                                                              |
| GPE | 7.91 | 723.38495 | 59.01251 (C2H3O2-), 71.01254 (C3H3O2-), 78.95776 (PO3-), 89.02320 (C3H5O3-), 101.02331 (C4H5O3-),                                                                                                                                                                                                                                                                                                        |                                          |                                                                                                                                              |

|     |      |           |                                                                                                                                                                                                                                                                                                                  |           |                                                                                                                                                                                                                                                                                |
|-----|------|-----------|------------------------------------------------------------------------------------------------------------------------------------------------------------------------------------------------------------------------------------------------------------------------------------------------------------------|-----------|--------------------------------------------------------------------------------------------------------------------------------------------------------------------------------------------------------------------------------------------------------------------------------|
|     |      |           | 113.02348 (C5H5O3-), 119.03407 (C4H7O4-), 140.01112 (C2H7NPO4-), 152.99532 (C3H6PO5-), 196.03786 (C5H11NPO5-), 214.04851 (C5H13NPO6-), 333.05920 (C9H18PO11-), 376.10110 (C11H23NPO11-), 640.31067 (C28H51NPO13-)                                                                                                |           |                                                                                                                                                                                                                                                                                |
| GPE | 7.92 | 614.29523 | 59.01253 (C2H3O2-), 71.01253 (C3H3O2-), 78.95774 (PO3-), 89.02316 (C3H5O3-), 101.02322 (C4H5O3-), 113.02333 (C5H5O3-), 119.03391 (C4H7O4-), 140.01100 (C2H7NPO4-), 152.99525 (C3H6PO5-), 196.03790 (C5H11NPO5-), 214.04857 (C5H13NPO6-), 333.05917 (C9H18PO11-), 376.10123 (C11H23NPO11-)                        | 616.30975 | 86.06059 (C4H8NO+), 282.24255 (C17H32NO2+)                                                                                                                                                                                                                                     |
|     | 7.97 | 352.22650 |                                                                                                                                                                                                                                                                                                                  |           |                                                                                                                                                                                                                                                                                |
| GPE | 7.98 | 438.22638 | 78.95782 (PO3-), 140.01129 (C2H7NPO4-), 152.99542 (C3H6PO5-), 214.04861 (C5H13NPO6-)                                                                                                                                                                                                                             | 440.24088 |                                                                                                                                                                                                                                                                                |
| EA  | 7.98 | 426.28662 | 100.03931 (C4H6NO2-), 102.05490 (C4H8NO2-)                                                                                                                                                                                                                                                                       | 382.29562 | 62.06081 (C2H8NO+), 346.27396 (C22H36NO2+), 364.28397 (C22H38NO3+)                                                                                                                                                                                                             |
|     | 8.03 | 402.28641 | 100.03925 (C4H6NO2-), 102.05492 (C4H8NO2-), 139.11212 (C9H15O-), 253.21695 (C16H29O2-)                                                                                                                                                                                                                           | 358.29541 |                                                                                                                                                                                                                                                                                |
|     | 8.07 | 374.25504 | 57.03329 (C3H5O-), 86.02356 (C3H4NO2-), 239.20163 (C15H27O2-), 241.21721 (C15H29O2-)                                                                                                                                                                                                                             | 330.26404 |                                                                                                                                                                                                                                                                                |
|     | 8.10 | 376.27072 | 100.03934 (C4H6NO2-), 102.05497 (C4H8NO2-), 227.20148 (C14H27O2-)                                                                                                                                                                                                                                                | 332.27972 |                                                                                                                                                                                                                                                                                |
|     | 8.10 | 293.17630 | 59.01253 (C2H3O2-)                                                                                                                                                                                                                                                                                               | 295.19080 |                                                                                                                                                                                                                                                                                |
|     | 8.18 | 319.19174 | 59.01253 (C2H3O2-)                                                                                                                                                                                                                                                                                               | 321.20624 |                                                                                                                                                                                                                                                                                |
|     | 8.19 | 499.29193 |                                                                                                                                                                                                                                                                                                                  | 472.32693 |                                                                                                                                                                                                                                                                                |
|     | 8.22 | 770.24408 |                                                                                                                                                                                                                                                                                                                  |           |                                                                                                                                                                                                                                                                                |
|     | 8.23 | 378.26541 | 57.03327 (C3H5O-), 86.02357 (C3H4NO2-), 219.17531 (C15H23O-), 291.23340 (C19H31O2-)                                                                                                                                                                                                                              | 380.27991 |                                                                                                                                                                                                                                                                                |
|     | 8.26 | 285.20740 | 59.01253 (C2H3O2-)                                                                                                                                                                                                                                                                                               | 287.22190 |                                                                                                                                                                                                                                                                                |
|     | 8.28 | 758.24365 |                                                                                                                                                                                                                                                                                                                  |           |                                                                                                                                                                                                                                                                                |
|     | 8.29 | 710.31390 |                                                                                                                                                                                                                                                                                                                  | 644.34110 | 86.06059 (C4H8NO+), 98.06046 (C5H8NO+), 292.26334 (C19H34NO+), 310.27390 (C19H36NO2+)                                                                                                                                                                                          |
|     | 8.30 | 772.28497 |                                                                                                                                                                                                                                                                                                                  |           |                                                                                                                                                                                                                                                                                |
| GPE | 8.31 | 676.31061 | 59.01253 (C2H3O2-), 71.01255 (C3H3O2-), 78.95778 (PO3-), 89.02323 (C3H5O3-), 101.02338 (C4H5O3-), 113.02348 (C5H5O3-), 119.03409 (C4H7O4-), 140.01120 (C2H7NPO4-), 152.99539 (C3H6PO5-), 196.03787 (C5H11NPO5-), 214.04852 (C5H13NPO6-), 333.06006 (C9H18PO11-), 376.10141 (C11H23NPO11-)                        | 678.32511 |                                                                                                                                                                                                                                                                                |
|     | 8.33 | 846.46222 |                                                                                                                                                                                                                                                                                                                  | 848.47672 |                                                                                                                                                                                                                                                                                |
| GPE | 8.34 | 652.31097 | 59.01252 (C2H3O2-), 71.01255 (C3H3O2-), 78.95778 (PO3-), 89.02321 (C3H5O3-), 101.02332 (C4H5O3-), 113.02348 (C5H5O3-), 119.03410 (C4H7O4-), 140.01117 (C2H7NPO4-), 152.99538 (C3H6PO5-), 196.03784 (C5H11NPO5-), 214.04849 (C5H13NPO6-), 333.05930 (C9H18PO11-), 376.10120 (C11H23NPO11-)                        | 654.32550 | diff. peak: 86.06059 (C4H8NO+), 320.25836 (C20H34NO2+); later peak: 100.07613 (C5H10NO+), 126.05511 (C6H8NO2+), 320.25836 (C20H34NO2+)                                                                                                                                         |
| GPE | 8.41 | 640.31073 | 59.01252 (C2H3O2-), 71.01254 (C3H3O2-), 78.95776 (PO3-), 89.02321 (C3H5O3-), 101.02331 (C4H5O3-), 113.02347 (C5H5O3-), 119.03407 (C4H7O4-), 140.01114 (C2H7NPO4-), 152.99535 (C3H6PO5-), 196.03780 (C5H11NPO5-), 214.04851 (C5H13NPO6-), 333.05923 (C9H18PO11-), 376.10117 (C11H23NPO11-)                        | 642.32513 | 86.06061 (C4H8NO+), 308.25833 (C19H34NO2+)                                                                                                                                                                                                                                     |
|     | 8.44 | 844.44678 |                                                                                                                                                                                                                                                                                                                  | 846.46128 |                                                                                                                                                                                                                                                                                |
|     | 8.45 | 321.20718 | 59.01253 (C2H3O2-)                                                                                                                                                                                                                                                                                               | 323.22168 |                                                                                                                                                                                                                                                                                |
|     | 8.46 | 354.26508 | 8.46 min: 57.03326 (C3H5O-), 86.02354 (C3H4NO2-), 113.09646 (C7H13O-), 153.12807 (C10H17O-), 267.23294 (C17H32O2-); 8.65 min: 57.03323 (C3H5O-), 86.02357 (C3H4NO2-), 141.09154 (C8H13O2-), 267.23279 (C17H32O2-); 9.65 min: 57.03330 (C3H5O-), 86.02353 (C3H4NO2-), 169.15958 (C11H21O-), 267.23267 (C17H32O2-) | 356.27948 | 8.4 min: 62.06082 (C2H8NO+), 217.19510 (C16H25+), 259.20563 (C18H27O+), 320.25830 (C20H34NO2+), 338.26880 (C20H36NO3+); 9.7 min: 62.06083 (C2H8NO+), 217.19498 (C16H25+), 235.20555 (C16H27O+), 253.21631 (C16H29O2+), 271.22653 (C16H31O3+), 295.22662 (C18H31O3+), 338.26920 |

|      |       |           |                                                                                                                                                                                                                                                                                                                                    |                         |                                                                                                                                       |
|------|-------|-----------|------------------------------------------------------------------------------------------------------------------------------------------------------------------------------------------------------------------------------------------------------------------------------------------------------------------------------------|-------------------------|---------------------------------------------------------------------------------------------------------------------------------------|
|      |       |           |                                                                                                                                                                                                                                                                                                                                    |                         | (C20H36NO3+)                                                                                                                          |
|      | 8.46  | 431.30139 | 59.01253 (C2H3O2-)                                                                                                                                                                                                                                                                                                                 | 450.34189               |                                                                                                                                       |
|      | 8.47  | 568.28955 | 78.95776 (PO3-), 96.96840 (H2PO4-), 406.23679 (C19H37NPO6-)                                                                                                                                                                                                                                                                        |                         |                                                                                                                                       |
| GPE  | 8.48  | 452.24213 | 78.95779 (PO3-), 140.01117 (C2H7NPO4-), 152.99535 (C3H6PO5-), 171.00612 (C3H8PO6-), 214.04857 (C5H13NPO6-)                                                                                                                                                                                                                         | 454.25663               |                                                                                                                                       |
| GPE  | 8.61  | 807.38458 | 78.95780 (PO3-), 86.02342 (C3H4NO2-), 96.96844 (H2PO4-), 147.04456 (C9H7O2-), 152.99547 (C3H6PO5-), 164.07146 (C9H10NO2-)                                                                                                                                                                                                          | 809.39862               | 120.08100 (C8H10N+), 292.11795 (C15H18NO5+), 310.12888 (C15H20NO6+), 328.26379 (C22H34NO+), 482.14206 (C18H29NPO12+)                  |
|      | 8.68  | 553.31519 | 78.95780 (PO3-), 209.02257 (C6H10PO6-)                                                                                                                                                                                                                                                                                             | 555.32969               |                                                                                                                                       |
| GPE  | 8.71  | 684.33728 | 59.01253 (C2H3O2-), 71.01254 (C3H3O2-), 78.95777 (PO3-), 89.02324 (C3H5O3-), 96.96849 (H2PO4-), 101.02334 (C4H5O3-), 113.02348 (C5H5O3-), 119.03407 (C4H7O4-), 140.01114 (C2H7NPO4-), 152.99535 (C3H6PO5-), 171.00600 (C3H8PO6-), 196.03767 (C5H11NPO5-), 214.04849 (C5H13NPO6-), 333.05933 (C9H18PO11-), 376.10141 (C11H23NPO11-) |                         |                                                                                                                                       |
|      | 8.73  | 566.27405 | 78.95774 (PO3-), 140.01099 (C2H7NPO4-), 302.06439 (C8H17NPO9-)                                                                                                                                                                                                                                                                     |                         |                                                                                                                                       |
| GPE  | 8.97  | 678.32660 | 59.01255 (C2H3O2-), 71.01257 (C3H3O2-), 78.95781 (PO3-), 89.02327 (C3H5O3-), 101.02337 (C4H5O3-), 113.02353 (C5H5O3-), 119.03414 (C4H7O4-), 140.01122 (C2H7NPO4-), 152.99541 (C3H6PO5-), 196.03793 (C5H11NPO5-), 214.048715041 (C11H23NPO11-)                                                                                      | 680.34070               | 86.06062 (C4H8NO+), 346.27405 (C22H36NO2+)                                                                                            |
| GPE  | 9.01  | 684.41022 | 59.01252 (C2H3O2-), 71.01253 (C3H3O2-), 78.95779 (PO3-), 96.96846 (H2PO4-), 140.01132 (C2H7NPO4-), 152.99547 (C3H6PO5-), 171.00615 (C3H8PO6-), 214.04858 (C5H13NPO6-), 376.10132 (C11H23NPO11-), 652.30872 (C29H51NPO13-)                                                                                                          | 686.42472               |                                                                                                                                       |
| GPE  | 9.07  | 654.32684 | 59.01255 (C2H3O2-), 71.01257 (C3H3O2-), 78.95781 (PO3-), 89.02325 (C3H5O3-), 101.02335 (C4H5O3-), 113.02352 (C5H5O3-), 119.03412 (C4H7O4-), 140.01122 (C2H7NPO4-), 152.99545 (C3H6PO5-), 196.03806 (C5H11NPO5-), 214.04872 (C5H13NPO6-), 333.05911 (C9H18PO11-), 376.10132 (C11H23NPO11-)                                          | 656.34082               | 86.06062 (C4H8NO+), 322.27408 (C20H36NO2+)                                                                                            |
| GPE  | 9.08  | 682.39417 | 78.95781 (PO3-), 140.01123 (C2H7NPO4-), 152.99542 (C3H6PO5-), 171.00623 (C3H8PO6-), 214.04877 (C5H13NPO6-)                                                                                                                                                                                                                         | 684.40867               |                                                                                                                                       |
|      | 9.24  | 726.25671 |                                                                                                                                                                                                                                                                                                                                    |                         |                                                                                                                                       |
| GPE  | 9.36  | 478.25769 | 78.95780 (PO3-), 140.01129 (C2H7NPO4-), 152.99544 (C3H6PO5-), 171.00621 (C3H8PO6-), 214.04857 (C5H13NPO6-)                                                                                                                                                                                                                         | 480.27219               |                                                                                                                                       |
| ascr | 9.58  | 514.37555 | 73.02817 (C3H5O2-), 83.04894 (C5H7O-), 86.02350 (C3H4NO2-), 111.04424 (C6H7O2-), 297.28006 (C19H37O2-), 427.34241 (C25H47O5-)                                                                                                                                                                                                      | 516.39005,<br>538.37115 |                                                                                                                                       |
|      | 9.59  | 567.33087 | 78.95782 (PO3-), 96.96853 (H2PO4-)                                                                                                                                                                                                                                                                                                 | 569.34537               |                                                                                                                                       |
| ascr | 9.86  | 576.41205 | 100.03931 (C4H6NO2-), 102.05501 (C4H8NO2-), 427.34274 (C25H47O5-), 512.39484 (C29H54NO6-)                                                                                                                                                                                                                                          | 532.42105               | 62.06082 (C2H8NO+), 366.33664 (C23H44NO2+), 384.34717 (C23H46NO3+), 402.35773 (C23H48NO4+)                                            |
| EA   | 10.09 | 298.23895 | 57.03328 (C3H5O-), 86.02362 (C3H4NO2-), 211.20676 (C14H27O-)                                                                                                                                                                                                                                                                       | 300.25345               | 62.06085 (C2H8NO+), 86.06062 (C4H8NO+), 282.24265 (C17H32NO2+)                                                                        |
| ascr | 10.16 | 528.39063 | 57.03336 (C3H5O-), 59.01258 (C2H3O2-), 71.01260 (C3H3O2-), 73.02824 (C3H5O2-), 83.04904 (C5H7O-), 86.02357 (C3H4NO2-), 111.04421 (C6H7O2-), 311.29575 (C20H39O2-), 441.35840 (C26H49O5-), 482.31137 (C26H44NO7-)                                                                                                                   | 530.40513               | 62.06082 (C2H8NO+), 86.06062 (C4H8NO+), 364.32083 (C23H43NO2+), 382.33154 (C23H44NO3), 400.34213 (-130, C23H46NO4+)                   |
| ascr | 10.49 | 542.40674 | 73.02822 (C3H5O2-), 83.04907 (C5H7O-), 86.02354 (C3H4NO2-), 111.04407 (C6H7O2-), 325.31116 (C21H41O2-), 455.37375 (C27H51O5-)                                                                                                                                                                                                      | 544.42124               | 62.06082 (C2H8NO+), 86.06062 (C4H8NO+), 353.30499 (C22H41O3+), 378.33673 (C24H44NO2+), 396.34735 (C24H46NO3+), 414.35809 (C24H48NO4+) |
| EA   | 10.69 | 324.25464 | 57.03329 (C3H5O-), 86.02351 (C3H4NO2-), 237.22223 (C16H29O-)                                                                                                                                                                                                                                                                       | 326.26914               | 62.06082 (C2H8NO+), 86.06059 (C4H8NO+), 308.25830                                                                                     |

|      |       |           |                                                                                                                                                                                          |                         |                                                                                                                                                                                                                     |
|------|-------|-----------|------------------------------------------------------------------------------------------------------------------------------------------------------------------------------------------|-------------------------|---------------------------------------------------------------------------------------------------------------------------------------------------------------------------------------------------------------------|
|      |       |           |                                                                                                                                                                                          |                         | (C19H34NO2+)                                                                                                                                                                                                        |
|      | 10.70 | 387.25034 |                                                                                                                                                                                          |                         |                                                                                                                                                                                                                     |
| EA   | 10.88 | 358.26022 |                                                                                                                                                                                          | 314.26922               | 62.06087 (C2H8NO+), 86.06064 (C4H8NO+), 296.25848 (C18H34NO2+)                                                                                                                                                      |
| ascr | 11.04 | 556.42255 | 73.02824 (C3H5O2-), 83.04900 (C5H7O-), 86.02356 (C3H4NO2-), 111.04422 (C6H7O2-), 339.32706 (C22H43O2-), 469.39001 (C28H53O5-)                                                            | 558.43705               |                                                                                                                                                                                                                     |
|      | 11.31 | 724.44159 | 78.95779 (PO3-), 96.96851 (H2PO4-), 140.01117 (C2H7NPO4-), 152.99538 (C3H6PO5-), 171.00610 (C3H8PO6-), 214.04857 (C5H13NPO6-)                                                            | 726.45581               | 100.07612 (C5H10NO+), 424.37854 (C26H50NO3+)                                                                                                                                                                        |
| ascr | 11.55 | 616.44391 | 73.02824 (C3H5O2-), 83.04900 (C5H7O-), 86.02357 (C3H4NO2-), 111.04422 (C6H7O2-), 353.34253 (C23H45O2-), 483.40524 (C29H55O5-)                                                            | 572.45291               | 62.06082 (C2H8NO+), 100.07610 (C5H10NO+), 406.36783 (C26H48NO2+), 424.37854 (C26H50NO3+), 442.38919 (C26H52NO4+)                                                                                                    |
| ascr | 11.74 | 719.45984 | 57.03336 (C3H5O-), 59.01258 (C2H3O2-), 71.01260 (C3H3O2-), 73.02824 (C3H5O2-), 83.04904 (C5H7O-), 86.02357 (C3H4NO2-), 111.04421 (C6H7O2-), 381.33804 (C24H45O3-), 511.40027 (C30H55O6-) | 692.49542,<br>697.45056 | 85.02898 (C4H5O2+), 113.05997 (C6H9O2+), 127.03905 (C6H7O3+), 131.07034 (C6H11O3+), 145.04958 (C6H9O4+), 291.30438 (C21H39+), 319.33578 (C23H43+), 329.32019 (C24H41+), 347.33072 (C24H43O+), 365.34137 (C24H45O2+) |
| ascr | 12.37 | 644.47552 | 71.01260 (C3H3O2-), 73.02824 (C3H5O2-), 83.04904 (C5H7O-), 86.02357 (C3H4NO2-), 111.04421 (C6H7O2-), 381.37323 (C25H49O2-), 511.43613 (C31H59O5-)                                        | 600.48452               | 62.06082 (C2H8NO+), 100.07616 (C5H10NO+), 434.39944 (C28H52NO2+), 452.41019 (C28H54NO3+), 470.42041 (C28H56NO4+)                                                                                                    |
| ascr | 12.57 | 747.49164 | 57.03336 (C3H5O-), 59.01258 (C2H3O2-), 71.01260 (C3H3O2-), 73.02824 (C3H5O2-), 83.04904 (C5H7O-), 86.02357 (C3H4NO2-), 111.04421 (C6H7O2-), 409.36755 (C26H49O3-), 539.43164 (C32H59O6-) | 720.52637,<br>725.48145 |                                                                                                                                                                                                                     |

**Table S8. Differential metabolites from *C. elegans* L1 medium, ES+ mode, that are decreased or absent in N2 medium compared to *daf-22*. Peaks that are also in growth medium table (ES+) are shown in bold red. Entries that have a corresponding peak in the ES- table are shaded grey.**

| class | rt (min) | m/z (ES+)        | MS/MS (ES+)                                                                                                                                                                     | m/z (ES-)               |
|-------|----------|------------------|---------------------------------------------------------------------------------------------------------------------------------------------------------------------------------|-------------------------|
| GPE   | 1.08     | 488.04901        | see L1s, ES- table                                                                                                                                                              |                         |
| GPE   | 1.13     | 325.99576        | see L1s, ES- table                                                                                                                                                              |                         |
|       | 1.16     | 363.95160        |                                                                                                                                                                                 |                         |
|       | 3.08     | 268.66348        |                                                                                                                                                                                 | 534.30521               |
|       | 3.52     | 339.10535        | 177.05209 (C8H1003Na+)                                                                                                                                                          |                         |
|       | 3.99     | 573.27435        |                                                                                                                                                                                 |                         |
|       | 4.02     | 345.70026        | 120.08106 (C8H10N+)                                                                                                                                                             |                         |
|       | 4.41     | 298.20035        | 136.06168 (C5H5N5+), 253.16586 (C12H21N4O2+)                                                                                                                                    |                         |
|       | 4.68     | 330.22775        | 85.02892 (C4H5O2+), 144.10184 (C7H14NO2+), 151.1176 (C10H15O+), 169.12222 (C10H17O2+), 253.14336 (C14H21O4+), 271.15396 (C14H23O5+)                                             |                         |
|       | 4.72     | 344.20703        | 60.08154 (C3H10N+), 85.02892 (C4H5O2+), 137.09604 (C9H13O+), 144.10184 (C7H14NO2+), 165.09099 (C10H13O2+), 201.11194 (C10H17O4+), 267.122256 (C14H19O5+), 285.13297 (C14H21O6+) |                         |
|       | 4.75     | 418.77179        | 112.08730 (C5H10N3+), 130.04994 (C5H8NO3+), 147.07623 (C5H11N2O3+), 183.14906 (C10H19N2O+), 226.67082 (z=2), 253.16588 (C12H21N4O2+), 289.19397, 331.73895 (z=2), 367.24518     | 834.52246               |
|       | 4.76     | 374.25394        | 135.11681 (C10H15+), 153.12740 (C10H17O+), 297.16895 (C16H25O5+)                                                                                                                |                         |
|       | 4.81     | 388.23331        | 121.10131 (C9H13+), 131.08559 (C10H11+), 144.10196 (C7H14NO2+), 149.09607 (C10H13O+), 167.10670 (C10H15O2+), 191.10678 (C12H15O2+), 293.13879 (C16H21O5+)                       |                         |
|       | 4.82     | 441.79276        |                                                                                                                                                                                 |                         |
|       | 5.03     | 354.74237        |                                                                                                                                                                                 |                         |
|       | 5.10     | 771.38885        | 127.08683 (C6H11N2O+), 341.14551 (C14H21N4O6+)                                                                                                                                  | 769.37435               |
|       | 5.15     | 415.23047        |                                                                                                                                                                                 | 427.21091,<br>437.23984 |
|       | 5.17     | 413.21500        |                                                                                                                                                                                 | 425.19565,<br>435.22421 |
|       | 5.22     | 354.22522        |                                                                                                                                                                                 | 366.20572,<br>376.23465 |
|       | 5.60     | 285.25372        | 84.08130 (C5H10N+), 114.09156 (C6H12NO+), 143.11787 (C7H15N2O+)                                                                                                                 |                         |
| EA    | 5.63     | 362.25375        | 62.06079 (C2H8NO+), 290.21140 (C18H28NO2+), 308.22195 (C18H30NO3+), 326.23248 (C18H32NO4+), 344.24329 (C18H32NO5+)                                                              | 360.23925               |
|       | 5.64     | 830.47778        | 167.08136 (C8H11N2O2+), 185.12860 (C9H17N2O2+), 186.12352 (C8H16N3O2+), 212.10272 (C9H14N3O3+), 242.14987 (C11H20N3O3+), 311.17142 (C14H23N4O4+), 476.24997 (C23H34N5O6+)       | 828.46328               |
|       | 5.65     | 416.26434        | 60.08151 (C3H10N+), 85.02892 (C4H5O2+), 177.12743 (C12H17O+), 195.13831 (C12H19O2+)                                                                                             |                         |
|       | 5.67     | 389.25345        |                                                                                                                                                                                 |                         |
|       | 5.72     | 378.24869        | see L1s, ES- table                                                                                                                                                              |                         |
| EA    | 5.81     | 346.25888        | 62.06081 (C2H8NO+), 292.22690 (C18H30NO2+), 310.23761 (C18H32NO3+), 328.24811 (C18H34NO4+)                                                                                      | 380.22134,<br>390.25034 |
|       | 5.84     | <b>212.20097</b> | see growth medium, ES+ table                                                                                                                                                    |                         |
|       | 5.92     | 452.24112        | see L1s, ES- table                                                                                                                                                              |                         |
|       | 5.97     | <b>213.18491</b> |                                                                                                                                                                                 | 229.18088               |
|       | 5.98     | 403.26901        | 205.19522 (C15H25+), 223.20561 (C15H27O+), 241.21617 (C15H29O2+)                                                                                                                |                         |
|       | 6.05     | 376.26947        | see L1s, ES- table                                                                                                                                                              |                         |
|       | 6.08     | 226.21664        | 84.08131 (C5H10N+)                                                                                                                                                              |                         |
|       | 6.12     | <b>211.16937</b> |                                                                                                                                                                                 |                         |
|       | 6.14     | 380.24088        | 69.03419 (C4H5O+), 87.04450 (C4H7O2+), 183.17429 (C12H23O+); do MS/MS on 358.25894                                                                                              | 356.24493,<br>392.22183 |
| EA    | 6.14     | <b>340.24838</b> | 62.06080 (C2H8NO+), 86.06053 (C4H8NO+), 237.18478 (C15H25O2+), 279.19528 (C17H27O3+), 322.23740 (C19H32NO3+)                                                                    |                         |
| EA    | 6.16     | 362.29004        | 62.06081 (C2H8NO+), 308.25858 (C19H34NO2+), 326.26901 (C19H36NO3+), 344.27939 (C19H38NO4+)                                                                                      | 396.25222               |
|       | 6.21     | 412.20975        | see L1s, ES- table                                                                                                                                                              |                         |
|       | 6.23     | <b>356.24313</b> | see growth medium, ES+ table                                                                                                                                                    | 354.22863,<br>390.20596 |
|       | 6.49     | 417.28479        | 219.21074 (C16H27+), 237.22116 (C16H29O+), 255.23122 (C16H31O2+)                                                                                                                |                         |
| EA    | 6.54     | <b>376.30569</b> | 62.06078 (C2H8NO+), 322.27393 (C20H36NO2+), 340.28488 (C20H38NO3+), 358.29626 (C20H40NO4+)                                                                                      | 410.26852               |
|       | 6.65     | 386.19925        | see L1s, ES- table                                                                                                                                                              |                         |

|      |                  |                                                                                                                                                                                                                                                                                 |           |
|------|------------------|---------------------------------------------------------------------------------------------------------------------------------------------------------------------------------------------------------------------------------------------------------------------------------|-----------|
| 6.68 | 314.23239        | 60.05184 (C3H10N+), 85.02892 (C4H5O2+), 144.10190 (C7H14NO2+), 153.12735 (C10H17O+), 171.13786 (C10H19O2+), 255.15886 (C14H23O4+)                                                                                                                                               |           |
| 6.73 | 452.30060        | 85.02895 (C4H5O2+), 273.18436 (C18H25O2+), 375.21649 (C22H31O5+), 393.22708 (C22H33O6+)                                                                                                                                                                                         |           |
| 6.79 | <b>225.18486</b> |                                                                                                                                                                                                                                                                                 |           |
| 6.84 | <b>316.24826</b> | 60.08155 (C3H10N+), 85.02895 (C4H5O2+), 257.17453 (C14H25O4+)                                                                                                                                                                                                                   |           |
| 6.90 | 492.23935        | 94.03932 (C4H7ONa+, rad), 139.02379 (C4H6NO3Na+, rad), 152.03181 (C5H7NO3Na+, rad), 162.10141 (C9H15ONa+, rad), 175.10938 (C10H16ONa+), 201.00661 (C5H8NSO4Na+, rad), 246.15909 (C14H23O2Na+, rad), 315.22937 (C19H32O2Na+), 331.22385 (C19H32O3Na+), 363.19620 (C19H32NSO3Na+) | 468.24344 |
| 6.99 | 490.22336        | 104.10735 (C5H14NO+), 173.09363 (C10H14ONa+), 244.14357 (C14H21O2Na+, rad), 313.21317 (C19H30O2Na+), 318.24271 (C20H32NO2+), 329.20874 (C19H30O3Na+), 361.18066 (C19H30O5Na+)                                                                                                   | 466.22726 |
| 7.13 | 310.23770        | 56.05031 (C3H6N+), 82.06567 (C5H8N+), 238.21642 (C15H28NO+), 250.21645 (C16H28NO+), 280.22687 (C17H30NO2+), 292.22681 (C18H30NO2+)                                                                                                                                              |           |
| 7.30 | 442.14282        |                                                                                                                                                                                                                                                                                 | 418.14627 |
| 7.38 | 374.29007        | 60.08155 (C3H10N+), 85.02895 (C4H5O2+), 144.10207 (C7H14NO2+), 159.06509 (C7H11O4+), 297.20575 (C17H29O4+), 315.21606 (C17H31O5+)                                                                                                                                               |           |
| 7.44 | 381.18024        |                                                                                                                                                                                                                                                                                 |           |
| 7.47 | 526.20038        |                                                                                                                                                                                                                                                                                 | 502.20398 |
| 7.47 | 291.19290        |                                                                                                                                                                                                                                                                                 |           |
| 7.54 | 434.26682        | 60.08155 (C3H10N+), 85.02895 (C4H5O2+), 291.17218 (C15H28O3Cl+)                                                                                                                                                                                                                 |           |
| 7.56 | 263.20047        |                                                                                                                                                                                                                                                                                 |           |
| 7.60 | 347.21927        |                                                                                                                                                                                                                                                                                 |           |
| 7.62 | 239.20047        |                                                                                                                                                                                                                                                                                 |           |
| 7.63 | 410.29007        |                                                                                                                                                                                                                                                                                 |           |
| 7.65 | 355.24802        |                                                                                                                                                                                                                                                                                 | 353.23352 |
| 7.72 | 594.29626        | 60.08156 (C3H10N+), 71.07362 (C4H9N+, rad), 86.09695 (C5H12N+), 104.10733 (C5H14NO+), 124.99993 (C2H6PO4+), 184.07332 (C5H15NPO4+)                                                                                                                                              |           |
| 7.75 | 253.21611        |                                                                                                                                                                                                                                                                                 |           |
| 7.81 | 311.13843        |                                                                                                                                                                                                                                                                                 |           |
| 8.08 | 325.15414        |                                                                                                                                                                                                                                                                                 |           |
| 8.09 | 307.22687        |                                                                                                                                                                                                                                                                                 |           |
| 8.34 | 322.21442        | 215.17961 (C16H23+), 233.19017 (C16H25O+), 269.16653 (C16H26OCl+), 287.17709 (C16H28O2Cl+)                                                                                                                                                                                      |           |
| 8.37 | 336.25333        | 62.06080 (C2H8NO+), 142.08620 (C7H12NO2+), 229.19518 (C17H25+), 257.18985 (C18H25O+), 275.20068 (C18H27O2+), 318.24252 (C20H32NO2+)                                                                                                                                             |           |
| 8.39 | 351.14899        |                                                                                                                                                                                                                                                                                 |           |
| 8.45 | 277.25278        |                                                                                                                                                                                                                                                                                 |           |
| 8.48 | 644.34147        | see L1s, ES- table                                                                                                                                                                                                                                                              |           |
| 8.56 | 476.24466        | 139.02397 (C4H6NO3Na+, rad), 152.03172 (C5H7NO3Na+), 184.00375 (C5H7NSO3Na+), 201.00694 (C5H8NSO4Na+, rad), 297.21893 (C19H30ONa+), 299.23489 (C19H32ONa+), 304.26306 (C20H34NO+), 315.22910 (C19H32O2Na+), 347.20117 (C19H32SO2Na+)                                            | 452.24811 |
| 8.61 | 516.30872        | see L1s, ES- table                                                                                                                                                                                                                                                              |           |
| 8.62 | 528.30847        | 60.08155 (C3H10N+), 86.09694 (C5H12N+), 104.10733 (C5H14NO+), 124.99994 (C2H6PO4+), 184.07327 (C5H15NPO4+)                                                                                                                                                                      | 526.29397 |
| 8.62 | 492.30853        | 60.08155 (C3H10N+), 86.09694 (C5H12N+), 104.10733 (C5H14NO+), 124.99994 (C2H6PO4+), 184.07327 (C5H15NPO4+)                                                                                                                                                                      |           |
| 8.67 | 416.37360        |                                                                                                                                                                                                                                                                                 |           |
| 8.92 | 325.23730        | 271.20544 (C19H27O+), 289.21613 (C19H29O2+), 307.22672 (C19H31O3+)                                                                                                                                                                                                              |           |
| 8.99 | 331.22424        |                                                                                                                                                                                                                                                                                 |           |
| 9.09 | 542.32428        | 60.08155 (C3H10N+), 86.09694 (C5H12N+), 104.10733 (C5H14NO+), 124.99994 (C2H6PO4+), 184.07327 (C5H15NPO4+)                                                                                                                                                                      |           |
| 9.14 | 506.32422        | 60.08155 (C3H10N+), 86.09694 (C5H12N+), 104.10733 (C5H14NO+), 124.99994 (C2H6PO4+), 184.07327 (C5H15NPO4+)                                                                                                                                                                      |           |
| 9.15 | 787.42712        | 85.02894 (C4H5O2+), 134.03667 (C5H9NOCl+)                                                                                                                                                                                                                                       |           |
| 9.16 | 530.32452        | 60.08155 (C3H10N+), 86.09694 (C5H12N+), 104.10733 (C5H14NO+), 124.99994 (C2H6PO4+), 184.07327 (C5H15NPO4+)                                                                                                                                                                      |           |
| 9.27 | 512.39478        | 85.02897 (C4H5O2+), 144.10190 (C7H14NO2+), 305.28433 (C21H37O+), 369.30002 (C22H41O4+), 407.31534 (C25H43O4+), 435.30972 (C26H43O5+)                                                                                                                                            |           |
| 9.35 | 616.47864        | 60.08154 (C3H10N+), 85.02895 (C4H5O2+), 104.10737 (C5H14NO+), 113.06002 (C6H9O2+), 144.10196 (C7H14NO2+), 409.33038 (C25H45O4+), 486.41678 (C28H56NO5+)                                                                                                                         |           |
| 9.41 | 481.34991        |                                                                                                                                                                                                                                                                                 |           |
| 9.43 | 365.18530        |                                                                                                                                                                                                                                                                                 |           |
| 9.43 | 633.42395        | 60.08154 (C3H10N+), 85.02893 (C4H5O2+), 134.03668 (C5H9NOCl+)                                                                                                                                                                                                                   |           |
| 9.51 | 544.33984        | 60.08155 (C3H10N+), 86.09694 (C5H12N+), 104.10732 (C5H14NO+), 124.99992 (C2H6PO4+), 184.07329 (C5H15NPO4+)                                                                                                                                                                      |           |
| 9.54 | 498.41559        | 85.02897 (C4H5O2+), 144.10196 (C7H14NO2+), 319.30029 (C22H39O+), 421.33096                                                                                                                                                                                                      |           |

|       |                |  |                                                                                                                                                                                                                                                                                                                                                                                                                                         |           |
|-------|----------------|--|-----------------------------------------------------------------------------------------------------------------------------------------------------------------------------------------------------------------------------------------------------------------------------------------------------------------------------------------------------------------------------------------------------------------------------------------|-----------|
|       |                |  | (C26H45O4+), 439.34210 (C26H47O5+)                                                                                                                                                                                                                                                                                                                                                                                                      |           |
| 9.55  | 514.41064      |  | 60.08154 (C3H10N+), 85.02893 (C4H5O2+), 144.10188 (C7H14NO2+), 307.29919 (C21H39O+), 335.29385 (C22H39O2+), 371.31561 (C22H43O4+), 437.32651 (C26H45O5+)                                                                                                                                                                                                                                                                                |           |
| 9.60  | 532.34027      |  | 60.08157 (C3H10N+), 86.09695 (C5H12N+), *104.10734 (C5H14NO+), 124.99996 (C2H6PO4+), 184.07332 (C5H15NPO4+), (* big in 2nd peak, which may be indicative of 1-acyl-lysoPC regioisomer, JACS, 1996, 118, 451; this elution order, sn-2 first, is consistent with literature, Lipids, 1985, 20, 922)                                                                                                                                      |           |
| 9.63  | 526.41052<br>? |  |                                                                                                                                                                                                                                                                                                                                                                                                                                         |           |
| 9.66  | 614.46283      |  | 60.08158 (C3H10N+), 104.10739 (C5H14NO+), 144.10191 (C7H14NO2+)                                                                                                                                                                                                                                                                                                                                                                         |           |
| 9.69  | 520.34003      |  | 60.08157 (C3H10N+), 86.09695 (C5H12N+), *104.10734 (C5H14NO+), 124.99996 (C2H6PO4+), 184.07332 (C5H15NPO4+), (* big in 2nd peak, which may be indicative of 1-acyl-lysoPC regioisomer, JACS, 1996, 118, 451; this elution order, sn-2 first, is consistent with literature, Lipids, 1985, 20, 922)                                                                                                                                      |           |
| 9.92  | 528.42584      |  | 60.08157 (C3H10N+), 85.02896 (C4H5O2+), 144.10199 (C7H14NO2+), 321.31601 (C22H41O+), 349.31030 (C23H41O2+), 385.33112 (C23H45O4+), 451.34134 (C27H47O5+)                                                                                                                                                                                                                                                                                |           |
| 9.93  | 495.36581      |  |                                                                                                                                                                                                                                                                                                                                                                                                                                         |           |
| 9.93  | 644.50989      |  | 60.08154 (C3H10N+), 85.02896 (C4H5O2+), 113.06007 (C6H9O2+), 144.10202 (C7H14NO2+), 437.36246 (C27H49O4+), 514.44727 (C30H60NO5+)                                                                                                                                                                                                                                                                                                       |           |
| 9.96  | 973.62537      |  |                                                                                                                                                                                                                                                                                                                                                                                                                                         | 971.61087 |
| 9.96  | 508.34021      |  | 60.08157 (C3H10N+), 86.09695 (C5H12N+), *104.10734 (C5H14NO+), 124.99996 (C2H6PO4+), 184.07332 (C5H15NPO4+), (* big in 2nd peak, which may be indicative of 1-acyl-lysoPC regioisomer, JACS, 1996, 118, 451; this elution order, sn-2 first, is consistent with literature, Lipids, 1985, 20, 922)                                                                                                                                      |           |
| 9.97  | 570.47314      |  | 85.02893 (C4H5O2+)                                                                                                                                                                                                                                                                                                                                                                                                                      |           |
| 10.06 | 540.42590      |  | 85.02893 (C4H5O2+)                                                                                                                                                                                                                                                                                                                                                                                                                      |           |
| 10.16 | 546.35553      |  | 60.08157 (C3H10N+), 86.09695 (C5H12N+), *104.10734 (C5H14NO+), 124.99996 (C2H6PO4+), 184.07332 (C5H15NPO4+), (* big in 2nd peak, which may be indicative of 1-acyl-lysoPC regioisomer, JACS, 1996, 118, 451; this elution order, sn-2 first, is consistent with literature, Lipids, 1985, 20, 922)                                                                                                                                      |           |
| 10.16 | 656.50995      |  | 60.08160 (C3H10N+), 85.02898 (C4H5O2+), 113.06004 (C6H9O2+), 144.10196 (C7H14NO2+), 347.33063 (C24H43O+), 365.34119 (C24H45O2+), 449.36194 (C28H49O4+), 467.37344 (C28H51O5+), 526.44751 (C31H60NO5+)                                                                                                                                                                                                                                   |           |
| 10.18 | 702.55139      |  | 60.08155 (C3H10N+), 85.02898 (C4H5O2+), 113.06006 (C6H9O2+), 144.10207 (C7H14NO2+), 572.48853 (C33H66NO6+)                                                                                                                                                                                                                                                                                                                              |           |
| 10.21 | 542.44220      |  | 60.08157 (C3H10N+), 85.02896 (C4H5O2+), 437.36276 (C27H49O4+)                                                                                                                                                                                                                                                                                                                                                                           |           |
| 10.29 | 526.44684      |  | 85.02897 (C4H5O2+)                                                                                                                                                                                                                                                                                                                                                                                                                      |           |
| 10.29 | 658.52570      |  | 85.02896 (C4H5O2+), 113.05994 (C6H9O2+), 528.46271 (C31H62NO5+)                                                                                                                                                                                                                                                                                                                                                                         |           |
| 10.37 | 265.21613      |  |                                                                                                                                                                                                                                                                                                                                                                                                                                         |           |
| 10.41 | 554.44147      |  | 85.02898 (C4H5O2+)                                                                                                                                                                                                                                                                                                                                                                                                                      |           |
| 10.62 | 556.45764      |  | 1st peak (10.6 min): 60.08154 (C3H10N+), 85.02895 (C4H5O2+); 2nd and 3rd peaks (12.3 and 12.6 min): 62.06079 (C2H8NO+), *319.33685 (C23H43+), 347.33087 (C24H43O+), *365.34143 (C24H45O2+), 408.38336 (C26H50NO2+), *409.36661 (C26H49O3+), 426.39410 (C26H52NO3+); (* only in 12.6 min peak)                                                                                                                                           |           |
| 10.66 | 672.54175      |  | 60.08157 (C3H10N+), 85.02895 (C4H5O2+), 113.05993 (C6H9O2+), 144.10181 (C7H14NO2+), 542.47760 (C32H64NO5+)                                                                                                                                                                                                                                                                                                                              |           |
| 10.72 | 684.54169      |  | 85.02895 (C4H5O2+), 113.05996 (C6H9O2+), 375.36206 (C26H47O+), 477.39417 (C30H53O4+), 554.47809 (C33H64NO5+)                                                                                                                                                                                                                                                                                                                            |           |
| 10.78 | 430.38940      |  | 62.06081 (C2H8NO+), 394.36786 (C25H48NO2+), 412.37866 (C25H50NO3+)                                                                                                                                                                                                                                                                                                                                                                      |           |
| 10.78 | 582.43451      |  |                                                                                                                                                                                                                                                                                                                                                                                                                                         |           |
| 10.84 | 686.55780      |  | 85.02895 (C4H5O2+), 113.06007 (C6H9O2+), 479.41135 (C30H55O4+), 556.49463 (C33H66NO5+)                                                                                                                                                                                                                                                                                                                                                  |           |
| 10.93 | 554.47858      |  | 85.02898 (C4H5O2+), *477.39398 (C30H53O4+); (* only 1st peak)                                                                                                                                                                                                                                                                                                                                                                           |           |
| 11.06 | 552.46289      |  | 85.02895 (C4H5O2+)                                                                                                                                                                                                                                                                                                                                                                                                                      |           |
| 11.16 | 496.24652      |  |                                                                                                                                                                                                                                                                                                                                                                                                                                         | 494.23202 |
| 11.26 | 478.35092      |  | see L1s, ES- table                                                                                                                                                                                                                                                                                                                                                                                                                      |           |
| 11.35 | 596.45032      |  |                                                                                                                                                                                                                                                                                                                                                                                                                                         |           |
| 11.35 | 700.57288      |  | 60.08157 (C3H10N+), 85.02895 (C4H5O2+), 113.06003 (C6H9O2+), 144.10194 (C7H14NO2+), 570.50946 (C33H68NO6+)                                                                                                                                                                                                                                                                                                                              |           |
| 11.41 | 596.39307      |  | see L1s, ES- table                                                                                                                                                                                                                                                                                                                                                                                                                      |           |
| 11.54 | 572.45306      |  | 62.06083 (C2H8NO+), 100.07604 (C5H10NO+), 406.36789 (C26H48NO2+), 424.37833 (C26H50NO3+), 442.38989 (C26H52NO4-)                                                                                                                                                                                                                                                                                                                        | 606.41524 |
| 11.74 | 492.36652      |  |                                                                                                                                                                                                                                                                                                                                                                                                                                         | 468.37036 |
| 11.86 | 440.37399      |  | 1st peak: 62.06079 (C2H8NO+), 100.07607 (C5H10NO+), 305.28406 (C21H37O+), 323.29443 (C21H39O2+), 341.30490 (C21H41O3+), 353.34052 (C23H45O2+), 379.32086 (C24H43O3+), 422.36273 (C26H48NO3+); 2nd peak: 62.06079 (C2H8NO+), 112.07593 (C6H10NO+), 315.30515 (C23H39+), 333.31534 (C23H41O+), 361.30966 (C24H41O2+), 376.35749 (C25H46NO+), 379.32065 (C24H43O3+), 397.33087 (C24H45O4+), 404.35217 (C26H46NO2+), 422.36282 (C26H48NO3+) | 438.35949 |

|    |       |           |                                                                                                                                                                                                               |                         |
|----|-------|-----------|---------------------------------------------------------------------------------------------------------------------------------------------------------------------------------------------------------------|-------------------------|
|    | 11.94 | 610.46613 |                                                                                                                                                                                                               | 622.44656               |
|    | 12.10 | 472.43677 | 62.06081 (C2H8NO+), 88.03981 (C3H6NO2+), 436.41513 (C28H54NO2+), 454.42581 (C28H56NO3+)                                                                                                                       | 636.46218               |
|    | 12.20 | 553.40826 |                                                                                                                                                                                                               | 529.41180               |
|    | 12.23 | 490.33005 | 134.03671 (C5H9NOCl+), 357.29968 (C21H41O4+), 454.30786 (C26H45NO3Cl+), 472.31897 (C26H47NO4Cl+)                                                                                                              | 488.31583               |
|    | 12.29 | 585.38977 |                                                                                                                                                                                                               |                         |
|    | 12.30 | 410.36310 | 303.30453 (C22H39+), 321.31506 (C22H41O+), 392.35214 (C25H46NO2+)                                                                                                                                             |                         |
|    | 12.31 | 426.39438 | 62.06079 (C2H8NO+), 291.30429 (C21H39+), 319.33661 (C23H43+), 329.32117 (C24H41+), 347.33054 (C24H43O+), 365.34131 (C24H45O2+), 408.38379 (C26H50NO2+), 409.36792 (C29H49O3+)                                 | 590.41982               |
|    | 12.36 | 600.48389 | see L1s, ES- table                                                                                                                                                                                            |                         |
|    | 12.38 | 628.39502 |                                                                                                                                                                                                               |                         |
|    | 12.63 | 509.38187 |                                                                                                                                                                                                               |                         |
|    | 12.71 | 567.42358 | see L1s, ES- table                                                                                                                                                                                            |                         |
| EA | 12.80 | 468.40546 | 62.06079 (C2H8NO+), 100.07603 (C5H10NO+), 333.31436 (C23H41O+), 351.32611 (C23H43O2+), 369.33624 (C23H45O3+), 381.37213 (C25H49O2+), 407.35168 (C26H47O3+), 450.39398 (C28H52NO3+)                            | 502.36764               |
|    | 12.80 | 476.35062 | 70.02942 (C3H4NO+), 88.03979 (C3H6NO2+), 134.03677 (C5H9NOCl+), 317.32022 (C23H41+), 335.33087 (C23H43O+), 404.35272 (C26H46NO2+), 422.36301 (C26H48NO3+), 440.32919 (C26H47NO2Cl+), 458.34283 (C26H49NO3Cl+) |                         |
|    | 13.05 | 581.43933 |                                                                                                                                                                                                               | 557.44293               |
|    | 13.09 | 353.34134 | 317.32022 (C23H41+), 335.33044 (C23H43O+)                                                                                                                                                                     |                         |
|    | 13.10 | 603.33820 |                                                                                                                                                                                                               |                         |
|    | 13.13 | 638.49731 |                                                                                                                                                                                                               | 650.47768               |
|    | 13.15 | 504.40286 |                                                                                                                                                                                                               |                         |
|    | 13.17 | 527.34802 |                                                                                                                                                                                                               |                         |
|    | 13.18 | 551.42889 |                                                                                                                                                                                                               |                         |
|    | 13.25 | 493.38693 |                                                                                                                                                                                                               |                         |
|    | 13.28 | 504.38174 | 70.02940 (C3H4NO+), 88.03978 (C3H6NO2+), 134.03679 (C5H9NOCl+), 345.35110 (C25H45+), 363.36221 (C25H47O+), 432.38382 (C28H50NO2+), 450.39468 (C28H52NO3+), 468.36044 (C28H51NO2Cl+), 486.37119 (C28H53NO3Cl+) |                         |
|    | 13.28 | 656.42676 | see L1s, ES- table                                                                                                                                                                                            |                         |
|    | 13.34 | 650.49725 |                                                                                                                                                                                                               |                         |
|    | 13.37 | 535.39728 |                                                                                                                                                                                                               |                         |
|    | 13.39 | 584.48938 | 62.06081 (C2H8NO+), *357.35150 (C26H45+), *375.36185 (C26H47O+), 436.41486 (C28H54NO2+), 454.42551 (C28H56NO3+); (* only in 2nd peak)                                                                         | 618.45156,<br>628.48253 |
|    | 13.57 | 524.34839 |                                                                                                                                                                                                               |                         |
|    | 13.66 | 567.46021 |                                                                                                                                                                                                               | 579.44049               |
|    | 13.69 | 595.45520 |                                                                                                                                                                                                               | 571.45880               |
|    | 13.69 | 507.40268 |                                                                                                                                                                                                               |                         |
|    | 13.76 | 474.39240 |                                                                                                                                                                                                               |                         |
|    | 13.96 | 516.42682 | 83.4968 (C5H7O+), 95.04945 (C6H7O+), 113.05993 (C6H9O2+), 173.08064 (C8H13O4+), 309.31577 (C21H41O+)                                                                                                          |                         |
|    | 14.05 | 620.48651 |                                                                                                                                                                                                               |                         |
|    | 14.07 | 573.41089 | 443.34735 (C24H47N2O5+), 499.37436 (C27H51N2O6+)                                                                                                                                                              |                         |
|    | 14.16 | 521.41827 |                                                                                                                                                                                                               |                         |
|    | 14.39 | 621.38745 | 455.34692 (C25H47N2O5+), 511.37341 (C28H51N2O6+)                                                                                                                                                              |                         |
|    | 14.46 | 563.42859 |                                                                                                                                                                                                               |                         |
|    | 14.53 | 537.41296 |                                                                                                                                                                                                               |                         |
|    | 14.59 | 587.42651 | 457.36313 (C25H49N2O5+), 513.38989 (C28H53N2O6+)                                                                                                                                                              |                         |
|    | 14.75 | 535.43359 |                                                                                                                                                                                                               |                         |
|    | 14.91 | 583.41003 |                                                                                                                                                                                                               | 595.39031               |
|    | 14.95 | 549.41284 |                                                                                                                                                                                                               |                         |
|    | 15.34 | 601.44214 | 471.37805 (C26H51N2O5+), 527.40527 (C29H55N2O6+)                                                                                                                                                              |                         |
|    | 15.38 | 549.44940 |                                                                                                                                                                                                               |                         |
|    | 15.81 | 565.44421 |                                                                                                                                                                                                               |                         |
|    | 15.97 | 605.43939 | see L1s, ES- table                                                                                                                                                                                            |                         |
|    | 16.10 | 563.46521 |                                                                                                                                                                                                               |                         |
|    | 16.32 | 577.44434 |                                                                                                                                                                                                               |                         |
|    | 16.47 | 615.43896 | 313.21350 (C19H30O2Na+), 325.21384 (C20H30O2Na+)                                                                                                                                                              | 591.44256               |
|    | 17.23 | 577.48041 |                                                                                                                                                                                                               |                         |
|    | 17.34 | 591.43872 | 289.21381 (C17H30O2Na+), 325.21375 (C20H30O2Na+)                                                                                                                                                              |                         |
|    | 18.10 | 723.57501 |                                                                                                                                                                                                               | 735.55529               |
|    | 18.18 | 591.49634 |                                                                                                                                                                                                               |                         |



**Table S9. Differential metabolites from *C. elegans* growth medium, ES+ mode, that are decreased or absent in N2 medium compared to *daf-22*. Peaks that are also in L1 medium table (ES+) are shown in bold red. Entries that have a corresponding peak in the ES- table are shaded grey.**

| class | rt (min) | m/z (ES+)        | MS/MS (ES+)                                                                                                                                                                                  | m/z (ES-)                        |
|-------|----------|------------------|----------------------------------------------------------------------------------------------------------------------------------------------------------------------------------------------|----------------------------------|
|       | 1.46     | 215.21187        | 70.06580 (C4H8N+), 84.08130 (C5H10N+), 86.09692 (C5H12N+), 98.09679 (C6H12N+), 103.12328 (C5H15N2+), 115.12318 (C6H15N2+), 198.18523 (C12H24NO+)                                             |                                  |
|       | 2.18     | 221.04144        | 193.00987 (C5H9N2S2O2+)                                                                                                                                                                      |                                  |
|       | 4.18     | 269.22241        | 100.07607 (C5H10NO+), 169.13344 (C9H17N2O+)                                                                                                                                                  |                                  |
|       | 4.80     | 431.12869        | 99.05568 (C4H7N2O+), 142.08632 (C7H12NO2+), 144.08078 (C10H10N+), 171.09138 (C11H11N2+), 251.11852 (C16H15N2O+), 339.13470 (C19H19N2O4+), 343.11182 (C18H19N2SO3+), 389.11661 (C19H21N2SO5+) |                                  |
|       | 4.87     | 320.27966        | 60.04518 (C2H6NO+), 266.24756 (C17H32NO+), 284.25821 (C17H34NO2+), 302.26874 (C17H36NO3+)                                                                                                    |                                  |
|       | 5.02     | 249.13449        | 105.03378 (C7H5O+), 137.04578 (C5H5N4O+)                                                                                                                                                     |                                  |
|       | 5.67     | <b>212.20111</b> | 84.08130 (C5H10N+)                                                                                                                                                                           |                                  |
| EA    | 5.69     | 218.17520        | 62.06082 (C2H8NO+), 182.15390 (C11H20NO+), 183.13797 (C11H19O2+), 200.16452 (C11H22NO2+)                                                                                                     | 252.13738, 262.16626             |
|       | 5.83     | 458.25159        | 86.06059 (C4H8N+), 98.06049 (C5H8NO+), 250.21637 (C16H28NO+), 268.22693 (C16H30NO2+), 286.23761 (C16H32NO3+)                                                                                 | 456.23679                        |
| EA    | 5.92     | 360.27460        | 62.06084 (C2H8NO+), 306.24261 (C19H32NO2+), 324.25323 (C19H34NO3+), 342.26385 (C19H36NO4+)                                                                                                   | 394.23678, 404.26605             |
|       | 5.94     | <b>213.18507</b> |                                                                                                                                                                                              |                                  |
|       | 5.94     | 216.15970        | see growth medium, ES- table                                                                                                                                                                 |                                  |
|       | 5.94     | 296.25851        | first two peaks: 84.08133 (C5H10N+); third peak: 70.06580 (C4H8N+)                                                                                                                           |                                  |
|       | 6.09     | <b>211.16954</b> |                                                                                                                                                                                              |                                  |
|       | 6.11     | <b>340.24866</b> | see L1, ES+ table                                                                                                                                                                            |                                  |
| EA    | 6.22     | 390.28503        | 62.06081 (C2H8NO+), 318.24298 (C20H32NO2+), 336.25311 (C20H34NO3+), 354.26340 (C20H36NO4+), 372.27420 (C20H38NO5+)                                                                           | 388.27053                        |
|       | 6.26     | <b>356.24326</b> | 60.08157 (C3H10N+), 85.02896 (C4H5O2+), 213.07552 (C10H13O5+), 297.16946 (C16H25O5+)                                                                                                         |                                  |
| EA    | 6.28     | 372.27454        | see growth medium, ES- table                                                                                                                                                                 |                                  |
| EA    | 6.35     | <b>376.30582</b> | see L1, ES+ table                                                                                                                                                                            | 410.26816, 420.29709             |
| GPE   | 6.39     | 662.35211        | 86.06057 (C4H8NO+), 292.26315 (C19H34NO+), 310.27393 (C19H36NO2+), 328.28430 (C19H38NO3+)                                                                                                    | 660.33761                        |
| EA    | 6.40     | 388.26953        | 62.06081 (C2H8NO+), 86.06059 (C4H8NO+), 249.18483 (C16H25O2+), 291.19537 (C18H27O3+), 309.20581 (C18H29O4+), 334.23749 (C20H32NO3+), 352.24820 (C20H34NO4+), 370.25839 (C20H36NO5+)          | 386.25528                        |
|       | 6.42     | 435.21460        | see growth medium, ES- table                                                                                                                                                                 |                                  |
| GPE   | 6.44     | 672.33612        | see growth medium, ES- table                                                                                                                                                                 |                                  |
| GPE   | 6.50     | 660.33594        | see growth medium, ES- table                                                                                                                                                                 |                                  |
| EA    | 6.54     | 300.25317        | 62.06081 (C2H8NO+), 282.24252 (C17H32NO2+)                                                                                                                                                   |                                  |
| EA    | 6.54     | 374.28995        | 62.06081 (C2H8NO+), 86.06056 (C4H8NO+), 277.21600 (C18H29O2+), 295.22662 (C18H31O3+), 320.25821 (C20H34NO2+), 338.26865 (C20H36NO3+), 356.27927 (C20H38NO4+)                                 | 372.27545, 408.25259             |
| EA    | 6.57     | 304.24826        | see growth medium, ES- table                                                                                                                                                                 |                                  |
|       | 6.60     | 514.37439        | 84.08134 (C5H10N+), 352.32108 (C22H42NO2+), 384.34674 (C23H46NO3+)                                                                                                                           |                                  |
| GPE   | 6.63     | 648.33557        | see growth medium, ES- table                                                                                                                                                                 |                                  |
|       | 6.68     | 384.31094        | first two peaks: 84.08134 (C5H10N+); third peak: 62.06083 (C2H8NO+), 86.06061 (C4H8NO+), 299.25803 (C18H35O3+), 323.25809 (C20H35O3+), 366.30029 (C22H40NO3+)                                |                                  |
|       | 6.69     | 392.31598        | 84.08132 (C5H10N+)                                                                                                                                                                           |                                  |
|       | 6.70     | 310.27408        | 84.08134 (C5H10N+)                                                                                                                                                                           |                                  |
|       | 6.76     | <b>225.18495</b> |                                                                                                                                                                                              |                                  |
| EA    | 6.78     | <b>316.24820</b> | see growth medium, ES- table                                                                                                                                                                 | 314.23407                        |
|       | 6.83     | 321.20358        | see growth medium, ES- table                                                                                                                                                                 |                                  |
|       | 6.85     | 394.27994        | 179.17934 (C13H23+), 197.18999 (C13H25O+)                                                                                                                                                    |                                  |
|       | 6.86     | 492.31693        | see growth medium, ES- table                                                                                                                                                                 |                                  |
| GPE   | 6.88     | 674.35205        | see growth medium, ES- table                                                                                                                                                                 |                                  |
| EA    | 6.92     | 398.29037        | see growth medium, ES- table                                                                                                                                                                 |                                  |
|       | 6.96     | 352.28479        | 84.08133 (C5H10N+)                                                                                                                                                                           |                                  |
|       | 7.00     | 330.26389        | 62.06081 (C2H8NO+), 86.06056 (C4H8NO+), 294.24258 (C18H32NO2+), 312.25308 (C18H34NO3+)                                                                                                       | 8.1 min peak has HCl (364.22607) |

|     |      |           |                                                                                                                                                                                                                                              |                                            |
|-----|------|-----------|----------------------------------------------------------------------------------------------------------------------------------------------------------------------------------------------------------------------------------------------|--------------------------------------------|
|     |      |           |                                                                                                                                                                                                                                              | and FA<br>(374.25500)<br>adducts in<br>ES- |
|     | 7.03 | 638.37524 | see growth medium, ES- table                                                                                                                                                                                                                 |                                            |
|     | 7.07 | 318.26389 | see comments                                                                                                                                                                                                                                 |                                            |
|     | 7.08 | 324.28989 | first two peaks have only 84.08130 (C5H10N+), third peak has only 70.06583 (C4H8N+)                                                                                                                                                          |                                            |
|     | 7.13 | 396.27466 | see growth medium, ES- table                                                                                                                                                                                                                 |                                            |
|     | 7.18 | 336.28970 | 84.08128 (C5H10N+)                                                                                                                                                                                                                           |                                            |
|     | 7.20 | 550.35095 | 70.06580 (C4H8N+), 84.08132 (C5H10N+), 340.32089 (C21H42NO2+)                                                                                                                                                                                |                                            |
|     | 7.21 | 389.20892 | see growth medium, ES- table                                                                                                                                                                                                                 |                                            |
|     | 7.24 | 385.25861 |                                                                                                                                                                                                                                              | 419.22079,<br>429.24957                    |
|     | 7.25 | 610.38037 |                                                                                                                                                                                                                                              |                                            |
| GPE | 7.32 | 756.44116 | see growth medium, ES- table                                                                                                                                                                                                                 |                                            |
|     | 7.37 | 325.23749 |                                                                                                                                                                                                                                              | 359.19967,<br>369.22858                    |
|     | 7.39 | 640.39105 | 85.02896 (C4H5O2+), 127.03909 (C6H7O3+), 145.04955 (C6H9O4+), 245.22630 (C18H29+), 263.23669 (C18H31O+), 281.24734 (C18H33O2+), 325.11313 (C12H21O10+), 389.26929 (C24H37O4+), 407.27963 (C24H39O5+)                                         | 621.35006                                  |
|     | 7.41 | 493.27768 | see growth medium, ES- table                                                                                                                                                                                                                 |                                            |
|     | 7.44 | 548.28595 | see growth medium, ES- table                                                                                                                                                                                                                 |                                            |
|     | 7.45 | 239.20071 |                                                                                                                                                                                                                                              |                                            |
|     | 7.47 | 274.27393 | 7.55 min: 70.06580 (C4H8N+), 88.07617 (C4H10NO+), 102.09171 (C5H12NO+), 106.08656 (C4H12NO2+); 8.15 min: 60.04519 (C2H6NO+), 226.25287 (C15H32N+), 238.25284 (C16H32N+), 256.26331 (C16H34NO+)                                               |                                            |
|     | 7.54 | 263.20059 |                                                                                                                                                                                                                                              |                                            |
|     | 7.58 | 564.36646 | *70.06580 (C4H8N+), 84.08133 (C5H10N+), 354.33646 (C22H44NO2+); (* only in 2nd peak)                                                                                                                                                         |                                            |
|     | 7.61 | 356.27948 | 7.6 min: 62.06080 (C2H8NO+), 320.25815 (C20H34NO2+), 338.26871 (C20H36NO3+); 7.9 min: 60.08157 (C3H10N+), 85.02895 (C4H5O2+), 144.10190 (C7H14NO2+), 157.04950 (C7H9O4+), 297.20569 (C17H29O4+); 8.4, 9.7 min - see growth medium, ES- table | 354.26508<br>(8.4 and 9.7<br>min peaks)    |
| GPE | 7.63 | 676.36749 | see growth medium, ES- table                                                                                                                                                                                                                 |                                            |
| GPE | 7.68 | 694.32031 | see growth medium, ES- table                                                                                                                                                                                                                 |                                            |
|     | 7.72 | 271.22681 | 171.13783 (C10H19O2+), 235.20549 (C16H27O+), 253.21591 (C16H29O2+)                                                                                                                                                                           |                                            |
| EA  | 7.74 | 340.24826 | 62.06082 (C2H8NO+), 237.18471 (C15H25O2+), 261.18457 (C17H25O2+), 279.19531 (C17H27O3+), 322.23746 (C19H32NO3+)                                                                                                                              | 374.21063                                  |
|     | 7.77 | 446.31137 |                                                                                                                                                                                                                                              |                                            |
| EA  | 7.78 | 332.27942 | 62.06082 (C2H8NO+), 149.05975 (C9H9O2+), 296.25830 (C18H34NO2+), 314.26886 (C18H36NO3+)                                                                                                                                                      | 366.24173,<br>376.27060                    |
|     | 7.78 | 711.38306 | 70.06581 (C4H8N+), 86.06056 (C4H8NO+), 112.03960 (C5H6NO2+), 308.25818 (C19H34NO2+)                                                                                                                                                          | 709.36856                                  |
|     | 7.81 | 805.37469 | see growth medium, ES- table                                                                                                                                                                                                                 |                                            |
|     | 7.88 | 671.35181 | see growth medium, ES- table                                                                                                                                                                                                                 |                                            |
|     | 7.94 | 616.30975 | see growth medium, ES- table                                                                                                                                                                                                                 |                                            |
|     | 7.95 | 790.36395 | 98.06042 (C5H8NO+), 100.07605 (C5H10NO+), 126.05504 (C6H8NO2+), 137.04576 (C5H5N4O+), 320.25818 (C20H34NO2+), 456.29672 (C25H38N5O3+), 610.29980 (C28H45N5PO8+), 628.31067 (C28H47N5PO9+)                                                    | 788.34945                                  |
|     | 8.03 | 382.29504 | see growth medium, ES- table                                                                                                                                                                                                                 |                                            |
|     | 8.07 | 725.39880 | 84.08131 (C5H10N+), 86.06054 (C4H8NO+), 308.25815 (C19H34NO2+), 480.27219 (C22H43NPO8+)                                                                                                                                                      | 723.38430                                  |
|     | 8.12 | 287.25809 | 233.22635 (C17H29+), 251.23686 (C17H31O+), 269.24741 (C17H33O2+)                                                                                                                                                                             |                                            |
|     | 8.17 | 380.27948 | 62.06082 (C2H8NO+), 283.20547 (C20H27O+), 301.21603 (C20H29O2+), 326.24811 (C22H32NO+), 344.25812 (C22H34NO2+), 362.26947 (C22H36NO3+)                                                                                                       | 378.26498,<br>414.24222                    |
|     | 8.22 | 448.32715 |                                                                                                                                                                                                                                              |                                            |
| EA  | 8.24 | 328.24817 | 62.06081 (C2H8NO+), 207.17445 (C14H23O+), 225.18495 (C14H25O2), 243.19543 (C14H27O3+), 249.18501 (C16H25O2+), 267.19543 (C16H27O3+), 310.23758 (C18H32NO3+)                                                                                  | 326.23367,<br>362.21100                    |
|     | 8.26 | 644.34088 | see growth medium, ES- table                                                                                                                                                                                                                 |                                            |
|     | 8.27 | 682.28717 |                                                                                                                                                                                                                                              |                                            |
|     | 8.27 | 688.30420 |                                                                                                                                                                                                                                              |                                            |
|     | 8.29 | 656.34082 | see growth medium, ES- table                                                                                                                                                                                                                 |                                            |
|     | 8.32 | 654.32550 | see growth medium, ES- table                                                                                                                                                                                                                 |                                            |
|     | 8.32 | 285.24231 | 231.21075 (C17H27+), 249.22121 (C17H29O+), 267.23169 (C17H31O2+)                                                                                                                                                                             |                                            |
|     | 8.39 | 308.25827 | 86.06059 (C4H8NO+)                                                                                                                                                                                                                           |                                            |
|     | 8.39 | 642.32513 | see growth medium, ES- table                                                                                                                                                                                                                 |                                            |
|     | 8.57 | 300.25327 | 8.6 min: 187.13293 (C10H19O3+), 223.20592 (C15H27O+), 229.29560 (C17H25+), 247.20572 (C17H27O+), 265.21622 (C17H29O2+); 10.1 min: see growth medium, ES- table                                                                               |                                            |
|     | 8.59 | 409.34219 | 84.08136 (C5H10N+), 326.26907 (C19H36NO3+)                                                                                                                                                                                                   |                                            |

|      |       |           |                                                                                                                                                                                                                                                      |                                       |
|------|-------|-----------|------------------------------------------------------------------------------------------------------------------------------------------------------------------------------------------------------------------------------------------------------|---------------------------------------|
|      | 8.62  | 630.32532 | 86.06063 (C4H8NO+), 296.25845 (C18H34O2N+)                                                                                                                                                                                                           | 628.31082                             |
|      | 8.64  | 809.39862 | see growth medium, ES- table                                                                                                                                                                                                                         |                                       |
|      | 8.68  | 785.39844 | 120.08100 (C8H10N+), 166.08617 (C9H12NO2+), 292.11777 (C15H18NO5+), 304.26337 (C20H34NO+), 310.12827 (C15H20NO6+), 482.14243 (C18H29NPO12+)                                                                                                          | 783.38394                             |
|      | 8.68  | 606.41333 | 1st peak: 84.08137 (C5H10N+), 396.38370 (C25H50NO2+); 2nd and 3rd peaks additionally have 70.06584 (C4H8N+)                                                                                                                                          |                                       |
|      | 8.82  | 281.24744 | 199.16922 (C12H23O2+), 245.22639 (C18H29+), 263.23706 (C18H31O+)                                                                                                                                                                                     |                                       |
|      | 8.90  | 309.24228 | 255.21057 (C19H27+), 273.22134 (C19H29O+), 291.23181 (C19H31O2+)                                                                                                                                                                                     |                                       |
|      | 8.92  | 680.34070 | see growth medium, ES- table                                                                                                                                                                                                                         |                                       |
|      | 9.06  | 482.28787 | 86.06061 (C4H8NO+), 98.06048 (C5H8NO+), 292.26331 (C19H34NO+), 310.27390 (C19H36NO2+)                                                                                                                                                                |                                       |
|      | 9.16  | 389.26617 | 371.25580 (C22H36O3Na+)                                                                                                                                                                                                                              |                                       |
|      | 9.17  | 620.42926 | 1st peak: 84.08136 (C5H10N+), 410.39923 (C26H52NO2+) in MS/MS; 2nd peak additionally has 70.06589 (C4H8N+)                                                                                                                                           |                                       |
|      | 9.27  | 526.44696 | 1st peak: 84.08138 (C5H10N+), 396.38397 (C25H50NO2+); 2nd peak additionally has 70.06586 (C4H8N+), 200.12827 (C10H18NO3+)                                                                                                                            |                                       |
| ascr | 9.31  | 518.40570 | 62.06084 (C2H8NO+), 352.32092 (C22H42NO2+), 370.33163 (C22H44NO3+), 388.34225 (C22H46NO4+)                                                                                                                                                           | 552.36788                             |
|      | 9.32  | 460.36319 | 277.25278 (C19H33O+), 295.26318 (C19H35O2+), 313.27374 (C19H37O3+)                                                                                                                                                                                   |                                       |
| EA   | 9.35  | 360.31064 | 62.06087 (C2H8NO+), 306.27951 (C20H36NO+), 324.29004 (C20H38NO2+), 342.30054 (C20H40NO3+)                                                                                                                                                            | 394.27282,<br>404.30197               |
| ascr | 9.45  | 540.46173 | 9.05 min: 56.05032 (C3H6N+), 84.08134 (C5H10N+), 214.14383 (C11H20NO3+), 410.39905 (C26H52NO2+); 9.30 min: 70.06588 (C4H8N+), 126.09155 (C7H12NO+), 200.12823 (C10H18NO3+), 410.39905 (C26H52NO2+)                                                   |                                       |
|      | 9.51  | 584.28577 | 124.03950 (C6H6NO2+), 215.17972 (C16H23+), 268.08145 (C12H14NO6+)                                                                                                                                                                                    | 618.24795,<br>628.27679               |
|      | 9.54  | 227.20056 |                                                                                                                                                                                                                                                      |                                       |
|      | 9.56  | 307.22684 | 271.20648 (C19H27O+), 289.21625 (C19H29O2+)                                                                                                                                                                                                          |                                       |
| ascr | 9.62  | 516.38965 | 62.06082 (C2H8NO+), 86.06058 (C4H8NO+), *325.27368 (C20H37O3+), 350.30515 (C22H40NO2+), 368.31589 (C22H42NO3+), 386.32648 (C22H44NO4+)                                                                                                               | 514.37515,<br>550.35229,<br>560.38098 |
| ascr | 9.89  | 532.42084 | see growth medium, ES- table                                                                                                                                                                                                                         |                                       |
| ascr | 10.16 | 530.40533 | see growth medium, ES- table                                                                                                                                                                                                                         |                                       |
| ascr | 10.20 | 488.39459 | 305.28369 (C21H37O+), 323.29449 (C21H39O2+), 341.30518 (C21H41O3+)                                                                                                                                                                                   |                                       |
|      | 10.44 | 568.41901 |                                                                                                                                                                                                                                                      | 580.39929                             |
| ascr | 10.49 | 544.42126 | see growth medium, ES- table                                                                                                                                                                                                                         |                                       |
| EA   | 10.53 | 398.32681 | 62.06086 (C2H8NO+), 86.06065 (C4H8NO+), 277.25314 (C19H33O+), 295.26285 (C19H35O2+), 313.27380 (C19H37O3+), 337.27383 (C21H37O3+), 380.31607 (C23H42NO3+)                                                                                            | 396.31231,<br>432.28900               |
| EA   | 10.69 | 326.26892 | see growth medium, ES- table                                                                                                                                                                                                                         |                                       |
|      | 10.70 | 337.30994 | 241.21593 (C15H29O2+), 255.23206 (C16H31O2+)                                                                                                                                                                                                         |                                       |
| ascr | 10.71 | 502.41043 | 319.29962 (C22H39O+), 337.31009 (C22H41O2+), 355.32086 (C22H43O3+)                                                                                                                                                                                   |                                       |
|      | 10.78 | 726.45581 | see growth medium, ES- table                                                                                                                                                                                                                         |                                       |
| ascr | 10.79 | 560.45282 | 62.06082 (C2H8NO+), 376.35785 (C25H46NO+), 394.36826 (C25H48NO2+), 412.37866 (C25H50NO3+), 430.38922 (C25H52NO4+)                                                                                                                                    | 594.41500                             |
|      | 10.83 | 440.37372 | 11.9 min: 62.06082 (C2H8NO+), 325.27362 (C20H37O3+), 341.30457 (C21H41O3+), 379.32086 (C24H43O3+), 422.36288 (C26H48NO3+); 12.2 min: 62.06082 (C2H8NO+), 325.27362 (C20H37O3+), 355.32077 (C22H43O3+), 379.32089 (C24H43O3+), 422.36288 (C26H48NO3+) | 474.33590                             |
|      | 10.85 | 271.26315 | 235.24219 (C17H31+), 253.25266 (C17H33O+)                                                                                                                                                                                                            |                                       |
|      | 10.86 | 314.26892 | see growth medium, ES- table                                                                                                                                                                                                                         |                                       |
|      | 10.87 | 356.31577 |                                                                                                                                                                                                                                                      |                                       |
|      | 10.97 | 364.28455 |                                                                                                                                                                                                                                                      | 362.27005,<br>398.24695               |
|      | 10.98 | 321.16650 | 57.07075 (C4H9+), 72.04508 (C3H6NO+), 100.07610 (C5H10NO+), 156.13837 (C9H18NO+)                                                                                                                                                                     |                                       |
|      | 11.05 | 410.36295 | see comments                                                                                                                                                                                                                                         |                                       |
|      | 11.05 | 428.37366 | see comments                                                                                                                                                                                                                                         |                                       |
| ascr | 11.05 | 558.43689 | 62.06082 (C2H8NO+), 86.06058 (C4H8NO+), 392.35233 (C25H46NO2+), 410.36292 (C25H48NO3+), 428.37360 (C25H50NO4+)                                                                                                                                       | 556.42239,<br>592.39948,<br>602.42841 |
| EA   | 11.07 | 412.34229 | 62.06082 (C2H8NO+), 86.06058 (C4H8NO+), 291.26816 (C20H35O+), 309.27890 (C20H37O2+), 327.28937 (C20H39O3+), 351.28943 (C22H39O3), 394.33188 (C24H44NO3+)                                                                                             | 410.32779,<br>446.30466               |
| EA   | 11.08 | 386.36292 | 62.06084 (C2H8NO+), 368.35291 (C23H46NO2+)                                                                                                                                                                                                           |                                       |
|      | 11.18 | 837.56104 | 84.08137 (C5H10N+), 124.99995 (C2H6PO4+), 184.07330 (C5H15NPO4+), 448.41574 (C29H54NO2+), 452.40942 (C28H54NO3+), 466.42560 (C29H56NO3+)                                                                                                             |                                       |
|      | 11.19 | 355.32080 | 241.21635 (C15H29O2+), 255.23204 (C16H31O2+), 319.29941 (C22H39O+), 337.31000 (C22H41O2+)                                                                                                                                                            |                                       |
|      | 11.21 | 267.26816 |                                                                                                                                                                                                                                                      |                                       |
| EA   | 11.26 | 456.36841 | 62.06082 (C2H8NO+), 100.07612 (C5H10NO+), 282.27914 (C18H36NO+), 420.34659                                                                                                                                                                           | 454.35391                             |

|      |       |           |                                                                                                                                                                                                                                                                                                                                                                |                         |
|------|-------|-----------|----------------------------------------------------------------------------------------------------------------------------------------------------------------------------------------------------------------------------------------------------------------------------------------------------------------------------------------------------------------|-------------------------|
|      |       |           | (C26H46NON+), 438.35788 (C26H48NO4+)                                                                                                                                                                                                                                                                                                                           |                         |
|      | 11.29 | 454.35321 |                                                                                                                                                                                                                                                                                                                                                                | 452.33871               |
| ascr | 11.30 | 574.46887 | 62.06082 (C2H8NO+), 390.37314 (C26H48NO+), 408.38394 (C26H50NO2+), 426.39426 (C26H52NO3+), 444.40503 (C26H54NO4+)                                                                                                                                                                                                                                              | 608.43105,<br>618.45966 |
|      | 11.30 | 297.27896 |                                                                                                                                                                                                                                                                                                                                                                |                         |
|      | 11.31 | 516.42615 |                                                                                                                                                                                                                                                                                                                                                                |                         |
|      | 11.33 | 572.45239 | see growth medium, ES- table                                                                                                                                                                                                                                                                                                                                   |                         |
| EA   | 11.36 | 426.35803 | all peaks have 62.06082 (C2H8NO+); additionally, 11.3 min peak has: 100.07618 (C5H10NO+), 291.26831 (C20H35O+), 309.27893 (C20H37O2+), 327.28998 (C20H39O3+), 365.30518 (C23H41O3+), 408.34741 (C25H46NO3+); 11.55 and 11.65 min peaks have: 305.28387 (C21H37O+), 323.29449 (C21H39O2+), 341.30521 (C21H41O3+), 365.30518 (C23H41O3+), 408.34741 (C25H46NO3+) | 460.32021               |
|      | 11.43 | 432.36838 | 249.25772 (C18H33+), 267.26819 (C18H35O+); 2nd peak additionally has 285.27869 (C18H37O2+)                                                                                                                                                                                                                                                                     |                         |
|      | 11.45 | 528.42603 | 10.2 min: 85.02900 (C4H5O2+); 11.5 min: 325.27411 (C20H37O3+), 380.35272 (C24H46NO2+), 398.36301 (C24H48NO3+);                                                                                                                                                                                                                                                 |                         |
|      | 11.75 | 383.35223 | see comments                                                                                                                                                                                                                                                                                                                                                   |                         |
| ascr | 11.75 | 692.49512 | see growth medium, ES- table                                                                                                                                                                                                                                                                                                                                   |                         |
|      | 11.76 | 446.38440 | 263.27316 (C19H35+), 281.28372 (C19H37O+); 2nd peak additionally has 299.29459 (C19H39O2+)                                                                                                                                                                                                                                                                     |                         |
|      | 11.78 | 384.34738 | 10.8 min: 62.06086 (C2H8NO+), 366.33691 (C23H44NO2+)                                                                                                                                                                                                                                                                                                           |                         |
|      | 11.85 | 354.30032 | see comments                                                                                                                                                                                                                                                                                                                                                   |                         |
| ascr | 11.95 | 588.48413 | 62.06083 (C2H8NO+), 422.39948 (C27H52NO2+), 440.41019 (C27H54NO3+), 458.42047 (C27H56NO4+)                                                                                                                                                                                                                                                                     | 622.44631               |
|      | 12.01 | 529.44714 | 345.35187 (C25H45+), 363.36212 (C25H47O+)                                                                                                                                                                                                                                                                                                                      |                         |
|      | 12.07 | 342.30042 | 62.06085 (C2H8NO+), 86.06064 (C4H8NO+), 324.28979 (C20H38NO2+)                                                                                                                                                                                                                                                                                                 |                         |
| ascr | 12.14 | 586.46857 | 62.06085 (C2H8NO+), 86.06064 (C4H8NO+), 420.38361 (C27H50NO2+), 438.39429 (C27H52NO3+)                                                                                                                                                                                                                                                                         | 584.45407,<br>620.43073 |
|      | 12.18 | 544.45776 | 361.34659 (C25H45O+), 379.35718 (C25H47O2+)                                                                                                                                                                                                                                                                                                                    |                         |
|      | 12.29 | 460.40005 | 277.28925 (C20H37+), 295.29974 (C20H39O+); 2nd peak additionally has 313.31030 (C20H41O2+)                                                                                                                                                                                                                                                                     |                         |
| ascr | 12.36 | 600.48395 | see growth medium, ES- table                                                                                                                                                                                                                                                                                                                                   |                         |
|      | 12.40 | 694.51050 | 85.02903 (C4H5O2+), 95.04966 (C6H7O+), 97.02892 (C5H5O2+), 113.06007 (C6H9O2+), 127.03916 (C6H7O3+), 131.07059 (C6H11O3+), 145.04971 (C6H9O4+), 349.34668 (C24H45O+), 367.35727 (C24H47O2+)                                                                                                                                                                    | 675.47000               |
| ascr | 12.56 | 556.45764 | 347.33090 (C24H43O+), 408.38376 (C26H50NO2+), 426.39459 (C26H52NO3+)                                                                                                                                                                                                                                                                                           | 590.41982               |
|      | 12.57 | 393.37265 | 319.33627 (C23H43+), 347.36789 (C25H47+), 357.35144 (C26H45+), 375.36246 (C26H47O+)                                                                                                                                                                                                                                                                            |                         |
| EA   | 12.62 | 454.38950 | 62.06085 (C2H8NO+), 282.27823 (C18H36NO+), 313.27383 (C19H37O3+), 369.33578 (C23H45O3+), 393.33575 (C25H45O3+), 436.37976 (C27H50NO3+)                                                                                                                                                                                                                         | 488.35168               |
|      | 12.79 | 474.41592 | 291.30457 (C21H39+), 309.31509 (C21H41O+); 2nd peak additionally has 327.32602 (C21H43O2+)                                                                                                                                                                                                                                                                     | 491.35210               |
|      | 12.80 | 468.40509 | 62.06083 (C2H8NO+), 100.07610 (C5H10NO+), 212.23735 (C14H30N+), 407.35123 (C26H47O3+), 450.39441 (C28H52NO3+)                                                                                                                                                                                                                                                  | 502.36727               |
|      | 13.13 | 638.49823 |                                                                                                                                                                                                                                                                                                                                                                |                         |
| ascr | 13.17 | 614.50000 | 62.06083 (C2H8NO+), 448.41498 (C29H54NO2+), 466.42572 (C29H56NO3+)                                                                                                                                                                                                                                                                                             | 648.46218               |
|      | 13.25 | 488.43124 | 305.32031 (C22H41+), 323.33087 (C22H43O+); 2nd (small) peak additionally has 341.34128 (C22H45O2+)                                                                                                                                                                                                                                                             | 505.36742               |
|      | 13.35 | 604.47888 | 319.33673 (C23H43+), 343.33636 (C25H43+), 361.34680 (C25H45O+), 379.35757 (C25H47O2+), 439.37784 (C27H51O4+)                                                                                                                                                                                                                                                   |                         |
|      | 13.37 | 513.41565 | 291.30432 (C21H39+), 319.33646 (C23H43+), 329.32016 (C24H41+), 347.33087 (C24H43O+), 365.34152 (C24H45O2+)                                                                                                                                                                                                                                                     | 511.40115               |
| ascr | 13.41 | 584.48883 | 375.36240 (C26H47O-), 436.41498 (C28H54NO2+), 454.42575 (C28H56NO3+)                                                                                                                                                                                                                                                                                           | 618.45101               |
|      | 13.48 | 367.35699 | 331.33612 (C23H43+), 349.34692 (C24H45O+)                                                                                                                                                                                                                                                                                                                      |                         |
|      | 13.71 | 502.44693 | 319.33594 (C23H43+), 337.34634 (C23H45O+); 2nd (smaller) peak additionally has 355.35687 (C23H47O2+)                                                                                                                                                                                                                                                           |                         |
|      | 13.80 | 451.37576 |                                                                                                                                                                                                                                                                                                                                                                |                         |
| ascr | 14.08 | 573.40991 | 443.34793 (C24H47N2O5+), 499.37332 (C27H51N2O6+)                                                                                                                                                                                                                                                                                                               |                         |
|      | 14.18 | 516.46240 | 333.35147 (C24H45+), 351.36206 (C24H47O+)                                                                                                                                                                                                                                                                                                                      | 533.39858               |
|      | 14.41 | 411.38327 | 319.33615 (C23H43+), 347.36719 (C25H47+), 357.35162 (C26H45+), 375.36224 (C26H47O+)                                                                                                                                                                                                                                                                            |                         |
|      | 14.74 | 530.47839 | 347.36725 (C25H47+), 365.37784 (C25H49O+)                                                                                                                                                                                                                                                                                                                      | 547.41457               |

**Table S10. Differential metabolites from *P. pacificus* J2 medium, ES- mode, that are decreased or absent in RS2770 *Ppa-daf-22* medium compared to RS2333. Peaks that are also differential in growth medium are shown in red. Peaks that are also in growth medium table (ES-) are shown in bold red. Entries that have a corresponding peak in the ES+ table are shaded grey.**

| class | rt (min) | m/z (ES-)        | MS/MS (ES-)                                                                                                                                                                                                                                                                                                                                  | m/z (ES+)               | MS/MS (ES+)                                                                                                                                                                                                                                                                                                                                                                                                                   |
|-------|----------|------------------|----------------------------------------------------------------------------------------------------------------------------------------------------------------------------------------------------------------------------------------------------------------------------------------------------------------------------------------------|-------------------------|-------------------------------------------------------------------------------------------------------------------------------------------------------------------------------------------------------------------------------------------------------------------------------------------------------------------------------------------------------------------------------------------------------------------------------|
| S     | 1.88     | <b>211.02846</b> | 85.06466 (C5H9O-), 96.95895 (HSO4-), 113.05977 (C6H9O2-), 131.07054 (C6H11O3-)                                                                                                                                                                                                                                                               |                         |                                                                                                                                                                                                                                                                                                                                                                                                                               |
| ascr  | 3.25     | 455.17737        | 59.01254 (C2H3O2-), 71.01258 (C3H3O2-), 73.02823 (C3H5O2-), 85.02842 (C4H5O2-), 89.02329 (C3H5O3-), 95.01269 (C5H3O2-), 99.04408 (C5H7O2-), 101.02346 (C4H5O3-), 111.04436 (C6H7O2-), 113.02366 (C5H5O3-), 119.03429 (C4H7O4-), 123.04444 (C7H7O2-), 147.06580 (C6H11O4-), 161.04538 (C6H9O5-), 247.11864 (C11H19O6-), 271.11862 (C13H19O6-) | 433.16763               | 141.05225 (C5H10O3Na+), 153.05228 (C6H10O3Na+), 271.11508 (C11H20O6Na+)                                                                                                                                                                                                                                                                                                                                                       |
| S     | 3.37     | <b>225.04401</b> | 96.95898 (HSO4-), 99.08042 (C6H11O-), 145.08650 (C7H13O3-)                                                                                                                                                                                                                                                                                   |                         |                                                                                                                                                                                                                                                                                                                                                                                                                               |
| S     | 3.39     | 304.08612        | 63.96114 (SO2-), 74.00572 (C2H4NS-), 84.04427 (C4H6NO-), 113.04217 (C6H9S-), 116.01666 (C4H6NSO-), 128.03465 (C5H6NO3-), 175.04324 (C7H11SO3-), 178.01779 (C5H8NSO4-)                                                                                                                                                                        | 306.10083               | 84.04501 (C4H6NO+), 85.06543 (C5H9O+), 88.03989 (C3H6NO2+), 99.02674 (C5H7S+), 112.03970 (C5H6NO2+), 113.04222 (C6H9S+), 130.05005 (C5H8NO3+), 159.04761 (C7H11SO2+), 264.09000 (C10H18NSO5+)                                                                                                                                                                                                                                 |
| S     | 3.44     | 211.06465        | 79.95608 (SO3-), 96.95898 (HSO4-)                                                                                                                                                                                                                                                                                                            |                         |                                                                                                                                                                                                                                                                                                                                                                                                                               |
| ascr  | 3.59     | 469.19308        | 73.02822 (C3H5O2-), 113.05982 (C6H9O2-), 261.13406 (C12H21O6-)                                                                                                                                                                                                                                                                               | 442.22808,<br>447.18399 |                                                                                                                                                                                                                                                                                                                                                                                                                               |
| S     | 3.61     | 401.11264        | 96.95898 (HSO4-), 159.10222 (C7H15O3-), 239.05933 (C8H15SO6-)                                                                                                                                                                                                                                                                                |                         |                                                                                                                                                                                                                                                                                                                                                                                                                               |
| ascr  | 3.80     | <b>567.19379</b> | 73.02823 (C3H5O2-), 85.02831 (C4H5O2-), 113.02360 (C5H5O3-), 115.00289 (C4H3O4-), 157.01384 (C6H5O6-), 175.02470 (C6H7O6-), 247.11874 (C11H19O6-), 405.14008 (C17H25O11-)                                                                                                                                                                    | 586.23486               | 95.01321 (C5H3O2+), 101.06010 (C5H9O2+), 113.02367 (C5H5O3+), 129.01836 (C5H5O4+), 141.01825 (C6H5O4), 159.02867 (C6H7O5+), 177.03935 (C6H9O6+), 259.08121 (C11H15O7+), 277.09183 (C11H17O8+)                                                                                                                                                                                                                                 |
| ascr  | 4.03     | <b>483.20877</b> | 73.02829 (C3H5O2-), 127.07575 (C7H11O2-), 275.14987 (C13H23O6-)                                                                                                                                                                                                                                                                              | 456.24377,<br>461.19968 |                                                                                                                                                                                                                                                                                                                                                                                                                               |
|       | 4.04     | <b>305.16074</b> |                                                                                                                                                                                                                                                                                                                                              |                         |                                                                                                                                                                                                                                                                                                                                                                                                                               |
| S     | 4.06     | <b>239.05952</b> | 96.95902 (HSO4-), 113.09630 (C7H13O-), 159.10231 (C8H15O3-)                                                                                                                                                                                                                                                                                  |                         |                                                                                                                                                                                                                                                                                                                                                                                                                               |
| S     | 4.17     | 225.08032        | 79.95609 (SO3-), 96.95900 (HSO4-)                                                                                                                                                                                                                                                                                                            |                         |                                                                                                                                                                                                                                                                                                                                                                                                                               |
| ascr  | 4.88     | 971.35278        | 73.02822 (C3H5O2-), 89.02324 (C3H5O3-), 98.02367 (C4H4NO2-), 108.04457 (C6H6NO-), 134.02419 (C7H4NO2-), 152.03485 (C7H6NO3-), 194.04584 (C9H8NO4-), 309.12521 (C18H17N2O3-), 335.10327 (C19H15N2O4-), 583.22888 (C30H35N2O10-), 763.29364 (C36H47N2O16-)                                                                                     | 927.36133               | 91.05466 (C7H7+), *103.05466 (C8H7+), *120.08099 (C8H10N+), 136.03931 (C7H6NO2+), *146.06007 (C9H8NO+), *156.08089 (C11H10N+), *174.09137 (C11H12NO+), *184.07573 (C12H10NO+), 190.04980 (C10H8NO3+), *202.08630 (C12H12NO2+), 218.04488 (C11H8NO4+), *220.09691 (C12H14NO3+), 236.05511 (C11H10NO5+), 320.14908 (C17H22NO5+), 355.12823 (C19H19N2O5+), 398.10840 (C17H20NO10+), 517.18182 (C25H29N2O10+); (* pasc fragments) |
|       | 5.00     | 716.22363        | 78.95781 (PO3-), 96.96853 (H2PO4-), 202.08760 (C12H12NO2-), 581.19043 (C26H34N2PO11-)                                                                                                                                                                                                                                                        | 718.23773               | 105.07030 (C8H9+), 136.03941 (C7H6NO2+), 204.10208 (C12H14NO2+), 222.11256 (C12H16NO3+), 244.06053 (C13H10NO4+), 262.07135 (C13H12NO5+), 264.12283 (C14H18NO4+), 330.13318 (C18H20NO5+), 483.17391 (C25H27N2O8+)                                                                                                                                                                                                              |
| ascr  | 5.15     | <b>560.19080</b> | 78.95779 (PO3-), 96.96849 (H2PO4-), 131.07065 (C6H11O3-), 209.02202 (C6H10PO6-), 341.10123 (C12H22PO9-), 460.17368 (C20H31NPO9-)                                                                                                                                                                                                             | 562.20532               | 101.02374 (C4H5O3+), 103.05464 (C8H7+), 120.08102 (C8H10N+), 146.06009 (C9H8NO+), 156.08087 (C11H10N+), 157.06494 (C11H9O+), 174.09135 (C11H12NO+), 184.07565 (C12H10NO+), 202.08633 (C12H12NO2+), 220.09686 (C12H14NO3+), 238.10753 (C12H16NO4+); all these fragments are present in pasc#9 and pasc#12                                                                                                                      |

|      |      |           |                                                                                                                                                                                                                                                                                                                                                                                                                                                                                                                      |           |                                                                                                                                                                                                                                                                 |
|------|------|-----------|----------------------------------------------------------------------------------------------------------------------------------------------------------------------------------------------------------------------------------------------------------------------------------------------------------------------------------------------------------------------------------------------------------------------------------------------------------------------------------------------------------------------|-----------|-----------------------------------------------------------------------------------------------------------------------------------------------------------------------------------------------------------------------------------------------------------------|
| ascr | 5.15 | 674.26752 | 59.01256 (C2H3O2-), 71.01263 (C3H3O2-), 73.02829 (C3H5O2-), 85.02847 (C4H5O2-), 89.02338 (C3H5O3-), 98.02378 (C4H4NO2-), 101.02347 (C4H5O3-), 113.02364 (C5H5O3-), 119.03419 (C4H7O4-), 143.03445 (C6H7O4-), 161.04530 (C6H9O5-), 179.05602 (C6H11O6-), 218.08229 (C12H12NO3-), 247.11867 (C11H19O6-), 448.19705 (C23H30NO8-), 466.20795 (C23H32NO9-)                                                                                                                                                                | 647.30286 | all fragments present in 562.20532 at 5.15 min plus 364.13898 (C18H20NO7+), 382.14948 (C18H24NO8+), 482.20206 (C23H32NO10+)                                                                                                                                     |
| S    | 5.24 | 267.09100 | 96.95888 (HSO4-), 141.12782 (C9H17O-), 187.13380 (C10H19O3-)                                                                                                                                                                                                                                                                                                                                                                                                                                                         |           |                                                                                                                                                                                                                                                                 |
|      | 5.24 | 292.11942 | 72.00786 (C2H2NO2-), 83.04914 (C5H7O-), 91.05427 (C7H7-), 100.07585 (C5H10NO-), 118.06535 (C8H8N-), 147.04471 (C9H7O2-), 164.07141 (C9H10NO2-), 230.11893 (C14H16NO2-), 248.12886 (C14H18NO3-), 274.10852 (C15H16NO4-)                                                                                                                                                                                                                                                                                               |           |                                                                                                                                                                                                                                                                 |
|      | 5.27 | 471.18762 | 163.03978 (C9H7O3-), 165.01894 (C8H5O4-), 165.05537 (C9H9O3-), 166.02679 (C8H6O4-, rad), 167.03470 (C8H7O4-), 179.03488 (C9H7O4-), 180.04269 (C9H8O4-, rad), 181.05057 (C9H9O4-), 182.05832 (C9H10O4-, rad), 218.09476 (C13H14O3-, rad), 233.11826 (C14H17O3-), 234.08966 (C13H14O4-, rad), 235.09749 (C13H15O4-), 249.11313 (C14H17O4-), 250.12096 (C14H18O4-, rad), 264.13669 (C15H20O4-, rad), 265.14444 (C15H21O4-), 309.13449 (C16H21O6-), *427.19702 (C21H31O9-), 471.18695 (C22H31O11-); (* only in 1st peak) | 490.22897 | 151.07538 (C9H11O2+), 153.05464 (C8H9O3+), 154.06242 (C8H10O3+, rad), 169.08591 (C9H13O3+), 182.05739 (C9H10O4+, rad), 185.08089 (C9H13O4+), 197.08086 (C10H13O4+, major), 293.13815 (C16H21O5+)                                                                |
| S    | 5.35 | 253.11151 | 79.95612 (SO3-), 96.95901 (HSO4-)                                                                                                                                                                                                                                                                                                                                                                                                                                                                                    |           |                                                                                                                                                                                                                                                                 |
| ascr | 5.38 | 688.28271 | 59.01256 (C2H3O2-), 71.01258 (C3H3O2-), 73.02824 (C3H5O2-), 85.02837 (C4H5O2-), 89.02328 (C3H5O3-), 98.02372 (C4H4NO2-), 101.02341 (C4H5O3-), 113.02357 (C5H5O3-), 119.03416 (C4H7O4-), 143.03459 (C6H7O4-), 161.04526 (C6H9O5-), 179.05591 (C6H11O6-), 218.08235 (C12H12NO3-), 261.13385 (C12H21O6-), 462.21432 (C24H32NO8-), 480.22482 (C24H34NO9-)                                                                                                                                                                | 661.31818 | same fragments as 647.30286 at 5.15 min plus 364.13910 (C18H22NO7+), 382.14957 (C18H24NO8+)                                                                                                                                                                     |
|      | 5.40 | 215.12897 | 85.06469 (C5H9O-), 99.04407 (C5H7O2-), 115.07558 (C6H11O2-), 153.12808 (C10H17O-), 169.12312 (C10H17O2-), 197.11823 (C11H17O3-)                                                                                                                                                                                                                                                                                                                                                                                      |           |                                                                                                                                                                                                                                                                 |
| ascr | 5.41 | 763.29425 | 73.02823 (C3H5O2-), 98.02361 (C4H4NO2-), 108.04444 (C6H6NO-), 134.02399 (C7H4NO2-), 144.04491 (C9H6NO-), 152.03484 (C7H6NO3-), 188.03514 (C10H6NO3-), 189.06683 (C10H9N2O2-), 199.05116 (C11H7N2O2-), 201.06683 (C11H9N2O2-), 203.08258 (C11H11N2O2-), 215.04610 (C11H7N2O3-), 216.03011 (C11H6NO4-), 229.06178 (C12H9N2O3-), 291.11392 (C18H15N2O2-), 309.12399 (C18H17N2O3-), 317.09332 (C19H13N2O3-), 335.10379 (C19H15N2O4-, major), 353.11441 (C19H17N2O5-), 583.22955 (C30H35N2O10-), 601.24017 (C30H37N2O11-) | 765.30865 | pasc fragments (see 927.36133 at 4.88 min), 91.05470 (C7H7+), 190.04985 (C10H8NO3+), 218.04486 (C11H8NO4+), 236.05525 (C11H10NO5+), 320.14920 (C17H22NO5+), 355.12872 (C19H19N2O5+), 373.13925 (C19H21N2O6+), 473.19183 (C24H29N2O8+), 517.18237 (C25H29N2O10+) |
| ascr | 5.49 | 528.16376 | 78.95781 (PO3-), 96.96856 (H2PO4-)                                                                                                                                                                                                                                                                                                                                                                                                                                                                                   |           |                                                                                                                                                                                                                                                                 |
|      | 5.53 | 273.17105 | 2nd peak: 59.01262 (C2H3O2-), 115.03915 (C5H7O3-), 139.11220 (C9H15O-); 3rd peak: 59.01262 (C2H3O2-), 97.06483 (C6H9O-), 111.08069 (C7H11O-), 113.05997 (C6H9O2-), 115.03934 (C5H7O3-), 127.07571 (C7H11O2-), 129.09140 (C7H13O2-)                                                                                                                                                                                                                                                                                   |           |                                                                                                                                                                                                                                                                 |
| ascr | 5.71 | 542.18005 | 78.95781 (PO3-), 96.96856 (H2PO4-), 209.02205 (C6H10PO6-), 323.08972 (C12H20PO8-)                                                                                                                                                                                                                                                                                                                                                                                                                                    | 544.19452 | pasc fragments (see 927.36133 at 4.88 min), 211.03664 (C6H12PO6+)                                                                                                                                                                                               |
| S    | 5.73 | 281.10651 | 96.95601 (HSO4-), 155.14384 (C10H19O-), 201.14964 (C11H21O3-)                                                                                                                                                                                                                                                                                                                                                                                                                                                        |           |                                                                                                                                                                                                                                                                 |
| ascr | 5.75 | 793.30481 | 73.02821 (C3H5O2-), 89.02323 (C3H5O3-), 92.04944 (C6H6N-), 136.03975 (C7H6NO2-), 173.07202 (C10H9N2O-), 179.05621 (C6H11O6-), 185.07213 (C11H9N2O-), 187.08789                                                                                                                                                                                                                                                                                                                                                       | 749.31293 | pasc fragments (see 927.36133 at 4.88 min), 91.05473 (C7H7+), 320.14941 (C17H22NO5+), 339.13391 (C19H19N2O4+), 357.14490                                                                                                                                        |

|      |       |           |                                                                                                                                                                                                                                                                                                                                                                          |           |                                                                                                                                                                                                              |
|------|-------|-----------|--------------------------------------------------------------------------------------------------------------------------------------------------------------------------------------------------------------------------------------------------------------------------------------------------------------------------------------------------------------------------|-----------|--------------------------------------------------------------------------------------------------------------------------------------------------------------------------------------------------------------|
|      |       |           | (C11H11N2O-), 199.05144 (C11H7N2O2-), 247.11839 (C11H19O6-), 275.11951 (C18H15N2O-), 293.13028 (C18H17N2O2-), 319.10901 (C19H15N2O3-), 337.11917 (C19H17N2O4-), 567.23480 (C30H35N2O9-), 585.24561 (C30H37N2O10-)                                                                                                                                                        |           | (C19H21N2O5+), 483.17523 (C25H27N2O8+), 501.18668 (C26H29N2O9+)                                                                                                                                              |
| ascr | 5.93  | 927.31812 | 73.02818 (C3H5O2-), 78.95779 (PO3-), 96.96849 (H2PO4-), 108.04451 (C6H6NO-), 148.96407 (C3H2PO5-), 152.03487 (C7H6NO3-), 223.00121 (C6H8PO7-), 241.01192 (C6H10PO8-), 325.06943 (C11H18PO9-), 601.24054 (C30H37N2O11-)                                                                                                                                                   |           |                                                                                                                                                                                                              |
| ascr | 5.99  | 556.19574 | 78.95779 (PO3-), 96.96849 (H2PO4-)                                                                                                                                                                                                                                                                                                                                       |           |                                                                                                                                                                                                              |
|      | 6.15  | 301.20248 | 97.06478 (C6H9O-), 99.08043 (C6H11O-), 125.05999 (C7H9O2-), 127.11205 (C8H15O-), 139.11221 (C9H15O-), 143.07082 (C7H11O3-), 157.12311 (C9H17O2-), 201.11310 (C10H17O4-)                                                                                                                                                                                                  |           |                                                                                                                                                                                                              |
| ascr | 6.16  | 601.24109 | 66.03374 (C4H4N-), 67.01775 (C4H3O-), 73.02831 (C3H5O2-), 98.02370 (C4H4NO2-), 108.04457 (C6H6NO-), 134.02412 (C7H4NO2-), 152.03491 (C7H6NO3-), 190.05084 (C10H8NO3-), 203.08264 (C11H11N2O2-), 218.08212 (C12H12NO3-), 234.04044 (C11H8NO5-), 247.11861 (C11H19O6-), 309.12439 (C18H17N2O3-), 335.10370 (C19H15N2O4-), 353.11423 (C19H17N2O5-), 371.12540 (C19H19N2O6-) | 603.24109 | pasc fragments (see 927.36133 at 4.88 min), 91.05471 (C7H7+), 190.04990 (C10H8NO3+), 218.04485 (C11H8NO4+), 236.05533 (C11H10NO5+), 320.14920 (C17H22NO5+), 355.12878 (C19H19N2O5+), 373.13907 (C19H21N2O6+) |
| S    | 6.37  | 307.12247 | 96.95601 (HSO4-)                                                                                                                                                                                                                                                                                                                                                         |           |                                                                                                                                                                                                              |
| S    | 6.50  | 337.13315 | 96.95601 (HSO4-)                                                                                                                                                                                                                                                                                                                                                         |           |                                                                                                                                                                                                              |
| S    | 7.09  | 363.14868 | 96.95601 (HSO4-)                                                                                                                                                                                                                                                                                                                                                         |           |                                                                                                                                                                                                              |
|      | 10.53 | 504.31027 | 78.95785 (PO3-), 140.01131 (C2H7NPO4-), 196.03786 (C5H11NPO5-), 214.04865 (C5H13NPO6-), 307.26431 (C20H35O2-, major)                                                                                                                                                                                                                                                     | 506.32443 | 365.30508 (C23H41O3+)                                                                                                                                                                                        |
|      | 11.25 | 433.23657 | 78.95785 (PO3-), 96.96835 (H2PO4-), 152.99522 (C3H6PO5-)                                                                                                                                                                                                                                                                                                                 |           |                                                                                                                                                                                                              |
|      | 14.15 | 423.20795 | 87.00773 (C3H3O3-), 279.26917 (C19H35O-), 307.26428 (C20H35O2-), 323.25858 (C20H35O3-), 351.25403 (C21H35O4-), 387.23059 (C21H36O4Cl-)                                                                                                                                                                                                                                   |           |                                                                                                                                                                                                              |

**Table S11. Differential metabolites from *P. pacificus* growth medium, ES- mode, that are decreased or absent in RS2770 *Ppa-daf-22* medium compared to RS2333. Peaks that are present but not differential in J2 medium are shown in blue. Peaks that are also differential in J2 medium are shown in red. Peaks that are also in J2 medium table (ES-) are shown in bold red. Entries that have a corresponding peak in the ES+ table are shaded grey.**

| class | smid-db | rt (min) | m/z (ES-)        | MS/MS (ES-)                                                                                                                                                                                                                                                                                                                             | m/z (ES+) | MS/MS (ES+)                                                                                                                                                                                                                                      |
|-------|---------|----------|------------------|-----------------------------------------------------------------------------------------------------------------------------------------------------------------------------------------------------------------------------------------------------------------------------------------------------------------------------------------|-----------|--------------------------------------------------------------------------------------------------------------------------------------------------------------------------------------------------------------------------------------------------|
| S     |         | 1.12     | 227.05963        |                                                                                                                                                                                                                                                                                                                                         |           |                                                                                                                                                                                                                                                  |
| S     |         | 1.96     | <b>211.02846</b> | see J2, ES- table                                                                                                                                                                                                                                                                                                                       |           |                                                                                                                                                                                                                                                  |
|       |         | 1.99     | <b>229.11926</b> | 58.02862 (C2H4NO-), 126.09171 (C7H12NO-), 128.07072 (C6H10NO2-), 141.10266 (C7H13N2O-), 143.11853 (C7H15N2O-), 145.09776 (C6H13N2O2-), 187.10869 (C8H15N2O3-)                                                                                                                                                                           | 231.13370 | 84.08131 (C5H10N+), 126.09143 (C7H12NO+), 185.12837 (C9H17N2O2+), 189.12326 (C8H17N2O3+), 213.12332 (C10H17N2O3+)                                                                                                                                |
|       |         | 2.02     | 970.24817        | 78.95784 (PO3-), 96.96857 (H2PO4-), 122.98451 (C2H4PO4-), 166.05092 (C8H8NO3-), 168.04283 (C4H11NPO4-), 569.13800 (C20H30N2PO15-), 640.21277 (C24H39N3PO15-), 693.13330 (C29H30N2PO16-), 754.24323 (C29H45N3PO18-), 807.16406 (C34H36N2PO19-), 813.19910 (C37H37N2O19-), 858.25873 (C39H44N3O19-), 872.26892, 911.17596 (C37H40N2PO23-) | 972.26267 | 98.98441 (H4PO4+), 104.10736 (C5H14NO+), 124.99995 (C2H6PO4+), 126.05515 (C6H8NO2+), 184.07324 (C5H15NPO4+), 226.08382 (C7H17NPO5+), 333.12082 (C13H22N2PO6+), 351.13129 (C13H24N2PO7+), 369.14194 (C13H26N2PO8+)                                |
|       |         | 3.39     | 414.14084        | 121.02872 (C7H5O2-), 122.03658 (C7H6O2-, rad), 193.07440 (C10H11NO3-, rad), 208.09798 (C11H14NO3-)                                                                                                                                                                                                                                      |           |                                                                                                                                                                                                                                                  |
|       |         | 3.84     | 517.16962        | 78.95773 (PO3-), 96.96838 (H2PO4-), 150.97948 (C3H4PO5-), 223.00137 (C6H8PO7-), 241.01196 (C6H10PO8-)                                                                                                                                                                                                                                   |           |                                                                                                                                                                                                                                                  |
| ascr  | ubas#10 | 3.94     | 455.14423        | 78.95785 (PO3-), 96.96854 (H2PO4-), *102.05505 (C4H8NO2-), 117.05490 (C5H9O3-), *145.06151 (C5H9N2O3-), 163.01643 (C5H8PO4-), 191.01151 (C6H8PO5-), 209.02214 (C6H10PO6-), 309.07483 (C11H18PO8-), 337.08136 (C11H18N2PO8-), 412.13815 (C15H27NPO10-), 438.11728 (C16H25NPO11-); (* fragments present in ubas#3)                        | 457.15817 | 95.04957 (C6H7O+), 113.05998 (C6H9O2+), 129.06592 (C5H9N2O2+), 193.02597 (C6H10PO5+), 279.06253 (C10H16PO7+), 322.06853 (C11H17NPO8+), 339.09500 (C11H20N2PO8+)                                                                                  |
| ascr  | ubas#11 | 4.10     | 573.20709        | 73.02827 (C3H5O2-), 85.02839 (C4H5O2-), 99.04408 (C5H7O2-), 102.05501 (C4H8NO2-), 127.05063 (C5H7N2O2-), 247.11852 (C11H19O6-), 315.14502 (C15H23O7-), 332.17166 (C15H26NO7-), 375.17752 (C16H27N2O8-)                                                                                                                                  | 539.24467 | 70.06580 (C4H8N+), 84.04493 (C4H6NO+), 86.06055 (C4H8NO+), 104.07093 (C4H10NO2+), 112.03959 (C5H6NO2+), 113.05995 (C6H9O2+), 116.07075 (C5H10NO2+), 129.06586 (C5H9N2O2+), 130.04984 (C5H8NO3+), 147.07637 (C5H11N2O3+), 259.12885 (C11H19N2O5+) |
|       |         | 4.12     | 609.21942        | 171.04489 (C11H7O2-), 240.11574 (C16H16O2-, rad), 241.12366 (C16H17O2-), 285.11298 (C17H17O4-), 447.16623 (C23H27O9-)                                                                                                                                                                                                                   |           |                                                                                                                                                                                                                                                  |
|       |         | 4.26     | <b>252.08777</b> | 121.02876 (C7H5O2-), 122.03658 (C7H6O2-, rad), 193.07440 (C10H11NO3-, rad), 208.09798 (C11H14NO3-)                                                                                                                                                                                                                                      | 254.10216 | 91.05470 (C7H7+), 95.04956 (C6H7O+), 119.04933 (C8H7O+), 151.07533 (C9H11O2+), 194.08118 (C10H12NO3+), 219.06517 (C12H11O4+), 236.09160 (C12H14NO4+)                                                                                             |
| ascr  | ubas#5  | 4.33     | <b>361.16183</b> | 73.02904 (C3H5O2-), 85.02825 (C4H5O2-), 102.05605 (C4H8NO2-), 127.05031 (C5H7N2O2-), 145.06183 (C5H9N2O3-), 158.08220 (C7H12NO3-), 233.10286 (C10H17O6-), 301.12927 (C14H21O7-), 318.15588 (C14H24NO7-)                                                                                                                                 | 363.17619 | 129.06589 (C5H9N2O2+), 147.07635 (C5H11N2O3+), 259.12863 (C11H19N2O5+)                                                                                                                                                                           |
|       |         | 4.42     | 379.13763        | 99.04420 (C5H7O2-), 107.03542 (C3H7O4-), 117.05495 (C5H9O3-), 126.01897                                                                                                                                                                                                                                                                 | 381.15213 | 56.05032 (C3H6N+), 70.06581 (C4H8N+), 72.08144 (C4H10N+),                                                                                                                                                                                        |



|      |         |      |           |                                                                                                                                                                                                                                                                                                               |           |                                                                                                                                                                                                                                                                                                           |
|------|---------|------|-----------|---------------------------------------------------------------------------------------------------------------------------------------------------------------------------------------------------------------------------------------------------------------------------------------------------------------|-----------|-----------------------------------------------------------------------------------------------------------------------------------------------------------------------------------------------------------------------------------------------------------------------------------------------------------|
|      |         |      |           | (C5H4NO3-), 134.04663 (C5H4N5-), 160.02623 (C6H2N5O-), 217.08437 (C9H9N6O-), 261.07410 (C10H9N6O3-)                                                                                                                                                                                                           |           | 74.06068 (C3H8NO+), *102.05534 (C4H8NO2+), 119.03540 (C5H3N4+), *120.06570 (C4H10NO3+), *136.06178 (C5H6N5+), 137.04575 (C5H5N4O+), *162.04092 (C6H4N5O+), *202.10739 (C9H16NO4+), *220.11790 (C9H18NO5+), *263.08853 (C10H11N6O3+), *281.09912 (C10H13N6O4+); (* fragments present in npar#1 and npar#2) |
| S    |         | 4.55 | 353.12790 | 79.95619 (SO3-), 96.95910 (HSO4-), 113.05997 (C6H9O2-), 143.07111 (C7H11O3-), 273.17099 (C14H25O5-)                                                                                                                                                                                                           |           |                                                                                                                                                                                                                                                                                                           |
|      |         | 4.70 | 458.13425 | 131.03717 (C8H5NO-, rad), 132.04494 (C8H6NO-), 161.04549 (C6H9O5-), 294.09854 (C14H16NO6-)                                                                                                                                                                                                                    |           |                                                                                                                                                                                                                                                                                                           |
|      |         | 4.74 | 719.23315 |                                                                                                                                                                                                                                                                                                               |           |                                                                                                                                                                                                                                                                                                           |
|      |         | 4.77 | 704.22357 | 78.95788 (PO3-), 130.08678 (C6H12NO2-), 389.10129 (C16H22PO9-), 423.18927 (C17H32N2PO8-)                                                                                                                                                                                                                      | 706.23706 | 173.05560 (C6H9N2O4+), 230.07729 (C8H12N3O5+)                                                                                                                                                                                                                                                             |
|      |         | 4.79 | 389.10092 | 78.95785 (PO3-)                                                                                                                                                                                                                                                                                               | 391.11542 | 91.05466 (C7H7+), 149.02330 (C8H5O3+), 165.05452 (C9H9O3+), 179.07013 (C10H11O3+), 197.08081 (C10H13O4+), 212.99461 (C8H6PO5+), 217.02592 (C8H10PO5+), 229.99731 (C8H7PO6+, rad), 231.00507 (C8H8PO6+), 245.02071 (C9H10PO6+), 277.04706 (C10H14PO7+), 345.10950 (C15H22PO7+), 373.10413 (C16H22PO8+)     |
|      |         | 4.92 | 266.10370 | 58.02866 (C4H4NO-), 121.02874 (C7H5O2-), 136.05241 (C8H8O2-, rad), 168.04274 (C8H8O4-, rad), 222.11372 (C12H16NO3-)                                                                                                                                                                                           | 268.11761 | 91.05470 (C7H7+), 119.04933 (C8H7O+), 151.07538 (C9H11O2+), 165.09100 (C10H13O2+), 194.08116 (C10H12NO3+), 208.09686 (C11H14NO3+), 219.06516 (C12H11O4+), 233.08075 (C13H13O4+), 236.09163 (C12H14NO4+), 250.10718 (C13H16NO4+)                                                                           |
| ascr | ubas#12 | 4.96 | 389.19366 | 73.02824 (C3H5O2-), 85.02829 (C4H5O2-), 102.05493 (C4H8NO2-), 113.05978 (C6H9O2-), 127.05044 (C5H7N2O2-), 261.13425 (C12H21O6-), 329.16071 (C16H25O7-), 346.18738 (C16H28NO7-)                                                                                                                                | 391.20749 |                                                                                                                                                                                                                                                                                                           |
| ascr |         | 5.03 | 636.20721 | 78.95785 (PO3-), 96.96857 (H2PO4-), 148.96414 (C3H2PO5-), 223.00139 (C6H8PO7-), 241.01198 (C6H10PO8-), 275.15018 (C13H23O6-), 192.99060 (C5H6PO6-), 378.05963 (C13H17NPO10-), 499.15906 (C19H32PO13-)                                                                                                         | 638.22144 | 97.02882 (C5H5O2+), 98.98457 (H4PO4+), 129.09109 (C7H13O2+), 138.05499 (C7H8NO2+)                                                                                                                                                                                                                         |
|      |         | 5.10 | 545.22504 | 167.03477 (C8H7O4-), 218.09462 (C13H14O3-, rad), 219.06647 (C12H11O4-), 233.11812 (C14H17O3-), 235.09743 (C13H15O4-), 250.12137 (C14H18O4-, rad), 265.14493 (C15H21O4-), 309.13483 (C16H21O6-), 367.13998 (C18H23O8-), 383.17163 (C19H27O8-)                                                                  | 564.26563 | 127.07548 (C7H11O2+), 151.07542 (C9H11O2+), 154.06247 (C8H10O3+, rad), 169.08589 (C9H13O3+), 182.05743 (C9H10O4+, rad), 197.08090 (C10H13O4+, rad, major), 293.13824 (C16H21O5+), 367.17514 (C19H27O7+)                                                                                                   |
| ascr |         | 5.15 | 664.23914 | see 674.26752 in J2, ES- table                                                                                                                                                                                                                                                                                |           |                                                                                                                                                                                                                                                                                                           |
| S    |         | 5.16 | 267.09094 | see 267.09100 in J2, ES- table                                                                                                                                                                                                                                                                                |           |                                                                                                                                                                                                                                                                                                           |
|      |         | 5.18 | 423.16635 | 59.01258 (C2H3O2-), 71.01261 (C3H3O2-), 85.02839 (C4H5O2-), 89.02329 (C3H5O3-), 101.02341 (C4H5O3-), 113.02352 (C5H5O3-), 119.03421 (C4H7O4-), 156.05772 (C11H8O-, rad), 157.06560 (C11H9O-), 197.09715 (C14H13O-), 199.11292 (C14H15O-), 225.09233 (C15H13O2-), 243.10263 (C15H15O3-), 261.11298 (C15H17O4-) | 425.18085 |                                                                                                                                                                                                                                                                                                           |

|      |         |      |           |                                                                                                                                                                                                                                                                                                                                                                                                       |                              |                                                                                                                                                                                                                                                                                                                                                                                        |
|------|---------|------|-----------|-------------------------------------------------------------------------------------------------------------------------------------------------------------------------------------------------------------------------------------------------------------------------------------------------------------------------------------------------------------------------------------------------------|------------------------------|----------------------------------------------------------------------------------------------------------------------------------------------------------------------------------------------------------------------------------------------------------------------------------------------------------------------------------------------------------------------------------------|
| ascr | ubas#13 | 5.21 | 803.32336 | 73.02830 (C3H5O2-), 85.02842 (C4H5O2-), 102.05515 (C4H8NO2-), 127.05055 (C5H7N2O2-), 247.11893 (C11H19O6-), 285.13440 (C14H21O6-), 477.23425 (C22H37O11-), 545.26105 (C26H41O12-), 605.29340 (C27H45N2O13-)                                                                                                                                                                                           | 769.36096                    | 101.06001 (C5H9O2+), 113.05988 (C6H9O2+), 129.06583 (C5H9N2O2+), 147.07629 (C5H11N2O3+), 199.09625 (C10H15O4+), 259.12851 (C11H19N2O5+), 341.17047 (C16H25N2O6+), 359.18082 (C16H27N2O7+)                                                                                                                                                                                              |
|      |         | 5.22 | 471.18756 | see J2, ES- table                                                                                                                                                                                                                                                                                                                                                                                     |                              |                                                                                                                                                                                                                                                                                                                                                                                        |
|      |         | 5.28 | 483.22369 | 83.04906 (C5H7O-), 85.06472 (C5H9O-), 99.08047 (C6H11O-), 179.10767 (C11H15O2-), 197.11826 (C11H17O3-), 241.10812 (C12H17O5-)                                                                                                                                                                                                                                                                         | 485.23981                    | 119.08573 (C9H11+), 147.08037 (C10H11O+), 161.09604 (C11H13O+), 189.09091 (C12H13O2+), 207.10167 (C12H15O3+), 225.11211 (C12H17O4+), 243.12257 (C12H19O5+)                                                                                                                                                                                                                             |
|      |         | 5.33 | 764.26575 | 78.95795 (PO3-), 96.96865 (H2PO4-), 148.96419 (C3H2PO5-), 223.00151 (C6H8PO7-), 291.02783 (C10H12PO8-), 309.03806 (C10H14PO9-), 326.06540 (CC10H17NPO9-), 334.03305 (C11H13NPO9-), 351.05954 (C11H16N2PO9-), 352.04382 (C11H15NPO10-), 506.11871 (C18H25N3PO12-), 610.19141 (C24H37NPO15-), 627.21753 (C24H40N2PO15-), 721.25708 (C30H46N2PO16-), 747.23853 (C31H44N2PO17-)                           | 766.28025                    | 108.04473 (C6H6NO+), 109.02869 (C6H5O2+), 127.03907 (C6H7O3+), 129.06590 (C5H9N2O2+), 130.04994 (C5H8NO3+), 147.07629 (C5H11N2O3+), 189.08693 (C7H13N2O4+), 225.01579 (C6H10PO7+), 237.08665 (C11H13N2O4+), 238.07079 (C11H12NO5+), 255.09726 (C11H15N2O5+), 273.10785 (C11H17N2O6+), 353.07352, 371.08475, 383.18121 (C18H27N2O7+), 401.1903 (C18H29N2O8+), 499.16748 (C18H32N2PO12+) |
|      |         | 5.40 | 227.12906 | 85.06476 (C5H9O-), 115.07565 (C6H11O2-), 129.09145 (C7H13O2-), 135.11729 (C10H15-), 147.011743 (C11H15-), 181.12355 (C11H17O2-), 183.13904 (C11H19O2-)                                                                                                                                                                                                                                                | 229.14356                    |                                                                                                                                                                                                                                                                                                                                                                                        |
|      |         | 5.41 | 215.12904 | see J2, ES- table                                                                                                                                                                                                                                                                                                                                                                                     |                              |                                                                                                                                                                                                                                                                                                                                                                                        |
| ascr | ubas#14 | 5.42 | 827.36823 | 73.02822 (C3H5O2-), 85.02835 (C4H5O2-), 619.30884 (C28H47N2O13-)                                                                                                                                                                                                                                                                                                                                      | 783.37640                    | 69.07053 (C5H9+), 113.05991 (C6H9O2+), 115.07555 (C6H11O2+), 129.06584 (C5H9N2O2+), 147.07631 (C5H11N2O3+), 259.12854 (C11H19N2O5+), 355.18628 (C17H27N2O6+), 373.19672 (C17H29N2O7+)                                                                                                                                                                                                  |
|      |         | 5.53 | 760.27118 | 78.95785 (PO3-), 96.96856 (H2PO4-), 148.96408 (C3H2PO5-), 207.00677 (C6H8PO6-), 293.04361 (C10H14PO8-), 310.06946 (C10H17NPO8-), 336.04984 (C11H15NPO9-), 353.07584 (C11H18N2PO9-), 356.05450 (C14H15NPO8-), 424.08057 (C18H19NPO9-), 442.09070 (C18H21NPO10-), 459.11758 (C18H24N2PO10-), 485.09708 (C19H22N2PO11-), 502.12344 (C19H25N3PO11-), 717.26654 (C31H46N2PO15-), 743.24451 (C32H44N2PO16-) | 762.28568                    | same fragments as for 766.28025 at 5.33 min                                                                                                                                                                                                                                                                                                                                            |
|      |         | 5.55 | 591.27740 | see comments                                                                                                                                                                                                                                                                                                                                                                                          | see growth medium, ES+ table |                                                                                                                                                                                                                                                                                                                                                                                        |
|      |         | 5.71 | 449.18237 | 59.01258 (C2H3O2-), 71.01263 (C3H3O2-), 85.02843 (C4H5O2-), 89.02339 (C3H5O3-), 101.02351 (C4H5O3-), 113.02367 (C5H5O3-), 119.03421 (C4H7O4-), 156.05772 (C11H8O-, rad), 188.04774 (C11H8O3-, rad), 225.12859 (C16H17O-), 243.13911 (C16H19O2-)                                                                                                                                                       | 451.19687, 468.22339         | 157.06483 (C11H9O+), 253.12219 (C17H17O2+), 271.13269 (C17H19O3+)                                                                                                                                                                                                                                                                                                                      |
| ascr |         | 5.92 | 505.26627 | 73.02837 (C3H5O2-), 127.07578 (C7H11O2-), 275.14993 (C13H23O6-)                                                                                                                                                                                                                                                                                                                                       | 524.30750                    | 213.11208 (C11H17O4+), 231.12259 (C11H19O5+), 243.12248 (C12H19O5+)                                                                                                                                                                                                                                                                                                                    |
| ascr |         | 5.94 | 556.19598 | see J2, ES- table                                                                                                                                                                                                                                                                                                                                                                                     | 558.21048                    | 202.08620 (C12H12NO2+)                                                                                                                                                                                                                                                                                                                                                                 |

|      |        |      |                  |                                                                                                                                                                                                                                                   |                         |                                                                                                                                                                                                                                                                                                                                                                                                                                                                |
|------|--------|------|------------------|---------------------------------------------------------------------------------------------------------------------------------------------------------------------------------------------------------------------------------------------------|-------------------------|----------------------------------------------------------------------------------------------------------------------------------------------------------------------------------------------------------------------------------------------------------------------------------------------------------------------------------------------------------------------------------------------------------------------------------------------------------------|
| ascr |        | 5.97 | 727.21350        | 73.02828 (C3H5O2-), 78.95789 (PO3-), 92.04963 (C6H6N-), 96.96871 (H2PO4-), 136.03992 (C7H6NO2-), 148.96420 (C3H2PO5-), 162.97992 (C4H4PO5-), 453.11658 (C17H26PO12-), 590.16559 (C24H33NPO14-)                                                    | 729.22800               | 92.05000 (C6H6N+), 101.06001 (C5H9O2+), 120.04459 (C7H6NO+), 127.03911 (C6H7O3+), 132.04424 (C8H6NO+), 138.05495 (C7H8NO2+), 204.06557 (C11H10NO3+), 209.08099 (C11H13O4+), 216.06531 (C12H10NO3+), 225.01575 (C6H10PO7+), 228.06548 (C13H10NO3+), 246.07602 (C13H12NO4+), 264.08643 (C13H14NO5+), 362.06335 (C13H17NPO9+)                                                                                                                                     |
|      |        | 6.04 | 431.14777        | 78.95784 (PO3-)                                                                                                                                                                                                                                   | 433.16227               | 151.07535 (C9H11O2+), 179.07019 (C10H11O3+), 245.02086 (C9H10PO6+), 277.04694 (C10H14PO7+), 317.07819 (C13H18PO7+)                                                                                                                                                                                                                                                                                                                                             |
| ascr |        | 6.18 | <b>601.24078</b> | see J2, ES- table                                                                                                                                                                                                                                 |                         |                                                                                                                                                                                                                                                                                                                                                                                                                                                                |
| ascr |        | 6.18 | 894.35376        | 78.95786 (PO3-), 96.96860 (H2PO4-), 127.07582 (C7H11O2-), 136.03992 (C7H6NO2-), 148.96420 (C3H2PO5-), 192.99057 (C5H6PO6-), 223.00151 (C6H8PO7-), 241.01205 (C6H10PO8-), 275.15070 (C13H23O6-), 378.06049 (C13H17NPO10-), 757.30591 (C32H54PO18-) | 896.36826               | 97.02883 (C5H5O2+), 98.98456 (H4PO4+), 111.08075 (C7H11O+), 113.06001 (C6H9O2+), 120.04455 (C7H6NO+), 127.03911 (C6H7O3+), 129.09109 (C7H13O2+), 138.05490 (C7H8NO2+), 145.04947 (C6H9O4+), 225.01576 (C6H10PO7+), 232.09660 (C13H14NO3+), 241.14326 (C13H21O4+), 243.02629 (C6H12PO8+), 250.10779 (C13H16NO4+), 255.12302 (C13H19O5+), 259.15393 (C13H23O5+), 268.11813 (C13H18NO5+), 353.09933 (C13H22PO9+), 371.11011 (C13H24PO10+), 378.19138 (C20H28NO6+) |
| S    |        | 6.35 | <b>337.13330</b> | see J2, ES- table                                                                                                                                                                                                                                 |                         |                                                                                                                                                                                                                                                                                                                                                                                                                                                                |
| ascr |        | 6.51 | 755.24402        | 78.95787 (PO3-), 92.04950 (C6H6N-), 96.96857 (H2PO4-), 136.03987 (C7H6NO2-), 148.96422 (C3H2PO5-), 223.00208 (C6H8PO7-), 342.03897 (C13H13NPO8-), 618.19501 (C26H37NPO14-)                                                                        | 757.25852               | 120.04461 (C7H6NO+, major), 138.05502 (C7H8NO2+), 246.07587 (C13H12NO4+), 264.08636 (C13H14NO5+), 362.06323 (C13H17NPO9+)                                                                                                                                                                                                                                                                                                                                      |
|      |        | 6.63 | <b>256.15564</b> | 74.02354 (C2H4NO2-), 194.15512 (12H2ONO-)                                                                                                                                                                                                         | 240.15952               | 76.03992 (C2H6NO2+), 194.15396 (C12H20NO+)                                                                                                                                                                                                                                                                                                                                                                                                                     |
|      |        | 6.67 | 670.19171        | 78.95782 (PO3-), 96.96854 (H2PO4-), 204.99052 (C6H6PO6-), 223.00117 (C6H8PO7-), 241.01195 (C6H10PO8-), 515.13336 (C22H28PO12-), 533.14276 (C22H30PO13-)                                                                                           | 672.20621               | 120.04471 (C7H6NO+), 127.03910 (C6H7O3+), 151.07544 (C9H11O2+), 154.06230 (C8H10O3+, rad), 169.08574 (C9H13O3+), 182.05737 (C9H10O4+, rad), 197.08089 (C10H13O4+, major), 293.13837 (C16H21O5+), 309.13306 (C16H21O6+)                                                                                                                                                                                                                                         |
| ascr | tasc#1 | 7.65 | 791.44427        | 73.02825 (C3H5O2-), 127.07572 (C7H11O2-), 145.08659 (C7H13O3-), 275.14987 (C13H23O6-), 533.29700 (C26H45O11-)                                                                                                                                     | 793.45877,<br>810.48486 | 83.08608 (C6H11+), 85.06532 (C5H9O+), 95.04955 (C6H7O+), 111.08073 (C7H11O+), 113.05994 (C6H9O2+), 129.09105 (C7H13O2+), 147.10156 (C7H15O3+), 183.13792 (C11H19O2+), 207.10165 (C12H15O3+), 225.11206 (C12H17O4+), 241.14323 (C13H21O4+), 259.15381 (C13H23O5+), 353.19553 (C19H29O6+), 371.20633 (C19H31O7+), 389.21716 (C19H33O8+)                                                                                                                          |
|      |        | 7.72 | <b>449.27560</b> |                                                                                                                                                                                                                                                   | 422.31140,<br>427.26642 |                                                                                                                                                                                                                                                                                                                                                                                                                                                                |
| ascr |        | 8.21 | 567.28156        | 73.02827 (C3H5O2-), 127.07578 (C7H11O2-), 151.03975 (C8H7O3-), 165.05545 (C9H9O3-), 166.02692 (C8H6O4-, rad), 167.03485 (C8H7O4-), 181.05081 (C9H9O4-), 275.14999                                                                                 | 586.32312,<br>591.27826 | 113.06007 (C6H9O2+), 127.07548 (C7H11O2+), 136.05191 (C8H8O2+, rad), 137.05974 (C8H9O2+), 151.07542 (C9H11O2+), 154.06244 (C8H10O3+, rad), 169.08583                                                                                                                                                                                                                                                                                                           |

|  |  |       |                                     |  |                                                                                                                   |
|--|--|-------|-------------------------------------|--|-------------------------------------------------------------------------------------------------------------------|
|  |  |       | (C13H23O6-), 535.25507 (C28H39O10-) |  | (C9H13O3+), 182.05743 (C9H10O4+, rad), 197.08086 (C10H13O4+, major), 261.11240 (C15H17O4+), 293.13837 (C16H21O5+) |
|  |  | 8.24  | 371.97586                           |  | 213.14853                                                                                                         |
|  |  | 10.03 | 355.15863                           |  |                                                                                                                   |

**Table S12.** Differential metabolites from *P. pacificus* J2 medium, ES+ mode, that are decreased or absent in RS2770 *Ppa-daf-22* medium compared to RS2333. Peaks that are present but not differential in growth medium are shown in blue. Peaks that are also differential in growth medium are shown in red. Peaks that are also in growth medium table (ES+) are shown in bold red. Entries that have a corresponding peak in the ES- table are shaded grey.

| class | smid-db | rt (min) | m/z (ES+)        | MS/MS (ES+)                                                                                                                                                                                                                                                                                                                                                               | m/z (ES-) |
|-------|---------|----------|------------------|---------------------------------------------------------------------------------------------------------------------------------------------------------------------------------------------------------------------------------------------------------------------------------------------------------------------------------------------------------------------------|-----------|
|       |         | 1.00     | 419.14795        | 91.05475 (C7H7+), 119.04942 (C8H7O+), 123.04424 (C7H7O2+), 130.04985 (C5H8NO3+), 136.07576 (C8H10NO+), 147.04416 (C9H7O2+), 162.02190 (C5H8NSO3+), 165.05464 (C9H9O3+), 182.08116 (C9H12NO3+), 238.07434 (C8H16NSO5+)                                                                                                                                                     |           |
|       |         | 1.02     | 466.30219        | 58.06596 (C3H8N+), 84.08135 (C5H10N+), 98.09685 (C6H12N+), 116.10728 (C6H14NO+), 126.09153 (C7H12NO+), 128.10715 (C7H14NO+), 144.10172 (C7H14NO2+), 150.09152 (C9H12NO+), 240.17059 (C12H22N3O2+), 351.23886 (C18H31N4O3+), 369.24954 (C18H33N4O4+)                                                                                                                       |           |
| ascr  |         | 2.96     | <b>316.21198</b> | 70.06584 (C4H8N+), 99.08086 (C6H11O+), 116.07085 (C5H10NO2+), 126.09153 (C7H12NO+), 186.14885 (C10H20NO2+), 200.12817 (C10H18NO3+)                                                                                                                                                                                                                                        |           |
| ascr  |         | 3.14     | <b>433.16763</b> | see J2, ES- table                                                                                                                                                                                                                                                                                                                                                         |           |
| S     |         | 3.38     | 306.10083        | see J2, ES- table                                                                                                                                                                                                                                                                                                                                                         |           |
| ascr  |         | 3.78     | 586.23486        | see J2, ES- table                                                                                                                                                                                                                                                                                                                                                         |           |
|       |         | 3.97     | 223.09423        |                                                                                                                                                                                                                                                                                                                                                                           |           |
|       |         | 4.07     | 285.13086        |                                                                                                                                                                                                                                                                                                                                                                           |           |
|       |         | 4.67     | 583.20569        | 105.07027 (C8H9+), 121.06500 (C8H9O+), 204.10207 (C12H14NO2+); 5.0 min peak additionally has 120.04470 (C7H6NO+)                                                                                                                                                                                                                                                          |           |
|       |         | 4.71     | 734.23242        | 105.07027 (C8H9+), 136.03941 (C7H6NO2+), 204.10210 (C12H14NO2+), 222.11243 (C12H16NO3+), 244.06050 (C13H10NO4+), 264.12289 (C14H18NO4+), 330.13348 (C18H20NO5+)                                                                                                                                                                                                           |           |
| ascr  |         | 4.87     | 927.36133        | see J2, ES- table                                                                                                                                                                                                                                                                                                                                                         |           |
|       |         | 5.04     | 718.23773        | see J2, ES- table                                                                                                                                                                                                                                                                                                                                                         |           |
| ascr  |         | 5.15     | <b>562.20532</b> | see J2, ES- table                                                                                                                                                                                                                                                                                                                                                         |           |
| ascr  |         | 5.15     | <b>647.30286</b> | see J2, ES- table                                                                                                                                                                                                                                                                                                                                                         |           |
|       |         | 5.21     | 733.30493        | 97.02882 (C5H5O2+), 120.08099 (C8H10N+), 135.03032 (C5H3N4O+), 152.05673 (C5H6N5O+), 153.04076 (C5H5N4O2+), 202.08643 (C12H12NO2+), 220.09691 (C12H14NO3+), 316.11813 (C17H18NO5+), 334.12839 (C17H20NO6+), 452.19226 (C23H26N5O5+), 485.17850 (C22H25N6O7+), 503.18915 (C22H27N6O8+), 603.24066 (C27H35N6O10+)                                                           |           |
|       |         | 5.22     | <b>490.22897</b> | see J2, ES- table                                                                                                                                                                                                                                                                                                                                                         |           |
|       |         | 5.26     | 529.24115        | 164.09314 (C7H10N5+)                                                                                                                                                                                                                                                                                                                                                      |           |
| ascr  |         | 5.27     | <b>476.18973</b> | 127.03675 (C4H8O3Na+), 184.07330 (C10H11NONa+), 242.07794 (C12H13NO3Na+), 257.09930 (C10H18O6Na+)                                                                                                                                                                                                                                                                         | 452.19333 |
| ascr  |         | 5.39     | 661.31818        | see J2, ES- table                                                                                                                                                                                                                                                                                                                                                         |           |
| ascr  |         | 5.39     | 564.24164        | 141.05228 (C5H10O3Na+), 184.07339 (C10H11NONa+), 271.11508 (C11H20O6Na+), 316.11563 (C15H19NO5Na+)                                                                                                                                                                                                                                                                        |           |
| ascr  |         | 5.42     | <b>765.30865</b> | see J2, ES- table                                                                                                                                                                                                                                                                                                                                                         |           |
|       |         | 5.44     | 747.32025        | 97.02882 (C5H5O2+), 120.08099 (C8H10N+), 135.03032 (C5H3N4O+), 152.05673 (C5H6N5O+), 153.04076 (C5H5N4O2+), 202.08643 (C12H12NO2+), 220.09691 (C12H14NO3+), 316.11813 (C17H18NO5+), 334.12839 (C17H20NO6+), 466.20773 (C24H28N5O5+), 485.17850 (C22H25N6O7+), 617.25757 (C28H37N6O10+)                                                                                    |           |
|       |         | 5.65     | <b>519.19788</b> | 101.02374 (C4H5O3+), 103.05464 (C8H7+), 120.08102 (C8H10N+), 146.06009 (C9H8NO+), 156.08087 (C11H10N+), 157.06494 (C11H9O+), 174.09135 (C11H12NO+), 184.07565 (C12H10NO+), 202.08633 (C12H12NO2+), 220.09686 (C12H14NO3+), 228.06552 (C13H10NO3+), 238.10753 (C12H16NO4+), 262.10718 (C14H16NO4+), 346.12881 (C18H20NO6+), 364.13895 (C18H22NO7+), 382.14972 (C18H24NO8+) |           |
| ascr  |         | 5.71     | <b>544.19452</b> | see J2, ES- table                                                                                                                                                                                                                                                                                                                                                         |           |
| ascr  |         | 5.76     | <b>749.31293</b> | see J2, ES- table                                                                                                                                                                                                                                                                                                                                                         |           |
| ascr  |         | 6.16     | <b>603.25531</b> | see J2, ES- table                                                                                                                                                                                                                                                                                                                                                         |           |
|       |         | 6.31     | 730.31995        | 99.08089 (C6H11O+), 109.02870 (C6H5O2+), 127.03911 (C6H7O3+), 136.07596 (C8H10NO+), 145.04970 (C6H9O4+), 177.12747 (C12H17O+), 184.07324 (C5H15NPO4+), 195.13792 (C12H19O2+), 225.01587 (C6H10PO7+), 267.12320 (C14H19O5+), 321.16983 (C18H25O5+), 339.17993 (C18H27O6+)                                                                                                  | 728.30527 |
|       |         | 6.45     | 525.18475        | 244.09453 (C12H15NO3Na+), 388.13678 (C18H23NO7Na+)                                                                                                                                                                                                                                                                                                                        |           |
| ascr  |         | 6.57     | <b>481.25488</b> | 101.02374 (C4H5O3+), 103.05464 (C8H7+), 120.08102 (C8H10N+), 146.06009                                                                                                                                                                                                                                                                                                    |           |

|  |       |                  |  |                                                                                                                                                                                                                                                                                                                    |                              |
|--|-------|------------------|--|--------------------------------------------------------------------------------------------------------------------------------------------------------------------------------------------------------------------------------------------------------------------------------------------------------------------|------------------------------|
|  |       |                  |  | (C9H8NO+), 156.08087 (C11H10N+), 157.06494 (C11H9O+), 174.09135 (C11H12NO+), 184.07565 (C12H10NO+), 202.08633 (C12H12NO2+), 220.09686 (C12H14NO3+), 238.10753 (C12H16NO4+)                                                                                                                                         |                              |
|  | 7.00  | 639.25244        |  | 141.05228 (C5H10O3Na+), 184.07372 (C10H11NONa+), 190.04985 (C10H8NO3+), 202.08633 (C12H12NO2+), 391.12634 (C20H20N2O5Na+)                                                                                                                                                                                          | 615.25593                    |
|  | 7.17  | 569.24957        |  | see comments                                                                                                                                                                                                                                                                                                       |                              |
|  | 7.29  | <b>309.13324</b> |  | 171.08043 (C12H11O+), 195.10165 (C11H15O3+), 197.08070 (C10H13O4+), 199.07539 (C13H11O2+), 217.08594 (C13H13O3+), 231.10165 (C14H15O3+), 259.09628 (C15H15O4+), 263.12775 (C15H19O4+), 291.12262 (C16H19O5+)                                                                                                       | see growth medium, ES+ table |
|  | 7.50  | <b>601.27594</b> |  | 55.01865 (C3H3O+), 91.05473 (C7H7+), 103.05456 (C8H7+), 120.08099 (C8H10N+), 146.06017 (C9H8NO+), 156.08092 (C11H10N+), 157.06480 (C11H9O+), 174.09132 (C11H12NO+), 184.07574 (C12H10NO+), 202.08633 (C12H12NO2+), 220.09682 (C12H14NO3+), 234.07614 (C12H12NO4+), 320.14926 (C17H22NO5+), 353.14954 (C20H21N2O4+) |                              |
|  | 8.04  | <b>255.23172</b> |  | 219.21065 (C16H27+), 237.22112 (C16H29O+)                                                                                                                                                                                                                                                                          |                              |
|  | 8.22  | <b>675.37836</b> |  | 56.96563 (CaOH+), 115.00687 (C3H7O2Ca+), 171.06929 (C7H15O2Ca+), 189.07980 (C7H17O3Ca+), 251.09470 (C12H19O3Ca+), 269.10602 (C12H21O4Ca+), 287.11633 (C12H23O5Ca+), 463.23657 (C24H39O6Ca+), 481.24756 (C24H41O7Ca+)                                                                                               |                              |
|  | 10.52 | 506.32443        |  | see J2, ES- table                                                                                                                                                                                                                                                                                                  |                              |

**Table S13. Differential metabolites from *P. pacificus* growth medium, ES+ mode, that are decreased or absent in RS2770 *Ppa-daf-22* medium compared to RS2333. Peaks that are present but not differential in J2 medium are shown in blue. Peaks that are also differential in J2 medium are shown in red. Peaks that are also in J2 medium table (ES+) are shown in bold red. Entries that have a corresponding peak in the ES- table are shaded grey.**

| class | smid-db | rt (min) | m/z (ES+)                 | MS/MS (ES+)                                                                                                                                                                                                                                                                                                                                                                  | m/z (ES-)            | MS/MS (ES-)                                                                                                                                                                                                                                                                                                |
|-------|---------|----------|---------------------------|------------------------------------------------------------------------------------------------------------------------------------------------------------------------------------------------------------------------------------------------------------------------------------------------------------------------------------------------------------------------------|----------------------|------------------------------------------------------------------------------------------------------------------------------------------------------------------------------------------------------------------------------------------------------------------------------------------------------------|
|       |         | 2.00     | <a href="#">231.13370</a> | see growth medium, ES- table                                                                                                                                                                                                                                                                                                                                                 |                      |                                                                                                                                                                                                                                                                                                            |
|       |         | 4.30     | 695.25238                 | 152.05669 (C5H6N5O+), 165.09102 (C10H13O2+), 208.09702 (C11H14NO3+), 284.09857 (C10H14N5O5+), 563.21045 (C24H31N6O10+)                                                                                                                                                                                                                                                       |                      |                                                                                                                                                                                                                                                                                                            |
|       |         | 4.34     | <a href="#">254.10216</a> | see growth medium, ES- table                                                                                                                                                                                                                                                                                                                                                 |                      |                                                                                                                                                                                                                                                                                                            |
|       |         | 4.58     | 428.16656                 | 129.06589 (C5H9N2O2+), 147.07639 (C5H11N2O3+), 153.01814 (C7H5O4+), 220.09682 (C12H14NO3+), 228.06551 (C13H10NO3+), 238.07086 (C11H12NO5+), 253.06729 (C7H13N2O8+), 256.08136 (C11H14NO6+), 266.13834 (C14H20NO4+), 273.10806 (C11H17N2O6+), 291.11847 (C11H19N2O7+)                                                                                                         | 462.12891, 472.15744 | 92.04958 (C6H6N-), 127.05065 (C5H7N2O2-), 136.03986 (C7H6NO2-)                                                                                                                                                                                                                                             |
|       |         | 4.75     | <a href="#">706.23706</a> | see growth medium, ES- table                                                                                                                                                                                                                                                                                                                                                 |                      |                                                                                                                                                                                                                                                                                                            |
|       |         | 4.77     | 391.11456                 | 91.05470 (C7H7+), 151.07533 (C9H11O2+), 165.05464 (C9H9O3+), 179.07021 (C10H11O3+), 197.08083 (C10H13O4+), 245.02080 (C14H6O3Na+), 277.04700 (C15H10O4Na+), 345.10962 (C20H18O4Na+), 373.10434 (C21H18O5Na+)                                                                                                                                                                 |                      |                                                                                                                                                                                                                                                                                                            |
| ascr  | ubas#8  | 4.78     | 497.22470                 | 66.03432 (C4H4N+), 93.04485 (C5H5N2+), 121.03969 (C6H5N2O+), 129.06584 (C5H9N2O2+), 319.12891 (C16H19N2O5+), 379.16119 (C17H23N4O6+)                                                                                                                                                                                                                                         | 495.20965            | 73.02824 (C3H5O2-), 85.02834 (C4H5O2-), 93.04472 (C5H5N2-), 102.05504 (C4H8NO2-), 119.02426 (C6H3N2O-), 137.03505 (C6H5N2O2-), 367.15103 (C17H23N2O7-), 435.17740 (C21H27N2O8-), 452.20419 (C21H30N3O8-), 478.18317 (C22H28N3O9-)                                                                          |
|       |         | 4.91     | <a href="#">268.11761</a> | see growth medium, ES- table                                                                                                                                                                                                                                                                                                                                                 |                      |                                                                                                                                                                                                                                                                                                            |
|       |         | 4.96     | 435.20654                 | 104.05318 (C4H10NS+), 110.09667 (C7H12N+), *118.06528 (C8H8N+), 120.08090 (C8H10N+), 127.08659 (C6H11N2O+), 129.10228 (C6H13N2O+), *132.08075 (C9H10N+), *146.06000 (C9H8NO+), 158.09978 (C8H16NS+), *159.09158 (C10H11N2+), *188.07047 (C11H10NO2+), 203.12114 (C9H19N2SO+), *205.09706 (C11H13N2O2+), 231.11601 (C10H19N2SO2+), 304.16534 (C16H22N3O3+); (* Trp fragments) | 433.19204            | *74.02349 (C2H4NO2-), 99.05527 (C4H7N2O-), 115.08682 (C5H11N2O-), *116.04970 (C8H6N-), 129.10262 (C6H13N2O-), *142.06570 (C10H8N-), *159.09250 (C10H11N2-), 164.07141 (C9H10NO2-), 198.12485 (C9H16N3O2-), *203.08264 (C11H11N2O2-), 229.10146 (C10H17N2SO2-), 304.13373 (C12H22N3SO4-); (* Trp fragments) |
| ascr  |         | 5.02     | <a href="#">638.22144</a> | see growth medium, ES- table                                                                                                                                                                                                                                                                                                                                                 |                      |                                                                                                                                                                                                                                                                                                            |
|       |         | 5.08     | <a href="#">564.26563</a> | see growth medium, ES- table                                                                                                                                                                                                                                                                                                                                                 |                      |                                                                                                                                                                                                                                                                                                            |
| ascr  | npar#4  | 5.09     | <a href="#">689.24530</a> | 102.05534 (C4H8NO2+), 120.06574 (C4H10NO3+), 134.04614 (C5H4N5+), 152.05676 (C5H6N5O+), 160.02501 (C6H2N5O+), 165.02298 (C6H5N4S+), 182.04947 (C6H8N5S+), 202.10747 (C9H16NO4+), 208.02882 (C7H6N5SO+), 220.11800 (C9H18NO5+), 309.07666 (C11H13N6SO3+), 327.08682 (C11H15N6SO4+), 340.07095 (C12H14N5SO5+), 427.13959 (C16H23N6SO6+)                                        | 687.23080            | 73.02824 (C3H5O2-), 99.04413 (C5H7O2-), 111.04429 (C6H7O2-), 126.01894 (CC5H4NO3-), 147.06561 (C6H11O4-), 180.03470 (C6H6N5S-), 247.11861 (C11H19O6-), 286.12991 (C13H20NO6-), 348.16632 (C15H26NO8-), 374.14569 (C16H24NO9-)                                                                              |
| ascr  |         | 5.15     | <a href="#">647.30292</a> | see 674.26752 in J2, ES- table                                                                                                                                                                                                                                                                                                                                               |                      |                                                                                                                                                                                                                                                                                                            |
|       |         | 5.18     | <a href="#">488.21335</a> | 143.08553 (C11H11+), 171.08041 (C12H11O+), 189.09097 (C12H13O2+), 199.07541 (C13H11O2+), 217.08595                                                                                                                                                                                                                                                                           | 469.17154            | 217.05052 (C12H9O4-), 232.07396 (C13H12O4- rad), 247.09740 (C14H15O4-),                                                                                                                                                                                                                                    |

|      |             |      |           |                                                                                                                                                                                                                                                                                                                                                                                                                                                        |                                           |                                                                                                                                                                                                                                 |
|------|-------------|------|-----------|--------------------------------------------------------------------------------------------------------------------------------------------------------------------------------------------------------------------------------------------------------------------------------------------------------------------------------------------------------------------------------------------------------------------------------------------------------|-------------------------------------------|---------------------------------------------------------------------------------------------------------------------------------------------------------------------------------------------------------------------------------|
|      |             |      |           | (C13H13O3+), 227.07021 (C14H11O3+), 231.10155 (C14H15O3+), 259.09650 (C15H15O4+), 277.10712 (C15H17O5+), 291.12250 (C16H19O5+), 309.13318 (C16H21O6+)                                                                                                                                                                                                                                                                                                  |                                           | 262.12082 (C15H18O4-, rad), 263.12869 (C15H19O4-), 425.18182 (C21H29O9-)                                                                                                                                                        |
| ascr | ubas#13     | 5.21 | 769.36096 | see growth medium, ES- table                                                                                                                                                                                                                                                                                                                                                                                                                           |                                           |                                                                                                                                                                                                                                 |
|      |             | 5.22 | 490.22900 | see 471.18762 (-) in J2, ES- table                                                                                                                                                                                                                                                                                                                                                                                                                     |                                           |                                                                                                                                                                                                                                 |
|      |             | 5.26 | 485.23981 | see growth medium, ES- table                                                                                                                                                                                                                                                                                                                                                                                                                           |                                           |                                                                                                                                                                                                                                 |
| ascr | ubas#15     | 5.36 | 550.24176 | 55.01870 (C3H3O+), 102.03761 (C4H8NS+), 113.05998 (C6H9O2+), 115.02142 (C5H7SO+), 129.06592 (C5H9N2O2+), 132.04782 (C5H10NSO+), 139.07536 (C8H11O2+), 167.07008 (C9H11O3+), 174.05838 (C7H12NSO2+), 185.08066 (C9H13O4+), 192.06866 (C7H14NSO3+), 241.10699 (C12H17O5+), 253.10693 (C13H17O5+), 296.11270 (C14H18NO6+), 313.13928 (C14H21N2O6+), 372.14728 (C17H26NSO6+), 389.17410 (C17H29N2SO6+), 415.15356 (C18H27N2SO7+), 432.17987 (C18H30N3SO7+) | 548.22834                                 | 58.02841 (C2H4NO-), 71.01244 (C3H3O2-), 85.02815 (C4H5O2-), 99.04399 (C5H7O2-), 102.05476 (C4H8NO2-), 118.03209 (C4H8NSO-), 127.05003 (C5H7N2O2-), 301.12866 (C14H21O7-), 369.15445 (C18H25O8-), 429.18689 (C19H29N2O9-)        |
|      |             | 5.37 | 723.36334 | 141.02232 (C5H9O2Ca+), 155.03784 (C6H11O2Ca+), 173.04855 (C6H13O3Ca+), 187.06413 (C7H15O3Ca+), 199.06429 (C8H15O3Ca+), 205.07477 (C7H17O4Ca+), 223.10034 (C11H19O2Ca+), 241.11084 (C11H21O3Ca+), 267.09009 (C12H19O4Ca+), 285.10077 (C12H21O5Ca+), 495.22684 (C24H39O8Ca+)                                                                                                                                                                             | see 227.12906 in growth medium, ES- table |                                                                                                                                                                                                                                 |
| ascr | ubas#14     | 5.42 | 783.37640 | see growth medium, ES- table                                                                                                                                                                                                                                                                                                                                                                                                                           |                                           |                                                                                                                                                                                                                                 |
| ascr |             | 5.43 | 782.33484 | see 763.29425 in J2, ES- table                                                                                                                                                                                                                                                                                                                                                                                                                         |                                           |                                                                                                                                                                                                                                 |
|      |             | 5.53 | 282.13367 | 91.05473 (C7H7+), 103.05461 (C8H7+), 105.07026 (C8H9+), 107.04955 (C7H7O+), 119.04937 (C8H7O+), 133.06487 (C9H9O+), 150.06757 (C9H10O2+, rad), 151.07545 (C9H11O2+), 165.09102 (C10H13O2+), 194.08138 (C10H12NO3+), 208.09688 (C11H14NO3+), 233.08095 (C13H13O4+)                                                                                                                                                                                      |                                           |                                                                                                                                                                                                                                 |
| ascr |             | 5.55 | 728.33911 | 101.02374 (C4H5O3+), 103.05464 (C8H7+), 120.08102 (C8H10N+), 144.08086 (C10H10N+), 146.06009 (C9H8NO+), 156.08087 (C11H10N+), 157.06494 (C11H9O+), 174.09135 (C11H12NO+), 184.07565 (C12H10NO+), 202.08633 (C12H12NO2+), 220.09686 (C12H14NO3+), 238.10753 (C12H16NO4+), 261.12311 (C14H17N2O3+)                                                                                                                                                       | 726.32461                                 |                                                                                                                                                                                                                                 |
| ascr |             | 5.55 | 593.29175 | 83.04973 (C5H7O+), 87.04459 (C4H7O2+), 113.06001 (C6H9O2+), 129.06593 (C5H9N2O2+), 130.04999 (C5H8NO3+), 147.07642 (C5H11N2O3+), 199.09677 (C10H15O4+), 259.12875 (C11H19N2O5+), 327.15491 (C15H23N2O6+), 345.16559 (C15H25N2O7+)                                                                                                                                                                                                                      | see growth medium, ES- table              |                                                                                                                                                                                                                                 |
|      |             | 5.94 | 275.13922 | 118.06543 (C8H8N+), 130.06519 (C9H8N+), 132.08092 (C9H10N+), 146.06007 (C9H8NO+), 159.09166 (C10H11N2+), 188.07060 (C11H10NO2+), 205.09732 (C11H13N2O2+), 229.13359 (C14H17N2O+)                                                                                                                                                                                                                                                                       | 273.12472                                 | *74.02348 (C2H4NO2-), 86.05991 (C4H8NO-), *116.04958 (C8H6N-), 144.06598 (C6H10NO3-), *159.09238 (C10H11N2-), *203.08261 (C11H11N2O2-); (* Trp fragments)                                                                       |
| ascr | ubas#16, 17 | 6.05 | 596.28204 | ubas#16: 101.02375 (C4H5O3+), 103.05464 (C8H7+), 104.07110 (C4H10NO2+), 113.05990 (C6H9O2+), 120.08096 (C8H10N+), 129.06593 (C5H9N2O2+), 147.07635 (C5H11N2O3+), 174.09108 (C11H12NO+), 202.08604 (C12H12NO3+), 220.09677 (C12H14NO3+), 259.12839 (C11H19N2O5+); ubas#17: 91.05474 (C7H7+), 03.05466 (C8H7+), 113.06017                                                                                                                                | 594.26683                                 | 73.02805 (C3H5O2-), 85.02814 (C4H5O2-), 98.02347 (C4H4NO2-), 102.05483 (C4H8NO2-), 127.05022 (C5H7N2O2-), 218.08160 (C12H12NO3-), 247.11832 (C11H19O6-), 315.14447 (C15H23O7-), 332.17105 (C15H26NO7-), 375.17661 (C16H27N2O8-) |



|      |         |      |           |                                                                                                                                                                                                                                                                                                                                            |           |                                                                                                                                                                                                                                                                                                                                                                                                                                                                                                                                                         |
|------|---------|------|-----------|--------------------------------------------------------------------------------------------------------------------------------------------------------------------------------------------------------------------------------------------------------------------------------------------------------------------------------------------|-----------|---------------------------------------------------------------------------------------------------------------------------------------------------------------------------------------------------------------------------------------------------------------------------------------------------------------------------------------------------------------------------------------------------------------------------------------------------------------------------------------------------------------------------------------------------------|
|      |         |      |           | (C6H9O2+), 120.08099 (C8H10N+), 129.06592 (C5H9N2O2+), 146.06006 (C9H8NO+), 156.08089 (C11H10N+), 174.09140 (C11H12NO+), 184.07570 (C12H10NO+), 202.08604 (C12H12NO3+), 220.09677 (C12H14NO3+), 400.17554 (C22H26NO6+), 417.20193 (C22H29N2O6+), 435.21286 (C22H31N2O7+), 460.20792 (C23H30N3O7+), 478.21890 (C23H32N3O8+)                 |           |                                                                                                                                                                                                                                                                                                                                                                                                                                                                                                                                                         |
|      |         | 6.06 | 297.18112 | 87.05581 (C3H7N2O+), 88.03981 (C3H6NO2+), 116.03448 (C4H6NO3+), 133.06082 (C4H9N2O3+), 150.12778 (C10H16N+), 165.12738 (C11H17O+), 182.15417 (C11H20NO+), 192.13829 (C12H18NO+), 234.14865 (C14H20NO2+), 251.17503 (C14H23N2O2+), 252.15918 (C14H22NO3+), 280.15421 (C15H22NO4+)                                                           |           |                                                                                                                                                                                                                                                                                                                                                                                                                                                                                                                                                         |
| ascr | ubas#18 | 6.11 | 626.29272 | 91.05470 (C7H7+), 119.04939 (C8H7O+), 129.06592 (C5H9N2O2+), 151.07530 (C9H11O2+), 250.10721 (C13H16NO4+), 268.11761 (C13H18NO5+), 448.19656 (C23H30NO8+), 465.22342 (C23H33N2O8+), 491.20313 (C24H31N2O9+), 508.22946 (C24H34N3O9+)                                                                                                       | 624.27740 | 73.02808 (C3H5O2-), 85.02812 (C4H5O2-), 98.02361 (C4H4NO2-), 99.04397 (C5H7O2-), 102.05483 (C4H8NO2-), 127.05057 (C5H7N2O2-), 233.06892 (C9H13O7- ?), 247.11806 (C11H19O6-), 248.09222 (C13H14NO4-), 315.14420 (C15H23O7-), 332.17181 (C15H26NO7-), 375.17618 (C16H27N2O8-)                                                                                                                                                                                                                                                                             |
| ascr |         | 6.11 | 720.34467 | 151.07533 (C9H11O2+), 154.06245 (C8H10O3+, rad), 169.08585 (C9H13O3+), 182.05714 (C9H10O4+, rad), 197.08086 (C10H13O4+), 293.13824 (C16H21O5+)                                                                                                                                                                                             | 701.30417 | 73.02823 (C3H5O2-), 111.04420 (C6H7O2-), 139.03940 (C7H7O3-), 150.03181 (C8H6O3-, rad), 151.03979 (C8H7O3-), 165.05540 (C9H9O3-), 166.02684 (C8H6O4-, rad), 167.03468 (C8H7O4-), 168.04256 (C8H8O4-, rad), 172.05261 (C11H8O2-, rad), 181.05052 (C9H9O4-), 185.06055 (C12H9O2-), 195.06606 (C10H11O4-), 218.09492 (C13H14O3-, rad), 235.09763 (C13H15O4-), 247.11876 (C11H19O6-), 250.12074 (C14H18O4-, rad), 277.10776 (C15H17O5-), 291.12466 (C16H19O5-), 309.13461 (C16H21O6-), 339.16058 (C21H23O4-), 501.21332 (C27H33O9-), 539.24957 (C27H39O11-) |
| ascr |         | 6.13 | 896.36810 | 97.02884 (C5H5O2+), 98.98459 (H4PO4+), 111.08079 (C7H11O+), 113.06005 (C6H9O2+), 127.03905 (C6H7O3+), 129.09106 (C7H13O2+), 138.05504 (C7H8NO2+), 145.04953 (C6H9O4+), 225.01570 (C6H10PO7+), 232.09660 (C13H14NO3+), 241.14357 (C13H21O4+), 243.02361 (C6H12PO8+), 259.15414 (C13H23O5+), 353.09943 (C13H22PO9+), 371.10974 (C13H24PO10+) | 894.35360 | 73.02827 (C3H5O2-), 78.95783 (PO3-), 92.04933 (C6H6N-), 96.96856 (H2PO4-), 127.07549 (C7H11O2-), 136.03966 (C7H6NO2-), 148.96407 (C3H2PO5-), 150.97972 (C3H4PO5-), 162.97954 (C4H4PO5-), 192.99068 (C5H6PO6-), 223.00137 (C6H8PO7-), 241.01195 (C6H10PO8-), 275.15009 (C13H23O6-), 378.05991 (C13H17NPO10-), 757.30573 (C32H54PO18-)                                                                                                                                                                                                                    |
| ascr |         | 6.15 | 538.32269 | 111.08077 (C7H11O+), 113.06001 (C6H9O2+), 129.09111 (C7H13O2+), 147.10173 (C7H15O3+), 183.13802 (C11H19O2+), 225.11232 (C12H17O4+), 241.14336 (C13H21O4+), 259.15393 (C13H23O5+)                                                                                                                                                           | 519.28219 | 73.02824 (C3H5O2-), 113.05991 (C6H9O2-), 127.07569 (C7H11O2-), 261.13422 (C12H21O6-), 275.14981 (C13H23O6-)                                                                                                                                                                                                                                                                                                                                                                                                                                             |
| ascr | ubas#19 | 6.36 | 315.15500 | 57.03430 (C3H5O+), 69.03418 (C4H5O+), 95.04958 (C6H7O+), 113.05995 (C6H9O2+),                                                                                                                                                                                                                                                              | 431.20350 | 59.02386 (CH3N2O-), 73.02825 (C3H5O2-), 85.02833 (C4H5O2-),                                                                                                                                                                                                                                                                                                                                                                                                                                                                                             |

|      |         |      |           |                                                                                                                                                                                                                                                                                                                                                                                                     |           |                                                                                                                                                                                                                                                                                                                                                                                                                                                                                                           |
|------|---------|------|-----------|-----------------------------------------------------------------------------------------------------------------------------------------------------------------------------------------------------------------------------------------------------------------------------------------------------------------------------------------------------------------------------------------------------|-----------|-----------------------------------------------------------------------------------------------------------------------------------------------------------------------------------------------------------------------------------------------------------------------------------------------------------------------------------------------------------------------------------------------------------------------------------------------------------------------------------------------------------|
|      |         |      |           | 129.06590 (C5H9N2O2+), 141.09082 (C8H13O2+), 169.08582 (C9H13O3+), 255.12251 (C13H19O5+), 259.12848 (C11H19N2O5+), 298.12836 (C14H20NO6+), 315.15491 (C14H23N2O6+)                                                                                                                                                                                                                                  |           | 99.04417 (C5H7O2-), 102.05508 (C4H8NO2-), 127.05061 (C5H7N2O2-), 129.05496 (C6H9O3-), 145.06137 (C5H9N2O3-), 303.14502 (C14H23O7-), 371.17090 (C18H27O8-), 388.19791 (C18H30NO8-)                                                                                                                                                                                                                                                                                                                         |
| ascr | ubas#20 | 6.53 | 826.39734 | 100.03970 (C4H6NO2+), 103.05465 (C8H7+), 113.05997 (C6H9O2+), 120.08103 (C8H10N+), 129.06590 (C5H9N2O2+), 146.06020 (C9H8NO+), 156.08092 (C11H10N+), 157.06482 (C11H9O+), 174.09148 (C11H12NO+), 184.07574 (C12H10NO+), 202.08629 (C12H12NO2+), 220.09645 (C12H14NO3+), 400.17545 (C22H26NO6+), 417.20221 (C22H29N2O6+), 460.20792 (C23H30N3O7+), 478.21887 (C23H32N3O8+), 578.27087 (C28H40N3O10+) | 824.38226 | 73.02824 (C3H5O2-), 85.02833 (C4H5O2-), 98.02370, (C4H4NO2-), 102.05502 (C4H8NO2-), 127.05061 (C5H7N2O2-), 218.08199 (C12H12NO3-), 247.11868 (C11H19O6-), 315.14481 (C15H23O7-), 375.17725 (C16H27N2O8-)                                                                                                                                                                                                                                                                                                  |
| ascr | pasy#12 | 6.56 | 481.25507 | 91.05465 (C7H7+), 103.05454 (C8H7+), 113.05994 (C6H9O2+), 120.08092 (C8H10N+), 146.05998 (C9H8NO+), 156.08080 (C11H10N+), 174.09129 (C11H12NO+), 184.07564 (C12H10NO+), 202.08618 (C12H12NO2+, major)                                                                                                                                                                                               |           |                                                                                                                                                                                                                                                                                                                                                                                                                                                                                                           |
| ascr | ubas#21 | 6.58 | 649.35498 | 104.07088 (C4H10NO2+), 112.03951 (C5H6NO2+), 113.06001 (C6H9O2+), 115.07561 (C6H11O2+), 129.06590 (C5H9N2O2+), 130.04994 (C5H8NO3+), 147.07639 (C5H11N2O3+), 199.09647 (C10H15O4+), 242.10191 (C11H16NO5+), 259.12869 (C11H19N2O5+), 295.15359 (C16H23O5+), 355.18622 (C17H27N2O6+), 373.19687 (C17H29N2O7+)                                                                                        | 647.33966 | 73.02824 (C3H5O2-), 85.02834 (C4H5O2-), 102.05501 (C4H8NO2-), 113.05993 (C6H9O3-), 127.07570 (C7H11O2-), 257.13962 (C13H21O5-), 261.13425 (C12H21O6-), 275.14978 (C13H23O6-), 343.17657 (C17H27O7-), 519.28101 (C25H43O11-), 587.30743 (C29H47O12-)                                                                                                                                                                                                                                                       |
|      |         | 6.59 | 748.37567 | 151.07533 (C9H11O2+), 154.06238 (C8H10O3+, rad), 169.08585 (C9H13O3+), 182.05730 (C9H10O4+, rad), 197.08081 (C10H13O4+, major), 293.13815 (C16H21O5+)                                                                                                                                                                                                                                               | 729.33517 | 73.02823 (C3H5O2-), 111.04420 (C6H7O2-), 127.07570 (C7H11O2-), 139.03940 (C7H7O3-), 150.03181 (C8H6O3-, rad), 151.03979 (C8H7O3-), 165.05540 (C9H9O3-), 166.02684 (C8H6O4-, rad), 167.03468 (C8H7O4-), 168.04256 (C8H8O4-, rad), 172.05261 (C11H8O2-, rad), 181.05052 (C9H9O4-), 195.06606 (C10H11O4-), 218.09492 (C13H14O3-, rad), 250.12074 (C14H18O4-, rad), 275.14993 (C13H23O6-), 277.10776 (C15H17O5-), 291.12466 (C16H19O5-), 309.13461 (C16H21O6-), 501.21332 (C27H33O9-), 567.28113 (C29H43O11-) |
|      |         | 6.64 | 240.15952 | see growth medium, ES- table                                                                                                                                                                                                                                                                                                                                                                        |           |                                                                                                                                                                                                                                                                                                                                                                                                                                                                                                           |
|      |         | 6.64 | 689.29254 | 92.04993 (C6H6N+), 111.08071 (C7H11O+), 120.04457 (C7H6NO+), 127.03905 (C6H7O3+), 129.09109 (C7H13O2+), 132.04431 (C8H6NO+), 138.05507 (C7H8NO2+), 180.06548 (C9H10NO3+), 246.07584 (C13H12NO4+), 248.12796 (C14H18NO3+), 264.08643 (C13H14NO5+), 282.09702 (C13H16NO6+), 392.17044 (C20H26NO7+), 410.18091 (C20H28NO8+)                                                                            |           |                                                                                                                                                                                                                                                                                                                                                                                                                                                                                                           |
| ascr | ubas#22 | 6.70 | 840.41309 | 100.03970 (C4H6NO2+), 103.05465 (C8H7+), 113.05997 (C6H9O2+), 120.08103 (C8H10N+), 129.06590 (C5H9N2O2+), 146.06020 (C9H8NO+), 156.08092 (C11H10N+), 157.06482 (C11H9O+),                                                                                                                                                                                                                           | 838.29791 | 73.02834 (C3H5O2-), 85.02844 (C4H5O2-), 98.02380 (C4H4NO2-), 102.05511 (C4H8NO2-), 113.05997 (C6H9O2-), 127.05063 (C5H7N2O2-),                                                                                                                                                                                                                                                                                                                                                                            |

|      |         |      |           |                                                                                                                                                                                                                                                                                                                                                                                                                                                                                  |                         |                                                                                                                                                                                   |
|------|---------|------|-----------|----------------------------------------------------------------------------------------------------------------------------------------------------------------------------------------------------------------------------------------------------------------------------------------------------------------------------------------------------------------------------------------------------------------------------------------------------------------------------------|-------------------------|-----------------------------------------------------------------------------------------------------------------------------------------------------------------------------------|
|      |         |      |           | 174.09148 (C11H12NO+), 184.07574 (C12H10NO+), 202.08629 (C12H12NO2+), 220.09645 (C12H14NO3+), 400.17545 (C22H26NO6+), 417.20221 (C22H29N2O6+), 460.20792 (C23H30N3O7+), 478.21887 (C23H32N3O8+), 592.28656 (C29H42N3O10+)                                                                                                                                                                                                                                                        |                         | 218.08241 (C12H12NO3-), 247.11870 (C11H19O6-), 261.13409 (C12H21O6-), 315.14471 (C15H23O7-), 332.17123 (C15H26NO7-), 375.17719 (C16H27N2O8-)                                      |
|      |         | 6.85 | 289.15445 | 101.02367 (C4H5O3+), 117.07014 (C9H9+), 129.05466 (C6H9O3+), 143.07283 (C7H11O3+), 144.08076 (C10H10N+, major), 161.10722 (C10H13N2+), 243.11264 (C14H15N2O2+)                                                                                                                                                                                                                                                                                                                   |                         |                                                                                                                                                                                   |
| ascr | pasy#1  | 6.88 | 495.27020 | 91.05466 (C7H7+), 103.05456 (C8H7+), 113.06003 (C6H9O2+), 120.08096 (C8H10N+), 146.06000 (C9H8NO+), 156.08075 (C11H10N+), 174.09137 (C11H12NO+), 184.07564 (C12H10NO+), 202.08624 (C12H12NO2+, major)                                                                                                                                                                                                                                                                            |                         |                                                                                                                                                                                   |
| ascr | ubas#23 | 6.91 | 865.45435 | 104.07088 (C4H10NO2+), 112.03951 (C5H6NO2+), 113.06001 (C6H9O2+), 115.07561 (C6H11O2+), 129.06590 (C5H9N2O2+), 130.04994 (C5H8NO3+), 147.07639 (C5H11N2O3+), 199.09647 (C10H15O4+), 242.10191 (C11H16NO5+), 259.12869 (C11H19N2O5+), 281.13821 (C15H21O5+), 341.17062 (C16H25N2O6+), 359.18127 (C16H27N2O7+)                                                                                                                                                                     |                         |                                                                                                                                                                                   |
| ascr | ubas#24 | 7.14 | 879.46985 | 104.07088 (C4H10NO2+), 112.03951 (C5H6NO2+), 113.06001 (C6H9O2+), 115.07561 (C6H11O2+), 129.06590 (C5H9N2O2+), 130.04994 (C5H8NO3+), 147.07639 (C5H11N2O3+), 199.09647 (C10H15O4+), 242.10191 (C11H16NO5+), 259.12869 (C11H19N2O5+), 295.15359 (C16H23O5+), 355.18622 (C17H27N2O6+), 373.19687 (C17H29N2O7+)                                                                                                                                                                     |                         |                                                                                                                                                                                   |
| ascr |         | 7.14 | 782.45349 | 111.08079 (C7H11O+), 113.06005 (C6H9O2+), 129.09106 (C7H13O2+), 147.10152 (C7H5O3+), 183.13800 (C11H19O2+), 241.14357 (C13H21O4+), 259.15414 (C13H23O5+)                                                                                                                                                                                                                                                                                                                         | 763.41299               | 73.02822 (C3H5O2-), 111.04437 (C6H7O2-), 127.07571 (C7H11O2-), 145.08650 (C7H13O3-), 275.14981 (C13H23O6-), 313.16589 (C16H25O6-), 505.26605 (C24H41O11-), 533.29700 (C26H45O11-) |
|      |         | 7.19 | 592.23932 | 120.04462 (C7H6NO+), 138.05502 (C7H8NO2+), 151.07547 (C9H11O2+), 154.06247 (C8H10O3+, rad), 169.08588 (C9H13O3+), 182.05743 (C9H10O4+, rad), 197.08096 (C10H13O4+), 228.06566 (C13H10NO3+), 293.13812 (C16H21O5+)                                                                                                                                                                                                                                                                |                         |                                                                                                                                                                                   |
|      |         | 7.25 | 309.13330 | see J2, ES+ table                                                                                                                                                                                                                                                                                                                                                                                                                                                                | 307.11880               | 137.02379 (C7H5O3-), 165.01906 (C8H5O4-), 180.04272 (C9H8O4-, rad), 195.06618 (C10H11O4-)                                                                                         |
| ascr |         | 7.33 | 673.29669 | 92.04996 (C6H6N+), 113.05995 (C6H9O2+), 120.04461 (C7H6NO+, major), 127.03910 (C6H7O3+), 129.09113 (C7H13O2+), 132.04446 (C8H6NO+), 138.05499 (C7H8NO2+), 172.07559 (C11H10NO+), 180.06546 (C9H10NO3+), 214.08633 (C13H12NO2+), 232.09679 (C13H14NO3+), 246.07600 (C13H12NO4+), 248.12796 (C14H18NO3+), 250.10699 (C13H16NO4+), 264.08679 (C13H14NO5+), 282.09689 (C13H16NO6+), 392.17035 (C20H26NO7+), 410.18082 (C20H28NO8+), 522.23236 (C26H36NO10+), 540.24353 (C26H38NO11+) | 707.25889               | 73.02821 (C3H5O2-), 136.03966 (C7H6NO2-), 275.14999 (C13H23O6-)                                                                                                                   |
|      |         | 7.35 | 809.56207 | see comments                                                                                                                                                                                                                                                                                                                                                                                                                                                                     | 439.24710,<br>449.27560 |                                                                                                                                                                                   |
|      |         | 7.38 | 763.43427 |                                                                                                                                                                                                                                                                                                                                                                                                                                                                                  |                         |                                                                                                                                                                                   |
| ascr | ubas#25 | 7.41 | 893.48523 | 83.08607 (C6H11+), 111.08073 (C7H11O+), 113.06001 (C6H9O2+), 129.06590                                                                                                                                                                                                                                                                                                                                                                                                           |                         |                                                                                                                                                                                   |

|      |        |       |           |                                                                                                                                                                                                                                                                                                                                                                                                                                                                                   |           |                                                                                                                                                                                                            |
|------|--------|-------|-----------|-----------------------------------------------------------------------------------------------------------------------------------------------------------------------------------------------------------------------------------------------------------------------------------------------------------------------------------------------------------------------------------------------------------------------------------------------------------------------------------|-----------|------------------------------------------------------------------------------------------------------------------------------------------------------------------------------------------------------------|
|      |        |       |           | (C5H9N2O2+), 147.07646 (C5H11N2O3+), 199.09648 (C10H15O4+), 259.12878 (C11H19N2O5+), 309.16943 (C17H25O5+), 327.17978 (C17H27O6+), 387.21259 (C18H31N2O7+)                                                                                                                                                                                                                                                                                                                        |           |                                                                                                                                                                                                            |
|      |        | 7.57  | 590.22327 | 81.03409 (C5H5O+), 97.02873 (C5H5O2+), 109.02865 (C6H5O2+), 120.04456 (C7H6NO+), 127.03915 (C6H7O3+), 138.05487 (C7H8NO2+), 146.02365 (C8H4NO2+), *195.10150 (C11H15O3+), *197.08087 (C10H15O4+), *199.07541 (C13H11O2+), *217.08582 (C13H13O3+), 228.06534 (C13H10NO3+), *231.10146 (C14H15O3+), *259.09622 (C15H15O4+), *263.12750 (C15H19O4+), *291.12247 (C16H19O5+), 309.13315 (C16H21O6+), 417.15475 (C22H25O8+), 435.16476 (C22H27O9+); (* fragments present in 309.13324) |           |                                                                                                                                                                                                            |
| ascr | tasc#1 | 7.61  | 810.48486 | see growth medium, ES- table                                                                                                                                                                                                                                                                                                                                                                                                                                                      |           |                                                                                                                                                                                                            |
|      |        | 7.62  | 671.31781 | 105.07025 (C8H9+), 120.08096 (C8H10N+), 202.08669 (C12H12NO2+), 204.10181 (C12H14NO2+), 220.09677 (C12H14NO3+), 222.11235 (C12H16NO3+)                                                                                                                                                                                                                                                                                                                                            | 669.30331 |                                                                                                                                                                                                            |
|      |        | 8.03  | 545.47784 | 237.22112 (C16H29O+), 255.23164 (C16H31O2+)                                                                                                                                                                                                                                                                                                                                                                                                                                       |           |                                                                                                                                                                                                            |
| ascr |        | 8.08  | 586.32245 | 151.07542 (C9H11O2+), 154.06252 (C8H10O3+, rad), 169.08588 (C9H13O3+), 182.05725 (C9H10O4+, rad), 197.08092 (C10H13O4+), 293.13824 (C16H21O5+)                                                                                                                                                                                                                                                                                                                                    | 567.28195 | 73.02826 (C3H5O2-), 127.07575 (C7H11O2-), 150.03191 (C8H6O3-, rad), 151.03966 (C8H7O3-), 165.05551 (C9H9O3-), 167.03479 (C8H7O4-), 168.04265 (C8H8O4-, rad), 275.14999 (C13H23O6-), 535.25525 (C28H39O10-) |
|      |        | 8.19  | 252.63503 |                                                                                                                                                                                                                                                                                                                                                                                                                                                                                   |           |                                                                                                                                                                                                            |
|      |        | 8.51  | 704.29645 | 134.04654 (C5H4N5+), 165.02296 (C6H5N4S+), 182.04956 (C6H8N5S+), 194.04962 (C7H8N5S+), 250.11203 (C11H16N5S+)                                                                                                                                                                                                                                                                                                                                                                     | 702.28195 |                                                                                                                                                                                                            |
| ascr |        | 8.57  | 584.30707 | 83.04971 (C5H7O+), 111.04443 (C6H7O2+), 113.05998 (C6H9O2+), 195.10184 (C11H15O3+), 197.08078 (C10H13O4+), 199.07579 (C13H11O2+), 217.08589 (C13H13O3+), 231.10155 (C14H15O3+), 259.09637 (C15H15O4+), 263.12762 (C15H19O4+), 277.10699 (C15H17O5+), 291.12259 (C16H19O5+), 309.13318 (C16H21O6+), 331.15421 (C19H23O5+), 389.15906 (C21H25O7+), 421.18558 (C22H29O8+)                                                                                                            | 565.26657 | 73.02825 (C3H5O2-), 127.07575 (C7H11O2-), 137.02380 (C7H5O3-), 165.01907 (C8H5O4-), 166.02692 (C8H6O4-, rad), 180.04277 (C9H8O4-, rad), 181.05055 (C9H9O4-), 195.06619 (C10H11O4-), 275.15005 (C13H23O6-)  |
| ascr |        | 8.91  | 844.46948 | 113.06007 (C6H9O2+), 129.09114 (C7H13O2+), 151.07542 (C9H11O2+), 154.06244 (C8H10O3+, rad), 169.08580 (C9H13O3+), 182.05734 (C9H10O4+, rad), 197.08087 (C10H13O4+), 293.13818 (C16H21O5+)                                                                                                                                                                                                                                                                                         | 825.42898 | 73.02825 (C3H5O2-), 127.07559 (C7H11O2-), 139.03940 (C7H7O3-), 151.03940 (C8H7O3-), 167.03464 (C8H7O4-), 275.14981 (C13H23O6-), 533.29694 (dasc#1-), 793.40314 (C41H61O15-)                                |
|      |        | 8.93  | 702.28046 | 134.04654 (C5H4N5+), 165.02296 (C6H5N4S+), 182.04956 (C6H8N5S+), 194.04962 (C7H8N5S+), 250.11203 (C11H16N5S+)                                                                                                                                                                                                                                                                                                                                                                     |           |                                                                                                                                                                                                            |
|      |        | 9.64  | 770.46881 | 92.04996 (C6H6N+), 120.04459 (C7H6NO+), 138.05495 (C7H8NO2+), 248.12828 (C14H18NO3+), 264.08643 (C13H14NO5+), 282.09714 (C13H16NO6+), 392.17029 (C20H26NO7+), 410.18091 (C20H28NO8+)                                                                                                                                                                                                                                                                                              |           |                                                                                                                                                                                                            |
|      |        | 10.14 | 474.32181 | 91.05473 (C7H7+), 119.04942 (C8H7O+), 151.07539 (C9H11O2+), 250.10728 (C13H16NO4+)                                                                                                                                                                                                                                                                                                                                                                                                |           |                                                                                                                                                                                                            |
|      |        | 11.18 | 481.34277 | 144.08083 (C10H10N+), 156.08084 (C11H10N+), 243.11270 (C14H15N2O2+), 261.12341 (C14H17N2O3+), 382.31079                                                                                                                                                                                                                                                                                                                                                                           |           |                                                                                                                                                                                                            |

|  |  |       |           |              |  |  |
|--|--|-------|-----------|--------------|--|--|
|  |  |       |           | (C26H40NO+)  |  |  |
|  |  | 13.97 | 445.40402 | see comments |  |  |
|  |  | 14.34 | 459.41959 | see comments |  |  |

**Table S14. Differential metabolites from *P. pacificus* J2 medium, ES- mode, that are decreased or absent in RS2333 medium compared to RS2770 *Ppa-daf-22*.** Entries that have a corresponding peak in the ES+ table are shaded grey.

| class | rt (min) | m/z (ES-) | MS/MS (ES-)                                                                                                                                             | m/z (ES+) | MS/MS (ES+)                                                                               |
|-------|----------|-----------|---------------------------------------------------------------------------------------------------------------------------------------------------------|-----------|-------------------------------------------------------------------------------------------|
|       | 4.91     | 325.97858 | see comments                                                                                                                                            |           |                                                                                           |
|       | 4.91     | 243.12390 | 85.06474 (C6H9O-), 163.11259 (C11H15O-), 181.12338 (C11H17O2-), 199.13402 (C11H19O3-), 207.10269 (C12H15O3-), 225.11330 (C12H17O4-)                     |           |                                                                                           |
|       | 4.94     | 305.16074 | 59.01267 (C2H3O2-), 169.12321 (C10H17O2-), 171.10243 (C9H15O3-), 231.12366 (C11H19O5-)                                                                  |           |                                                                                           |
|       | 5.22     | 215.16550 |                                                                                                                                                         |           |                                                                                           |
|       | 5.51     | 289.20248 | 59.01258 (C2H3O2-), 229.18105 (C13H25O3-)                                                                                                               |           |                                                                                           |
|       | 5.71     | 301.20248 | 59.01258 (C2H3O2-), 241.18158 (C14H25O3-)                                                                                                               |           |                                                                                           |
|       | 5.95     | 303.21808 | 59.01257 (C2H3O2-), 243.19644 (C14H27O3-)                                                                                                               |           |                                                                                           |
|       | 5.96     | 421.24487 | 59.01259 (C2H3O2-, major), 71.01261 (C3H3O2-), 73.02825 (C3H5O2-), 83.01273 (C4H3O2-), 85.02836 (C4H5O2-), 101.02344 (C4H5O3-), 113.02362 (C5H5O3-)     |           |                                                                                           |
| S     | 5.97     | 515.21716 | 59.01252 (C2H3O2-), 96.95906 (HSO4-), 353.16391 (C15H29SO7-)                                                                                            |           |                                                                                           |
| S     | 6.04     | 339.18475 | 96.95906 (HSO4-)                                                                                                                                        |           |                                                                                           |
|       | 6.21     | 427.21051 | 59.01254 (C2H3O2-), 78.95783 (PO3-), 96.96854 (H2PO4-), 293.15286 (C13H26PO5-), 317.15231 (C15H26PO5-), 335.16373 (C15H28PO6-), 409.19943 (C18H34PO8-)  |           |                                                                                           |
| S     | 6.48     | 353.16422 | 59.01255 (C2H3O2-), 96.95901 (HSO4-), 213.18600 (C13H25O2-), 273.20718 (C15H29O4-), 291.16360 (C14H27SO4-), 293.14294 (C13H25SO5-)                      |           |                                                                                           |
|       | 6.70     | 569.31000 | 78.95787 (PO3-), 96.96854 (H2PO4-)                                                                                                                      |           |                                                                                           |
| ascr  | 6.81     | 461.31259 | 59.01259 (C2H3O2-), 73.02829 (C3H5O2-)                                                                                                                  |           |                                                                                           |
|       | 6.84     | 315.21790 | 59.01256 (C2H3O2-), 85.06470 (C5H9O-), 115.07560 (C6H11O2-), 223.13402 (C13H19O3-), 241.14441 (C13H21O4-), 255.19650 (C15H27O3-), 297.20734 (C17H29O4-) |           |                                                                                           |
| S     | 6.90     | 293.14315 | 96.95601 (HSO4-)                                                                                                                                        |           |                                                                                           |
| S     | 6.98     | 409.19031 | 59.01258 (C2H3O2-), 79.95618 (SO3-), 96.95906 (HSO4-), 329.23340 (C18H33O5-), 347.18964 (C17H31SO5-), 349.16904 (C16H29SO6-)                            |           |                                                                                           |
|       | 6.99     | 461.27621 | 59.01260 (C2H3O2-, major), 71.01255 (C3H3O2-), 73.02822 (C3H5O2-), 83.01260 (C4H3O2-), 85.02822 (C4H5O2-), 101.02342 (C4H5O3-)                          |           |                                                                                           |
|       | 7.34     | 259.19138 | 59.01256 (C2H3O2-), 199.17041 (C12H29O2-)                                                                                                               | 243.19543 |                                                                                           |
|       | 7.41     | 447.26028 | 59.01256 (C2H3O2-, major), 71.01257 (C3H3O2-), 73.02827 (C3H5O2-), 83.01264 (C4H3O2-), 85.02834 (C4H5O2-), 101.02340 (C4H5O3-), 113.02355 (C5H5O3-)     |           |                                                                                           |
| S     | 7.44     | 307.15847 | 96.95905 (HSO4-)                                                                                                                                        |           |                                                                                           |
|       | 7.47     | 419.26532 | 59.01258 (C2H3O2-), 71.01259 (C3H3O2-), 73.02824 (C3H5O2-), 85.02828 (C4H5O2-), 101.02335 (C4H5O3-), 257.21225 (C15H29O3-)                              |           |                                                                                           |
|       | 7.62     | 327.21799 | 155.10748 (C9H15O2-), 171.10255 (C9H15O3-)                                                                                                              |           |                                                                                           |
|       | 7.65     | 525.32037 |                                                                                                                                                         |           |                                                                                           |
| S     | 7.72     | 467.26859 | 59.01258 (C2H3O2-), 96.96905 (HSO4-), 327.29092 (C20H39O3-), 387.31192 (C22H43O5-), 405.26840 (C21H41SO5-), 407.24741 (C20H39SO6-)                      |           |                                                                                           |
|       | 7.87     | 273.20728 | 59.01258 (C2H3O2-, major), 213.18622 (C13H25O2-)                                                                                                        |           |                                                                                           |
| S     | 8.01     | 341.11972 | 96.95901 (HSO4-), 305.14285 (C14H25SO5-)                                                                                                                |           |                                                                                           |
|       | 8.06     | 271.19171 | 59.01258 (C2H3O2-)                                                                                                                                      |           |                                                                                           |
| ascr  | 8.07     | 503.35956 | 59.01258 (C2H3O2-), 73.02826 (C3H5O2-), 83.04912 (C5H7O-), 111.04434 (C6H7O2-), 313.27481 (C19H37O3-)                                                   | 505.37378 | 303.26807 (C21H35O+), 321.27896 (C21H37O2+), 339.28909 (C21H39O3+), 357.29959 (C21H41O4+) |
| S     | 8.16     | 481.28439 | 59.01257 (C2H3O2-), 96.96906 (HSO4-), 341.30609 (C21H41O3-), 401.32706 (C23H45O5-), 419.28345 (C22H43SO5-), 421.26300 (C21H41SO6-)                      |           |                                                                                           |
| ascr  | 8.49     | 517.37506 | 59.01258 (C2H3O2-), 73.02830 (C3H5O2-), 111.04440 (C6H7O2-), 327.29080 (C20H39O3-)                                                                      | 519.38934 | 317.28400 (C22H37O+), 335.29456 (C22H39O2+), 353.30545 (C22H41O3+)                        |
| ascr  | 8.95     | 531.39105 | 59.01259 (C2H3O2-), 73.02827 (C3H5O2-), 83.04907 (C5H7O-), 111.04420 (C6H7O2-), 341.30603 (C21H41O3-)                                                   |           |                                                                                           |
| ascr  | 8.95     | 445.31757 | 59.01262 (C2H3O2-), 73.02830 (C3H5O2-), 83.04909 (C5H7O-),                                                                                              |           |                                                                                           |

|      |       |           |                                                                                                                                  |           |                                                                                           |
|------|-------|-----------|----------------------------------------------------------------------------------------------------------------------------------|-----------|-------------------------------------------------------------------------------------------|
|      |       |           | 111.04427 (C6H7O2-), 255.23259 (C16H31O2-), 385.29572 (C22H41O5-)                                                                |           |                                                                                           |
| ascr | 11.51 | 719.46021 | 59.01256 (C2H3O2-), 71.01259 (C3H3O2-), 73.02826 (C3H5O2-), 83.04903 (C5H7O-), 111.04431 (C6H7O2-), 511.40039 (C30H55O6-, major) |           |                                                                                           |
|      | 11.64 | 559.38599 | 335.33194 (C23H43O-), 379.32175 (C24H43O3-), 397.33215 (C24H45O4-)                                                               | 578.42694 | 335.33081 (C23H43O+), 353.34134 (C23H45O2+), 381.33542 (C24H45O3+), 399.34692 (C24H47O4+) |
| ascr | 12.57 | 747.49139 | 59.01260 (C2H3O2-), 71.01261 (C3H3O2-), 73.02826 (C3H5O2-), 83.04904 (C5H7O-), 111.04421 (C6H7O2-), 539.43158 (C32H59O6-, major) |           |                                                                                           |
| ascr | 14.08 | 527.43207 | 71.01266 (C3H3O2-), 73.02832 (C3H5O2-), 83.04916 (C5H7O-), 111.04440 (C6H7O2-), 379.35822 (C25H47O2-), 397.36859 (C25H49O3-)     |           |                                                                                           |

**Table S15. Differential metabolites from *P. pacificus* growth medium, ES- mode, that are decreased or absent in RS2333 medium compared to RS2770 *Ppa-daf-22*.** Entries that have a corresponding peak in the ES+ table are shaded grey.

| class | smid-db    | rt (min) | m/z (ES-) | MS/MS (ES-)                                                                                                                                                                                                                                                   | m/z (ES+) | MS/MS (ES+)                                                                                                                                                                                                                                                                                                                                                                                       |
|-------|------------|----------|-----------|---------------------------------------------------------------------------------------------------------------------------------------------------------------------------------------------------------------------------------------------------------------|-----------|---------------------------------------------------------------------------------------------------------------------------------------------------------------------------------------------------------------------------------------------------------------------------------------------------------------------------------------------------------------------------------------------------|
|       |            | 4.71     | 262.14514 | 91.05419 (C7H7-), 116.04967 (C8H6N-), 117.07011 (C9H9-), 118.06541 (C8H8N-), 143.04971 (C10H7O-), 162.05576 (C9H8NO2-), 201.12849 (C14H17O-), 245.11810 (C15H17O3-)                                                                                           | 264.15961 | 91.05468 (C7H7+), 118.06532 (C8H8N+), 120.08092 (C8H10N+), 134.09641 (C9H12N+), 164.07048 (C9H10NO2+), 218.15387 (C14H20NO+)                                                                                                                                                                                                                                                                      |
| S     |            | 4.83     | 355.17981 | 79.95612 (SO3-), 96.95904 (HSO4-)                                                                                                                                                                                                                             | 357.19431 | 223.20566 (C15H27O+), 241.21605 (C15H29O2+), 259.22662 (C15H31O3+)                                                                                                                                                                                                                                                                                                                                |
| S     |            | 5.21     | 383.17496 | 59.01264 (C2H3O2-), 96.95904 (HSO4-), 243.19624 (C14H27O3-), 303.21768 (C16H31O5-), 321.17398 (C15H29SO5-), 323.15326 (C14H27SO6-)                                                                                                                            |           |                                                                                                                                                                                                                                                                                                                                                                                                   |
|       |            | 5.25     | 537.19592 | 72.00785 (C2H2NO2-), 74.02358 (C2H4NO2-), 100.00299 (C3H2NO3-), 118.05016 (C4H8NO3-), 144.02969 (C6H2N5- or C5H6NO4-), *160.02620 (C6H5N5O-); (*) only in the 1st peak                                                                                        | 539.21042 | 136.06183 (C5H6N5+), 162.04099 (C6H4N5O+), 281.09915 (C10H13N6O4+), 407.16733 (C17H23N6O6+)                                                                                                                                                                                                                                                                                                       |
|       | phesad#1,2 | 5.31     | 614.22247 | 1st peak: 72.00787 (C2H2NO2-), 74.02351 (C2H4NO2-), 100.00301 (C3H2NO3-), 118.05018 (C4H8NO3-), 144.02980 (C6H2N5- or C5H6NO4-), 160.02621 (C6H5N5O-); 2nd peak: 98.02369 (C4H4NO2-), 202.08746 (C12H12NO2-), 220.09796 (C12H14NO3-), 321.14569 (C16H21N2O5-) | 616.23676 | 1st peak: 97.02882 (C5H5O2+), 136.06177 (C5H6N5+), 162.04095 (C6H4N5O+), 281.09909 (C10H13N6O4+), 318.13339 (C17H20NO5+); 2nd peak: 105.07020 (C8H9+), 138.05490 (C7H8NO2+), 156.06546 (C7H10NO3+), 162.04091 (C6H4N5O+), 166.04984 (C8H8NO3+), 184.06036 (C8H10NO4+), 204.10188 (C12H14NO2+), 263.08853 (C10H11N6O3+), 305.14938 (C16H21N2O4+), 323.15991 (C16H23N2O5+), 484.19366 (C22H26N7O6+) |
| S     |            | 5.34     | 369.19571 | 96.95902 (HSO4-)                                                                                                                                                                                                                                              |           |                                                                                                                                                                                                                                                                                                                                                                                                   |
| S     |            | 5.38     | 327.11230 | 96.95917 (HSO4-)                                                                                                                                                                                                                                              |           |                                                                                                                                                                                                                                                                                                                                                                                                   |
|       |            | 5.59     | 260.15054 | 74.02354 (C2H4NO2-), 84.04434 (C4H6NO-), 98.02377 (C4H4NO2-), 104.03442 (C3H6NO3-), 116.03461 (C4H6NO3-), 146.04556 (C5H8NO4-), 230.13992 (C11H20NO4-)                                                                                                        | 262.16504 |                                                                                                                                                                                                                                                                                                                                                                                                   |
| S     |            | 5.64     | 265.11172 | 96.95906 (HSO4-)                                                                                                                                                                                                                                              |           |                                                                                                                                                                                                                                                                                                                                                                                                   |
|       |            | 5.72     | 506.14349 | 78.95786 (PO3-), 96.96859 (H2PO4-), 148.96413 (C3H2PO5-), 223.00146 (C6H8PO7-), 241.01205 (C6H10PO8-), 369.09586 (C13H22PO10-), 378.05957 (C13H17NPO10-)                                                                                                      |           |                                                                                                                                                                                                                                                                                                                                                                                                   |
| S     |            | 5.74     | 326.12009 | 78.95785 (PO3-)                                                                                                                                                                                                                                               | 328.13459 | 75.02694 (C3H7S+), 230.15727 (C12H24NSO+)                                                                                                                                                                                                                                                                                                                                                         |
| S     |            | 5.77     | 353.16425 | *59.01257 (C2H3O2-), 96.95894 (HSO4-), *213.18594 (C13H25O2-), 273.20721 (C15H29O4-), *291.16354 (C14H27SO4-), *293.14273 (C13H25SO5-); (*) only in 6.1-6.2 min peaks                                                                                         |           |                                                                                                                                                                                                                                                                                                                                                                                                   |
|       |            | 5.86     | 231.16026 | 59.01258 (C2H3O2-), 171.13896 (C10H19O2-)                                                                                                                                                                                                                     |           |                                                                                                                                                                                                                                                                                                                                                                                                   |
| S     |            | 5.88     | 501.23776 | 96.95898 (HSO4-), 321.17398 (C15H29SO5-), 339.18466 (C15H31SO6-)                                                                                                                                                                                              |           |                                                                                                                                                                                                                                                                                                                                                                                                   |
|       |            | 5.89     | 339.14865 | 2nd peak: 96.05905 (HSO4-), 59.01258 (C2H3O2-), 259.19128 (C14H27O4-), 277.14771 (C13H25SO4-), 279.12701 (C12H23SO5-)                                                                                                                                         |           |                                                                                                                                                                                                                                                                                                                                                                                                   |
|       |            | 5.90     | 383.18427 | 78.95786 (PO3-), 96.96859 (H2PO4-)                                                                                                                                                                                                                            |           |                                                                                                                                                                                                                                                                                                                                                                                                   |
| S     |            | 5.92     | 325.16934 | 96.95909 (HSO4-)                                                                                                                                                                                                                                              |           |                                                                                                                                                                                                                                                                                                                                                                                                   |
|       |            | 6.01     | 303.21802 | 59.01266 (C2H3O2-), 171.13881                                                                                                                                                                                                                                 | 305.23252 |                                                                                                                                                                                                                                                                                                                                                                                                   |



|   |  |      |           |                                                                                                                                                                                                                                                                        |           |                                                                                                                                                                                                                                                                                                                                                                    |
|---|--|------|-----------|------------------------------------------------------------------------------------------------------------------------------------------------------------------------------------------------------------------------------------------------------------------------|-----------|--------------------------------------------------------------------------------------------------------------------------------------------------------------------------------------------------------------------------------------------------------------------------------------------------------------------------------------------------------------------|
|   |  |      |           | (C10H19O2-), 185.15445 (C11H12O2-),<br>243.19641 (C14H27O3-)                                                                                                                                                                                                           |           |                                                                                                                                                                                                                                                                                                                                                                    |
|   |  | 6.03 | 281.15240 | 78.95786 (PO3-)                                                                                                                                                                                                                                                        |           |                                                                                                                                                                                                                                                                                                                                                                    |
|   |  | 6.09 | 455.18277 | 84.00805 (C3H2NO2-), 98.02377<br>(C4H4NO2-, main), 112.03960<br>(C5H6NO2-), 218.08224 (C12H12NO3-),<br>236.09285 (C12H14NO4-)                                                                                                                                          | 457.19751 | 101.02366 (C4H5O3+), 103.05452<br>(C8H7+), 120.08089 (C8H10N+),<br>146.05998 (C9H8NO+), 156.08073<br>(C11H10N+), 174.09123<br>(C11H12NO+), 184.07556<br>(C12H10NO+), 202.08612<br>(C12H12NO2+), 220.09668<br>(C12H14NO3+)                                                                                                                                          |
| S |  | 6.20 | 279.12717 | 96.95909 (HSO4-)                                                                                                                                                                                                                                                       |           |                                                                                                                                                                                                                                                                                                                                                                    |
| S |  | 6.20 | 353.20041 | 96.95905 (HSO4-)                                                                                                                                                                                                                                                       | 372.24091 | 239.23676 (C16H31O+),<br>257.24728 (C16H33O2+),<br>275.25793 (C16H35O3+)                                                                                                                                                                                                                                                                                           |
|   |  | 6.28 | 272.15054 | 72.00786 (C2H2NO2-), 74.02351<br>(C2H4NO2-), 104.03435 (C3H6NO3-),<br>112.03949 (C5H6NO2-), 130.01372<br>(C4H4NO4-), 141.12796 (C9H17O-),<br>180.13937 (C11H18NO-), 242.13985<br>(C12H20NO4-)                                                                          |           |                                                                                                                                                                                                                                                                                                                                                                    |
|   |  | 6.34 | 716.18707 | 78.95783 (PO3-), 92.04948 (C6H6N-),<br>96.96855 (H2PO4-), 98.02369<br>(C4H4NO2-), 136.03979 (C7H6NO2-),<br>148.96419 (C3H2PO5-), 218.08224<br>(C12H12NO3-), 223.00133 (C6H8PO7-),<br>236.09312 (C12H14NO4-), 442.09055<br>(C18H21NPO10-), 579.13934<br>(C25H28N2PO12-) | 718.20157 | 103.05465 (C8H7+), 120.08099<br>(C8H10N+), 127.03903 (C6H7O3+),<br>143.03401 (C6H7O4+), 146.05991<br>(C9H8NO+), 156.08102<br>(C11H10N+), 174.09132<br>(C11H12NO+), 184.07582<br>(C12H10NO+), 202.08632<br>(C12H12NO2+), 220.09680<br>(C12H14NO3+), 262.10745<br>(C14H16NO4+), 328.11807<br>(C18H18NO5+), 346.12848<br>(C18H20NO6+)                                 |
| S |  | 6.37 | 339.18448 | 96.95905 (HSO4-)                                                                                                                                                                                                                                                       |           |                                                                                                                                                                                                                                                                                                                                                                    |
|   |  | 6.38 | 433.19989 | 78.95783 (PO3-), 96.96855 (H2PO4-)                                                                                                                                                                                                                                     | 435.21439 |                                                                                                                                                                                                                                                                                                                                                                    |
|   |  | 6.39 | 679.19122 | 78.95785 (PO3-)                                                                                                                                                                                                                                                        | 681.20572 | 1st peak: 105.07027 (C8H9+),<br>120.08101 (C8H10N+), 146.06013<br>(C9H8NO+), 183.07625<br>(C8H11N2O3+), 204.10197<br>(C12H14NO2+); 2nd peak:<br>120.08097 (C8H10N+), 202.08623<br>(C12H12NO2+), 328.11795<br>(C18H18NO5+), 346.12845<br>(C18H20NO6+)                                                                                                               |
|   |  | 6.39 | 490.14890 |                                                                                                                                                                                                                                                                        | 492.16340 |                                                                                                                                                                                                                                                                                                                                                                    |
|   |  | 6.51 | 681.20752 | 78.95779 (PO3-), 136.03993 (C7H6NO2-<br>, 148.96431 (C3H2PO5-), 223.00121<br>(C6H8PO7-), 442.09048 (C18H21NPO10-<br>, 544.15948 (C23H31NPO12-)                                                                                                                         | 683.22202 | 103.05449 (C8H7+), 109.02869<br>(C6H5O2+), 120.08091 (C8H10N+),<br>127.03893 (C6H7O3+), 156.08086<br>(C11H10N+), 174.09131<br>(C11H12NO+), 184.07600<br>(C12H10NO+), 202.08623<br>(C12H12NO2+), 220.09679<br>(C12H14NO3+), 262.10663<br>(C14H16NO4+), 328.11755<br>(C18H18NO5+), 346.12836<br>(C18H20NO6+), 430.18597<br>(C23H28NO7+), 528.16199<br>(C23H31NPO11+) |
| S |  | 6.68 | 293.14319 | 96.95909 (HSO4-)                                                                                                                                                                                                                                                       |           |                                                                                                                                                                                                                                                                                                                                                                    |
| S |  | 6.71 | 367.17947 | 59.01259 (C2H3O2-), 96.95898 (HSO4-),<br>287.22290 (C16H31O4-), 305.17926<br>(C15H29SO4-), 307.15875 (C14H27SO5-),<br>309.17374 (C14H29SO5-)                                                                                                                           |           |                                                                                                                                                                                                                                                                                                                                                                    |
| S |  | 6.71 | 409.19016 | 59.01256 (C2H3O2-), 79.95615 (SO3-),<br>96.95903 (HSO4-), 155.10718 (C9H15O2-<br>, 207.06949 (C8H15SO4-), 215.12903<br>(C11H19O4-), 235.06493 (C9H15SO5-),<br>311.22299 (C18H31O4-), 329.23346<br>(C18H33O5-), 347.18970 (C17H31SO5-),<br>349.16901 (C16H29SO6-)       |           |                                                                                                                                                                                                                                                                                                                                                                    |
|   |  | 6.76 | 363.19418 | 78.95782 (PO3-), 96.96853 (H2PO4-)                                                                                                                                                                                                                                     | 365.20868 | 267.23169 (C17H31O2+)                                                                                                                                                                                                                                                                                                                                              |

|      |  |      |           |                                                                                                                                                                                                                                                                                                      |           |                                                                                                                                                                  |
|------|--|------|-----------|------------------------------------------------------------------------------------------------------------------------------------------------------------------------------------------------------------------------------------------------------------------------------------------------------|-----------|------------------------------------------------------------------------------------------------------------------------------------------------------------------|
|      |  | 7.16 | 387.19424 | 78.95783 (PO3-), 96.96855 (H2PO4-)                                                                                                                                                                                                                                                                   | 389.20874 |                                                                                                                                                                  |
|      |  | 7.36 | 403.22531 | 78.95786 (PO3-), 96.96851 (H2PO4-), 385.21561 (C20H34PO5-)                                                                                                                                                                                                                                           |           |                                                                                                                                                                  |
|      |  | 7.62 | 333.18332 | 78.95783 (PO3-), 96.96855 (H2PO4-)                                                                                                                                                                                                                                                                   | 335.19782 |                                                                                                                                                                  |
| S    |  | 7.68 | 363.18478 | 79.95628 (SO3-), 96.95913 (HSO4-), 207.06972 (C8H15SO4-), 249.08029 (C10H17SO5-)                                                                                                                                                                                                                     |           |                                                                                                                                                                  |
|      |  | 7.95 | 693.24384 | 78.95785 (PO3-), 92.04948 (C6H6N-), 96.96854 (H2PO4-), 98.02382 (C4H4NO2-), 136.03990 (C7H6NO2-), 148.96414 (C3H2PO5-), 202.08759 (C12H12NO2-), 220.09807 (C12H14NO3-), 223.00159 (C6H8PO7-), 426.09634 (C18H21NPO9-), 444.10687 (C18H23NPO10-), 556.19562 (C25H35NPO11-), 581.15302 (C25H30N2PO12-) |           |                                                                                                                                                                  |
| ascr |  | 8.19 | 539.29938 | 59.01258 (C2H3O2-), 78.95785 (PO3-), 96.96854 (H2PO4-), 209.02216 (C6H10PO6-)                                                                                                                                                                                                                        |           |                                                                                                                                                                  |
|      |  | 8.27 | 349.21518 | 78.95785 (PO3-), 96.96854 (H2PO4-)                                                                                                                                                                                                                                                                   | 351.22968 |                                                                                                                                                                  |
| S    |  | 8.37 | 675.41864 | 96.95901 (HSO4-)                                                                                                                                                                                                                                                                                     |           |                                                                                                                                                                  |
|      |  | 8.47 | 287.22305 | 59.01255 (C2H3O2-), 227.20172 (C14H27O2-)                                                                                                                                                                                                                                                            | 289.23755 |                                                                                                                                                                  |
| S    |  | 8.55 | 347.19022 | 96.95904 (HSO4-)                                                                                                                                                                                                                                                                                     |           |                                                                                                                                                                  |
|      |  | 8.72 | 635.40228 | 59.01258 (C2H3O2-), 71.01259 (C3H3O2-), 73.02824 (C3H5O2-), 85.02831 (C4H5O2-), 101.02331 (C4H5O3-), 113.02348 (C5H5O3-), 247.17030 (C16H32O2-), 299.22290 (C17H31O4-), 335.22302 (C20H31O4-)                                                                                                        | 654.44278 | 249.25749 (C18H33+), 267.26807 (C18H35O+), 273.25751 (C20H33+), 291.26794 (C20H35O+), 309.27838 (C20H37O2+), 327.28918 (C20H39O3+), 345.29990 (C20H41O4+)        |
| ascr |  | 8.73 | 553.31543 | 59.01258 (C2H3O2-), 78.95785 (PO3-), 96.96854 (H2PO4-), 209.02216 (C6H10PO6-)                                                                                                                                                                                                                        | 555.32993 | 211.03668 (C6H12PO6+), 267.26807 (C18H35O+), 291.26831 (C20H35O+), 309.27869 (C20H37O2+), 327.28915 (C20H39O3+)                                                  |
| S    |  | 8.89 | 363.22137 | 96.95904 (HSO4-)                                                                                                                                                                                                                                                                                     |           |                                                                                                                                                                  |
|      |  | 8.89 | 301.23862 | 59.01262 (C2H3O2-), 241.21727 (C15H29O2-)                                                                                                                                                                                                                                                            |           |                                                                                                                                                                  |
|      |  | 8.91 | 513.22607 | 83.01268 (C4H3O2-), 315.19659 (C20H27O3-)                                                                                                                                                                                                                                                            | 479.26387 |                                                                                                                                                                  |
| S    |  | 8.91 | 351.22128 | 96.95908 (HSO4-)                                                                                                                                                                                                                                                                                     |           |                                                                                                                                                                  |
|      |  | 8.93 | 385.29611 | see comments                                                                                                                                                                                                                                                                                         | 387.31061 |                                                                                                                                                                  |
|      |  | 8.93 | 359.28055 |                                                                                                                                                                                                                                                                                                      |           |                                                                                                                                                                  |
| ascr |  | 8.94 | 531.39044 | 59.01259 (C2H3O2-), 73.02827 (C3H5O2-), 83.04910 (C5H7O-), 111.04434 (C6H7O2-), 341.30606 (C21H41O3-), 471.36911 (C27H51O6-), 513.37927 (C29H53O7-)                                                                                                                                                  | 533.40494 |                                                                                                                                                                  |
|      |  | 8.94 | 337.23871 | 59.01259 (C2H3O2-)                                                                                                                                                                                                                                                                                   |           |                                                                                                                                                                  |
| S    |  | 8.94 | 377.20062 | 96.95910 (HSO4-), 183.13878 (C11H19O2-), 297.24332 (C18H33O3-)                                                                                                                                                                                                                                       |           |                                                                                                                                                                  |
| ascr |  | 8.94 | 445.31720 | 59.01258 (C2H3O2-), 73.02825 (C3H5O2-), 83.04906 (C5H7O-), 111.04426 (C6H7O2-), 255.23299 (C16H31O2-), 385.29578 (C22H41O5-), 427.30646 (C24H43O6-)                                                                                                                                                  |           |                                                                                                                                                                  |
|      |  | 8.97 | 624.25842 | 179.14406 (C12H19O-), 223.13402 (C13H19O3-)                                                                                                                                                                                                                                                          | 590.29622 | 105.07022 (C8H9+), 204.10191 (C12H14NO2+), 222.11235 (C12H16NO3+), 225.14845 (C13H21O3+), 330.13330 (C18H20NO5+), 348.14413 (C18H22NO6+), 366.15485 (C18H24NO7+) |
|      |  | 9.03 | 313.23862 | 1st peak: 59.01259 (C2H3O2-, major), 99.08060 (C6H11O-), 129.09145 (C7H13O2-), 183.13899 (C11H19O2-); 2nd peak: 59.01259 (C2H3O2-, major), 139.11230 (C9H15O-); 3rd peak: 59.01259 (C2H3O2-, major), 99.08055                                                                                        | 315.25312 |                                                                                                                                                                  |

|      |  |      |           |                                                                                                                                                                                                                                                                                                   |           |                                                                                                                                                           |
|------|--|------|-----------|---------------------------------------------------------------------------------------------------------------------------------------------------------------------------------------------------------------------------------------------------------------------------------------------------|-----------|-----------------------------------------------------------------------------------------------------------------------------------------------------------|
|      |  |      |           | (C6H11O-), 253.21727 (C16H29O2-)                                                                                                                                                                                                                                                                  |           |                                                                                                                                                           |
|      |  | 9.05 | 557.38116 | 70.02860 (C3H4NO-), 73.02827 (C3H5O2-), 96.00805 (C4H2NO2-), 113.03478 (C4H5N2O2-), 114.01889 (C4H4NO3-), 131.04562 (C4H7N2O3-), 294.28058 (C19H36NO-), 299.22314 (C17H31O4-), 312.29120 (C19H38NO2-), 539.36987 (C29H51N2O7-)                                                                    |           |                                                                                                                                                           |
|      |  | 9.06 | 473.23950 | 221.19110 (C15H25O-), 223.17035 (C14H23O2-), 265.18085 (C16H25O3-)                                                                                                                                                                                                                                |           |                                                                                                                                                           |
|      |  | 9.09 | 374.29156 | 59.01259 (C2H3O2-), 328.28632 (C19H38NO3-)                                                                                                                                                                                                                                                        |           |                                                                                                                                                           |
|      |  | 9.16 | 649.41772 |                                                                                                                                                                                                                                                                                                   |           |                                                                                                                                                           |
| ascr |  | 9.29 | 567.33087 | 78.95786 (PO3-), 96.96858 (H2PO4-), 209.02220 (C6H10PO6-)                                                                                                                                                                                                                                         | 569.34537 | 211.03659 (C6H12PO6+), 263.27322 (C19H35+), 281.28378 (C19H37O+), 287.27365 (C21H35+), 305.28397 (C21H37O+), 323.29428 (C21H39O2+), 341.30502 (C21H41O3+) |
|      |  | 9.31 | 257.21246 |                                                                                                                                                                                                                                                                                                   |           |                                                                                                                                                           |
|      |  | 9.36 | 267.19678 | 99.08057 (C6H11O-), 205.19635 (C15H25-)                                                                                                                                                                                                                                                           | 269.21128 |                                                                                                                                                           |
|      |  | 9.39 | 545.40631 | 59.01259 (C2H3O2-), 73.02828 (C3H5O2-), 341.30676 (C21H41O3-)                                                                                                                                                                                                                                     | 547.42081 | 345.31500 (C24H41O+), 363.32535 (C24H43O2+), 381.33627 (C24H45O3+)                                                                                        |
|      |  | 9.44 | 399.31171 | 59.01258 (C2H3O2-)                                                                                                                                                                                                                                                                                | 401.32621 |                                                                                                                                                           |
|      |  | 9.50 | 499.25537 | 59.01262 (C2H3O2-), 71.01260 (C3H3O2-), 89.02328 (C3H5O3-), 101.02344 (C4H5O3-), 113.02354 (C5H5O3-), 247.20692 (C17H27O-), 291.19672 (C18H27O3-)                                                                                                                                                 |           |                                                                                                                                                           |
| ascr |  | 9.51 | 459.33325 | 59.01258 (C2H3O2-), 73.02825 (C3H5O2-), 83.04906 (C5H7O-), 111.04426 (C6H7O2-), 269.24881 (C17H33O2-)                                                                                                                                                                                             |           |                                                                                                                                                           |
| ascr |  | 9.54 | 661.41791 | 59.01260 (C2H3O2-), 73.02826 (C3H5O2-), 83.04905 (C5H7O-), 111.04420 (C6H7O2-), 309.28009 (C20H37O2-), 325.31119 (C21H41O2-), 455.37424 (C27H51O5-), 499.36420 (C28H51O7-)                                                                                                                        | 680.45841 |                                                                                                                                                           |
|      |  | 9.56 | 571.39697 | 58.02855 (C2H4NO-), 70.02858 (C3H4NO-), 73.02825 (C3H5O2-), 96.00804 (C4H2NO2-), 113.03481 (C4H5N2O2-), 114.01881 (C4H4NO3-), 131.04555 (C4H7N2O3-), 292.26456 (C19H34NO-), 306.28052 (C20H36NO-), 308.29666 (C20H38NO-), 326.30661 (C20H40NO2-), 456.36880 (C26H50NO5-), 553.38666 (C30H53N2O7-) |           |                                                                                                                                                           |
|      |  | 9.57 | 605.39172 |                                                                                                                                                                                                                                                                                                   | 624.43222 |                                                                                                                                                           |
| S    |  | 9.57 | 422.25070 |                                                                                                                                                                                                                                                                                                   | 388.28850 | 75.02692 (C3H7S+), 261.22113 (C18H29O+), 304.26331 (C20H34NO+), 322.27380 (C20H36NO2+), 352.26666 (C21H38NSO+), 370.27725 (C21H40NSO2+)                   |
|      |  | 9.61 | 339.25436 | 59.01257 (C2H3O2-, main), 113.09641 (C7H13O-), 165.12837 (C11H17O-), 321.24377 (C20H33O4-)                                                                                                                                                                                                        |           |                                                                                                                                                           |
| ascr |  | 9.67 | 663.43311 | 59.01256 (C2H3O2-), 71.01259 (C3H3O2-), 85.02834 (C4H5O2-), 101.02341 (C4H5O3-), 113.02361 (C5H5O3-), 645.42188 (C34H61O11-)                                                                                                                                                                      | 682.47375 | 277.28876 (C20H37+), 295.29932 (C20H39O+), 301.28885 (C22H37+), 319.29941 (C22H39O+), 337.30997 (C22H41O2+), 355.32043 (C22H43O3+), 373.33087 (C22H45O4+) |
|      |  | 9.68 | 830.52301 |                                                                                                                                                                                                                                                                                                   |           |                                                                                                                                                           |
|      |  | 9.68 | 780.54041 | 267.23297 (C17H31O2-), 464.27826 (C22H43NPO7-)                                                                                                                                                                                                                                                    |           |                                                                                                                                                           |
|      |  | 9.88 | 315.25430 | 59.01257 (C2H3O2-), 255.23308 (C16H31O2-)                                                                                                                                                                                                                                                         |           |                                                                                                                                                           |

|      |  |       |           |                                                                                                                                                                                                                                                                                                                                                                                             |           |                                                                                                                                                                                                                                                                                                                                                                                                                                                                                                                                                  |
|------|--|-------|-----------|---------------------------------------------------------------------------------------------------------------------------------------------------------------------------------------------------------------------------------------------------------------------------------------------------------------------------------------------------------------------------------------------|-----------|--------------------------------------------------------------------------------------------------------------------------------------------------------------------------------------------------------------------------------------------------------------------------------------------------------------------------------------------------------------------------------------------------------------------------------------------------------------------------------------------------------------------------------------------------|
| ascr |  | 9.99  | 725.42590 | 73.02826 (C3H5O2-), 83.04905 (C5H7O-), 111.04420 (C6H7O2-), 353.34268 (C23H45O2-), 483.40588 (C29H55O5-), 527.39545 (C30H55O7-)                                                                                                                                                                                                                                                             | 708.48975 | 9.89 min: 289.28891 (C21H37+), 317.32007 (C23H41+), 345.31512 (C24H41O+), 363.32574 (C24H43O2+); 10.44 min: 233.18999 (C16H25O+), 277.21597 (C18H29O2+), 303.30457 (C22H39+), 321.24231 (C20H33O3+), 345.31430 (C24H41O+), 363.32556 (C24H43O2+), 381.33640 (C24H45O3+); 10.62 and 10.68 min: 289.28879 (C21H37+), 307.29932 (C21H39O+), 345.31430 (C24H41O+), 363.32556 (C24H43O2+), 381.33640 (C24H45O3+); 10.82 and 10.88 min: 289.28879 (C21H37+), 307.29932 (C21H39O+), 363.32556 (C24H43O2+), 381.33640 (C24H45O3+), 399.34662 (C24H47O4+) |
|      |  | 10.00 | 341.26993 | 59.01257 (C2H3O2-)                                                                                                                                                                                                                                                                                                                                                                          |           |                                                                                                                                                                                                                                                                                                                                                                                                                                                                                                                                                  |
|      |  | 10.07 | 585.41260 | 1st peak: 73.02831 (C3H5O2-), 109.03986 (C5H5N2O-), 127.05058 (C5H7N2O2-), 145.06140 (C5H9N2O3-), 393.34906 (C24H45N2O2-); 2nd peak: 70.02860 (C3H4NO-), 73.02827 (C3H5O2-), 96.00805 (C4H2NO2-), 114.01885 (C4H4NO3-), 131.04556 (C4H7N2O3-), 306.27991 (C20H36NO-), 320.29584 (C21H38NO-), 322.31171 (C21H40NO-), 340.32217 (C21H42NO2-), 470.38571 (C27H52NO5-), 567.40100 (C31H55N2O7-) | 587.42710 | 1st peak: 129.06592 (C5H9N2O2+), 130.04988 (C5H8NO3+), 147.07634 (C5H11N2O3+), 439.35269 (C25H47N2O4+)                                                                                                                                                                                                                                                                                                                                                                                                                                           |
| ascr |  | 10.09 | 581.34662 | 78.95783 (PO3-), 96.96855 (H2PO4-), 209.02213 (C6H10PO6-)                                                                                                                                                                                                                                                                                                                                   | 583.36112 | 211.03670 (C6H12PO6+), 277.28891 (C20H37+), 295.29950 (C20H39O+), 301.28879 (C22H37+), 319.29980 (C22H39O+), 337.31030 (C22H41O2+), 355.32037 (C22H43O3+)                                                                                                                                                                                                                                                                                                                                                                                        |
| ascr |  | 10.17 | 677.44861 | 59.01259 (C2H3O2-), 71.01259 (C3H3O2-), 73.02824 (C3H5O2-), 85.02833 (C4H5O2-), 101.02332 (C4H5O3-), 113.02345 (C5H5O3-)                                                                                                                                                                                                                                                                    | 696.48914 | 291.30435 (C21H39+), 309.31503 (C21H41O+), 315.30453 (C23H39+), 333.31494 (C23H41O+), 351.32556 (C23H43O2+), 369.33630 (C23H45O3+), 387.34702 (C23H47O4+)                                                                                                                                                                                                                                                                                                                                                                                        |
|      |  | 10.18 | 473.34872 | 59.01260 (C2H3O2-), 73.02826 (C3H5O2-), 83.04905 (C5H7O-), 111.04420 (C6H7O2-), 283.26422 (C18H35O2-), 413.32745 (C24H45O5-), 455.33817 (C26H47O6-)                                                                                                                                                                                                                                         | 492.38922 | 249.25754 (C18H33+), 267.26807 (C18H35O+), 273.25751 (C20H33+), 291.26804 (C20H35O+), 309.27869 (C20H37O2+), 327.28922 (C20H39O3+)                                                                                                                                                                                                                                                                                                                                                                                                               |
|      |  | 10.24 | 491.24237 | 249.22238 (C17H29O-), 251.20169 (C16H27O2-), 293.21246 (C18H29O3-)                                                                                                                                                                                                                                                                                                                          | 457.28017 | 295.22672 (C18H31O3+)                                                                                                                                                                                                                                                                                                                                                                                                                                                                                                                            |
|      |  | 10.34 | 503.28690 | 83.01271 (C4H3O2-), 295.22775 (C18H31O3-)                                                                                                                                                                                                                                                                                                                                                   | 459.29590 |                                                                                                                                                                                                                                                                                                                                                                                                                                                                                                                                                  |
| ascr |  | 10.58 | 487.36447 | 59.01256 (C2H3O2-), 73.02823 (C3H5O2-), 83.04904 (C5H7O-), 111.04424 (C6H7O2-), 297.27982 (C19H37O2-), 427.34311 (C25H47O5-), 469.35345 (C27H49O6-)                                                                                                                                                                                                                                         | 506.40527 | 263.27307 (C19H35+), 291.28366 (C19H37O+), 287.27310 (C21H35+), 305.28354 (C21H37O+), 323.29419 (C21H39O2+), 341.30478 (C21H41O3+)                                                                                                                                                                                                                                                                                                                                                                                                               |
| ascr |  | 10.58 | 737.47083 | 73.02826 (C3H5O2-, main), 325.31134 (C21H41O2-), 455.37424 (C27H51O5-), 529.41095 (C30H57O7-)                                                                                                                                                                                                                                                                                               | 710.50494 | 291.30426 (C21H39+), 309.31506 (C21H41O+), 329.32022 (C24H41+), 347.33072 (C24H43O+), 365.34149 (C24H45O2+), 383.35181 (C24H47O3+), 401.36224 (C24H49O4+)                                                                                                                                                                                                                                                                                                                                                                                        |

|      |  |       |           |                                                                                                                                                                                                                                                                                                                                                                     |           |                                                                                                                                                                                                                                  |
|------|--|-------|-----------|---------------------------------------------------------------------------------------------------------------------------------------------------------------------------------------------------------------------------------------------------------------------------------------------------------------------------------------------------------------------|-----------|----------------------------------------------------------------------------------------------------------------------------------------------------------------------------------------------------------------------------------|
| ascr |  | 10.62 | 507.30951 | 78.95783 (PO3-), 96.96855 (H2PO4-)                                                                                                                                                                                                                                                                                                                                  | 509.32401 | 211.03656 (C6H12PO6+), 263.27313 (C19H35+), 281.28372 (C19H37O+)                                                                                                                                                                 |
|      |  | 10.63 | 343.28574 | 59.01257 (C2H3O2-), 283.26434 (C18H35O2-)                                                                                                                                                                                                                                                                                                                           |           |                                                                                                                                                                                                                                  |
| ascr |  | 10.66 | 639.38892 |                                                                                                                                                                                                                                                                                                                                                                     | 622.45288 | 277.28876 (C20H37+), 295.29929 (C20H39O+); 2nd peak also has 313.30991 (C20H41O2+)                                                                                                                                               |
| ascr |  | 10.69 | 537.32037 | 78.95783 (PO3-), 96.96857 (H2PO4-), 209.02222 (C6H10PO6-)                                                                                                                                                                                                                                                                                                           | 539.33487 | 113.06002 (C6H9O2+), 211.03665 (C6H12PO6+), 275.27356 (C20H35+), 293.28381 (C20H37O+), 311.29385 (C20H39O2+)                                                                                                                     |
| ascr |  | 10.71 | 681.39966 | 483.36929 (C28H51O6-)                                                                                                                                                                                                                                                                                                                                               | 664.46346 | 319.29941 (C22H39O+), 337.30988 (C22H41O2+)                                                                                                                                                                                      |
| ascr |  | 10.79 | 529.41119 | 1st peak: 73.02827 (C3H5O2-), 399.34814 (C24H47O4-); 2nd and 3rd peaks: 73.02827 (C3H5O2-, main); 4th peak: 59.01257 (C2H3O2-, main), 73.02823 (C3H5O2-), 83.04904 (C5H7O-), 111.04424 (C6H7O2-), 339.32684 (C22H43O2-), 469.38995 (C28H53O5-), 511.40085 (C30H55O6-)                                                                                               | 531.42569 | 2nd and 3rd peaks: 309.31497 (C21H41O+), 329.31985 (C24H41+), 347.33066 (C24H43O+), 365.34146 (C24H45O2+); 4th peak: 305.32007 (C22H41+), 323.33060 (C22H43O+), 329.31967 (C24H41+), 347.33105 (C24H43O+), 365.34155 (C24H45O2+) |
| ascr |  | 10.92 | 693.44373 | 355.32211 (C22H43O3-), 485.38556 (C28H53O6-)                                                                                                                                                                                                                                                                                                                        | 666.47873 | 321.31509 (C22H41O+), 339.32581 (C22H43O2+)                                                                                                                                                                                      |
|      |  | 11.06 | 369.30115 | 59.01257 (C2H3O2-), 309.28046 (C20H37O2-)                                                                                                                                                                                                                                                                                                                           |           |                                                                                                                                                                                                                                  |
| ascr |  | 11.07 | 703.46478 | 73.02823 (C3H5O2-), 83.04904 (C5H7O-), 111.04424 (C6H7O2-), 367.35794 (C24H47O2-), 497.42142 (C30H57O5-), 541.41138 (C31H57O7-)                                                                                                                                                                                                                                     |           |                                                                                                                                                                                                                                  |
|      |  | 11.12 | 613.44366 | 1st peak: 73.02827 (C3H5O2-), 109.03986 (C5H5N2O-), 127.05059 (C5H7N2O2-), 145.06123 (C5H9N2O3-), 421.38019 (C26H49N2O2-); 2nd peak: 70.02860 (C3H4NO-), 73.02836 (C3H5O2-), 96.00813 (C4H2NO2-), 114.01888 (C4H4NO3-), 131.04559 (C4H7N2O3-), 334.31137 (C22H40NO-), 348.32715 (C23H42NO-), 350.34302 (C23H44NO-), 368.35339 (C23H46NO2-), 595.43219 (C33H59N2O7-) | 615.45816 |                                                                                                                                                                                                                                  |
| ascr |  | 11.13 | 501.38013 | 59.01259 (C2H3O2-, main), 71.01263 (C3H3O2-), 73.02828 (C3H5O2-), 83.04910 (C5H7O-), 111.04433 (C6H7O2-), 311.29605 (C20H39O2-), 441.35944 (C26H49O5-), 483.36813 (C28H51O6-)                                                                                                                                                                                       | 503.39465 | 277.28864 (C20H37+), 295.29922 (C20H39O+), 301.28864 (C22H37+), 319.29929 (C22H39O+), 337.30991 (C22H41O2+), 355.32031 (C22H43O3+)                                                                                               |
|      |  | 11.19 | 397.30746 | 73.03945 (C2H5N2O-), 130.08653 (C6H12NO2-), 143.11835 (C7H15N2O-), 187.10893 (C8H15N2O3-), 226.21767 (C14H28NO-), 266.21240 (C16H28NO2-), 353.31763 (C21H41N2O2-)                                                                                                                                                                                                   |           |                                                                                                                                                                                                                                  |
|      |  | 11.20 | 565.35181 | 367.32227 (C23H43O3-)                                                                                                                                                                                                                                                                                                                                               | 548.41561 |                                                                                                                                                                                                                                  |
|      |  | 11.37 | 641.47571 | 73.02831 (C3H5O2-), 109.03984 (C5H5N2O-), 127.05057 (C5H7N2O2-), 128.03456 (C5H6NO3-), 145.06151 (C5H9N2O3-), 449.41101 (C28H53N2O2-)                                                                                                                                                                                                                               | 643.49011 | 129.06598 (C5H9N2O2+), 130.04996 (C5H8NO3+), 147.07648 (C5H11N2O3+), 495.41556 (C29H55N2O4+), 513.42761 (C29H57N2O5+)                                                                                                            |
|      |  | 11.50 | 787.44684 |                                                                                                                                                                                                                                                                                                                                                                     |           |                                                                                                                                                                                                                                  |
| ascr |  | 11.51 | 709.43085 | 73.02823 (C3H5O2-), 83.04904 (C5H7O-), 111.04424 (C6H7O2-), 511.40039 (C30H55O6-)                                                                                                                                                                                                                                                                                   | 692.49469 | 291.30438 (C21H39+), 319.33585 (C23H43+), 329.32010 (C24H41+), 347.33069 (C24H43O+), 365.34128 (C24H45O2+)                                                                                                                       |
|      |  | 11.53 | 383.31683 | 59.01259 (C2H3O2-)                                                                                                                                                                                                                                                                                                                                                  |           |                                                                                                                                                                                                                                  |
|      |  | 11.57 | 371.31689 | 59.01259 (C2H3O2-)                                                                                                                                                                                                                                                                                                                                                  |           |                                                                                                                                                                                                                                  |
| ascr |  | 11.61 | 457.35400 | 73.02823 (C3H5O2-), 327.29065 (C20H39O3-)                                                                                                                                                                                                                                                                                                                           |           |                                                                                                                                                                                                                                  |
| ascr |  | 11.66 | 765.50146 | 73.02823 (C3H5O2-, main), 557.44226                                                                                                                                                                                                                                                                                                                                 | 738.53646 | 319.33600 (C23H43+), 337.34692                                                                                                                                                                                                   |

|      |  |       |           |                                                                                                                                                                                                                                                                                                                                                                                                |           |                                                                                                                                           |
|------|--|-------|-----------|------------------------------------------------------------------------------------------------------------------------------------------------------------------------------------------------------------------------------------------------------------------------------------------------------------------------------------------------------------------------------------------------|-----------|-------------------------------------------------------------------------------------------------------------------------------------------|
|      |  |       |           | (C32H6107-)                                                                                                                                                                                                                                                                                                                                                                                    |           | (C23H450+), 357.35135<br>(C26H45+), 375.36212<br>(C26H470+), 393.37250<br>(C26H4902+), 411.38321<br>(C26H5103+), 429.39420<br>(C26H5304+) |
| ascr |  | 11.67 | 515.39551 | 59.01263 (C2H3O2-, main), 73.02823 (C3H5O2-), 83.04904 (C5H7O-), 111.04424 (C6H7O2-), 325.31146 (C21H4102-)                                                                                                                                                                                                                                                                                    | 534.43719 | 291.30435 (C21H39+), 309.31488 (C21H410+), 315.30414 (C23H39+), 333.31497 (C23H410+), 351.32535 (C23H4302+), 369.33606 (C23H4503+)        |
|      |  | 11.68 | 579.36743 | 381.33746 (C24H4503-)                                                                                                                                                                                                                                                                                                                                                                          | 567.38733 | 185.04196 (C6H1005Na+), 405.33371 (C24H4603Na+)                                                                                           |
| ascr |  | 11.69 | 557.44257 | 11.67 - 11.80 min: 73.02827 (C3H5O2-), 409.36914 (C26H4903-), 427.37970 (C26H5104-); 12.94 and 13.05 min: 73.02826 (C3H5O2-), 111.04430 (C6H7O2-), 353.34299 (C23H4502-); 13.19 min: 59.01257 (C2H3O2-, main), 73.02823 (C3H5O2-), 83.04904 (C5H7O-), 111.04424 (C6H7O2-), 367.35941 (C24H4702-); 13.39 min: 73.02823 (C3H5O2-), 83.04904 (C5H7O-), 111.04424 (C6H7O2-), 381.37427 (C25H4902-) | 581.43884 |                                                                                                                                           |
| ascr |  | 11.77 | 711.44617 | 73.02790 (C3H5O2-), 383.35321 (C24H4703-), 513.41626 (C30H5706-)                                                                                                                                                                                                                                                                                                                               | 694.51080 | 331.33572 (C24H43+), 349.34637 (C24H450+), 367.35690 (C24H4702+)                                                                          |
|      |  | 11.91 | 397.33255 | 59.01258 (C2H3O2-)                                                                                                                                                                                                                                                                                                                                                                             |           |                                                                                                                                           |
| ascr |  | 12.12 | 471.36945 | 73.02827 (C3H5O2-), 341.30612 (C21H4103-)                                                                                                                                                                                                                                                                                                                                                      |           |                                                                                                                                           |
| ascr |  | 12.55 | 737.46240 | 73.02823 (C3H5O2-), 83.04904 (C5H7O-), 111.04424 (C6H7O2-), 539.43182 (C32H5906-)                                                                                                                                                                                                                                                                                                              | 720.52612 | 319.33588 (C23H43+), 347.36722 (C25H47+), 357.35162 (C26H45+), 375.36215 (C26H470+), 393.37265 (C26H4902+)                                |
| ascr |  | 12.61 | 485.38525 | 73.02828 (C3H5O2-), 337.31149 (C22H4102-), 355.32196 (C22H4303-)                                                                                                                                                                                                                                                                                                                               |           |                                                                                                                                           |
| ascr |  | 12.69 | 643.35297 |                                                                                                                                                                                                                                                                                                                                                                                                |           |                                                                                                                                           |
| ascr |  | 12.70 | 497.38541 | 73.02823 (C3H5O2-), 83.04904 (C5H7O-), 111.04424 (C6H7O2-)                                                                                                                                                                                                                                                                                                                                     |           |                                                                                                                                           |
| ascr |  | 12.80 | 739.47815 | 73.2825 (C3H5O2-), 411.38498 (C26H5103-), 541.44745 (C32H6106-)                                                                                                                                                                                                                                                                                                                                | 722.54144 | 359.36719 (C26H47+), 377.37781 (C26H490+), 395.38840 (C26H5102+)                                                                          |
| ascr |  | 13.09 | 499.40103 | 73.02823 (C3H5O2-), 83.04904 (C5H7O-), 111.04424 (C6H7O2-), 351.32697 (C23H4302-), 369.33743 (C23H4503-)                                                                                                                                                                                                                                                                                       | 371.35159 | 317.32004 (C23H41+), 335.33066 (C23H430+)                                                                                                 |
| ascr |  | 13.10 | 511.40070 | see comments                                                                                                                                                                                                                                                                                                                                                                                   |           |                                                                                                                                           |
| ascr |  | 13.19 | 593.38312 | see comments                                                                                                                                                                                                                                                                                                                                                                                   |           |                                                                                                                                           |
| ascr |  | 13.47 | 513.41626 | see comments                                                                                                                                                                                                                                                                                                                                                                                   |           |                                                                                                                                           |
| ascr |  | 13.69 | 571.45831 | 59.01258 (C2H3O2-, main), 73.02823 (C3H5O2-), 83.04904 (C5H7O-), 111.04424 (C6H7O2-), 381.37387 (C25H4902-), 511.43588 (C31H5905-), 553.44769 (C33H6106-)                                                                                                                                                                                                                                      | 595.45496 |                                                                                                                                           |
| ascr |  | 14.08 | 527.43188 | 73.02827 (C3H5O2-), 379.35855 (C25H4702-), 397.36871 (C25H4903-)                                                                                                                                                                                                                                                                                                                               |           |                                                                                                                                           |
| ascr |  | 14.25 | 585.47430 | 59.01258 (C2H3O2-)                                                                                                                                                                                                                                                                                                                                                                             |           |                                                                                                                                           |
| ascr |  | 14.49 | 539.43207 | 73.02823 (C3H5O2-), 83.04904 (C5H7O-), 111.04424 (C6H7O2-); 2nd (bigger) peak also has 409.36911 (C26H4903-)                                                                                                                                                                                                                                                                                   |           |                                                                                                                                           |
| ascr |  | 14.53 | 541.44763 | 73.02826 (C3H5O2-), 393.37390 (C26H4902-), 411.38440 (C26H5103-)                                                                                                                                                                                                                                                                                                                               |           |                                                                                                                                           |

**Table S16. Differential metabolites from *P. pacificus* J2 medium, ES+ mode, which are decreased or absent in RS2333 medium compared to RS2770 *Ppa-daf-22*.** Entries that have a corresponding peak in the ES- table are shaded grey.

| class | rt (min) | m/z (ES+) | MS/MS (ES+)                                                                                                                                                                                                                                                                                                                             | m/z (ES-) |
|-------|----------|-----------|-----------------------------------------------------------------------------------------------------------------------------------------------------------------------------------------------------------------------------------------------------------------------------------------------------------------------------------------|-----------|
|       | 1.81     | 227.21188 | 84.08137 (C5H10N+), 127.12311 (C7H15N2+)                                                                                                                                                                                                                                                                                                |           |
|       | 3.75     | 228.19603 | 70.06582 (C4H8N+)                                                                                                                                                                                                                                                                                                                       |           |
|       | 4.69     | 330.22775 | 60.08158 (C3H10N+), 85.02898 (C4H5O2+), 123.11700 (C9H15+), 253.14320 (C14H21O4+)                                                                                                                                                                                                                                                       |           |
|       | 4.90     | 209.11752 | 91.05471 (C7H7+), 93.07034 (C7H9+), 105.07021 (C8H9+), 107.04953 (C7H7O+), 111.04430 (C6H7O2+), 113.06002 (C6H9O2+), 115.03898 (C5H7O3+), 117.07011 (C9H9+), 121.06493 (C8H9O+), 125.05984 (C7H9O2+), 131.08556 (C10H11+), 145.10117 (C11H13+), 149.09616 (C10H13O+), 163.11168 (C11H15O+), 173.09612 (C12H13O+), 191.10660 (C12H15O2+) |           |
|       | 5.05     | 268.22708 | 59.04993 (C3H7O+), 70.06580 (C4H8N+), 117.09119 (C6H13O2+)                                                                                                                                                                                                                                                                              |           |
|       | 5.05     | 237.14612 |                                                                                                                                                                                                                                                                                                                                         |           |
|       | 5.38     | 553.22559 | 136.06177 (C5H6N5+), 162.04094 (C6H4N5O+), 281.09906 (C10H13N6O4+)                                                                                                                                                                                                                                                                      |           |
|       | 5.70     | 283.15173 |                                                                                                                                                                                                                                                                                                                                         |           |
|       | 5.74     | 285.16727 |                                                                                                                                                                                                                                                                                                                                         |           |
|       | 5.76     | 320.27957 | 60.04520 (C2H6NO+), 90.05543 (C3H8NO2+), 266.24768 (C17H32NO+), 284.25864 (C17H34NO2+), 302.26859 (C17H36NO3+)                                                                                                                                                                                                                          |           |
|       | 5.80     | 212.20108 | 70.06580 (C4H8N+)                                                                                                                                                                                                                                                                                                                       |           |
| S     | 6.38     | 434.15234 | 56.96559 (CaOH+), 277.14761 (C15H25O2Ca+), 295.15775 (C15H27O3Ca+), 393.12552 (C15H29SO7Ca+)                                                                                                                                                                                                                                            |           |
|       | 6.47     | 304.28458 | 60.04521 (C2H6NO+), 250.25275 (C17H32N+), 268.26328 (C17H34NO+), 286.27380 (C17H36NO2+)                                                                                                                                                                                                                                                 |           |
|       | 6.56     | 239.20064 | 203.17934 (C15H23+), 221.18953 (C15H25O+)                                                                                                                                                                                                                                                                                               |           |
|       | 6.74     | 394.28000 | 197.19002 (C13H25O+)                                                                                                                                                                                                                                                                                                                    |           |
| S     | 6.85     | 364.25153 | 86.06055 (C4H8NO+), 90.03766 (C3H8NS+), 98.06041 (C5H8NO+), 108.04806 (C3H10NSO+), 264.23196 (C17H30NO+), 282.24246 (C17H32NO2+), 300.25320 (C17H34NO3+), 328.23022 (C18H34NSO2+), 346.24072 (C18H36NSO3+)                                                                                                                              |           |
|       | 7.10     | 413.22995 |                                                                                                                                                                                                                                                                                                                                         |           |
|       | 7.20     | 412.30609 | 85.02898 (C4H5O2+)                                                                                                                                                                                                                                                                                                                      |           |
|       | 7.20     | 347.27908 |                                                                                                                                                                                                                                                                                                                                         |           |
|       | 7.26     | 243.19543 |                                                                                                                                                                                                                                                                                                                                         | 259.19138 |
| S     | 7.34     | 262.18344 | 90.03763 (C3H8NS+), 108.04813 (C3H10NSO+), 192.13832 (C12H18NO+), 198.18526 (C12H24NO+, major), 244.17302 (C13H26NSO+)                                                                                                                                                                                                                  |           |
|       | 7.41     | 420.29535 |                                                                                                                                                                                                                                                                                                                                         |           |
|       | 7.60     | 491.35800 | 265.25238 (C18H33O+), 289.25296 (C20H3O+), 307.26321 (C20H35O2+), 325.27411 (C20H37O3+), 411.30875 (C24H43O5+)                                                                                                                                                                                                                          |           |
|       | 7.78     | 502.37393 | 85.02898 (C4H5O2+)                                                                                                                                                                                                                                                                                                                      |           |
|       | 7.78     | 257.21091 |                                                                                                                                                                                                                                                                                                                                         |           |
|       | 7.79     | 524.33490 | 60.08155 (C3H10N+), 86.09694 (C5H12N+), 104.10734 (C5H14NO+), 124.99993 (C2H6PO4+), 184.07323 (C5H15NPO4+), 506.32437 (C25H49NPO7+)                                                                                                                                                                                                     |           |
|       | 7.85     | 434.31131 |                                                                                                                                                                                                                                                                                                                                         |           |
|       | 8.03     | 287.25806 | 233.22620 (C17H29+), 251.23708 (C17H31O+), 269.24734 (C17H33O2+)                                                                                                                                                                                                                                                                        |           |
|       | 8.04     | 407.25571 | 291.26801 (C20H35O+), 309.27878 (C20H37O2+)                                                                                                                                                                                                                                                                                             |           |
|       | 8.05     | 574.43170 | 85.02895 (C4H5O2+), 444.36792 (C25H50NO5+)                                                                                                                                                                                                                                                                                              |           |
|       | 8.06     | 505.37378 | see J2, ES- table                                                                                                                                                                                                                                                                                                                       |           |
|       | 8.07     | 253.21605 | 217.19522 (C16H25+), 235.20601 (C16H25O+)                                                                                                                                                                                                                                                                                               |           |
|       | 8.39     | 453.31863 |                                                                                                                                                                                                                                                                                                                                         |           |
|       | 8.51     | 530.40533 | 60.08159 (C3H10N+), 85.02897 (C4H5O2+, major)                                                                                                                                                                                                                                                                                           |           |
|       | 8.52     | 519.38934 | see J2, ES- table                                                                                                                                                                                                                                                                                                                       |           |
|       | 8.52     | 588.44733 | 60.08158 (C3H10N+), 85.02898 (C4H5O2+), 113.06007 (C6H9O2+), *144.10193 (C7H14NO2+), 381.30011 (C23H41O4+), 458.38397 (C26H52NO5+); (*) 1st peak only                                                                                                                                                                                   |           |
|       | 8.86     | 544.42090 |                                                                                                                                                                                                                                                                                                                                         |           |
|       | 8.86     | 702.47913 | 85.02898 (C4H5O2+), 540.42676 (C31H58NO6+)                                                                                                                                                                                                                                                                                              |           |
|       | 8.89     | 445.35223 |                                                                                                                                                                                                                                                                                                                                         |           |
|       | 8.94     | 602.46307 | 60.08160 (C3H10N+), 85.02898 (C4H5O2+), 113.06005 (C6H9O2+), 144.10191 (C7H14NO2+), 395.31558 (C24H43O4+), 472.39993 (C27H54NO5+)                                                                                                                                                                                                       |           |
|       | 9.22     | 558.43604 | 85.02898 (C4H5O2+)                                                                                                                                                                                                                                                                                                                      |           |
|       | 9.30     | 616.47815 | 60.08157 (C3H10N+), 85.02895 (C4H5O2+), 113.05997 (C6H9O2+), 144.10197 (C7H14NO2+), 409.33170 (C25H45O4+), 486.41519 (C28H56NO5+)                                                                                                                                                                                                       |           |
|       | 9.49     | 309.23987 |                                                                                                                                                                                                                                                                                                                                         |           |
|       | 9.52     | 630.49396 | 60.08157 (C3H10N+), 85.02895 (C4H5O2+), 113.06001 (C6H9O2+), 144.10190 (C7H14NO2+), 423.34619 (C26H47O4+), 500.43112 (C29H58NO5+)                                                                                                                                                                                                       |           |
|       | 9.62     | 295.26306 | 277.25256 (C19H33O+)                                                                                                                                                                                                                                                                                                                    |           |

|      |       |           |                                                                                                                                                                                                                                                    |  |
|------|-------|-----------|----------------------------------------------------------------------------------------------------------------------------------------------------------------------------------------------------------------------------------------------------|--|
| S    | 10.00 | 580.38794 | 60.08154 (C3H10N+), 85.02892 (C4H5O2+), 500.43079 (C29H58NO5+)                                                                                                                                                                                     |  |
|      | 11.63 | 578.42694 | see J2, ES- table                                                                                                                                                                                                                                  |  |
| ascr | 11.79 | 692.49506 | 85.02901 (C4H5O2+), 113.06002 (C6H9O2+), 131.07031 (C6H11O3+), 347.33087 (C24H43O+), 365.34137 (C24H45O2+)                                                                                                                                         |  |
| ascr | 12.00 | 694.51050 | 85.02901 (C4H5O2+), 113.06005 (C6H9O2+), 131.07040 (C6H11O3+), 349.34653 (C24H45O+), 367.35718 (C24H47O2+)                                                                                                                                         |  |
|      | 12.20 | 569.40314 | 185.04205 (C6H10O5Na+), 407.34955 (C24H48O3Na)                                                                                                                                                                                                     |  |
|      | 12.24 | 385.36783 | 349.34641 (C24H45O+)                                                                                                                                                                                                                               |  |
| ascr | 12.56 | 720.52612 | 85.02896 (C4H5O2+), 113.06000 (C6H9O2+), 131.07036 (C6H11O3+), 145.04965 (C6H9O4+), 375.36206 (C26H47O+), 393.37256 (C26H49O2+)                                                                                                                    |  |
|      | 12.64 | 516.42639 | 333.31506 (C23H41O+), 351.32578 (C23H43O2+)                                                                                                                                                                                                        |  |
|      | 12.70 | 415.37823 | 361.34683 (C25H45O+), 379.35663 (C25H47O2+)                                                                                                                                                                                                        |  |
|      | 12.71 | 567.42346 |                                                                                                                                                                                                                                                    |  |
|      | 12.76 | 553.40765 |                                                                                                                                                                                                                                                    |  |
|      | 12.79 | 795.41119 |                                                                                                                                                                                                                                                    |  |
| ascr | 12.81 | 722.54187 | 85.02896 (C4H5O2+), 113.05998 (C6H9O2+), 131.07031 (C6H11O3+), 145.04958 (C6H9O4+), 377.37762 (C26H49O+), 395.38821 (C26H51O2+), 457.40408 (C31H53O2+), 485.39835 (C32H53O3+), 503.40921 (C32H55O4+), 521.41998 (C32H57O5+), 539.43091 (C32H59O6+) |  |
|      | 12.97 | 611.44952 |                                                                                                                                                                                                                                                    |  |
|      | 13.07 | 353.34119 |                                                                                                                                                                                                                                                    |  |
|      | 13.07 | 535.39716 |                                                                                                                                                                                                                                                    |  |
|      | 13.14 | 595.41821 | 433.36670 (C26H50O3Na+)                                                                                                                                                                                                                            |  |
|      | 13.20 | 581.43903 |                                                                                                                                                                                                                                                    |  |
|      | 13.22 | 565.40771 |                                                                                                                                                                                                                                                    |  |
|      | 13.69 | 595.45483 | 465.39206 (C27H54O4Na+)                                                                                                                                                                                                                            |  |
|      | 13.77 | 637.46533 |                                                                                                                                                                                                                                                    |  |
|      | 14.04 | 593.43927 |                                                                                                                                                                                                                                                    |  |
|      | 14.07 | 595.45477 |                                                                                                                                                                                                                                                    |  |
|      | 14.17 | 521.41797 |                                                                                                                                                                                                                                                    |  |
|      | 14.40 | 577.44415 |                                                                                                                                                                                                                                                    |  |



**Table S17. Differential metabolites from *P. pacificus* growth medium, ES+ mode, that are decreased or absent in RS2333 medium compared to RS2770 *Ppa-daf-22*.** Entries that have a corresponding peak in the ES- table are shaded grey.

| class | rt (min) | m/z (ES+) | MS/MS (ES+)                                                                                                                                                                                                                                                                                                                                                                                                                                                                                                                                                             |
|-------|----------|-----------|-------------------------------------------------------------------------------------------------------------------------------------------------------------------------------------------------------------------------------------------------------------------------------------------------------------------------------------------------------------------------------------------------------------------------------------------------------------------------------------------------------------------------------------------------------------------------|
|       | 1.41     | 215.21175 | 84.08131 (C5H10N+), 86.09692 (C5H12N+), 98.09678 (C6H12N+), 115.12318 (C6H15N2+), 198.18513 (C12H24NO+)                                                                                                                                                                                                                                                                                                                                                                                                                                                                 |
|       | 3.26     | 322.14948 | 94.06552 (C6H8N+), 96.08115 (C6H10N+), 100.03961 (C4H6NO2+), 102.05526 (C4H8NO2+), 103.03926 (C4H7O3+), 112.07576 (CC6H10NO+), 114.09156 (C6H12NO+), 117.05482 (C5H9O3+), 118.08642 (C5H12NO2+), 124.07586 (C7H10NO+), 131.03392 (C5H7O4+), 142.08620 (C7H12NO2+), 145.04958 (C6H9O4+), 156.10188 (C8H14NO2+), 174.11234 (C8H16NO3+), 202.10733 (C9H16NO4+), 216.12297 (C10H18NO4+), 262.12827 (C11H20NO6+), 276.14389 (C12H22NO6+)                                                                                                                                     |
|       | 3.76     | 243.20668 | 84.08131 (C5H10N+), 114.09158 (C6H12NO+), 143.11786 (C7H15N2O+)                                                                                                                                                                                                                                                                                                                                                                                                                                                                                                         |
|       | 3.79     | 216.15955 | 70.06581 (C4H8N+), *87.04457 (C4H7O2+), 98.06045 (C5H8NO+), 116.07083 (C5H10NO2+); (*) on in 1st peak                                                                                                                                                                                                                                                                                                                                                                                                                                                                   |
|       | 4.06     | 342.27521 |                                                                                                                                                                                                                                                                                                                                                                                                                                                                                                                                                                         |
|       | 4.13     | 228.15948 | 82.06570 (C5H8N+), 128.07069 (C6H10NO2+), 182.15378 (C11H20NO+)                                                                                                                                                                                                                                                                                                                                                                                                                                                                                                         |
|       | 4.13     | 257.22238 | 98.09682 (C6H12N+), 157.13353 (C8H17N2O+)                                                                                                                                                                                                                                                                                                                                                                                                                                                                                                                               |
|       | 4.17     | 269.22220 | 100.07610 (C5H10NO+), 169.13351 (C9H17N2O+)                                                                                                                                                                                                                                                                                                                                                                                                                                                                                                                             |
|       | 4.38     | 230.17513 | 57.07070 (C4H9+), 74.02430 (C2H4NO2+), 84.08134 (C5H10N+), 88.03981 (C3H6NO2+), 100.11246 (C6H14N+), 130.08630 (C6H12NO2+), 184.16948 (C11H22NO+)                                                                                                                                                                                                                                                                                                                                                                                                                       |
|       | 4.73     | 264.15961 | see growth medium, ES- table                                                                                                                                                                                                                                                                                                                                                                                                                                                                                                                                            |
|       | 4.83     | 244.19083 | 1st peak: 69.07059 (C5H9+), 88.03982 (C3H6NO2+), 98.09683 (C6H12N+), 116.10723 (C6H14NO+), 144.10191 (C7H14NO2+), 198.18529 (C12H24NO+); 2nd peak: 88.03980 (C3H6NO2+), 144.10188 (C7H14NO2+)                                                                                                                                                                                                                                                                                                                                                                           |
|       | 4.90     | 632.23187 | 1st peak: 97.02882 (C5H5O2+), 120.08095 (C8H10N+), 136.06178 (C5H6N5+), 162.04097 (C6H4N5O+), 202.08633 (C12H12NO2+), 220.09691 (C12H14NO3+), 281.09909 (C10H13N6O4+), 316.11795 (C17H18NO5+), 352.13849 (C17H22NO7+); 2nd peak: 120.08097 (C8H10N+), 136.06184 (C5H6N5+), 138.05499 (C7H8NO2+), 156.06543 (C7H10NO3+), 162.04094 (C6H4N5O+), 166.04977 (C8H8NO3+), 184.06036 (C8H10NO4+), 202.08618 (C12H12NO2+), 263.08847 (C10H11N6O3+), 303.13391 (C16H19N2O4+), 321.14447 (C16H21N2O5+), 339.15512 (C16H23N2O6+), 347.12360 (C17H19N2O6+), 500.18936 (C22H26N7O7+) |
|       | 5.30     | 616.23676 | see growth medium, ES- table                                                                                                                                                                                                                                                                                                                                                                                                                                                                                                                                            |
|       | 5.33     | 278.17508 | 105.07018 (C8H9+), 115.05444 (C9H7+), 117.05751 (C8H7N+, rad), 120.08093 (C8H10N+), 130.06517 (C9H8N+), 132.08078 (C9H10N+), 150.09135 (C9H12NO+), 178.08612 (C10H12NO2+)                                                                                                                                                                                                                                                                                                                                                                                               |
|       | 6.11     | 457.19751 | see growth medium, ES- table                                                                                                                                                                                                                                                                                                                                                                                                                                                                                                                                            |
|       | 6.21     | 212.23738 |                                                                                                                                                                                                                                                                                                                                                                                                                                                                                                                                                                         |
|       | 6.31     | 280.26367 |                                                                                                                                                                                                                                                                                                                                                                                                                                                                                                                                                                         |
|       | 6.52     | 239.20045 |                                                                                                                                                                                                                                                                                                                                                                                                                                                                                                                                                                         |
|       | 6.55     | 418.27142 |                                                                                                                                                                                                                                                                                                                                                                                                                                                                                                                                                                         |
|       | 6.67     | 590.39038 | 85.02900 (C4H5O2+)                                                                                                                                                                                                                                                                                                                                                                                                                                                                                                                                                      |
|       | 6.83     | 428.30069 |                                                                                                                                                                                                                                                                                                                                                                                                                                                                                                                                                                         |
|       | 6.91     | 314.23239 | 85.02896 (C4H5O2+), 153.12738 (C10H17O+), 171.13792 (C10H19O2+), 255.15892 (C14H23O4+)                                                                                                                                                                                                                                                                                                                                                                                                                                                                                  |
|       | 6.94     | 356.31610 | 70.06580 (C4H8N+)                                                                                                                                                                                                                                                                                                                                                                                                                                                                                                                                                       |
|       | 6.96     | 310.27396 | 70.06580 (C4H8N+), 205.15918 (C15H25+), 223.20561 (C15H27O+), 292.26334 (C19H34NO+)                                                                                                                                                                                                                                                                                                                                                                                                                                                                                     |
|       | 7.10     | 324.28943 | see comments                                                                                                                                                                                                                                                                                                                                                                                                                                                                                                                                                            |
|       | 7.26     | 475.28391 | *58.99580 (C2H3S+), *76.02217 (C2H6NS+), *86.99043 (C3H3SO+), *88.02208 (C3H6NS+), *116.01672 (C4H6NSO+), *144.01143 (C5H6NSO2+), *162.02188 (C5H8NSO3+), *179.04823 (C5H11N2SO3+), 261.22104 (C18H29O+), 311.20334 (C18H31SO2+), 319.20923 (C20H31SO+), 337.21948 (C20H33SO2+), 347.20395 (C21H31SO2+), 354.24548 (C20H36NSO2+), 364.23041 (C21H34NSO2+), 365.21454 (C21H33SO3+), 376.22934 (C22H34NSO2+), 394.24167 (C22H36NSO3+), 422.23593 (C23H36NSO4+), 440.24655 (C23H38NSO5+), 457.27328 (C23H41N2SO5+); (*) Cys-Gly and its fragments                          |
|       | 7.34     | 455.31140 | 95.06081 (C5H7N2+), 109.07635 (C6H9N2+), 121.07620 (C7H9N2+), 123.09181 (C7H11N2+), 135.09169 (C8H11N2+) and further series of N2 fragments up to C16, 270.22144 (C19H28N+), 287.024802 (C19H31N2+), 305.25858 (C19H33N2O+), 437.30109 (C24H41N2O5+)                                                                                                                                                                                                                                                                                                                    |
|       | 7.39     | 396.31070 | 74.02425 (C2H4NO2+), 84.08131 (C5H10N+), 88.03979 (C3H6NO2+), 116.10716 (C6H14NO+), 130.08627 (C6H12NO2+)                                                                                                                                                                                                                                                                                                                                                                                                                                                               |
|       | 7.66     | 428.33694 | 60.08155 (C3H10N+), 85.02894 (C4H5O2+)                                                                                                                                                                                                                                                                                                                                                                                                                                                                                                                                  |
|       | 7.72     | 439.31671 | 95.06084 (C5H7N2+), 109.07632 (C6H9N2+), 137.07092 (C7H9N2O+), 151.08655 (C8H11N2O+), 223.10779 (C11H15N2O3+), 241.11810 (C11H17N2O4+), 287.24792 (C19H31N2+), 301.26358 (C20H33N2+), 313.26379 (C21H33N2+), 331.27411 (C21H35N2O+), 361.28433 (C22H37N2O2+), 389.27933 (C23H37N2O3+), 403.29550 (C24H39N2O3+), 421.30582 (C24H41N2O4+)                                                                                                                                                                                                                                 |
|       | 8.04     | 339.20660 | 144.08070 (C10H10N+), 161.10715 (C10H13N2+), 179.10649 (C11H15O2+), 187.08647 (C11H11N2O+), 196.13309 (C11H18NO2+)                                                                                                                                                                                                                                                                                                                                                                                                                                                      |
|       | 8.27     | 442.35260 | 85.02894 (C4H5O2+)                                                                                                                                                                                                                                                                                                                                                                                                                                                                                                                                                      |
|       | 8.30     | 301.23721 | 223.20549 (C15H27O+), 229.19502 (C17H25+), 247.20540 (C17H27O+), 265.21597 (C17H29O2+), 283.22684 (C17H31O3+)                                                                                                                                                                                                                                                                                                                                                                                                                                                           |

|      |       |           |                                                                                                                                                                                                                                                                                                                                                                                                                                                                               |
|------|-------|-----------|-------------------------------------------------------------------------------------------------------------------------------------------------------------------------------------------------------------------------------------------------------------------------------------------------------------------------------------------------------------------------------------------------------------------------------------------------------------------------------|
|      | 8.31  | 426.28476 | 288.23178 (C19H30NO+), 306.24283 (C19H32NO2+), 318.24274 (C20H32NO2+), 360.25345 (C22H34NO3+), 390.26404 (C23H36NO4+), 408.27460 (C23H38NO5+)                                                                                                                                                                                                                                                                                                                                 |
|      | 8.40  | 285.24234 | 185.15355 (C11H21O2+), 231.21062 (C17H27+), 249.22116 (C17H29O+), 267.23166 (C17H31O2+)                                                                                                                                                                                                                                                                                                                                                                                       |
|      | 8.63  | 283.22693 | 205.19508 (C15H25+), 223.20557 (C15H27O+), 229.19501 (C17H25+), 247.20555 (C17H27O+), 265.21603 (C17H29O2+)                                                                                                                                                                                                                                                                                                                                                                   |
|      | 9.02  | 331.22415 |                                                                                                                                                                                                                                                                                                                                                                                                                                                                               |
|      | 9.06  | 297.24246 | 219.21074 (C16H27+), 237.22118 (C16H29O+), 243.21059 (C18H27+), 261.22119 (C18H29O+), 279.23172 (C18H31O2+)                                                                                                                                                                                                                                                                                                                                                                   |
| ascr | 9.21  | 668.45862 | 263.27316 (C19H35+), 281.28372 (C19H37O+), 287.27304 (C21H35+), 305.28366 (C21H37O+), 323.29434 (C21H39O2+), 341.30484 (C21H41O3+), 359.31561 (C21H43O4+)                                                                                                                                                                                                                                                                                                                     |
|      | 9.36  | 476.39493 | 275.27310 (C20H35+), 293.28369 (C20H37O+), 311.29410 (C20H39O2+), 329.30499 (C20H41O3+)                                                                                                                                                                                                                                                                                                                                                                                       |
|      | 9.38  | 211.20580 |                                                                                                                                                                                                                                                                                                                                                                                                                                                                               |
|      | 9.42  | 457.36377 | 2nd peak: *87.05579 (C3H7N2O+), *88.03979 (C3H6NO2+), *133.06075 (C4H9N2O3+), 394.33167 (C24H44NO3+), 422.32617 (C25H44NO4+), 439.35263 (C25H47N2O4+); (*) Asn and its fragments                                                                                                                                                                                                                                                                                              |
| ascr | 9.47  | 483.32962 | 353.26608 (C19H38O4Na+)                                                                                                                                                                                                                                                                                                                                                                                                                                                       |
|      | 9.47  | 313.27374 | 199.16934 (C12H23O2+), 213.18494 (C13H25O2+), 277.25229 (C19H33O+), 295.26276 (C19H35O2+)                                                                                                                                                                                                                                                                                                                                                                                     |
|      | 9.49  | 287.25790 | 7.95 and 8.10 min: 233.22609 (C17H29+), 251.23662 (C17H31O+); 8.84 min: maynot be diff. based on 269.24750; 9.49 min: 233.22618 (C17H29+), 251.23653 (C17H31O+), 269.24722 (C17H33O2+)                                                                                                                                                                                                                                                                                        |
|      | 9.49  | 309.24005 |                                                                                                                                                                                                                                                                                                                                                                                                                                                                               |
|      | 9.54  | 227.20062 | 191.17937 (C14H23+)                                                                                                                                                                                                                                                                                                                                                                                                                                                           |
| S    | 9.56  | 388.28793 | 75.02692 (C3H7S+), 92.05330 (C3H10NS+), 219.21069 (C16H27+), 243.21051 (C18H27+), 261.22113 (C18H29O+), 304.26331 (C20H34NO+), 322.27380 (C20H36NO2+), 352.26666 (C21H38NSO+), 370.27725 (C21H40NSO2+)                                                                                                                                                                                                                                                                        |
|      | 9.56  | 307.22427 |                                                                                                                                                                                                                                                                                                                                                                                                                                                                               |
|      | 9.57  | 333.23987 |                                                                                                                                                                                                                                                                                                                                                                                                                                                                               |
|      | 9.61  | 583.49659 |                                                                                                                                                                                                                                                                                                                                                                                                                                                                               |
|      | 9.65  | 223.20564 |                                                                                                                                                                                                                                                                                                                                                                                                                                                                               |
|      | 9.66  | 682.47375 | see growth medium, ES- table                                                                                                                                                                                                                                                                                                                                                                                                                                                  |
|      | 9.94  | 255.23177 | 219.21059 (C16H27+), 237.22107 (C16H29O+)                                                                                                                                                                                                                                                                                                                                                                                                                                     |
|      | 9.98  | 708.48975 | see growth medium, ES- table                                                                                                                                                                                                                                                                                                                                                                                                                                                  |
|      | 10.01 | 458.38403 | 1st peak: *86.09698 (C5H12N+), *132.10196 (C6H14NO2+), 309.27863 (C20H37O2+), (*) Leu/Ile and its fragment; 2nd peak: **72.08142 (C4H10N+), **118.08641 (C5H12NO2+), 305.28314 (C21H37O+), 323.29419 (C21H39O2+), (**) Val and its fragment                                                                                                                                                                                                                                   |
|      | 10.02 | 327.28928 | 213.18472 (C13H25O2+), 227.20042 (C14H27O2+), 291.26801 (C20H35O+), 309.27856 (C20H37O2+)                                                                                                                                                                                                                                                                                                                                                                                     |
|      | 10.18 | 696.48914 | see growth medium, ES- table                                                                                                                                                                                                                                                                                                                                                                                                                                                  |
|      | 10.24 | 295.22650 | 2nd peak: 217.19507 (C16H25+), 235.20557 (C16H27O+), 245.18993 (C17H25O+), 277.21588 (C18H29O2+)                                                                                                                                                                                                                                                                                                                                                                              |
|      | 10.25 | 237.22107 |                                                                                                                                                                                                                                                                                                                                                                                                                                                                               |
|      | 10.43 | 305.24741 |                                                                                                                                                                                                                                                                                                                                                                                                                                                                               |
|      | 10.43 | 487.39969 | 303.30484 (C22H39+), 321.31509 (C22H41O+)                                                                                                                                                                                                                                                                                                                                                                                                                                     |
|      | 10.50 | 665.41718 |                                                                                                                                                                                                                                                                                                                                                                                                                                                                               |
|      | 10.52 | 259.26318 |                                                                                                                                                                                                                                                                                                                                                                                                                                                                               |
|      | 10.54 | 275.23685 |                                                                                                                                                                                                                                                                                                                                                                                                                                                                               |
|      | 10.56 | 386.36292 | 2nd (larger) peak: 269.24734 (C17H33O2+), 333.31503 (C23H41O+), 351.32556 (C23H43O2+)                                                                                                                                                                                                                                                                                                                                                                                         |
|      | 10.56 | 472.39972 | 86.09695 (C5H12N+), 132.10193 (C6H14NO2+), 323.28422 (C21H39O2+)                                                                                                                                                                                                                                                                                                                                                                                                              |
|      | 10.58 | 506.40527 | see growth medium, ES- table                                                                                                                                                                                                                                                                                                                                                                                                                                                  |
|      | 10.58 | 471.37943 | 1st peak: 83.06091 (C4H7N2+), 84.04494 (C4H6NO+), **129.06595 (C5H9N2O2+), **130.04993 (C5H8NO3+), **147.07635 (C5H11N2O3+), 299.25815 (C18H35O3+), 453.36816 (C26H49N2O4+), (**) Gln and its fragments; 2nd peak: *87.05583 (C3H7N2O+), *88.03983 (C3H6NO2+), *133.06085 (C4H9N2O3+), 408.34723 (C25H46NO3+), 436.34235 (C26H46NO4+), 453.36960 (C26H49N2O4+); (*) Asn and its fragments                                                                                     |
|      | 10.58 | 710.50494 | see growth medium, ES- table                                                                                                                                                                                                                                                                                                                                                                                                                                                  |
| ascr | 10.60 | 652.46326 | *85.02892 (C4H5O2+), *97.02877 (C5H5O2+), *113.05994 (C6H9O2+), *127.03899 (C6H7O3+), *145.04950 (C6H9O4+), 289.28839 (C21H37+), 307.29959 (C21H39O+), 325.31000 (C21H41O2+); (*) glucose fragments                                                                                                                                                                                                                                                                           |
|      | 10.63 | 476.35864 | 62.06079 (C2H8NO+), 297.27911 (C19H37O2+), 314.30508 (C19H40NO2+)                                                                                                                                                                                                                                                                                                                                                                                                             |
|      | 10.75 | 334.27405 | 110.06033 (C6H8NO+), 111.06813 (C6H9NO+), 124.07579 (C7H10NO+), 304.26321 (C20H34NO+)                                                                                                                                                                                                                                                                                                                                                                                         |
|      | 10.79 | 251.23682 |                                                                                                                                                                                                                                                                                                                                                                                                                                                                               |
| ascr | 10.92 | 622.45288 | see growth medium, ES- table                                                                                                                                                                                                                                                                                                                                                                                                                                                  |
|      | 11.06 | 501.41519 | 317.32004 (C23H41+), 335.33054 (C23H43O+), 353.34082 (C23H45O2+)                                                                                                                                                                                                                                                                                                                                                                                                              |
|      | 11.06 | 629.47437 | 1st peak: 83.06097 (C4H7N2+), 84.04498 (C4H6NO+), 101.07135 (C4H9N2O+), 129.06596 (C5H9N2O2+), 130.04994 (C5H8NO3+), 147.07637 (C5H11N2O3+), 335.33069 (C23H43O+), 464.37433 (C28H50NO4+), 481.40012 (C28H53N2O4+), 499.40958 (C28H55N2O5+); 2nd and 3rd peaks: 87.05583 (C3H7N2O+), 88.03983 (C3H6NO2+), 116.03453 (C4H6NO3+), 133.06078 (C4H9N2O3+), 349.34616 (C24H45O+), 436.37772 (C27H50NO3+), 464.37372 (C28H50NO4+), 481.39999 (C28H53N2O4+), 499.41113 (C28H55N2O5+) |
|      | 11.08 | 395.35223 |                                                                                                                                                                                                                                                                                                                                                                                                                                                                               |
|      | 11.11 | 486.41544 | 1st and 2nd peaks: 86.09697 (C5H12N+), 132.10196 (C6H14NO2+), 337.31006 (C22H41O2+); 3rd peak: 72.08147 (C4H10N+), 118.08649 (C5H12NO2+), 351.32550 (C23H43O2+)                                                                                                                                                                                                                                                                                                               |
| ascr | 11.13 | 503.39465 | see growth medium, ES- table                                                                                                                                                                                                                                                                                                                                                                                                                                                  |

|      |       |           |                                                                                                                                                                                                                            |
|------|-------|-----------|----------------------------------------------------------------------------------------------------------------------------------------------------------------------------------------------------------------------------|
|      | 11.14 | 355.32062 | 241.21585 (C15H29O2+), 255.23161 (C16H31O2+), 319.29929 (C22H39O+), 337.30957 (C22H41O2+)                                                                                                                                  |
| ascr | 11.14 | 666.47919 | see growth medium, ES- table                                                                                                                                                                                               |
|      | 11.20 | 373.33142 | 277.28873 (C20H37+), 295.29941 (C20H39O+), 301.28897 (C22H37+), 319.29922 (C22H39O+)                                                                                                                                       |
|      | 11.26 | 424.37860 | 141.12735 (C9H17O+), 406.36765 (C26H48NO2+)                                                                                                                                                                                |
|      | 11.38 | 643.49011 | see growth medium, ES- table                                                                                                                                                                                               |
|      | 11.52 | 383.35205 | 1st peak is a fragment of 545.40497/675.46814/692.49469; 2nd peak: 269.24753 (C17H33O2+), 283.26294 (C18H35O2+), 329.32053 (C24H41+), 347.33075 (C24H43O+), 365.34122 (C24H45O2+)                                          |
| ascr | 11.55 | 692.49469 | see growth medium, ES- table                                                                                                                                                                                               |
|      | 11.56 | 369.33624 | 1st peak: 255.23184 (C16H31O2+), 269.24744 (C17H33O2+), 333.31528 (C23H41O+), 351.32574 (C23H43O2+); 2nd peak: 291.30457 (C21H39+), 309.31516 (C21H41O+), 315.30472 (C23H39+), 333.31479 (C23H41O+), 351.32501 (C23H43O2+) |
|      | 11.59 | 565.40063 | 130.06526 (C9H8N+), 132.04446 (C8H6NO+), 145.07610 (C9H9N2+), 173.07098 (C10H9N2O+), 201.10231 (C12H13N2O+), 244.13321 (C15H18NO2+), 519.39490 (C34H51N2O2+), 547.38953 (C35H51N2O3+)                                      |
| ascr | 11.67 | 534.43719 | see growth medium, ES- table                                                                                                                                                                                               |
|      | 11.67 | 387.34708 | 291.30429 (C21H39+), 309.31503 (C21H41O+), 315.30444 (C23H39+), 333.31461 (C23H41O+)                                                                                                                                       |
|      | 11.68 | 680.49506 | 85.02897 (C4H5O2+), 97.02881 (C5H5O2+), 113.06000 (C6H9O2+), 127.03908 (C6H7O3+), 145.04958 (C6H9O4+), 317.32047 (C23H41+), 335.33081 (C23H43O+), 353.34143 (C23H45O2+)                                                    |
|      | 11.68 | 567.38733 | see growth medium, ES- table                                                                                                                                                                                               |
|      | 11.75 | 446.38434 | 263.27313 (C19H35+), 281.28372 (C19H37O+)                                                                                                                                                                                  |
|      | 11.76 | 385.36768 | 331.33572 (C24H43+), 349.34641 (C24H45O+)                                                                                                                                                                                  |
|      | 11.83 | 694.51080 | see growth medium, ES- table                                                                                                                                                                                               |
|      | 12.08 | 401.36282 | 1st and 2nd peaks: 291.30478 (C21H39+), 309.31613 (C21H41O+), 329.32022 (C24H41+), 347.33069 (C24H43O+); 3rd peak: 329.32022 (C24H41+), 347.33069 (C24H43O+)                                                               |
|      | 12.13 | 548.45288 | see 529.41119 at 10.79 min in growth medium, ES- table                                                                                                                                                                     |
|      | 12.27 | 641.46100 |                                                                                                                                                                                                                            |
| ascr | 12.28 | 460.40009 | 277.28912 (C20H37+), 295.29941 (C20H39O+), 313.30991 (C20H41O2+, only in 2nd peak)                                                                                                                                         |
| ascr | 12.32 | 664.50043 | 85.02897 (C4H5O2+), 97.02885 (C5H5O2+), 113.06002 (C6H9O2+), 127.03912 (C6H7O3+), 145.04959 (C6H9O4+), 319.33609 (C23H43+), 337.34634 (C23H45O+)                                                                           |
| ascr | 12.56 | 720.52612 | see growth medium, ES- table                                                                                                                                                                                               |
|      | 12.56 | 411.38327 | 319.33582 (C23H43+), 347.36755 (C25H47+), 357.35129 (C26H45+), 375.36182 (C26H47O+)                                                                                                                                        |
| ascr | 12.63 | 516.42645 | 315.30453 (C23H39+), 333.31488 (C23H41O+), 351.32532 (C23H43O2+)                                                                                                                                                           |
| ascr | 12.75 | 562.46753 | 319.33572 (C23H43+), 337.34616 (C23H45O+), 343.33557 (C25H43+), 361.34607 (C25H45O+), 379.35681 (C25H47O2+), 397.36749 (C25H49O3+)                                                                                         |
| ascr | 12.77 | 474.41571 | 291.30441 (C21H39+), 309.31497 (C21H41O+)                                                                                                                                                                                  |
| ascr | 12.80 | 722.54144 | see growth medium, ES- table                                                                                                                                                                                               |
|      | 12.81 | 609.43365 |                                                                                                                                                                                                                            |
| ascr | 12.99 | 606.49457 | 331.33591 (C24H43+), 349.34637 (C24H45O+), 367.35715 (C24H47O2+), 423.38321 (C27H51O3+), 441.39398 (C27H53O4+)                                                                                                             |
| ascr | 13.06 | 371.35159 | see growth medium, ES- table                                                                                                                                                                                               |
|      | 13.13 | 581.43903 |                                                                                                                                                                                                                            |
| ascr | 13.25 | 488.43115 | 305.32007 (C22H41+), 323.33057 (C22H43O+)                                                                                                                                                                                  |
| ascr | 13.71 | 595.45496 | see growth medium, ES- table                                                                                                                                                                                               |
| ascr | 13.74 | 502.44705 | 319.33566 (C23H43+), 337.34619 (C23H45O+)                                                                                                                                                                                  |
|      | 13.79 | 637.46527 |                                                                                                                                                                                                                            |
| ascr | 14.14 | 516.46271 | 333.35144 (C24H45+), 351.36203 (C24H47O+)                                                                                                                                                                                  |

**Table S18. SMID-DB identifiers, retention times, and  $m/z$  of known ascarosides detected in the analyzed *C. elegans* N2 and *P. pacificus* RS2333 cultures.** For all ascarosides except ascr#4,  $m/z$  corresponds to molecular ions,  $[M-H]^-$ . For ascr#4, listed  $m/z$  is for the formic acid (FA) adduct,  $[M+FA-H]^-$ .

| SMID-DB ID   | RT (min) | $m/z$ calc. (ES-) | Species  |
|--------------|----------|-------------------|----------|
| ascr#5       | 1.64     | 219.08741         | Cel      |
| ascr#11      | 2.89     | 233.10306         | Cel      |
| ascr#9       | 3.59     | 247.11871         | Cel, Ppa |
| oscr#9       | 3.68     | 247.11871         | Cel      |
| ascr#12      | 4.15     | 261.13436         | Cel, Ppa |
| ascr#7       | 4.49     | 273.13436         | Cel      |
| ascr#1       | 4.68     | 275.15001         | Cel, Ppa |
| ascr#14      | 5.22     | 289.16566         | Cel      |
| ascr#3       | 5.56     | 301.16566         | Cel      |
| ascr#10      | 5.76     | 303.18131         | Cel      |
| ascr#16      | 6.29     | 317.19696         | Cel      |
| ascr#18      | 6.82     | 331.21261         | Cel      |
| ascr#20      | 7.35     | 345.22826         | Cel      |
| ascr#22      | 7.88     | 359.24391         | Cel      |
| icas#9       | 6.56     | 390.15583         | Cel      |
| icas#3       | 7.89     | 444.20278         | Cel      |
| icas#10      | 8.07     | 446.21843         | Cel      |
| osas#9       | 4.91     | 482.20317         | Cel      |
| tsas#9       | 5.52     | 466.20826         | Cel      |
| osas#10      | 6.48     | 538.26577         | Cel      |
| ascr#4 (+FA) | 3.93     | 453.19775         | Cel      |
| osas#2       | 5.39     | 480.22391         | Cel      |
| icas#7       | 7.12     | 416.17148         | Cel      |
| icas#1       | 7.23     | 418.18713         | Cel      |
| pasc#9       | 5.65     | 466.20826         | Ppa      |
| pasc#12      | 5.92     | 480.22391         | Ppa      |
| pasc#1       | 6.21     | 494.23956         | Ppa      |
| ubas#1       | 5.88     | 605.29271         | Ppa      |
| ubas#2       | 6.1      | 619.30836         | Ppa      |
| dasc#1       | 6.6      | 533.29674         | Ppa      |
| part#9       | 3.75     | 247.11871         | Ppa      |
| npar#1       | 4.55     | 641.24241         | Ppa      |
| npar#2       | 4.76     | 509.20015         | Ppa      |
| npar#3       | 4.71     | 525.19506         | Ppa      |
| pasa#9       | 6.8      | 585.24537         | Ppa      |

**SUPPORTING REFERENCES**

1. Zhang, Y. K.; Sanchez-Ayala, M. A.; Sternberg, P. W.; Srinivasan, J.; Schroeder, F. C. *Org. Lett.* **2017**, *19* (11), 2837-40.
2. Buck, I. M.; Reese, C. B. *J. Chem. Soc., Perkin Trans. 1* **1990**, (11), 2937-42.
3. Deutsch, C.; El Yacoubi, B.; de Crecy-Lagard, V.; Iwata-Reuyl, D. *J. Biol. Chem.* **2012**, *287* (17), 13666-73.
